# Supplementary material for: Effects of Genetics and Sex on Acute Gene Expression Changes in the Hippocampus Following Neonatal Ethanol Exposure in BXD Recombinant Inbred Mouse Strains
Source: MDPI journal article supplement (doi:10.3390/brainsci12121634), 2022-11-29
Supplement: s1 [file s1]

**Supplemental Table S2.** Significant ( $adjp < 0.05$ ) ethanol-induced gene expression changes within each strain. NS = not significant.

| Accession    | Gene Symbol          | Strain | Adjp-value<br>Male | Fold<br>Change<br>Male | Adjp-value<br>Female | Fold<br>Change<br>Female |
|--------------|----------------------|--------|--------------------|------------------------|----------------------|--------------------------|
| NM_021446    | <i>0610007P14Rik</i> | B6     | NS                 | NS                     | 2.13E-03             | -1.4                     |
| NM_001081095 | <i>1700009N14Rik</i> | B6     | 3.37E-02           | 1.5                    | NS                   | NS                       |
| NM_198630    | <i>1810024B03Rik</i> | B6     | NS                 | NS                     | 1.99E-02             | 1.7                      |
| NM_001167925 | <i>A730017C20Rik</i> | B6     | 2.44E-02           | 1.2                    | NS                   | NS                       |
| NR_015488    | <i>A930003A15Rik</i> | B6     | 3.85E-06           | 2.9                    | NS                   | NS                       |
| NR_033609    | <i>A930017M01Rik</i> | B6     | 2.68E-02           | 1.6                    | NS                   | NS                       |
| NM_030210    | <i>Aacs</i>          | B6     | NS                 | NS                     | 7.86E-03             | -1.6                     |
| NM_013851    | <i>Abca8b</i>        | B6     | 5.88E-03           | 2.1                    | 2.53E-02             | 1.8                      |
| NM_178162    | <i>Agfg2</i>         | B6     | 6.51E-03           | -1.9                   | 3.85E-04             | -2.1                     |
| NM_001172146 | <i>Aimp2</i>         | B6     | NS                 | NS                     | 4.35E-02             | -1.6                     |
| NM_001035532 | <i>Akap2</i>         | B6     | NS                 | NS                     | 2.51E-02             | 1.5                      |
| NM_017476    | <i>Akap8l</i>        | B6     | 2.26E-02           | 1.4                    | NS                   | NS                       |
| NM_009658    | <i>Akr1b3</i>        | B6     | NS                 | NS                     | 2.49E-02             | -1.4                     |
| NM_011786    | <i>Aloxe3</i>        | B6     | 4.19E-02           | 2.1                    | NS                   | NS                       |
| NM_020581    | <i>Angptl4</i>       | B6     | NS                 | NS                     | 6.29E-04             | 2.3                      |
| NM_001024851 | <i>Ankrd34a</i>      | B6     | NS                 | NS                     | 1.26E-02             | -1.9                     |
| NM_001109914 | <i>Apold1</i>        | B6     | NS                 | NS                     | 3.67E-02             | 1.8                      |
| NM_001172205 | <i>Arid5a</i>        | B6     | 1.60E-02           | 2.0                    | 3.23E-03             | 2.1                      |
| NM_023598    | <i>Arid5b</i>        | B6     | 2.80E-04           | 1.8                    | 6.10E-05             | 1.8                      |
| NM_207231    | <i>Arl5c</i>         | B6     | 4.09E-02           | 1.9                    | NS                   | NS                       |
| NM_001042591 | <i>Arrdc3</i>        | B6     | 1.64E-08           | 3.0                    | 9.51E-08             | 2.8                      |
| NM_001042592 | <i>Arrdc4</i>        | B6     | 4.40E-04           | 2.0                    | 8.56E-04             | 1.9                      |
| NM_026855    | <i>Arv1</i>          | B6     | NS                 | NS                     | 2.67E-02             | -1.7                     |
| NM_026217    | <i>Atg12</i>         | B6     | 8.41E-03           | 1.4                    | NS                   | NS                       |
| NM_001199304 | <i>Atxn1</i>         | B6     | 5.49E-03           | 1.5                    | NS                   | NS                       |
| NM_001080930 | <i>Atxn1l</i>        | B6     | NS                 | NS                     | 2.63E-02             | 1.5                      |
| NM_016847    | <i>Avpr1a</i>        | B6     | 3.58E-02           | -1.7                   | NS                   | NS                       |
| NM_020025    | <i>B3galt2</i>       | B6     | 1.40E-02           | 1.6                    | 3.49E-02             | 1.5                      |
| NM_001159407 | <i>B3gnt5</i>        | B6     | NS                 | NS                     | 4.03E-02             | 1.6                      |
| NM_019835    | <i>B4galt5</i>       | B6     | NS                 | NS                     | 3.59E-02             | -1.4                     |
| NM_001001182 | <i>Baz2b</i>         | B6     | 4.01E-02           | 1.4                    | 4.63E-02             | 1.4                      |
| NM_175325    | <i>Bbs4</i>          | B6     | 1.00E-05           | 1.6                    | 5.88E-03             | 1.4                      |
| NM_001001332 | <i>BC117090</i>      | B6     | NS                 | NS                     | 4.63E-02             | -1.9                     |

|              |                      |    |          |      |          |      |
|--------------|----------------------|----|----------|------|----------|------|
| NM_001284410 | <i>Bcl2l11</i>       | B6 | 6.55E-05 | 2.5  | 2.57E-04 | 2.3  |
| NM_001122683 | <i>Bdh1</i>          | B6 | 4.83E-02 | -1.3 | NS       | NS   |
| NM_172506    | <i>Boc</i>           | B6 | NS       | NS   | 2.67E-02 | -1.6 |
| NM_133889    | <i>Bsdc1</i>         | B6 | 1.04E-03 | 1.5  | 6.71E-05 | 1.5  |
| NM_007570    | <i>Btg2</i>          | B6 | 7.06E-05 | 2.1  | 1.50E-03 | 1.9  |
| NM_009770    | <i>Btg3</i>          | B6 | 7.06E-03 | 1.8  | NS       | NS   |
| ENSMUST0000  |                      |    |          |      |          | -1.6 |
| 0180393      | <i>C130032M10Rik</i> | B6 | NS       | NS   | 1.27E-02 |      |
| NM_026192    | <i>Calcoco1</i>      | B6 | NS       | NS   | 1.01E-02 | 1.5  |
| NM_144817    | <i>Camk1g</i>        | B6 | 3.13E-03 | -1.5 | 2.07E-05 | -1.8 |
| NM_025451    | <i>Camk2n1</i>       | B6 | 1.05E-02 | 1.5  | NS       | NS   |
| NM_007625    | <i>Cbx4</i>          | B6 | NS       | NS   | 8.01E-03 | -1.5 |
| NM_144820    | <i>Ccdc28a</i>       | B6 | 4.60E-04 | 2.3  | 1.01E-02 | 1.9  |
| NM_007631    | <i>Ccnd1</i>         | B6 | 8.73E-03 | -1.6 | 4.40E-04 | -1.7 |
| NM_009831    | <i>Ccng1</i>         | B6 | 4.83E-02 | 1.3  | NS       | NS   |
| NM_001111060 | <i>Cd59a</i>         | B6 | NS       | NS   | 3.12E-02 | 2.0  |
| NM_001081345 | <i>Chd2</i>          | B6 | 2.49E-02 | 1.5  | 1.50E-03 | 1.6  |
| NM_139134    | <i>Chodl</i>         | B6 | NS       | NS   | 4.83E-02 | -1.9 |
| NM_001289429 | <i>Cipc</i>          | B6 | NS       | NS   | 1.30E-03 | -1.5 |
| NM_025854    | <i>Cir1</i>          | B6 | 9.68E-03 | 1.5  | NS       | NS   |
| NM_001243762 | <i>Clcn5</i>         | B6 | 4.35E-02 | 1.6  | 1.93E-02 | 1.6  |
| NM_009904    | <i>Clgn</i>          | B6 | NS       | NS   | 4.98E-02 | 1.5  |
| NM_026977    | <i>Cnppd1</i>        | B6 | 1.78E-02 | 1.5  | NS       | NS   |
| NM_008779    | <i>Cntn3</i>         | B6 | 1.89E-02 | 1.6  | NS       | NS   |
| NM_001039710 | <i>Coq10b</i>        | B6 | NS       | NS   | 4.97E-02 | -1.5 |
| NM_001252525 | <i>Cpeb1</i>         | B6 | 1.31E-02 | 2.0  | NS       | NS   |
| NM_001177379 | <i>Cpeb2</i>         | B6 | NS       | NS   | 1.99E-02 | 1.5  |
| NM_172728    | <i>Creb5</i>         | B6 | NS       | NS   | 1.88E-03 | 2.1  |
| NM_001110850 | <i>Crem</i>          | B6 | 1.73E-02 | 1.7  | 1.62E-02 | 1.7  |
| NM_007762    | <i>Crhr1</i>         | B6 | NS       | NS   | 1.45E-03 | -2.0 |
| NM_001113330 | <i>Crx</i>           | B6 | 1.17E-02 | 2.4  | NS       | NS   |
| NM_001082573 | <i>Crygc</i>         | B6 | NS       | NS   | 4.98E-02 | 1.4  |
| NM_001085448 | <i>Ctnnd1</i>        | B6 | NS       | NS   | 1.98E-02 | 1.4  |
| NM_153775    | <i>Ctu2</i>          | B6 | NS       | NS   | 1.73E-02 | -1.7 |
| NM_007808    | <i>Cycs</i>          | B6 | NS       | NS   | 2.45E-02 | -1.2 |
| NM_009994    | <i>Cyp1b1</i>        | B6 | NS       | NS   | 1.73E-02 | 2.2  |
| NM_028979    | <i>Cyp2j9</i>        | B6 | 6.88E-04 | 2.1  | NS       | NS   |
| NM_020010    | <i>Cyp51</i>         | B6 | 2.13E-03 | -1.5 | 6.52E-03 | -1.4 |

|              |                 |    |          |      |          |      |
|--------------|-----------------|----|----------|------|----------|------|
| NM_010516    | <i>Cyr61</i>    | B6 | NS       | NS   | 2.67E-02 | 1.7  |
| NM_001165980 | <i>Dcaf17</i>   | B6 | 4.63E-02 | 1.4  | NS       | NS   |
| NM_019553    | <i>Ddx21</i>    | B6 | NS       | NS   | 3.51E-03 | -1.6 |
| NM_001252457 | <i>Ddx39b</i>   | B6 | 1.31E-02 | -1.4 | NS       | NS   |
| NM_001282055 | <i>Ddx46</i>    | B6 | NS       | NS   | 4.11E-02 | -1.5 |
| NM_010030    | <i>Defb2</i>    | B6 | NS       | NS   | 3.59E-02 | 2.1  |
| NM_053272    | <i>Dhcr24</i>   | B6 | 9.19E-07 | -1.6 | 6.67E-08 | -1.7 |
| NR_002854    | <i>Dlx1as</i>   | B6 | NS       | NS   | 2.24E-03 | -2.2 |
| NM_025926    | <i>Dnajb4</i>   | B6 | NS       | NS   | 2.72E-03 | 1.5  |
| NM_001163026 | <i>Dnajc13</i>  | B6 | NS       | NS   | 4.11E-02 | -1.4 |
| NM_007882    | <i>Dsc3</i>     | B6 | 3.66E-02 | 3.7  | NS       | NS   |
| NM_001285807 | <i>Dtna</i>     | B6 | 4.65E-02 | 1.3  | 9.46E-03 | 1.3  |
| NM_013642    | <i>Dusp1</i>    | B6 | 8.59E-08 | 2.4  | 4.94E-10 | 2.8  |
| NM_001048054 | <i>Dusp16</i>   | B6 | 8.38E-04 | 2.0  | 1.13E-04 | 2.2  |
| NM_176933    | <i>Dusp4</i>    | B6 | NS       | NS   | 2.51E-02 | -1.7 |
| NM_001085390 | <i>Dusp5</i>    | B6 | NS       | NS   | 2.25E-02 | -1.7 |
| NM_026268    | <i>Dusp6</i>    | B6 | 1.54E-02 | -1.6 | NS       | NS   |
| NM_008748    | <i>Dusp8</i>    | B6 | 4.31E-08 | 1.7  | 7.08E-04 | 1.4  |
| NM_026932    | <i>Ebna1bp2</i> | B6 | NS       | NS   | 4.56E-02 | -1.4 |
| NM_001110331 | <i>Eci2</i>     | B6 | NS       | NS   | 2.41E-02 | 1.4  |
| NM_010104    | <i>Edn1</i>     | B6 | NS       | NS   | 1.56E-03 | 2.9  |
| NM_001289925 | <i>Egr3</i>     | B6 | 6.55E-05 | -2.3 | 2.33E-06 | -2.6 |
| NM_001289927 | <i>Egr3</i>     | B6 | NS       | NS   | 2.64E-02 | -1.8 |
| NM_018781    | <i>Egr3</i>     | B6 | NS       | NS   | 4.36E-02 | -1.7 |
| NM_010121    | <i>Eif2ak3</i>  | B6 | NS       | NS   | 2.67E-02 | 1.5  |
| NM_001253692 | <i>Elmod3</i>   | B6 | 3.90E-02 | 1.5  | 4.18E-02 | 1.4  |
| NM_175313    | <i>Eogt</i>     | B6 | NS       | NS   | 9.80E-03 | 1.6  |
| NM_023612    | <i>Esm1</i>     | B6 | NS       | NS   | 1.01E-02 | 2.0  |
| NM_008815    | <i>Etv4</i>     | B6 | 2.69E-03 | -1.7 | 5.02E-05 | -1.9 |
| NM_023794    | <i>Etv5</i>     | B6 | 4.50E-04 | -1.9 | 2.66E-04 | -1.9 |
| NM_007970    | <i>Ezh1</i>     | B6 | 4.01E-02 | 1.4  | NS       | NS   |
| NM_010171    | <i>F3</i>       | B6 | NS       | NS   | 1.15E-02 | 1.6  |
| NM_001163567 | <i>Fam102b</i>  | B6 | 1.88E-02 | 1.3  | NS       | NS   |
| NM_183187    | <i>Fam107a</i>  | B6 | 7.06E-03 | 2.3  | 1.25E-05 | 3.3  |
| NM_025582    | <i>Fam213b</i>  | B6 | NS       | NS   | 3.22E-02 | -1.6 |
| NM_178908    | <i>Fam26e</i>   | B6 | 3.72E-04 | 2.0  | 5.13E-05 | 2.1  |
| NM_175104    | <i>Fam53c</i>   | B6 | 1.14E-02 | 1.8  | NS       | NS   |
| NM_178797    | <i>Far2</i>     | B6 | NS       | NS   | 3.12E-02 | -1.4 |

|              |                 |    |          |      |          |      |
|--------------|-----------------|----|----------|------|----------|------|
| NM_028149    | <i>Fbxl20</i>   | B6 | 3.55E-02 | 1.4  | NS       | NS   |
| NM_010191    | <i>Fdft1</i>    | B6 | 4.50E-04 | -1.4 | 1.20E-05 | -1.5 |
| NM_008003    | <i>Fgf15</i>    | B6 | 4.25E-02 | -1.8 | NS       | NS   |
| NM_001164259 | <i>Fgfr1</i>    | B6 | 4.14E-02 | -1.5 | NS       | NS   |
| NM_022009    | <i>Flii</i>     | B6 | NS       | NS   | 2.55E-02 | -1.5 |
| NM_001081416 | <i>Fndc1</i>    | B6 | 1.97E-02 | 1.5  | NS       | NS   |
| NM_001159706 | <i>Folh1</i>    | B6 | 8.41E-03 | 2.1  | 6.92E-04 | 2.4  |
| NM_001163282 | <i>Gdf1</i>     | B6 | NS       | NS   | 2.97E-02 | -2.0 |
| NM_029102    | <i>Glt8d2</i>   | B6 | 1.80E-03 | 2.4  | NS       | NS   |
| ENSMUST0000  |                 |    |          |      |          | 2.5  |
| 0092165      | <i>Gm10271</i>  | B6 | NS       | NS   | 3.41E-02 |      |
| uc029usq.1   | <i>Gm13308</i>  | B6 | 1.99E-02 | 1.5  | NS       | NS   |
| ENSMUST0000  |                 |    |          |      |          | 2.1  |
| 0112772      | <i>Gm3443</i>   | B6 | NS       | NS   | 4.11E-02 |      |
| NM_027518    | <i>Gpr137c</i>  | B6 | 9.01E-09 | 2.3  | 5.27E-07 | 2.0  |
| NM_001167694 | <i>Gpr19</i>    | B6 | NS       | NS   | 5.88E-03 | 1.6  |
| NM_010338    | <i>Gpr37</i>    | B6 | 1.01E-02 | 1.7  | 4.05E-03 | 1.8  |
| NM_175490    | <i>Gpr75</i>    | B6 | 4.77E-02 | 1.4  | NS       | NS   |
| NM_145066    | <i>Gpr85</i>    | B6 | 1.05E-02 | 1.5  | NS       | NS   |
| NM_001114333 | <i>Grm1</i>     | B6 | 1.99E-02 | 1.5  | NS       | NS   |
| NM_198962    | <i>Hctr2</i>    | B6 | NS       | NS   | 4.50E-02 | -1.6 |
| NM_144835    | <i>Heatr1</i>   | B6 | 1.68E-02 | -1.7 | 5.62E-04 | -1.9 |
| NM_175256    | <i>Heg1</i>     | B6 | NS       | NS   | 2.30E-03 | 1.8  |
| NM_001162950 | <i>Hif3a</i>    | B6 | NS       | NS   | 4.18E-02 | 2.0  |
| NM_025812    | <i>Hmg20a</i>   | B6 | NS       | NS   | 2.96E-02 | 1.4  |
| NM_008252    | <i>Hmgb2</i>    | B6 | NS       | NS   | 3.70E-02 | 1.6  |
| NM_008255    | <i>Hmgcr</i>    | B6 | 2.32E-02 | -1.5 | 2.10E-03 | -1.6 |
| NM_008256    | <i>Hmgcs2</i>   | B6 | NS       | NS   | 3.23E-03 | 2.4  |
| NM_016805    | <i>Hnrnpu</i>   | B6 | 4.09E-02 | -1.3 | NS       | NS   |
| NM_053262    | <i>Hsd17b11</i> | B6 | 2.13E-03 | 1.6  | 4.71E-02 | 1.4  |
| NM_010476    | <i>Hsd17b7</i>  | B6 | 3.55E-03 | -1.6 | 2.69E-05 | -1.8 |
| NM_019564    | <i>Htra1</i>    | B6 | 4.40E-02 | 1.6  | 1.27E-02 | 1.7  |
| NM_010495    | <i>Id1</i>      | B6 | NS       | NS   | 3.41E-02 | 1.7  |
| NM_145360    | <i>Idi1</i>     | B6 | 2.41E-07 | -2.1 | 2.32E-09 | -2.3 |
| NM_013562    | <i>Ifrd1</i>    | B6 | 4.06E-02 | -1.6 | 5.88E-03 | -1.7 |
| NM_008384    | <i>Inpp1</i>    | B6 | 3.47E-02 | 1.7  | NS       | NS   |
| NM_153526    | <i>Insig1</i>   | B6 | 7.79E-06 | -2.2 | 9.29E-07 | -2.3 |
| NM_010591    | <i>Jun</i>      | B6 | 2.29E-15 | 3.7  | 1.01E-15 | 3.7  |
| NM_001286944 | <i>Jund</i>     | B6 | 1.05E-05 | 1.9  | 1.30E-03 | 1.6  |

|              |                 |    |          |      |          |      |
|--------------|-----------------|----|----------|------|----------|------|
| NM_001039347 | <i>Kcnd3</i>    | B6 | NS       | NS   | 4.03E-02 | -1.5 |
| NM_001081134 | <i>Kcng1</i>    | B6 | NS       | NS   | 1.73E-02 | -1.7 |
| NM_011317    | <i>Khdrbs1</i>  | B6 | 1.37E-02 | -1.5 | NS       | NS   |
| NM_010636    | <i>Klf12</i>    | B6 | NS       | NS   | 4.37E-02 | 1.3  |
| NM_078477    | <i>Klf16</i>    | B6 | 8.58E-03 | -1.7 | 5.13E-05 | -1.9 |
| NM_001081403 | <i>Klhl14</i>   | B6 | NS       | NS   | 1.25E-02 | -2.5 |
| NM_029436    | <i>Klhl24</i>   | B6 | 1.40E-02 | 1.4  | 1.52E-02 | 1.4  |
| NM_010655    | <i>Kpna2</i>    | B6 | 6.39E-04 | -1.6 | 3.49E-02 | -1.4 |
| NM_172787    | <i>L3mbtl3</i>  | B6 | 4.17E-02 | 1.4  | NS       | NS   |
| NM_001252658 | <i>Ldlr</i>     | B6 | 1.93E-04 | -2.3 | 5.95E-07 | -2.9 |
| NM_001199043 | <i>Lgals8</i>   | B6 | 4.56E-02 | 1.4  | NS       | NS   |
| NM_181074    | <i>Lingo1</i>   | B6 | NS       | NS   | 2.69E-02 | -1.3 |
| NM_001013758 | <i>Lingo3</i>   | B6 | NS       | NS   | 1.16E-02 | -1.6 |
| NM_001146048 | <i>Lrrc1</i>    | B6 | NS       | NS   | 4.23E-02 | 1.7  |
| NM_181470    | <i>Ltv1</i>     | B6 | NS       | NS   | 2.67E-02 | -1.7 |
| NM_001252055 | <i>Ly6c1</i>    | B6 | 4.09E-02 | 2.0  | NS       | NS   |
| NM_053201    | <i>Magee1</i>   | B6 | NS       | NS   | 3.59E-02 | -1.4 |
| NM_011948    | <i>Map3k4</i>   | B6 | NS       | NS   | 4.83E-02 | 1.5  |
| NM_001045483 | <i>Mapk1ip1</i> | B6 | 1.95E-02 | 1.4  | NS       | NS   |
| NM_011841    | <i>Mapk7</i>    | B6 | NS       | NS   | 5.74E-03 | -1.5 |
| NM_133350    | <i>Mapre3</i>   | B6 | NS       | NS   | 2.70E-02 | -1.4 |
| NM_175171    | <i>Mast4</i>    | B6 | NS       | NS   | 1.04E-03 | 1.5  |
| NM_008563    | <i>Mcm3</i>     | B6 | NS       | NS   | 3.49E-02 | -1.7 |
| NM_026896    | <i>Med27</i>    | B6 | NS       | NS   | 1.90E-02 | -1.4 |
| NM_001001979 | <i>Megf10</i>   | B6 | NS       | NS   | 8.10E-04 | 1.8  |
| NM_008587    | <i>Mertk</i>    | B6 | 1.31E-02 | 2.1  | 1.45E-02 | 2.0  |
| NM_026197    | <i>Mettl16</i>  | B6 | NS       | NS   | 2.66E-02 | -1.6 |
| NM_173870    | <i>Mgat4a</i>   | B6 | NS       | NS   | 2.80E-03 | 1.7  |
| NM_023799    | <i>Mgea5</i>    | B6 | 1.47E-02 | 1.3  | 2.03E-02 | 1.3  |
| NM_001166635 | <i>Mid1ip1</i>  | B6 | NS       | NS   | 4.04E-02 | -1.4 |
| NM_021565    | <i>Midn</i>     | B6 | 3.66E-02 | -1.4 | 4.37E-02 | -1.4 |
| NM_053164    | <i>Mrpl43</i>   | B6 | NS       | NS   | 3.03E-02 | -1.5 |
| NM_025436    | <i>Msmo1</i>    | B6 | 1.29E-05 | -2.2 | 2.33E-06 | -2.3 |
| NM_013602    | <i>Mt1</i>      | B6 | NS       | NS   | 2.98E-03 | 1.6  |
| NM_008630    | <i>Mt2</i>      | B6 | 1.09E-02 | 1.9  | 3.05E-05 | 2.5  |
| NM_001128601 | <i>Mthfsl</i>   | B6 | 1.41E-02 | 1.5  | NS       | NS   |
| NM_138656    | <i>Mvd</i>      | B6 | 1.93E-02 | -1.7 | 6.45E-05 | -2.1 |
| NM_001008542 | <i>Mxi1</i>     | B6 | 2.78E-08 | 1.9  | 6.67E-08 | 1.9  |

|              |                 |    |          |      |          |      |
|--------------|-----------------|----|----------|------|----------|------|
| NM_001171615 | <i>Myt1</i>     | B6 | NS       | NS   | 4.43E-02 | 1.5  |
| NM_172722    | <i>Naa25</i>    | B6 | NS       | NS   | 1.01E-02 | -1.6 |
| NM_026742    | <i>Ndufaf4</i>  | B6 | NS       | NS   | 1.16E-03 | -1.5 |
| NM_001111324 | <i>Nedd9</i>    | B6 | 3.06E-02 | 1.5  | NS       | NS   |
| NM_028995    | <i>Nipal3</i>   | B6 | 4.45E-02 | 1.6  | 6.69E-03 | 1.7  |
| NM_028024    | <i>Nkiras2</i>  | B6 | 3.53E-02 | 1.4  | NS       | NS   |
| NM_021303    | <i>Noc2l</i>    | B6 | NS       | NS   | 4.97E-03 | -1.5 |
| NM_009834    | <i>Noct</i>     | B6 | 2.62E-02 | -1.5 | NS       | NS   |
| NM_001008421 | <i>Nol10</i>    | B6 | NS       | NS   | 1.90E-02 | -1.6 |
| NM_138747    | <i>Nop2</i>     | B6 | 3.08E-02 | -1.4 | 2.03E-03 | -1.5 |
| NM_024193    | <i>Nop56</i>    | B6 | 9.68E-03 | -1.6 | 4.18E-02 | -1.5 |
| NM_018868    | <i>Nop58</i>    | B6 | NS       | NS   | 2.03E-02 | -1.4 |
| NM_001163684 | <i>Nosip</i>    | B6 | 4.32E-02 | 1.5  | NS       | NS   |
| NM_010342    | <i>Npbwr1</i>   | B6 | 7.58E-04 | 1.9  | 2.59E-03 | 1.8  |
| NM_016789    | <i>Nptx2</i>    | B6 | NS       | NS   | 1.98E-02 | -1.8 |
| NM_010941    | <i>Nsdhl</i>    | B6 | NS       | NS   | 1.73E-02 | -1.4 |
| NM_016968    | <i>Olig1</i>    | B6 | 1.93E-02 | -1.5 | 3.12E-02 | -1.4 |
| NM_152818    | <i>Osbp2</i>    | B6 | NS       | NS   | 2.64E-02 | 1.4  |
| NM_001134791 | <i>Osbpl9</i>   | B6 | 1.05E-02 | 1.3  | 1.32E-04 | 1.5  |
| NM_001285839 | <i>Osgepl1</i>  | B6 | 2.88E-02 | 1.6  | NS       | NS   |
| NM_146169    | <i>Paip2b</i>   | B6 | NS       | NS   | 3.32E-02 | 1.5  |
| NM_146129    | <i>Pcif1</i>    | B6 | NS       | NS   | 4.48E-02 | -1.5 |
| NM_183028    | <i>Pcmtd1</i>   | B6 | NS       | NS   | 2.76E-02 | 1.3  |
| NM_153594    | <i>Pcmtd2</i>   | B6 | 1.18E-02 | 1.7  | 1.29E-02 | 1.7  |
| NM_001177980 | <i>Pde4b</i>    | B6 | 1.05E-02 | 1.4  | NS       | NS   |
| NM_008808    | <i>Pdgfa</i>    | B6 | NS       | NS   | 1.42E-02 | -1.5 |
| NM_001159367 | <i>Per1</i>     | B6 | 2.32E-02 | 1.6  | NS       | NS   |
| NM_030064    | <i>Phf23</i>    | B6 | NS       | NS   | 3.64E-02 | -1.5 |
| NM_178149    | <i>Pik3ip1</i>  | B6 | 1.07E-06 | 2.5  | 6.45E-05 | 2.2  |
| NM_001024955 | <i>Pik3r1</i>   | B6 | 9.01E-09 | 1.8  | 7.75E-13 | 2.1  |
| NM_145478    | <i>Pim3</i>     | B6 | NS       | NS   | 4.05E-03 | -2.1 |
| NM_152813    | <i>Plcd3</i>    | B6 | 1.10E-02 | 1.8  | 2.86E-04 | 2.0  |
| NM_001033253 | <i>Plekhg1</i>  | B6 | 9.02E-05 | 2.0  | 1.39E-04 | 1.9  |
| NM_013807    | <i>Plk3</i>     | B6 | NS       | NS   | 3.41E-04 | -1.9 |
| NM_133249    | <i>Ppargc1b</i> | B6 | NS       | NS   | 4.63E-03 | -1.8 |
| NM_177782    | <i>Prex1</i>    | B6 | NS       | NS   | 4.56E-02 | -1.4 |
| NM_177698    | <i>Psd3</i>     | B6 | 9.35E-03 | 1.4  | NS       | NS   |
| NM_029494    | <i>Rab30</i>    | B6 | 3.85E-06 | 1.9  | 1.14E-06 | 1.9  |

|              |                 |    |          |      |          |      |
|--------------|-----------------|----|----------|------|----------|------|
| NM_001038621 | <i>Rabgap11</i> | B6 | 6.45E-05 | 1.5  | 4.58E-03 | 1.4  |
| NM_001099624 | <i>Rapgef2</i>  | B6 | 3.62E-05 | 1.6  | 1.52E-08 | 1.8  |
| NM_001252494 | <i>Rapgef6</i>  | B6 | 9.01E-09 | 2.4  | 3.88E-07 | 2.2  |
| NM_001176528 | <i>Rara</i>     | B6 | NS       | NS   | 9.80E-03 | -1.6 |
| NM_009025    | <i>Rasa3</i>    | B6 | NS       | NS   | 1.56E-03 | -1.7 |
| NM_028234    | <i>Rbm33</i>    | B6 | 6.23E-03 | 1.5  | NS       | NS   |
| NM_016846    | <i>Rgl1</i>     | B6 | 2.20E-02 | 1.4  | NS       | NS   |
| NM_153514    | <i>Rhobtb2</i>  | B6 | NS       | NS   | 4.84E-06 | -2.0 |
| NM_182929    | <i>Rims3</i>    | B6 | NS       | NS   | 4.15E-02 | -1.6 |
| NM_172612    | <i>Rnd1</i>     | B6 | NS       | NS   | 4.84E-04 | -1.8 |
| NM_001166553 | <i>Rnf145</i>   | B6 | NS       | NS   | 6.92E-04 | -1.5 |
| NM_194346    | <i>Rnf31</i>    | B6 | NS       | NS   | 2.19E-03 | -1.8 |
| NM_183263    | <i>Rnmtl1</i>   | B6 | NS       | NS   | 2.34E-02 | -1.6 |
| NM_001289921 | <i>Rorb</i>     | B6 | 2.64E-02 | 1.6  | NS       | NS   |
| NM_001043354 | <i>Rorb</i>     | B6 | 4.56E-02 | 1.7  | NS       | NS   |
| NM_001163461 | <i>Rpap2</i>    | B6 | 3.43E-02 | 1.5  | NS       | NS   |
| NM_146244    | <i>Rps6kl1</i>  | B6 | 6.33E-07 | 2.4  | 7.97E-04 | 1.9  |
| NM_001136227 | <i>Rtnk</i>     | B6 | NS       | NS   | 5.88E-03 | 1.7  |
| NM_172769    | <i>Sc5d</i>     | B6 | 1.31E-02 | -1.3 | NS       | NS   |
| NM_011521    | <i>Sdc4</i>     | B6 | 1.71E-02 | 2.0  | 6.43E-04 | 2.3  |
| NM_030261    | <i>Sesn3</i>    | B6 | NS       | NS   | 8.01E-03 | 1.4  |
| NM_001286538 | <i>Sigmar1</i>  | B6 | NS       | NS   | 4.47E-04 | -1.6 |
| NM_027921    | <i>Slc16a14</i> | B6 | 1.88E-02 | 1.5  | 9.64E-04 | 1.7  |
| NM_001029842 | <i>Slc16a6</i>  | B6 | NS       | NS   | 4.09E-02 | 1.9  |
| NM_080853    | <i>Slc17a6</i>  | B6 | 4.06E-02 | 1.6  | NS       | NS   |
| NM_001159593 | <i>Slc20a1</i>  | B6 | 1.10E-02 | -1.4 | 1.60E-04 | -1.6 |
| NM_011400    | <i>Slc2a1</i>   | B6 | 8.73E-03 | 1.8  | 7.88E-03 | 1.7  |
| NM_172479    | <i>Slc38a5</i>  | B6 | NS       | NS   | 9.84E-03 | -1.6 |
| NM_001199283 | <i>Slc43a2</i>  | B6 | 1.80E-03 | 1.7  | 4.30E-02 | 1.5  |
| NM_001081263 | <i>Slc44a5</i>  | B6 | 2.13E-03 | 1.6  | 2.07E-05 | 1.8  |
| NM_029643    | <i>Slc52a2</i>  | B6 | NS       | NS   | 7.26E-03 | -1.6 |
| NM_001038643 | <i>Slco3a1</i>  | B6 | 2.46E-02 | -1.4 | 3.38E-03 | -1.5 |
| NM_008539    | <i>Smad1</i>    | B6 | 3.08E-02 | 1.4  | NS       | NS   |
| NM_133697    | <i>Smim14</i>   | B6 | NS       | NS   | 3.12E-02 | 1.3  |
| NM_001177833 | <i>Smox</i>     | B6 | 2.98E-03 | 1.6  | NS       | NS   |
| NM_009224    | <i>Snrnp70</i>  | B6 | NS       | NS   | 1.80E-02 | -1.4 |
| NM_182927    | <i>Spred3</i>   | B6 | 1.10E-02 | -1.9 | 1.50E-03 | -2.1 |
| NM_011898    | <i>Spry4</i>    | B6 | 1.95E-02 | -1.8 | 2.80E-03 | -1.9 |

|              |                  |    |          |      |          |      |
|--------------|------------------|----|----------|------|----------|------|
| NM_009270    | <i>Sqle</i>      | B6 | 1.95E-02 | -1.5 | 1.90E-03 | -1.6 |
| NM_009272    | <i>Srm</i>       | B6 | 1.70E-02 | -1.4 | 4.78E-03 | -1.5 |
| NM_011358    | <i>Srsf2</i>     | B6 | 6.74E-03 | -1.5 | 5.74E-03 | -1.5 |
| NM_001195485 | <i>Srsf7</i>     | B6 | 2.03E-02 | -1.6 | 1.01E-02 | -1.6 |
| NM_011374    | <i>St8sia1</i>   | B6 | NS       | NS   | 5.75E-04 | 1.6  |
| NM_133774    | <i>Stard4</i>    | B6 | 2.39E-02 | -1.7 | 2.30E-03 | -1.8 |
| NM_019675    | <i>Stmn4</i>     | B6 | NS       | NS   | 3.38E-03 | 1.7  |
| NM_153563    | <i>Strip1</i>    | B6 | NS       | NS   | 3.59E-02 | -1.3 |
| NM_153399    | <i>Syne1</i>     | B6 | NS       | NS   | 1.15E-03 | 1.7  |
| NM_001040085 | <i>Sytl2</i>     | B6 | 6.82E-03 | 1.9  | NS       | NS   |
| NM_013763    | <i>Tbl2</i>      | B6 | 2.46E-03 | -1.6 | NS       | NS   |
| NM_145396    | <i>Tbl3</i>      | B6 | NS       | NS   | 3.36E-02 | -1.6 |
| NM_009381    | <i>Thrsp</i>     | B6 | NS       | NS   | 1.73E-02 | 1.7  |
| NM_174989    | <i>Ticam1</i>    | B6 | NS       | NS   | 1.52E-02 | 2.0  |
| NM_026617    | <i>Tmbim4</i>    | B6 | NS       | NS   | 2.41E-02 | 1.3  |
| NM_172476    | <i>Tmc7</i>      | B6 | 1.99E-02 | 1.5  | NS       | NS   |
| NM_175564    | <i>Tmem169</i>   | B6 | 3.13E-02 | 1.6  | NS       | NS   |
| NM_001160385 | <i>Tmem196</i>   | B6 | 3.63E-02 | 1.7  | NS       | NS   |
| NM_029384    | <i>Tmem238</i>   | B6 | NS       | NS   | 2.42E-02 | -1.6 |
| NM_133706    | <i>Tmem97</i>    | B6 | NS       | NS   | 6.78E-04 | -2.0 |
| NM_001161746 | <i>Tnfrsf12a</i> | B6 | NS       | NS   | 2.25E-02 | 1.8  |
| NM_001048267 | <i>Tnpa1</i>     | B6 | NS       | NS   | 7.78E-03 | 1.4  |
| NM_144812    | <i>Tnrc6b</i>    | B6 | 3.87E-02 | 1.5  | NS       | NS   |
| NM_001109748 | <i>Tomm40</i>    | B6 | 6.67E-03 | -1.4 | 2.64E-02 | -1.4 |
| NM_001039466 | <i>Trim46</i>    | B6 | NS       | NS   | 1.73E-02 | -1.5 |
| NM_001170912 | <i>Trim66</i>    | B6 | 1.95E-02 | 2.2  | NS       | NS   |
| NM_001127233 | <i>Trp53</i>     | B6 | NS       | NS   | 4.23E-02 | -1.4 |
| NM_021884    | <i>Tsg101</i>    | B6 | 3.66E-02 | -1.3 | NS       | NS   |
| NM_001252588 | <i>Tspan4</i>    | B6 | NS       | NS   | 2.59E-02 | -1.5 |
| NM_001009935 | <i>Txnip</i>     | B6 | 8.05E-07 | 4.1  | 2.55E-10 | 6.0  |
| NM_001015876 | <i>Tyw1</i>      | B6 | 4.56E-02 | 1.6  | NS       | NS   |
| NM_001163769 | <i>U2af1</i>     | B6 | 2.64E-02 | -1.5 | NS       | NS   |
| NM_001169576 | <i>Ube2h</i>     | B6 | 8.73E-03 | 1.5  | 2.61E-05 | 1.7  |
| NM_001145162 | <i>Ube2ql1</i>   | B6 | NS       | NS   | 4.18E-02 | -1.3 |
| NM_030724    | <i>Uck2</i>      | B6 | 3.66E-02 | -1.3 | 4.63E-03 | -1.4 |
| ENSMUST0000  |                  |    |          |      |          | -1.7 |
| 0053686      | <i>Uck2</i>      | B6 | NS       | NS   | 9.19E-03 |      |
| NM_009484    | <i>Uty</i>       | B6 | NS       | NS   | 4.11E-02 | -2.0 |



|              |                      |    |          |      |          |      |
|--------------|----------------------|----|----------|------|----------|------|
| NM_001039385 | <i>Vgf</i>           | B6 | NS       | NS   | 1.01E-02 | -2.0 |
| NM_001110015 | <i>Wdr36</i>         | B6 | NS       | NS   | 7.89E-03 | -1.5 |
| NM_172372    | <i>Wdr45</i>         | B6 | 2.39E-02 | 1.7  | NS       | NS   |
| NM_001005342 | <i>Ypel4</i>         | B6 | 1.57E-02 | 2.1  | 1.22E-04 | 2.6  |
| NM_027166    | <i>Ypel5</i>         | B6 | 4.50E-04 | 1.5  | 3.43E-05 | 1.6  |
| NM_028106    | <i>Zbed3</i>         | B6 | 1.68E-02 | 1.5  | NS       | NS   |
| NM_001115130 | <i>Zbtb44</i>        | B6 | 1.18E-02 | 1.4  | NS       | NS   |
| NM_178404    | <i>Zc3h6</i>         | B6 | 5.61E-04 | 1.7  | NS       | NS   |
| NM_001110309 | <i>Zfp426</i>        | B6 | 6.74E-03 | 1.6  | 5.88E-03 | 1.5  |
| NM_207255    | <i>Zfp532</i>        | B6 | NS       | NS   | 4.78E-02 | 1.4  |
| NM_001267583 | <i>Zfp811</i>        | B6 | NS       | NS   | 5.12E-03 | 1.6  |
| NM_001167944 | <i>Zkscan5</i>       | B6 | NS       | NS   | 3.59E-02 | 1.7  |
| NM_001252584 | <i>Zmynd8</i>        | B6 | NS       | NS   | 1.01E-02 | 1.6  |
| NM_001009818 | <i>-44450</i>        | D2 | 2.56E-02 | -1.2 | 1.86E-02 | -1.3 |
| NM_001113486 | <i>-44448</i>        | D2 | 1.17E-04 | -1.4 | NS       | NS   |
| NM_001033262 | <i>-44264</i>        | D2 | 1.56E-05 | -2.2 | NS       | NS   |
| NM_001166372 | <i>-44256</i>        | D2 | NS       | NS   | 1.87E-02 | 1.4  |
| NM_021446    | <i>0610007P14Rik</i> | D2 | 3.53E-02 | -1.3 | NS       | NS   |
| NM_027056    | <i>1700012P22Rik</i> | D2 | 2.50E-03 | 2.3  | NS       | NS   |
| NM_144953    | <i>1700019D03Rik</i> | D2 | 1.69E-02 | 1.6  | NS       | NS   |
| NM_029693    | <i>1700123K08Rik</i> | D2 | NS       | NS   | 4.03E-02 | 1.6  |
| NM_001163145 | <i>1810041L15Rik</i> | D2 | 1.02E-02 | -1.5 | NS       | NS   |
| NR_045177    | <i>2900055J20Rik</i> | D2 | 1.07E-03 | 1.7  | 2.47E-03 | 1.7  |
| NM_029113    | <i>4930447A16Rik</i> | D2 | 2.79E-02 | 1.9  | NS       | NS   |
| NM_029444    | <i>4930447C04Rik</i> | D2 | 5.89E-03 | 2.3  | NS       | NS   |
| NM_001166394 | <i>4931428F04Rik</i> | D2 | 1.28E-02 | -1.5 | NS       | NS   |
| NM_173771    | <i>4933406M09Rik</i> | D2 | 2.76E-02 | 1.7  | NS       | NS   |
| NM_001167925 | <i>A730017C20Rik</i> | D2 | 9.53E-04 | 1.3  | 1.53E-02 | 1.2  |
| NR_015488    | <i>A930003A15Rik</i> | D2 | 1.44E-03 | 2.1  | 7.41E-03 | 2.0  |
| NR_033609    | <i>A930017M01Rik</i> | D2 | 5.79E-03 | 1.7  | NS       | NS   |
| NM_030210    | <i>Aacs</i>          | D2 | 2.26E-06 | -1.9 | 6.06E-03 | -1.6 |
| NM_001128091 | <i>Aadacl2</i>       | D2 | NS       | NS   | 1.94E-02 | 1.8  |
| NM_013851    | <i>Abca8b</i>        | D2 | 3.01E-03 | 2.0  | 8.50E-03 | 1.9  |
| NM_015751    | <i>Abce1</i>         | D2 | 1.14E-02 | -1.3 | 1.88E-02 | -1.3 |
| NM_134130    | <i>Abhd3</i>         | D2 | 3.10E-03 | 1.8  | NS       | NS   |
| NM_133360    | <i>Acaca</i>         | D2 | 6.18E-03 | -1.4 | NS       | NS   |
| NM_178799    | <i>Acad12</i>        | D2 | 2.33E-02 | 1.7  | NS       | NS   |
| NM_144784    | <i>Acat1</i>         | D2 | 2.33E-02 | -1.2 | NS       | NS   |

|              |                 |    |          |      |          |      |
|--------------|-----------------|----|----------|------|----------|------|
| NM_009338    | <i>Acat2</i>    | D2 | 7.00E-05 | -1.7 | 1.98E-03 | -1.6 |
| NM_153151    | <i>Acat3</i>    | D2 | 3.74E-04 | -1.6 | 1.67E-02 | -1.4 |
| NM_133225    | <i>Acbd3</i>    | D2 | 4.93E-02 | -1.3 | NS       | NS   |
| NM_001199296 | <i>Acly</i>     | D2 | 2.82E-05 | -1.6 | 2.35E-02 | -1.3 |
| NM_025790    | <i>Acot13</i>   | D2 | 2.86E-02 | 1.3  | NS       | NS   |
| NM_001146057 | <i>Acot7</i>    | D2 | 1.17E-02 | -1.3 | NS       | NS   |
| NM_001205385 | <i>Actr3</i>    | D2 | 3.26E-02 | -1.2 | NS       | NS   |
| NM_001270996 | <i>Adam9</i>    | D2 | 1.57E-03 | 1.4  | NS       | NS   |
| NM_172845    | <i>Adamts4</i>  | D2 | 4.88E-02 | 1.5  | NS       | NS   |
| NM_001100606 | <i>Adat3</i>    | D2 | 1.21E-02 | -1.6 | NS       | NS   |
| NM_001163290 | <i>Adck3</i>    | D2 | NS       | NS   | 1.26E-02 | 1.7  |
| NM_009623    | <i>Adcy8</i>    | D2 | 4.48E-02 | -1.6 | NS       | NS   |
| NM_182928    | <i>Adm2</i>     | D2 | 3.55E-02 | 1.6  | NS       | NS   |
| NM_019822    | <i>Adrm1</i>    | D2 | 2.62E-02 | -1.4 | NS       | NS   |
| NM_001162939 | <i>Aen</i>      | D2 | NS       | NS   | 3.03E-02 | -1.6 |
| NM_027373    | <i>Afap1</i>    | D2 | 4.79E-02 | -1.3 | NS       | NS   |
| NM_178162    | <i>Agfg2</i>    | D2 | 2.13E-03 | -1.9 | 1.24E-03 | -2.0 |
| NM_026644    | <i>Agpat4</i>   | D2 | 3.36E-02 | 1.3  | NS       | NS   |
| NM_007428    | <i>Agt</i>      | D2 | 3.99E-02 | 2.5  | NS       | NS   |
| NM_146155    | <i>Ahdc1</i>    | D2 | 8.43E-03 | -1.8 | NS       | NS   |
| NM_001199330 | <i>AI987944</i> | D2 | 6.92E-04 | 1.6  | NS       | NS   |
| NM_001172146 | <i>Aimp2</i>    | D2 | 5.42E-04 | -1.9 | 5.51E-03 | -1.8 |
| NM_001177602 | <i>Ak4</i>      | D2 | 1.90E-03 | -1.7 | NS       | NS   |
| NM_017476    | <i>Akap8l</i>   | D2 | 9.61E-04 | 1.5  | NS       | NS   |
| NM_009658    | <i>Akr1b3</i>   | D2 | 7.37E-03 | -1.4 | 1.58E-02 | -1.4 |
| NM_001165894 | <i>Akt1</i>     | D2 | 2.85E-03 | -1.4 | NS       | NS   |
| NM_001276446 | <i>Alad</i>     | D2 | 7.37E-03 | -1.6 | NS       | NS   |
| NM_009657    | <i>Aldoc</i>    | D2 | 4.49E-02 | 1.3  | NS       | NS   |
| NM_133981    | <i>Alg9</i>     | D2 | 3.79E-02 | -1.3 | NS       | NS   |
| NM_025538    | <i>Alkbh7</i>   | D2 | 1.76E-04 | -1.7 | 4.38E-03 | -1.6 |
| NM_001081395 | <i>Amotl1</i>   | D2 | 2.70E-02 | 1.7  | NS       | NS   |
| NM_019764    | <i>Amotl2</i>   | D2 | NS       | NS   | 1.15E-02 | 1.8  |
| NM_001276301 | <i>Ampd3</i>    | D2 | 7.58E-04 | 1.9  | NS       | NS   |
| NM_028333    | <i>Angptl1</i>  | D2 | 1.33E-02 | 1.9  | NS       | NS   |
| NM_020581    | <i>Angptl4</i>  | D2 | 4.10E-02 | 1.7  | 2.45E-04 | 2.4  |
| NM_001024851 | <i>Ankrd34a</i> | D2 | 1.39E-04 | -2.3 | 2.62E-02 | -1.8 |
| NM_001128103 | <i>Ano3</i>     | D2 | 1.65E-03 | 2.2  | NS       | NS   |
| NM_001164679 | <i>Ano8</i>     | D2 | 3.83E-02 | -1.4 | NS       | NS   |

|              |                      |    |          |      |          |      |
|--------------|----------------------|----|----------|------|----------|------|
| NM_009680    | <i>Ap3b1</i>         | D2 | 4.42E-03 | 1.3  | NS       | NS   |
| NM_007460    | <i>Ap3d1</i>         | D2 | 1.08E-02 | -1.3 | NS       | NS   |
| NM_007461    | <i>Apba2</i>         | D2 | 6.18E-03 | -1.6 | NS       | NS   |
| NM_001109914 | <i>Apold1</i>        | D2 | 8.93E-03 | 1.8  | NS       | NS   |
| NM_007481    | <i>Arf6</i>          | D2 | 6.80E-03 | -1.3 | 1.20E-02 | -1.3 |
| NM_021493    | <i>Arhgap23</i>      | D2 | 3.05E-02 | -1.5 | NS       | NS   |
| NM_001289686 | <i>Arhgef3</i>       | D2 | 2.12E-03 | 1.5  | NS       | NS   |
| NM_001172205 | <i>Arid5a</i>        | D2 | 6.09E-03 | 2.0  | 2.81E-03 | 2.1  |
| NM_023598    | <i>Arid5b</i>        | D2 | 1.83E-03 | 1.6  | 7.23E-03 | 1.6  |
| NM_001025102 | <i>Arl14ep</i>       | D2 | 5.85E-03 | 1.3  | NS       | NS   |
| NM_0207231   | <i>Arl5c</i>         | D2 | 4.39E-02 | 1.7  | NS       | NS   |
| NM_001042591 | <i>Arrdc3</i>        | D2 | 4.62E-10 | 3.2  | 3.11E-08 | 2.9  |
| NM_001042592 | <i>Arrdc4</i>        | D2 | 7.05E-03 | 1.7  | 1.62E-03 | 1.9  |
| NM_026855    | <i>Arv1</i>          | D2 | NS       | NS   | 3.07E-02 | -1.6 |
| NM_007492    | <i>Arx</i>           | D2 | 4.15E-04 | -2.0 | NS       | NS   |
| NM_133346    | <i>Asb6</i>          | D2 | 3.54E-02 | -1.5 | NS       | NS   |
| NM_001287180 | <i>Atf4</i>          | D2 | 6.89E-04 | -1.6 | 5.51E-03 | -1.5 |
| NM_001081304 | <i>Atf6</i>          | D2 | 1.80E-03 | 1.5  | NS       | NS   |
| NM_017406    | <i>Atf6b</i>         | D2 | 1.37E-02 | -1.4 | NS       | NS   |
| NM_025770    | <i>Atg10</i>         | D2 | 3.21E-02 | 1.5  | NS       | NS   |
| NM_026217    | <i>Atg12</i>         | D2 | 7.69E-03 | 1.3  | 1.90E-02 | 1.3  |
| NM_001145879 | <i>Atp6ap1l</i>      | D2 | 4.78E-02 | 2.0  | NS       | NS   |
| NM_027855    | <i>Atraid</i>        | D2 | 6.11E-03 | 1.4  | NS       | NS   |
| NM_001199304 | <i>Atxn1</i>         | D2 | 4.86E-03 | 1.4  | NS       | NS   |
| NM_009125    | <i>Atxn2</i>         | D2 | 4.77E-02 | -1.3 | NS       | NS   |
| NM_016847    | <i>Avpr1a</i>        | D2 | 3.46E-07 | -2.7 | 2.95E-05 | -2.3 |
| NM_194347    | <i>AY358078</i>      | D2 | NS       | NS   | 4.15E-02 | -1.7 |
| NM_001122993 | <i>B3galt5</i>       | D2 | 7.84E-03 | 1.6  | 1.88E-02 | 1.6  |
| NM_029792    | <i>B3gat1</i>        | D2 | 7.60E-03 | -1.5 | NS       | NS   |
| NM_024256    | <i>B3gat3</i>        | D2 | 5.62E-03 | -1.5 | NS       | NS   |
| NM_001169114 | <i>B3gnt2</i>        | D2 | 1.54E-02 | 1.6  | NS       | NS   |
| NM_001159407 | <i>B3gnt5</i>        | D2 | 2.13E-03 | 1.7  | 1.18E-02 | 1.6  |
| ENSMUST0000  |                      |    |          |      |          | NS   |
| 0181156      | <i>B430202K04Rik</i> | D2 | 4.42E-02 | 1.5  | NS       |      |
| NM_001244617 | <i>B4galnt1</i>      | D2 | 1.01E-02 | -1.5 | NS       | NS   |
| NM_177897    | <i>B4galnt4</i>      | D2 | 1.11E-02 | -1.5 | NS       | NS   |
| NM_019835    | <i>B4galt5</i>       | D2 | 1.96E-04 | -1.6 | 3.69E-02 | -1.4 |
| NM_001045523 | <i>Bahd1</i>         | D2 | 4.36E-02 | -1.5 | NS       | NS   |

|              |                 |    |          |      |          |      |
|--------------|-----------------|----|----------|------|----------|------|
| NM_001038231 | <i>Banf1</i>    | D2 | 2.31E-02 | -1.4 | NS       | NS   |
| NM_027395    | <i>Basp1</i>    | D2 | 3.88E-02 | -1.4 | NS       | NS   |
| NM_001001182 | <i>Baz2b</i>    | D2 | 7.73E-03 | 1.5  | NS       | NS   |
| NM_175325    | <i>Bbs4</i>     | D2 | 1.92E-03 | 1.4  | NS       | NS   |
| NM_027444    | <i>Bbx</i>      | D2 | 1.01E-02 | 1.7  | NS       | NS   |
| NM_153161    | <i>BC037034</i> | D2 | NS       | NS   | 3.43E-02 | -1.4 |
| NM_001164369 | <i>Bcas1</i>    | D2 | 2.01E-02 | 2.3  | NS       | NS   |
| NM_007534    | <i>Bcl2a1b</i>  | D2 | NS       | NS   | 3.57E-02 | 1.8  |
| NM_001289716 | <i>Bcl2l1</i>   | D2 | 2.15E-02 | -1.4 | NS       | NS   |
| NM_001284410 | <i>Bcl2l11</i>  | D2 | 1.86E-05 | 2.5  | 8.20E-05 | 2.4  |
| NM_029933    | <i>Bcl9</i>     | D2 | 5.00E-03 | -1.3 | NS       | NS   |
| NM_001122683 | <i>Bdh1</i>     | D2 | 7.56E-05 | -1.5 | 1.51E-03 | -1.5 |
| NM_001141922 | <i>Bean1</i>    | D2 | 2.67E-02 | -1.4 | NS       | NS   |
| NM_009751    | <i>Bfsp1</i>    | D2 | 2.25E-02 | -2.0 | NS       | NS   |
| NM_021560    | <i>Bhlhe22</i>  | D2 | 1.29E-02 | -1.7 | NS       | NS   |
| NM_173404    | <i>Bmp3</i>     | D2 | 1.11E-02 | -1.7 | NS       | NS   |
| NM_013481    | <i>Bop1</i>     | D2 | 5.40E-03 | -1.6 | NS       | NS   |
| NM_026396    | <i>Brix1</i>    | D2 | 2.82E-02 | -1.4 | NS       | NS   |
| NM_133889    | <i>Bsdc1</i>    | D2 | NS       | NS   | 2.81E-03 | 1.4  |
| NM_007570    | <i>Btg2</i>     | D2 | 8.65E-08 | 2.6  | 4.88E-06 | 2.3  |
| NM_009770    | <i>Btg3</i>     | D2 | 2.76E-02 | 1.6  | 3.35E-03 | 1.9  |
| NM_016859    | <i>Bysl</i>     | D2 | 9.03E-04 | -1.8 | NS       | NS   |
| NM_007573    | <i>C1qbp</i>    | D2 | 1.93E-03 | -1.4 | NS       | NS   |
| NM_183175    | <i>C1qtnf9</i>  | D2 | 3.88E-02 | 1.5  | NS       | NS   |
| NM_009779    | <i>C3ar1</i>    | D2 | 9.79E-03 | 1.8  | NS       | NS   |
| NM_001252533 | <i>Cacnb2</i>   | D2 | 9.79E-03 | 1.4  | NS       | NS   |
| NM_019431    | <i>Cacng4</i>   | D2 | 4.48E-02 | -1.3 | NS       | NS   |
| NM_001025600 | <i>Cadm1</i>    | D2 | 2.67E-02 | -1.5 | NS       | NS   |
| NM_009788    | <i>Calb1</i>    | D2 | NS       | NS   | 7.23E-03 | -1.7 |
| NM_026192    | <i>Calcoco1</i> | D2 | 4.08E-02 | 1.4  | NS       | NS   |
| NM_144817    | <i>Camk1g</i>   | D2 | 3.57E-04 | -1.6 | 2.95E-05 | -1.7 |
| NM_001163749 | <i>Camsap3</i>  | D2 | 7.21E-04 | -1.6 | NS       | NS   |
| NM_001111289 | <i>Caprin1</i>  | D2 | 2.82E-02 | -1.3 | NS       | NS   |
| NM_025821    | <i>Carhsp1</i>  | D2 | 5.31E-03 | 1.7  | NS       | NS   |
| NM_021531    | <i>Carm1</i>    | D2 | 7.37E-03 | -1.3 | NS       | NS   |
| NM_027937    | <i>Caskin1</i>  | D2 | 2.15E-02 | -1.4 | NS       | NS   |
| NM_001159344 | <i>Casz1</i>    | D2 | 2.62E-02 | -1.6 | NS       | NS   |
| NM_019626    | <i>Cbln1</i>    | D2 | 3.48E-02 | -2.0 | NS       | NS   |

|              |                 |    |          |      |          |      |
|--------------|-----------------|----|----------|------|----------|------|
| NM_172633    | <i>Cbln2</i>    | D2 | 1.29E-02 | -1.9 | NS       | NS   |
| NM_173047    | <i>Cbr3</i>     | D2 | 2.05E-02 | -1.5 | 6.49E-03 | -1.6 |
| NM_001271353 | <i>Cbs</i>      | D2 | 2.46E-02 | 1.4  | NS       | NS   |
| NM_007625    | <i>Cbx4</i>     | D2 | 7.70E-03 | -1.4 | NS       | NS   |
| NM_173763    | <i>Ccbl2</i>    | D2 | 1.13E-02 | 2.0  | NS       | NS   |
| NM_207202    | <i>Ccdc120</i>  | D2 | 2.94E-02 | -1.5 | NS       | NS   |
| NM_001025576 | <i>Ccdc141</i>  | D2 | 2.04E-02 | 1.9  | NS       | NS   |
| NM_177716    | <i>Ccdc184</i>  | D2 | 1.72E-06 | -2.0 | NS       | NS   |
| NM_144820    | <i>Ccdc28a</i>  | D2 | NS       | NS   | 2.56E-03 | 2.1  |
| NM_025602    | <i>Ccdc59</i>   | D2 | NS       | NS   | 3.03E-02 | -1.6 |
| NM_207268    | <i>Ccdc87</i>   | D2 | 2.12E-03 | -2.1 | NS       | NS   |
| NM_011338    | <i>Ccl9</i>     | D2 | 3.31E-02 | 1.9  | NS       | NS   |
| NM_007631    | <i>Ccnd1</i>    | D2 | 8.16E-04 | -1.6 | 2.81E-03 | -1.6 |
| NM_009831    | <i>Ccng1</i>    | D2 | 2.30E-03 | 1.4  | NS       | NS   |
| NM_001114328 | <i>CcpG1</i>    | D2 | 9.00E-03 | 1.5  | NS       | NS   |
| NM_153098    | <i>Cd109</i>    | D2 | 2.34E-02 | 1.7  | NS       | NS   |
| NM_026956    | <i>Cd209f</i>   | D2 | 4.41E-02 | -2.0 | NS       | NS   |
| NM_009846    | <i>Cd24a</i>    | D2 | 3.84E-02 | -1.6 | NS       | NS   |
| NM_001111058 | <i>Cd33</i>     | D2 | 3.91E-02 | 1.8  | NS       | NS   |
| NM_007646    | <i>Cd38</i>     | D2 | 1.61E-02 | 1.9  | NS       | NS   |
| NM_013488    | <i>Cd4</i>      | D2 | 1.23E-02 | 3.1  | NS       | NS   |
| NM_025584    | <i>Cd99</i>     | D2 | 2.28E-03 | -1.8 | NS       | NS   |
| NM_026772    | <i>Cdc42ep2</i> | D2 | 9.75E-04 | -1.8 | NS       | NS   |
| NM_009865    | <i>Cdh10</i>    | D2 | NS       | NS   | 3.06E-02 | -1.4 |
| NM_001168304 | <i>Cdk19</i>    | D2 | 1.14E-02 | 1.4  | NS       | NS   |
| NM_009872    | <i>Cdk5r2</i>   | D2 | 1.35E-04 | -1.9 | NS       | NS   |
| NM_009874    | <i>Cdk7</i>     | D2 | NS       | NS   | 2.84E-02 | -1.5 |
| NM_183294    | <i>Cdkl1</i>    | D2 | 4.08E-02 | 1.4  | NS       | NS   |
| NM_001080929 | <i>Cdr2l</i>    | D2 | 2.33E-02 | -1.7 | NS       | NS   |
| NM_026014    | <i>Cdt1</i>     | D2 | 4.91E-02 | -1.5 | NS       | NS   |
| NM_001134426 | <i>Cdv3</i>     | D2 | 5.30E-03 | -1.3 | 1.93E-02 | -1.3 |
| NM_001039185 | <i>Ceacam1</i>  | D2 | 2.17E-02 | 1.9  | NS       | NS   |
| NM_001159364 | <i>Cep97</i>    | D2 | 4.25E-02 | 1.5  | NS       | NS   |
| NM_009891    | <i>Chat</i>     | D2 | 5.95E-03 | 1.5  | NS       | NS   |
| NM_133928    | <i>Chchd4</i>   | D2 | 1.49E-02 | -1.7 | NS       | NS   |
| NM_001081345 | <i>Chd2</i>     | D2 | 1.30E-03 | 1.6  | NS       | NS   |
| NM_021350    | <i>Chml</i>     | D2 | 2.82E-02 | -1.5 | NS       | NS   |
| NM_001114385 | <i>Chrdl1</i>   | D2 | 5.72E-03 | -1.7 | NS       | NS   |

|              |                 |    |          |      |          |      |
|--------------|-----------------|----|----------|------|----------|------|
| NM_029935    | <i>Chst15</i>   | D2 | 3.43E-02 | -1.4 | NS       | NS   |
| NM_001289429 | <i>Cipc</i>     | D2 | 1.30E-02 | -1.3 | NS       | NS   |
| NM_016680    | <i>Clasrp</i>   | D2 | NS       | NS   | 2.17E-02 | -1.5 |
| NM_001177770 | <i>Clcc1</i>    | D2 | 8.97E-03 | 1.7  | NS       | NS   |
| NM_001243762 | <i>Clcn5</i>    | D2 | 1.20E-03 | 1.7  | 4.08E-02 | 1.5  |
| NM_001160096 | <i>Cldn10</i>   | D2 | 8.82E-03 | 1.6  | NS       | NS   |
| NM_001033175 | <i>Cln6</i>     | D2 | 9.60E-03 | 1.5  | NS       | NS   |
| NM_153384    | <i>Clrn1</i>    | D2 | NS       | NS   | 2.62E-03 | 1.9  |
| NM_025647    | <i>Cmpk1</i>    | D2 | 4.98E-02 | -1.3 | NS       | NS   |
| NM_026066    | <i>Cmtm5</i>    | D2 | 4.19E-02 | 1.3  | NS       | NS   |
| NM_177751    | <i>Cnksr2</i>   | D2 | 2.49E-02 | 1.4  | NS       | NS   |
| NM_007726    | <i>Cnr1</i>     | D2 | 1.61E-02 | -1.4 | NS       | NS   |
| NM_130457    | <i>Cntnap4</i>  | D2 | 4.61E-03 | -1.6 | NS       | NS   |
| NM_001198835 | <i>Coch</i>     | D2 | 1.16E-03 | -2.0 | NS       | NS   |
| NM_146211    | <i>Colgalt1</i> | D2 | 4.61E-02 | -1.4 | NS       | NS   |
| NM_026965    | <i>Comtd1</i>   | D2 | 3.73E-02 | -1.3 | NS       | NS   |
| NM_001039710 | <i>Coq10b</i>   | D2 | 2.99E-02 | -1.5 | NS       | NS   |
| NM_009898    | <i>Coro1a</i>   | D2 | 1.11E-02 | -1.7 | 2.75E-02 | -1.6 |
| NM_178379    | <i>Cox10</i>    | D2 | 1.16E-02 | -1.5 | NS       | NS   |
| NM_001033310 | <i>Cox18</i>    | D2 | 7.57E-03 | -1.4 | NS       | NS   |
| NM_001252525 | <i>Cpeb1</i>    | D2 | 5.99E-04 | 2.2  | 1.62E-03 | 2.2  |
| NM_016856    | <i>Cpsf2</i>    | D2 | NS       | NS   | 4.85E-02 | -1.3 |
| NM_013499    | <i>Cr1l</i>     | D2 | 2.07E-02 | 1.4  | NS       | NS   |
| NM_007758    | <i>Cr2</i>      | D2 | 4.55E-02 | -1.7 | NS       | NS   |
| NM_011957    | <i>Creb3l1</i>  | D2 | 8.40E-03 | -1.9 | 2.82E-02 | -1.9 |
| NM_172728    | <i>Creb5</i>    | D2 | 3.98E-03 | 1.9  | 1.33E-04 | 2.3  |
| NM_001110850 | <i>Crem</i>     | D2 | 2.39E-05 | 2.1  | 2.95E-05 | 2.1  |
| NM_007762    | <i>Crhr1</i>    | D2 | 9.18E-09 | -2.9 | 3.85E-03 | -1.9 |
| NM_024223    | <i>Crip2</i>    | D2 | 3.14E-02 | -1.4 | NS       | NS   |
| NM_016669    | <i>Crym</i>     | D2 | 1.19E-04 | -1.6 | NS       | NS   |
| NM_023565    | <i>Cse1l</i>    | D2 | 3.04E-03 | -1.4 | 4.61E-02 | -1.3 |
| NM_001037859 | <i>Csf1r</i>    | D2 | 1.96E-02 | 1.5  | NS       | NS   |
| NM_007783    | <i>Csk</i>      | D2 | 4.55E-02 | -1.5 | NS       | NS   |
| NM_153407    | <i>Csrnp2</i>   | D2 | 1.67E-02 | -1.5 | NS       | NS   |
| NM_153409    | <i>Csrnp3</i>   | D2 | 2.66E-02 | 1.3  | NS       | NS   |
| NM_007791    | <i>Csrp1</i>    | D2 | 1.83E-02 | 1.6  | NS       | NS   |
| NM_177655    | <i>Cstl1</i>    | D2 | 1.63E-02 | 1.8  | NS       | NS   |
| NM_001170744 | <i>Ctbp2</i>    | D2 | 2.94E-02 | -1.4 | NS       | NS   |

|              |                      |    |          |      |          |      |
|--------------|----------------------|----|----------|------|----------|------|
| NM_001145799 | <i>Ctla2a</i>        | D2 | 3.89E-02 | 1.6  | NS       | NS   |
| NM_031251    | <i>Ctns</i>          | D2 | NS       | NS   | 6.49E-03 | 1.5  |
| NM_016748    | <i>Ctps</i>          | D2 | 9.21E-03 | -1.5 | NS       | NS   |
| NM_007799    | <i>Ctse</i>          | D2 | 1.69E-02 | 1.7  | NS       | NS   |
| NM_019861    | <i>Ctsf</i>          | D2 | 2.28E-02 | 1.4  | NS       | NS   |
| NM_001163332 | <i>Cttnbp2nl</i>     | D2 | 3.16E-02 | -1.4 | NS       | NS   |
| NM_153775    | <i>Ctu2</i>          | D2 | 1.54E-04 | -2.1 | NS       | NS   |
| NM_029402    | <i>Cul2</i>          | D2 | 1.42E-02 | -1.4 | NS       | NS   |
| NM_009987    | <i>Cx3cr1</i>        | D2 | 3.42E-02 | 1.4  | NS       | NS   |
| NM_009911    | <i>Cxcr4</i>         | D2 | 1.40E-02 | -1.7 | 1.51E-02 | -1.7 |
| NM_133687    | <i>Cxxc5</i>         | D2 | 4.18E-02 | -1.5 | NS       | NS   |
| NM_025567    | <i>Cyc1</i>          | D2 | 3.39E-02 | -1.4 | NS       | NS   |
| NM_010008    | <i>Cyp2j6</i>        | D2 | 1.20E-03 | 1.6  | NS       | NS   |
| NM_028979    | <i>Cyp2j9</i>        | D2 | 9.98E-05 | 2.1  | 4.30E-03 | 1.9  |
| NM_130882    | <i>Cyp4f13</i>       | D2 | 2.40E-02 | 1.6  | NS       | NS   |
| NM_001204333 | <i>Cyp4f14</i>       | D2 | 3.55E-02 | 1.7  | NS       | NS   |
| NM_020010    | <i>Cyp51</i>         | D2 | 1.30E-06 | -1.7 | 3.46E-06 | -1.7 |
| NM_010516    | <i>Cyr61</i>         | D2 | 5.50E-04 | 1.9  | NS       | NS   |
| NM_001004455 | <i>Cys1</i>          | D2 | NS       | NS   | 2.75E-02 | 1.7  |
| NM_001163548 | <i>Cyth3</i>         | D2 | 3.14E-02 | -1.3 | NS       | NS   |
| NM_194061    | <i>D630045J12Rik</i> | D2 | 1.34E-02 | -1.5 | NS       | NS   |
| NM_001190473 | <i>Dapk3</i>         | D2 | 2.67E-02 | -1.4 | NS       | NS   |
| NM_001177371 | <i>Dbn1</i>          | D2 | 2.50E-02 | -1.4 | NS       | NS   |
| NM_001146308 | <i>Dbnl</i>          | D2 | 7.01E-03 | -1.5 | NS       | NS   |
| NM_153555    | <i>Dcaf8</i>         | D2 | 2.27E-02 | 1.3  | NS       | NS   |
| NM_025600    | <i>Dda1</i>          | D2 | 2.90E-02 | -1.2 | NS       | NS   |
| NM_007837    | <i>Ddit3</i>         | D2 | NS       | NS   | 2.95E-02 | 1.7  |
| NM_025860    | <i>Ddx18</i>         | D2 | 4.76E-02 | -1.4 | NS       | NS   |
| NM_019553    | <i>Ddx21</i>         | D2 | 9.59E-03 | -1.5 | NS       | NS   |
| NM_197982    | <i>Ddx39</i>         | D2 | 3.99E-02 | -1.7 | 2.90E-02 | -1.8 |
| NM_001252457 | <i>Ddx39b</i>        | D2 | 1.48E-02 | -1.3 | NS       | NS   |
| NM_001282055 | <i>Ddx46</i>         | D2 | 6.22E-03 | -1.5 | 3.17E-03 | -1.6 |
| NM_053183    | <i>Ddx50</i>         | D2 | 1.24E-02 | -1.4 | 5.42E-03 | -1.5 |
| NM_027156    | <i>Ddx51</i>         | D2 | 4.01E-02 | -1.7 | NS       | NS   |
| NM_028041    | <i>Ddx54</i>         | D2 | 3.04E-04 | -1.7 | NS       | NS   |
| NM_011933    | <i>Decr2</i>         | D2 | 2.36E-02 | 1.4  | 3.03E-02 | 1.4  |
| NM_007853    | <i>Degs1</i>         | D2 | 7.47E-03 | 1.4  | NS       | NS   |
| NM_010046    | <i>Dgat1</i>         | D2 | 4.27E-02 | -1.7 | NS       | NS   |

|              |                      |    |          |      |          |      |
|--------------|----------------------|----|----------|------|----------|------|
| NM_053272    | <i>Dhcr24</i>        | D2 | 2.86E-11 | -1.9 | 9.51E-11 | -1.9 |
| NM_026819    | <i>Dhrs1</i>         | D2 | 9.21E-03 | 1.4  | NS       | NS   |
| NM_172594    | <i>Dhx29</i>         | D2 | 4.36E-02 | -1.3 | NS       | NS   |
| NM_001252682 | <i>Dhx30</i>         | D2 | 7.37E-03 | -1.4 | NS       | NS   |
| NM_026191    | <i>Dhx40</i>         | D2 | 3.71E-02 | 1.4  | NS       | NS   |
| NM_007842    | <i>Dhx9</i>          | D2 | NS       | NS   | 7.86E-05 | -1.5 |
| NM_020265    | <i>Dkk2</i>          | D2 | NS       | NS   | 1.83E-02 | -1.9 |
| NM_001042487 | <i>Dlgap4</i>        | D2 | 1.34E-02 | -1.4 | NS       | NS   |
| NM_001286013 | <i>Dlk2</i>          | D2 | 3.52E-02 | -1.6 | NS       | NS   |
| NM_007865    | <i>Dll1</i>          | D2 | 1.75E-02 | -1.6 | NS       | NS   |
| NR_002854    | <i>Dlx1as</i>        | D2 | 3.03E-03 | -2.1 | 4.10E-03 | -2.1 |
| NM_010058    | <i>Dmwd</i>          | D2 | 2.10E-02 | -1.4 | NS       | NS   |
| NM_018808    | <i>Dnaja1</i>        | D2 | NS       | NS   | 4.47E-02 | -1.4 |
| NM_025926    | <i>Dnaja4</i>        | D2 | 1.89E-04 | 1.5  | 3.78E-03 | 1.5  |
| NM_001099738 | <i>Dnaja2</i>        | D2 | 8.07E-03 | 1.8  | NS       | NS   |
| NM_152915    | <i>Dner</i>          | D2 | 9.09E-03 | -1.3 | NS       | NS   |
| NM_001199431 | <i>Dnmt1</i>         | D2 | 1.11E-02 | -1.6 | NS       | NS   |
| NM_053246    | <i>Dok4</i>          | D2 | NS       | NS   | 4.67E-02 | -1.3 |
| NM_020329    | <i>Dolpp1</i>        | D2 | 3.21E-02 | -1.6 | NS       | NS   |
| NM_172639    | <i>Dpcd</i>          | D2 | 3.05E-02 | -1.4 | NS       | NS   |
| NM_013874    | <i>Dpfl</i>          | D2 | 6.92E-04 | -2.0 | 8.30E-03 | -1.8 |
| NM_023047    | <i>Dpysl5</i>        | D2 | 1.97E-02 | -1.3 | NS       | NS   |
| NM_023842    | <i>Dsp</i>           | D2 | 2.54E-02 | 1.8  | NS       | NS   |
| NM_001285807 | <i>Dtna</i>          | D2 | 7.83E-06 | 1.5  | 2.58E-04 | 1.4  |
| NM_008052    | <i>Dtx1</i>          | D2 | 1.11E-02 | -1.4 | NS       | NS   |
| NM_172442    | <i>Dtx4</i>          | D2 | NS       | NS   | 9.41E-03 | 1.4  |
| NM_013642    | <i>Dusp1</i>         | D2 | 1.82E-05 | 2.0  | 6.36E-07 | 2.3  |
| NM_023173    | <i>Dusp12</i>        | D2 | 2.19E-04 | -1.8 | NS       | NS   |
| NM_019819    | <i>Dusp14</i>        | D2 | 2.66E-02 | 1.6  | NS       | NS   |
| NM_001048054 | <i>Dusp16</i>        | D2 | 5.42E-04 | 1.9  | 3.59E-03 | 1.9  |
| NM_176933    | <i>Dusp4</i>         | D2 | 1.64E-07 | -2.5 | 1.58E-03 | -1.9 |
| NM_001085390 | <i>Dusp5</i>         | D2 | 2.76E-02 | -1.6 | NS       | NS   |
| NM_026268    | <i>Dusp6</i>         | D2 | 1.01E-04 | -1.9 | 2.57E-04 | -1.9 |
| NM_153459    | <i>Dusp7</i>         | D2 | 4.31E-04 | -2.0 | NS       | NS   |
| NM_008748    | <i>Dusp8</i>         | D2 | 4.14E-05 | 1.5  | 1.67E-06 | 1.6  |
| NM_019682    | <i>Dynll1</i>        | D2 | 4.13E-02 | -1.3 | NS       | NS   |
| NM_001037957 | <i>Dyrk1b</i>        | D2 | 2.53E-02 | 1.3  | NS       | NS   |
| NM_177856    | <i>E130311K13Rik</i> | D2 | 3.97E-02 | 1.6  | NS       | NS   |



|              |                 |    |          |      |          |      |
|--------------|-----------------|----|----------|------|----------|------|
| NM_148952    | <i>E2f4</i>     | D2 | 1.05E-02 | -1.6 | NS       | NS   |
| NM_007893    | <i>E4f1</i>     | D2 | NS       | NS   | 2.76E-02 | -1.5 |
| NM_025380    | <i>Eef1e1</i>   | D2 | 6.11E-03 | -1.4 | 3.43E-02 | -1.4 |
| NM_026007    | <i>Eef1g</i>    | D2 | 1.71E-02 | -1.3 | NS       | NS   |
| NM_007909    | <i>Efna2</i>    | D2 | 7.01E-03 | -1.6 | NS       | NS   |
| NM_010108    | <i>Efna3</i>    | D2 | 1.13E-04 | -1.6 | NS       | NS   |
| NM_010111    | <i>Efnb2</i>    | D2 | 4.26E-02 | -1.4 | NS       | NS   |
| NM_007911    | <i>Efnb3</i>    | D2 | 4.70E-04 | -1.6 | NS       | NS   |
| NM_001082483 | <i>Efr3b</i>    | D2 | 2.69E-03 | -1.4 | NS       | NS   |
| NM_053208    | <i>Egln2</i>    | D2 | 1.31E-02 | -1.4 | NS       | NS   |
| NM_001289925 | <i>Egr3</i>     | D2 | 2.38E-05 | -2.3 | 1.12E-07 | -2.9 |
| NM_018781    | <i>Egr3</i>     | D2 | NS       | NS   | 5.98E-03 | -1.9 |
| NM_026892    | <i>Eif1b</i>    | D2 | 4.23E-02 | -1.3 | NS       | NS   |
| NM_010121    | <i>Eif2ak3</i>  | D2 | 3.91E-02 | 1.4  | 1.00E-02 | 1.6  |
| NM_018749    | <i>Eif3d</i>    | D2 | 3.51E-02 | -1.4 | 2.75E-02 | -1.4 |
| NM_001159375 | <i>Eif4a1</i>   | D2 | 2.94E-02 | -1.3 | NS       | NS   |
| NM_138669    | <i>Eif4a3</i>   | D2 | NS       | NS   | 1.64E-02 | -1.4 |
| NM_007917    | <i>Eif4e</i>    | D2 | NS       | NS   | 2.03E-02 | -1.3 |
| NM_145941    | <i>Eif4g1</i>   | D2 | 1.51E-02 | -1.3 | 4.45E-03 | -1.3 |
| NM_177586    | <i>Eif5a2</i>   | D2 | NS       | NS   | 3.71E-02 | -1.4 |
| NM_023479    | <i>Elac2</i>    | D2 | 4.74E-02 | -1.4 | NS       | NS   |
| NM_001177883 | <i>Elavl2</i>   | D2 | 4.49E-04 | -1.5 | NS       | NS   |
| NM_175522    | <i>Elfn1</i>    | D2 | 7.05E-03 | -1.8 | 1.35E-02 | -1.8 |
| NM_001253692 | <i>Elmod3</i>   | D2 | 2.67E-02 | 1.4  | NS       | NS   |
| NM_130450    | <i>Elovl6</i>   | D2 | 7.73E-03 | -1.4 | 2.47E-03 | -1.5 |
| NM_198299    | <i>Enkd1</i>    | D2 | 2.96E-02 | -1.5 | NS       | NS   |
| NM_001168620 | <i>Enpp5</i>    | D2 | 5.50E-04 | 1.5  | NS       | NS   |
| NM_177304    | <i>Enpp6</i>    | D2 | 3.97E-02 | 2.5  | NS       | NS   |
| NM_175313    | <i>Eogt</i>     | D2 | 1.21E-02 | 1.5  | NS       | NS   |
| NM_013512    | <i>Epb41l4a</i> | D2 | 2.28E-03 | -1.5 | NS       | NS   |
| NM_134065    | <i>Epdrr1</i>   | D2 | 3.04E-03 | 1.6  | NS       | NS   |
| NM_010140    | <i>Epha3</i>    | D2 | 2.49E-02 | -1.4 | NS       | NS   |
| NM_010143    | <i>Ephb3</i>    | D2 | 4.17E-02 | -1.6 | NS       | NS   |
| NM_175266    | <i>Epm2aip1</i> | D2 | 4.10E-02 | -1.3 | NS       | NS   |
| NM_001005868 | <i>Erbp2ip</i>  | D2 | 5.24E-03 | 1.5  | NS       | NS   |
| NM_028042    | <i>Ercc8</i>    | D2 | 1.23E-03 | -1.8 | NS       | NS   |
| NM_133659    | <i>Erg</i>      | D2 | NS       | NS   | 4.15E-02 | -1.6 |
| NM_028039    | <i>Esco2</i>    | D2 | NS       | NS   | 1.90E-02 | -2.0 |

|              |                 |    |          |      |          |      |
|--------------|-----------------|----|----------|------|----------|------|
| NM_029250    | <i>Etnk1</i>    | D2 | 3.14E-02 | 1.3  | NS       | NS   |
| NM_001038642 | <i>Ets1</i>     | D2 | NS       | NS   | 3.72E-02 | -1.5 |
| NM_008815    | <i>Etv4</i>     | D2 | 2.28E-05 | -1.9 | 4.97E-04 | -1.8 |
| NM_023794    | <i>Etv5</i>     | D2 | 1.31E-05 | -2.1 | 5.98E-03 | -1.7 |
| NM_145570    | <i>Eva1a</i>    | D2 | 9.21E-03 | 1.6  | NS       | NS   |
| NM_177077    | <i>Exoc6b</i>   | D2 | 2.25E-02 | -1.4 | NS       | NS   |
| NM_175399    | <i>Exosc4</i>   | D2 | 1.24E-02 | -1.7 | NS       | NS   |
| NM_028274    | <i>Exosc6</i>   | D2 | 3.52E-02 | -1.2 | NS       | NS   |
| NM_001163514 | <i>Extl2</i>    | D2 | 8.09E-03 | 1.5  | NS       | NS   |
| NM_027980    | <i>Faap100</i>  | D2 | 1.75E-02 | -1.4 | NS       | NS   |
| NM_183187    | <i>Fam107a</i>  | D2 | 2.75E-14 | 7.8  | 2.20E-09 | 4.8  |
| NM_001085513 | <i>Fam131c</i>  | D2 | 4.46E-06 | -2.3 | NS       | NS   |
| NM_001034851 | <i>Fam134b</i>  | D2 | 2.39E-05 | 1.6  | 3.72E-02 | 1.3  |
| NM_153574    | <i>Fam13a</i>   | D2 | 1.24E-02 | 1.7  | NS       | NS   |
| NM_001159743 | <i>Fam150b</i>  | D2 | NS       | NS   | 4.44E-02 | -1.8 |
| NM_177838    | <i>Fam163a</i>  | D2 | 1.90E-03 | -1.6 | 4.62E-02 | -1.5 |
| NM_001081161 | <i>Fam171a1</i> | D2 | 1.51E-03 | -1.6 | NS       | NS   |
| NM_182808    | <i>Fam19a1</i>  | D2 | 1.39E-04 | 1.7  | NS       | NS   |
| NM_030565    | <i>Fam20c</i>   | D2 | 3.31E-04 | -1.7 | NS       | NS   |
| NM_001113283 | <i>Fam214a</i>  | D2 | NS       | NS   | 1.88E-02 | 1.6  |
| NM_178908    | <i>Fam26e</i>   | D2 | 3.63E-06 | 2.3  | 7.61E-06 | 2.3  |
| NM_175104    | <i>Fam53c</i>   | D2 | 1.20E-03 | 1.9  | 2.05E-02 | 1.7  |
| NM_001160261 | <i>Fam78b</i>   | D2 | 3.82E-02 | -1.4 | NS       | NS   |
| NM_029007    | <i>Fam84a</i>   | D2 | 7.37E-03 | -1.5 | NS       | NS   |
| NM_026635    | <i>Fam96a</i>   | D2 | 4.31E-02 | 1.4  | NS       | NS   |
| NM_178797    | <i>Far2</i>     | D2 | 3.01E-06 | -1.7 | 2.58E-04 | -1.6 |
| NM_007988    | <i>Fasn</i>     | D2 | 5.68E-03 | -1.5 | NS       | NS   |
| NM_007991    | <i>Fbl</i>      | D2 | 4.54E-02 | -1.3 | NS       | NS   |
| NM_001161851 | <i>Fbxo44</i>   | D2 | NS       | NS   | 2.88E-02 | -1.5 |
| NM_176982    | <i>Fbxo48</i>   | D2 | 4.31E-03 | -2.0 | NS       | NS   |
| NM_172591    | <i>Fcho2</i>    | D2 | 2.10E-02 | 1.4  | NS       | NS   |
| NM_010191    | <i>Fdft1</i>    | D2 | 9.18E-09 | -1.7 | 1.67E-06 | -1.6 |
| NM_001253751 | <i>Fdps</i>     | D2 | 5.95E-05 | -1.9 | 2.81E-03 | -1.7 |
| NM_001039824 | <i>Fdx1l</i>    | D2 | 1.01E-02 | -1.5 | NS       | NS   |
| NM_010197    | <i>Fgf1</i>     | D2 | NS       | NS   | 4.42E-02 | 1.8  |
| NM_010201    | <i>Fgf14</i>    | D2 | 1.42E-02 | 1.5  | NS       | NS   |
| NM_008005    | <i>Fgf18</i>    | D2 | 6.22E-03 | -1.7 | NS       | NS   |
| NM_001277268 | <i>Fgf5</i>     | D2 | 2.52E-02 | 1.5  | NS       | NS   |

|              |                   |    |          |      |          |      |
|--------------|-------------------|----|----------|------|----------|------|
| NM_001163215 | <i>Fgfr3</i>      | D2 | 3.31E-04 | 1.9  | 1.87E-02 | 1.6  |
| NM_001164259 | <i>Fgfr1</i>      | D2 | 3.83E-03 | -1.6 | 3.21E-03 | -1.7 |
| NM_008013    | <i>Fgl2</i>       | D2 | 1.63E-02 | 1.5  | NS       | NS   |
| NM_001081243 | <i>Filip1</i>     | D2 | 3.18E-02 | 1.6  | NS       | NS   |
| NM_008019    | <i>Fkbp1a</i>     | D2 | 2.21E-02 | -1.4 | NS       | NS   |
| NM_010219    | <i>Fkbp4</i>      | D2 | 3.22E-02 | -1.3 | NS       | NS   |
| NM_022009    | <i>Flii</i>       | D2 | 4.97E-03 | -1.5 | NS       | NS   |
| NM_001159706 | <i>Folh1</i>      | D2 | 4.54E-02 | 1.7  | 2.03E-02 | 1.9  |
| NM_008037    | <i>Fosl2</i>      | D2 | 1.50E-02 | -1.8 | NS       | NS   |
| NM_001080932 | <i>Foxk2</i>      | D2 | 4.75E-03 | -1.3 | NS       | NS   |
| NM_019739    | <i>Foxo1</i>      | D2 | 3.55E-02 | -1.7 | NS       | NS   |
| NM_194060    | <i>Foxo6</i>      | D2 | 1.97E-03 | -1.9 | NS       | NS   |
| NM_001286607 | <i>Foxp2</i>      | D2 | 2.19E-02 | 4.7  | NS       | NS   |
| NM_001017983 | <i>Foxred2</i>    | D2 | 7.05E-03 | -1.7 | NS       | NS   |
| NM_007984    | <i>Fscn1</i>      | D2 | 1.74E-04 | -1.4 | NS       | NS   |
| NM_008046    | <i>Fst</i>        | D2 | 2.94E-02 | -1.5 | NS       | NS   |
| NM_025799    | <i>Fuca2</i>      | D2 | 1.74E-02 | 1.4  | NS       | NS   |
| NM_011814    | <i>Fxr2</i>       | D2 | 1.72E-02 | -1.3 | NS       | NS   |
| NM_010246    | <i>Fzd9</i>       | D2 | 3.64E-02 | -1.5 | NS       | NS   |
| NM_019757    | <i>Fzr1</i>       | D2 | 6.11E-03 | -1.5 | NS       | NS   |
| NM_001162477 | <i>Gab2</i>       | D2 | 1.55E-02 | -1.4 | NS       | NS   |
| NM_020590    | <i>Gabaraapl1</i> | D2 | 2.47E-02 | 1.3  | NS       | NS   |
| NM_001271467 | <i>Gabpb1</i>     | D2 | 1.63E-02 | -1.5 | 1.88E-02 | -1.5 |
| NM_011817    | <i>Gadd45g</i>    | D2 | 2.27E-02 | 1.8  | NS       | NS   |
| NM_001177691 | <i>Gal3st1</i>    | D2 | 4.01E-02 | 1.6  | NS       | NS   |
| NM_178389    | <i>Gale</i>       | D2 | 4.65E-03 | -1.7 | NS       | NS   |
| NM_001081421 | <i>Galnt16</i>    | D2 | 3.18E-02 | 1.4  | NS       | NS   |
| NM_008083    | <i>Gap43</i>      | D2 | 2.79E-02 | -1.2 | NS       | NS   |
| NM_028022    | <i>Gatsl3</i>     | D2 | NS       | NS   | 1.90E-02 | 2.0  |
| NM_001163282 | <i>Gdf1</i>       | D2 | 2.18E-02 | -1.9 | NS       | NS   |
| NM_145741    | <i>Gdf10</i>      | D2 | 9.46E-04 | -1.6 | NS       | NS   |
| NM_144786    | <i>Ggt7</i>       | D2 | 4.22E-02 | -1.3 | NS       | NS   |
| NM_016867    | <i>Gipc2</i>      | D2 | 4.97E-02 | 1.7  | NS       | NS   |
| NM_010288    | <i>Gja1</i>       | D2 | 8.56E-03 | 1.4  | NS       | NS   |
| NM_080450    | <i>Gjc3</i>       | D2 | 3.64E-03 | 2.3  | NS       | NS   |
| NM_010290    | <i>Gjd2</i>       | D2 | 1.20E-02 | -1.5 | NS       | NS   |
| NM_001286728 | <i>Glcci1</i>     | D2 | 4.41E-02 | 1.4  | NS       | NS   |
| NM_027450    | <i>Glipr2</i>     | D2 | NS       | NS   | 3.75E-02 | 1.6  |

|              |                |    |          |      |          |      |
|--------------|----------------|----|----------|------|----------|------|
| NM_029102    | <i>Glt8d2</i>  | D2 | 1.12E-03 | 2.3  | 7.95E-03 | 2.1  |
| NM_008131    | <i>Glul</i>    | D2 | 1.15E-03 | 1.5  | NS       | NS   |
| NM_001281514 | <i>Gm10354</i> | D2 | NS       | NS   | 3.28E-02 | 1.9  |
| NM_001037926 | <i>Gm13051</i> | D2 | 8.82E-03 | 1.7  | NS       | NS   |
| ENSMUST0000  |                |    |          |      |          | NS   |
| 0105763      | <i>Gm13101</i> | D2 | 4.45E-02 | 1.5  | NS       |      |
| NM_001177392 | <i>Gm13547</i> | D2 | 3.31E-02 | 1.8  | NS       | NS   |
| ENSMUST0000  |                |    |          |      |          | NS   |
| 0140106      | <i>Gm14569</i> | D2 | 8.44E-03 | 1.9  | NS       |      |
| NM_001102665 | <i>Gm14920</i> | D2 | 2.19E-02 | 1.6  | NS       | NS   |
| ENSMUST0000  |                |    |          |      |          | NS   |
| 0164512      | <i>Gm2974</i>  | D2 | 3.18E-02 | -1.5 | NS       |      |
| ENSMUST0000  |                |    |          |      |          | NS   |
| 0163525      | <i>Gm3239</i>  | D2 | 3.24E-02 | -1.5 | NS       |      |
| ENSMUST0000  |                |    |          |      |          | NS   |
| 0181880      | <i>Gm3532</i>  | D2 | 4.88E-02 | -1.6 | NS       |      |
| ENSMUST0000  |                |    |          |      |          | NS   |
| 0171906      | <i>Gm3667</i>  | D2 | 3.54E-02 | -1.4 | NS       |      |
| NM_001034859 | <i>Gm4841</i>  | D2 | 1.11E-02 | -1.9 | NS       | NS   |
| NR_045668    | <i>Gm5124</i>  | D2 | 8.16E-03 | -1.5 | NS       | NS   |
| NM_001033266 | <i>Gm525</i>   | D2 | 3.26E-02 | 1.7  | NS       | NS   |
| XM_485592.5  | <i>Gm5553</i>  | D2 | 3.39E-02 | 1.7  | NS       | NS   |
| NM_001033789 | <i>Gm5820</i>  | D2 | 1.07E-02 | -1.9 | NS       | NS   |
| NM_198101    | <i>Gmip</i>    | D2 | 3.01E-02 | -1.6 | NS       | NS   |
| NM_001190414 | <i>Gne</i>     | D2 | NS       | NS   | 4.47E-02 | -1.4 |
| NM_153547    | <i>Gnl3</i>    | D2 | 5.35E-03 | -1.7 | NS       | NS   |
| NM_001141983 | <i>Golga7b</i> | D2 | 1.08E-02 | -1.5 | NS       | NS   |
| NM_001177669 | <i>Golph3l</i> | D2 | 2.80E-02 | 1.4  | NS       | NS   |
| NM_008149    | <i>Gpam</i>    | D2 | 5.03E-04 | 1.4  | 1.90E-02 | 1.3  |
| NM_001110809 | <i>Gpatch4</i> | D2 | 1.17E-02 | -1.6 | 1.16E-02 | -1.6 |
| NM_016696    | <i>Gpc1</i>    | D2 | 1.70E-02 | -1.5 | NS       | NS   |
| NM_030084    | <i>Gpr108</i>  | D2 | 3.65E-02 | 1.5  | NS       | NS   |
| NM_027518    | <i>Gpr137c</i> | D2 | 1.35E-08 | 2.2  | 1.67E-07 | 2.1  |
| NM_001190297 | <i>Gpr155</i>  | D2 | 3.07E-03 | 1.6  | NS       | NS   |
| NM_029536    | <i>Gpr165</i>  | D2 | 3.52E-02 | 1.5  | NS       | NS   |
| NM_010338    | <i>Gpr37</i>   | D2 | 1.32E-02 | 1.6  | 4.78E-02 | 1.5  |
| NM_134438    | <i>Gpr37l1</i> | D2 | 1.34E-02 | 1.4  | NS       | NS   |
| NM_145066    | <i>Gpr85</i>   | D2 | 3.65E-02 | 1.4  | 4.13E-02 | 1.4  |
| NM_012014    | <i>Gprin1</i>  | D2 | 1.74E-05 | -1.6 | NS       | NS   |
| NM_001177874 | <i>Gps1</i>    | D2 | 4.18E-04 | -1.4 | NS       | NS   |

|              |                  |    |          |      |          |      |
|--------------|------------------|----|----------|------|----------|------|
| NM_026240    | <i>Gramd3</i>    | D2 | 1.24E-02 | 1.6  | NS       | NS   |
| NM_001033351 | <i>Grin3a</i>    | D2 | 2.23E-03 | -1.7 | NS       | NS   |
| NM_175012    | <i>Grp</i>       | D2 | 4.14E-02 | -1.7 | NS       | NS   |
| NM_153419    | <i>Grwd1</i>     | D2 | 3.31E-04 | -2.1 | 8.82E-04 | -2.1 |
| NM_145147    | <i>Gtpbp6</i>    | D2 | 4.62E-02 | -1.6 | NS       | NS   |
| NM_010436    | <i>H2afx</i>     | D2 | 1.28E-03 | -1.6 | NS       | NS   |
| NM_008216    | <i>Has2</i>      | D2 | 1.44E-02 | -2.1 | NS       | NS   |
| NM_028633    | <i>Haus7</i>     | D2 | 2.49E-02 | -1.6 | NS       | NS   |
| NM_008227    | <i>Hcn3</i>      | D2 | 2.11E-03 | -1.7 | NS       | NS   |
| NM_001081192 | <i>Hcn4</i>      | D2 | 4.19E-04 | -1.8 | 1.87E-02 | -1.6 |
| NM_198962    | <i>Hctr2</i>     | D2 | 2.69E-03 | -1.8 | NS       | NS   |
| NM_144835    | <i>Heatr1</i>    | D2 | 1.21E-02 | -1.6 | 1.08E-02 | -1.7 |
| NM_001001883 | <i>Hecw2</i>     | D2 | 2.53E-02 | -1.7 | NS       | NS   |
| NM_175256    | <i>Heg1</i>      | D2 | 4.82E-02 | 1.5  | NS       | NS   |
| NM_175189    | <i>Hepacam</i>   | D2 | 4.54E-02 | 1.4  | NS       | NS   |
| NM_010419    | <i>Hes5</i>      | D2 | 3.55E-02 | -1.5 | NS       | NS   |
| NM_010422    | <i>Hexb</i>      | D2 | 2.03E-05 | 1.7  | NS       | NS   |
| NM_001162950 | <i>Hif3a</i>     | D2 | 2.74E-02 | 1.9  | NS       | NS   |
| NM_008248    | <i>Hint1</i>     | D2 | 3.82E-02 | -1.4 | NS       | NS   |
| NM_178213    | <i>Hist2h2ab</i> | D2 | 5.42E-04 | -1.9 | NS       | NS   |
| NM_007772    | <i>Hivep1</i>    | D2 | 4.87E-04 | -1.6 | NS       | NS   |
| NM_008255    | <i>Hmgcr</i>     | D2 | 2.40E-06 | -1.9 | 1.39E-04 | -1.7 |
| NM_008256    | <i>Hmgcs2</i>    | D2 | 2.21E-04 | 2.6  | 1.25E-02 | 2.1  |
| NM_016957    | <i>Hmgn2</i>     | D2 | 9.36E-03 | 1.4  | NS       | NS   |
| NM_080462    | <i>Hnmt</i>      | D2 | 3.28E-02 | 1.5  | NS       | NS   |
| NM_007545    | <i>Hrk</i>       | D2 | 4.98E-03 | 1.7  | NS       | NS   |
| NM_010476    | <i>Hsd17b7</i>   | D2 | 7.59E-08 | -2.1 | 4.34E-08 | -2.1 |
| NM_175185    | <i>Hsdl1</i>     | D2 | 1.11E-02 | -1.5 | NS       | NS   |
| NM_024255    | <i>Hsdl2</i>     | D2 | 1.91E-03 | 1.6  | NS       | NS   |
| NM_010479    | <i>Hspa1a</i>    | D2 | 1.43E-02 | 1.5  | NS       | NS   |
| NM_001002012 | <i>Hspa2</i>     | D2 | 8.43E-03 | 1.7  | NS       | NS   |
| NM_024172    | <i>Hspbp1</i>    | D2 | 9.90E-04 | -1.5 | NS       | NS   |
| NM_008303    | <i>Hspe1</i>     | D2 | 6.86E-03 | -1.4 | NS       | NS   |
| NM_019564    | <i>Htra1</i>     | D2 | 1.55E-07 | 2.4  | 1.51E-03 | 1.8  |
| NM_019752    | <i>Htra2</i>     | D2 | 3.61E-02 | -1.3 | NS       | NS   |
| NM_008317    | <i>Hyal1</i>     | D2 | 2.49E-02 | 1.7  | NS       | NS   |
| NM_031166    | <i>Id4</i>       | D2 | 1.62E-02 | 2.0  | NS       | NS   |
| NM_145360    | <i>Idi1</i>      | D2 | 7.08E-07 | -2.0 | 8.75E-08 | -2.1 |

|              |                 |    |          |      |          |      |
|--------------|-----------------|----|----------|------|----------|------|
| NM_001101605 | <i>Ifit1bl1</i> | D2 | NS       | NS   | 3.77E-02 | 1.9  |
| NM_013562    | <i>Ifrd1</i>    | D2 | 2.94E-03 | -1.7 | 4.38E-03 | -1.7 |
| NM_198610    | <i>Igsf21</i>   | D2 | 1.14E-02 | -1.6 | NS       | NS   |
| NM_001033323 | <i>Igsf9b</i>   | D2 | NS       | NS   | 1.36E-02 | 1.7  |
| NM_011772    | <i>Ikzf4</i>    | D2 | NS       | NS   | 2.88E-02 | -1.5 |
| NM_145837    | <i>Il17d</i>    | D2 | 1.24E-02 | -1.5 | NS       | NS   |
| NM_001123382 | <i>Il1r1</i>    | D2 | 7.65E-03 | 1.9  | NS       | NS   |
| NM_001159317 | <i>Il1rap</i>   | D2 | NS       | NS   | 1.05E-02 | -1.7 |
| NM_011919    | <i>Ing1</i>     | D2 | 2.08E-02 | -1.4 | 1.32E-03 | -1.5 |
| NM_172439    | <i>Inpp5j</i>   | D2 | 1.20E-03 | 1.9  | 7.71E-04 | 2.0  |
| NM_153526    | <i>Insig1</i>   | D2 | 7.92E-07 | -2.3 | 1.54E-06 | -2.3 |
| NM_026748    | <i>Ints1</i>    | D2 | 2.68E-02 | -1.3 | NS       | NS   |
| NM_029665    | <i>Ipo11</i>    | D2 | 1.76E-02 | -1.4 | NS       | NS   |
| NM_023579    | <i>Ipo5</i>     | D2 | 8.63E-03 | -1.3 | NS       | NS   |
| NM_016851    | <i>Irf6</i>     | D2 | 1.51E-03 | 1.8  | NS       | NS   |
| NM_010586    | <i>Itpr2</i>    | D2 | 2.38E-03 | 1.6  | NS       | NS   |
| NM_027391    | <i>Iyd</i>      | D2 | 4.48E-02 | 1.6  | NS       | NS   |
| NM_033398    | <i>Jmjd6</i>    | D2 | 5.84E-03 | -1.5 | NS       | NS   |
| NM_021310    | <i>Jmy</i>      | D2 | 3.99E-02 | 1.4  | NS       | NS   |
| NM_010591    | <i>Jun</i>      | D2 | 6.88E-14 | 3.3  | 9.39E-11 | 2.9  |
| NM_001286944 | <i>Jund</i>     | D2 | 5.24E-03 | 1.5  | 1.59E-03 | 1.6  |
| NM_001038010 | <i>Kat2a</i>    | D2 | 1.31E-05 | -1.6 | 4.97E-02 | -1.3 |
| NM_145983    | <i>Kcna5</i>    | D2 | 3.00E-02 | 1.8  | NS       | NS   |
| NM_001039347 | <i>Kcnd3</i>    | D2 | 3.82E-02 | -1.4 | 8.92E-03 | -1.6 |
| NM_001081134 | <i>Kcng1</i>    | D2 | 1.21E-06 | -2.5 | 3.25E-05 | -2.2 |
| NM_001039056 | <i>Kcnj15</i>   | D2 | 1.07E-02 | -1.7 | NS       | NS   |
| NM_028231    | <i>Kcnmb2</i>   | D2 | 3.10E-02 | -1.6 | NS       | NS   |
| NM_032397    | <i>Kcnn1</i>    | D2 | 1.34E-02 | -1.6 | NS       | NS   |
| NM_026135    | <i>Kctd16</i>   | D2 | 1.22E-04 | 2.0  | 1.24E-04 | 2.1  |
| NM_027008    | <i>Kctd5</i>    | D2 | NS       | NS   | 3.92E-02 | 1.4  |
| NM_172262    | <i>Kdm1b</i>    | D2 | 3.52E-02 | -1.5 | NS       | NS   |
| NM_011317    | <i>Khdrbs1</i>  | D2 | 2.40E-03 | -1.5 | NS       | NS   |
| NM_001145779 | <i>Kif2a</i>    | D2 | 2.41E-02 | -1.3 | NS       | NS   |
| NM_172898    | <i>Kirrel2</i>  | D2 | 1.60E-02 | 1.7  | 4.48E-05 | 2.4  |
| NM_001122733 | <i>Kit</i>      | D2 | 1.32E-05 | -1.5 | 3.03E-02 | -1.3 |
| NM_008451    | <i>Klc2</i>     | D2 | 1.34E-02 | -1.4 | NS       | NS   |
| NM_010636    | <i>Klf12</i>    | D2 | 3.57E-03 | 1.4  | NS       | NS   |
| NM_078477    | <i>Klf16</i>    | D2 | 7.59E-08 | -2.3 | 7.86E-05 | -1.9 |

|                     |                     |    |          |      |          |      |
|---------------------|---------------------|----|----------|------|----------|------|
| NM_009769           | <i>Klf5</i>         | D2 | 2.94E-02 | -1.7 | NS       | NS   |
| NM_011803           | <i>Klf6</i>         | D2 | 1.51E-02 | -1.5 | 3.03E-02 | -1.5 |
| NM_010638           | <i>Klf9</i>         | D2 | 1.24E-03 | 1.6  | NS       | NS   |
| NM_029436           | <i>Klhl24</i>       | D2 | 2.54E-04 | 1.5  | 1.41E-02 | 1.4  |
| NM_001033171        | <i>Klrg2</i>        | D2 | NS       | NS   | 4.62E-02 | 1.6  |
| NM_010655           | <i>Kpna2</i>        | D2 | 4.19E-06 | -1.8 | 2.58E-04 | -1.7 |
| NM_021284           | <i>Kras</i>         | D2 | 1.34E-02 | -1.3 | NS       | NS   |
| NM_201255           | <i>Krt9</i>         | D2 | 1.61E-02 | 2.0  | NS       | NS   |
| NM_029571           | <i>Kti12</i>        | D2 | 2.73E-02 | -1.3 | 4.74E-02 | -1.3 |
| NM_001289711        | <i>L3mbtl2</i>      | D2 | 1.91E-02 | -1.5 | NS       | NS   |
| NM_001113474        | <i>Lair1</i>        | D2 | 3.36E-02 | 1.6  | NS       | NS   |
| NM_010688           | <i>Lasp1</i>        | D2 | 5.76E-03 | -1.3 | NS       | NS   |
| NM_027448           | <i>Lca5</i>         | D2 | NS       | NS   | 3.48E-02 | -1.5 |
| NM_177846           | <i>Lcmt2</i>        | D2 | 1.63E-02 | 1.7  | NS       | NS   |
| NM_001247984        | <i>Lcp1</i>         | D2 | NS       | NS   | 4.62E-02 | -1.5 |
| NM_001077398        | <i>Ldb2</i>         | D2 | 2.18E-02 | -1.5 | NS       | NS   |
| NM_001252658        | <i>Ldlr</i>         | D2 | 1.92E-05 | -2.4 | 3.42E-05 | -2.4 |
| NM_001018087        | <i>Ldoc1</i>        | D2 | 1.11E-02 | -2.0 | NS       | NS   |
| NM_001081193        | <i>Lemd3</i>        | D2 | 3.73E-02 | -1.4 | NS       | NS   |
| NM_173012           | <i>Letm2</i>        | D2 | 2.15E-02 | 1.5  | 1.20E-02 | 1.6  |
| NM_008494           | <i>Lfn3</i>         | D2 | 4.03E-04 | 1.7  | 2.92E-03 | 1.6  |
| NM_001199043        | <i>Lgals8</i>       | D2 | 6.09E-03 | 1.5  | 2.78E-02 | 1.4  |
| NM_001083125        | <i>Lhx6</i>         | D2 | 5.42E-04 | -2.2 | 1.17E-02 | -2.0 |
| NM_010717           | <i>Limk1</i>        | D2 | 8.84E-04 | -1.5 | NS       | NS   |
| NM_144862           | <i>Lims2</i>        | D2 | 1.63E-02 | 1.9  | NS       | NS   |
| NM_181074           | <i>Lingo1</i>       | D2 | 7.00E-05 | -1.4 | NS       | NS   |
| NM_001191001        | <i>Lins1</i>        | D2 | 1.69E-02 | -1.3 | NS       | NS   |
| NM_001163170        | <i>Lix1l</i>        | D2 | 2.42E-03 | -1.5 | NS       | NS   |
| NM_001002011        | <i>Lmna</i>         | D2 | 2.23E-04 | -1.8 | NS       | NS   |
| NM_001161769        | <i>Lmo4</i>         | D2 | 1.21E-02 | -1.4 | NS       | NS   |
| NM_201529           | <i>Lmo7</i>         | D2 | 1.09E-03 | 1.5  | 9.92E-03 | 1.4  |
| ENSMUST000000096148 | <i>LOC105242423</i> | D2 | 3.37E-02 | 1.9  | NS       | NS   |
| NM_001081150        | <i>Lonrf1</i>       | D2 | 2.10E-02 | -1.5 | NS       | NS   |
| NM_028894           | <i>Lonrf3</i>       | D2 | 3.68E-03 | 1.9  | NS       | NS   |
| NM_145376           | <i>Lpcat1</i>       | D2 | 3.88E-03 | -1.3 | NS       | NS   |
| NM_001141921        | <i>Lrfrn1</i>       | D2 | 5.23E-04 | -1.8 | NS       | NS   |
| NM_027452           | <i>Lrfrn2</i>       | D2 | 1.65E-02 | -1.5 | NS       | NS   |

|              |                 |    |          |      |          |      |
|--------------|-----------------|----|----------|------|----------|------|
| NM_001146048 | <i>Lrrc1</i>    | D2 | 4.67E-02 | 1.6  | NS       | NS   |
| NM_001024645 | <i>Lrrc16b</i>  | D2 | 1.63E-02 | -1.6 | NS       | NS   |
| NM_145152    | <i>Lrrc3</i>    | D2 | 8.59E-04 | -1.8 | NS       | NS   |
| NM_153521    | <i>Lrrc41</i>   | D2 | 8.98E-03 | -1.5 | NS       | NS   |
| NM_133807    | <i>Lrrc59</i>   | D2 | 5.92E-04 | -1.5 | NS       | NS   |
| NM_001111142 | <i>Lrrc73</i>   | D2 | 7.68E-03 | -1.4 | NS       | NS   |
| NM_010732    | <i>Lrrn2</i>    | D2 | 5.16E-03 | -1.6 | NS       | NS   |
| NM_146006    | <i>Lss</i>      | D2 | 4.28E-02 | -1.4 | NS       | NS   |
| NM_181470    | <i>Ltv1</i>     | D2 | 8.04E-04 | -1.9 | 1.88E-02 | -1.7 |
| NM_001252055 | <i>Ly6c1</i>    | D2 | 3.01E-03 | 2.2  | NS       | NS   |
| NM_001135688 | <i>Ly6h</i>     | D2 | 3.80E-03 | -1.5 | NS       | NS   |
| NM_011942    | <i>Lypla2</i>   | D2 | 1.03E-03 | -1.6 | NS       | NS   |
| NM_021500    | <i>Maea</i>     | D2 | 7.67E-03 | -1.4 | NS       | NS   |
| NM_001199246 | <i>Maged2</i>   | D2 | 3.46E-02 | -1.4 | 3.72E-02 | -1.4 |
| NM_053201    | <i>Magee1</i>   | D2 | 6.81E-03 | -1.4 | 3.26E-02 | -1.4 |
| NM_026453    | <i>Mak16</i>    | D2 | 1.87E-02 | -1.5 | NS       | NS   |
| NM_011840    | <i>Map2k5</i>   | D2 | 4.70E-03 | 1.4  | 4.99E-02 | 1.3  |
| NM_011948    | <i>Map3k4</i>   | D2 | NS       | NS   | 2.74E-02 | 1.5  |
| NM_001043355 | <i>Map6</i>     | D2 | 2.33E-02 | -1.3 | NS       | NS   |
| NM_011161    | <i>Mapk11</i>   | D2 | 6.65E-04 | -1.9 | NS       | NS   |
| NM_001045483 | <i>Mapk1ip1</i> | D2 | 1.94E-02 | 1.3  | 2.35E-02 | 1.4  |
| NM_015806    | <i>Mapk6</i>    | D2 | 2.14E-02 | -1.6 | NS       | NS   |
| NM_011841    | <i>Mapk7</i>    | D2 | 2.07E-06 | -1.7 | 4.94E-02 | -1.3 |
| NM_021921    | <i>Mapk8ip2</i> | D2 | 1.83E-02 | -1.3 | NS       | NS   |
| NM_010807    | <i>Marcksl1</i> | D2 | 2.87E-02 | -1.5 | NS       | NS   |
| NM_175439    | <i>Mars2</i>    | D2 | 1.53E-03 | -1.7 | NS       | NS   |
| NM_008555    | <i>Masp1</i>    | D2 | 2.99E-02 | -1.4 | NS       | NS   |
| NM_010773    | <i>Mbd2</i>     | D2 | 6.16E-03 | 1.4  | NS       | NS   |
| NM_028372    | <i>Mblac2</i>   | D2 | 7.93E-04 | -1.7 | NS       | NS   |
| NM_175341    | <i>Mbnl2</i>    | D2 | 2.22E-04 | 1.6  | NS       | NS   |
| NM_029934    | <i>Mboat7</i>   | D2 | 1.83E-02 | -1.6 | NS       | NS   |
| NM_001085373 | <i>Mcc</i>      | D2 | 1.93E-02 | -1.4 | NS       | NS   |
| NM_008564    | <i>Mcm2</i>     | D2 | NS       | NS   | 3.98E-02 | -1.6 |
| NM_008567    | <i>Mcm6</i>     | D2 | 2.98E-02 | -1.4 | NS       | NS   |
| NM_001010833 | <i>Mdc1</i>     | D2 | NS       | NS   | 1.50E-02 | -1.8 |
| NM_001012335 | <i>Mdk</i>      | D2 | 3.99E-02 | 1.7  | NS       | NS   |
| NM_001277309 | <i>Mea1</i>     | D2 | 1.57E-02 | -1.7 | NS       | NS   |
| NM_026896    | <i>Med27</i>    | D2 | 2.92E-02 | -1.3 | NS       | NS   |



|              |                 |    |          |      |          |      |
|--------------|-----------------|----|----------|------|----------|------|
| NM_025895    | <i>Med28</i>    | D2 | 4.10E-02 | -1.4 | NS       | NS   |
| NM_008587    | <i>Mertk</i>    | D2 | 9.24E-07 | 3.1  | 1.65E-03 | 2.3  |
| NM_030705    | <i>Mesdc1</i>   | D2 | 1.22E-02 | -1.8 | NS       | NS   |
| NM_008591    | <i>Met</i>      | D2 | 3.55E-02 | -1.6 | NS       | NS   |
| NM_175224    | <i>Metap1</i>   | D2 | 1.91E-03 | -1.6 | NS       | NS   |
| NM_172567    | <i>Mettl2</i>   | D2 | 4.51E-02 | -1.4 | NS       | NS   |
| NM_025964    | <i>Mettl21a</i> | D2 | 1.92E-02 | 1.4  | NS       | NS   |
| NM_198615    | <i>Mex3d</i>    | D2 | 1.07E-03 | -1.6 | NS       | NS   |
| NM_028657    | <i>Mfsd12</i>   | D2 | 3.73E-02 | -1.6 | NS       | NS   |
| NM_029662    | <i>Mfsd2a</i>   | D2 | 1.54E-02 | 1.5  | NS       | NS   |
| NM_023799    | <i>Mgea5</i>    | D2 | 1.22E-02 | 1.3  | 9.95E-06 | 1.5  |
| NM_177461    | <i>Micall1</i>  | D2 | 2.21E-02 | -1.6 | NS       | NS   |
| NM_030110    | <i>Micu3</i>    | D2 | 6.95E-03 | 1.4  | NS       | NS   |
| NM_021565    | <i>Midn</i>     | D2 | 1.67E-06 | -1.8 | 2.04E-03 | -1.6 |
| NM_153760    | <i>Mill2</i>    | D2 | 3.73E-02 | 1.7  | NS       | NS   |
| NR_106092    | <i>Mir7233</i>  | D2 | NS       | NS   | 1.87E-02 | 2.0  |
| NM_022328    | <i>Mllt1</i>    | D2 | 4.54E-02 | -1.5 | NS       | NS   |
| NM_001159384 | <i>Mlx</i>      | D2 | 1.76E-04 | -1.6 | NS       | NS   |
| NM_008609    | <i>Mmp15</i>    | D2 | 1.49E-05 | -1.9 | 8.26E-05 | -1.9 |
| NM_172457    | <i>Mob3a</i>    | D2 | 5.77E-04 | -1.8 | NS       | NS   |
| NM_023773    | <i>Mphosph8</i> | D2 | 1.11E-02 | -1.4 | NS       | NS   |
| NM_172610    | <i>Mpped1</i>   | D2 | 3.49E-02 | -1.4 | NS       | NS   |
| NM_027204    | <i>Mrpl12</i>   | D2 | 8.65E-03 | -1.4 | NS       | NS   |
| NM_026490    | <i>Mrpl19</i>   | D2 | 2.92E-02 | -1.3 | NS       | NS   |
| NM_026851    | <i>Mrpl52</i>   | D2 | 1.87E-02 | -1.7 | NS       | NS   |
| NM_025878    | <i>Mrps18b</i>  | D2 | 2.53E-02 | -1.4 | 1.35E-02 | -1.5 |
| NM_026835    | <i>Ms4a6d</i>   | D2 | 4.61E-02 | 1.9  | NS       | NS   |
| NM_001163833 | <i>Msl3l2</i>   | D2 | 4.88E-02 | 1.6  | NS       | NS   |
| NM_025436    | <i>Msmo1</i>    | D2 | 6.29E-09 | -2.7 | 5.99E-08 | -2.6 |
| NM_013602    | <i>Mt1</i>      | D2 | 7.59E-08 | 2.1  | 2.34E-05 | 1.8  |
| NM_008630    | <i>Mt2</i>      | D2 | 2.86E-11 | 4.0  | 1.81E-10 | 3.8  |
| NM_008638    | <i>Mthfd2</i>   | D2 | 1.11E-03 | -1.9 | NS       | NS   |
| NM_020009    | <i>Mtor</i>     | D2 | 3.42E-02 | -1.3 | NS       | NS   |
| NM_001005863 | <i>Mtus1</i>    | D2 | 2.32E-03 | 1.7  | 1.58E-02 | 1.6  |
| NM_023431    | <i>Mum1</i>     | D2 | 1.50E-02 | -1.4 | NS       | NS   |
| NM_001164630 | <i>Mum1l1</i>   | D2 | 3.85E-02 | 1.7  | NS       | NS   |
| NM_138656    | <i>Mvd</i>      | D2 | 2.34E-10 | -3.1 | 2.95E-05 | -2.2 |
| NM_023556    | <i>Mvk</i>      | D2 | 1.75E-02 | -1.7 | 3.87E-02 | -1.7 |

|              |                  |    |          |      |          |      |
|--------------|------------------|----|----------|------|----------|------|
| NM_010753    | <i>Mxd4</i>      | D2 | 3.44E-03 | 1.7  | 2.34E-02 | 1.6  |
| NM_001008542 | <i>Mxi1</i>      | D2 | 2.34E-10 | 2.0  | 5.73E-09 | 1.9  |
| NM_001177352 | <i>Myc</i>       | D2 | 4.23E-04 | -1.7 | NS       | NS   |
| NM_001033481 | <i>Myrf</i>      | D2 | 3.53E-02 | 1.8  | NS       | NS   |
| NM_030153    | <i>Naa35</i>     | D2 | NS       | NS   | 4.24E-02 | -1.4 |
| NM_001040395 | <i>Nadk2</i>     | D2 | 3.13E-04 | 1.5  | NS       | NS   |
| NM_178421    | <i>Nanos1</i>    | D2 | 7.49E-03 | -1.6 | NS       | NS   |
| NM_001285489 | <i>Nap1l4</i>    | D2 | 4.82E-02 | -1.3 | NS       | NS   |
| NM_178728    | <i>Napepld</i>   | D2 | 1.69E-02 | 1.9  | NS       | NS   |
| NM_001081475 | <i>Nasp</i>      | D2 | 8.88E-03 | -1.6 | NS       | NS   |
| NM_001114085 | <i>Nde1</i>      | D2 | 3.10E-03 | 1.7  | 2.81E-03 | 1.7  |
| NM_172399    | <i>Ndnf</i>      | D2 | 4.40E-02 | -1.4 | NS       | NS   |
| NM_001145959 | <i>Ndrp2</i>     | D2 | 1.91E-03 | 1.3  | NS       | NS   |
| NM_027244    | <i>Ndufa11</i>   | D2 | 1.45E-02 | -1.4 | NS       | NS   |
| NM_026742    | <i>Ndufaf4</i>   | D2 | 8.23E-03 | -1.4 | 5.70E-04 | -1.6 |
| NM_026612    | <i>Ndufb2</i>    | D2 | 1.57E-02 | -1.4 | NS       | NS   |
| NM_025843    | <i>Ndufb7</i>    | D2 | 3.29E-02 | -1.5 | NS       | NS   |
| NM_029272    | <i>Ndufs7</i>    | D2 | 3.28E-02 | -1.4 | NS       | NS   |
| NM_001271443 | <i>Ndufs8</i>    | D2 | 2.66E-02 | -1.3 | NS       | NS   |
| NM_145138    | <i>Nek9</i>      | D2 | 2.78E-02 | 1.4  | NS       | NS   |
| NM_021393    | <i>Nelfb</i>     | D2 | 4.47E-02 | -1.4 | NS       | NS   |
| NM_016701    | <i>Nes</i>       | D2 | 4.23E-02 | -1.5 | NS       | NS   |
| NM_001081324 | <i>Neto2</i>     | D2 | 3.71E-02 | -1.3 | NS       | NS   |
| NM_001271411 | <i>Nfam1</i>     | D2 | 4.29E-02 | 1.6  | NS       | NS   |
| NM_001170591 | <i>Nfu1</i>      | D2 | 3.49E-02 | -1.4 | NS       | NS   |
| NM_011482    | <i>Nhp2l1</i>    | D2 | 2.19E-04 | -1.5 | NS       | NS   |
| NM_001163592 | <i>Nhsl1</i>     | D2 | 4.10E-02 | 1.3  | NS       | NS   |
| NM_026472    | <i>Nifk</i>      | D2 | NS       | NS   | 4.85E-02 | -1.3 |
| NM_145469    | <i>Nipal2</i>    | D2 | 1.83E-02 | 1.5  | 1.17E-02 | 1.6  |
| NM_028995    | <i>Nipal3</i>    | D2 | 2.60E-02 | 1.5  | 2.63E-02 | 1.6  |
| NM_025623    | <i>Nipsnap3b</i> | D2 | 3.00E-02 | -1.4 | NS       | NS   |
| NM_008704    | <i>Nme1</i>      | D2 | 4.08E-02 | -1.3 | NS       | NS   |
| NM_001077529 | <i>Nme2</i>      | D2 | 9.09E-03 | -1.3 | NS       | NS   |
| NM_019515    | <i>Nmu</i>       | D2 | 4.20E-02 | -1.6 | NS       | NS   |
| NM_010923    | <i>Nnat</i>      | D2 | 4.62E-02 | -1.3 | NS       | NS   |
| NM_021303    | <i>Noc2l</i>     | D2 | 1.35E-04 | -1.7 | NS       | NS   |
| NM_153570    | <i>Noc4l</i>     | D2 | 6.70E-04 | -1.6 | NS       | NS   |
| NM_009834    | <i>Noct</i>      | D2 | 2.54E-03 | -1.6 | 2.04E-03 | -1.7 |

|              |                   |    |          |      |          |      |
|--------------|-------------------|----|----------|------|----------|------|
| NM_133800    | <i>Nol12</i>      | D2 | 1.97E-03 | -1.8 | NS       | NS   |
| NM_001001986 | <i>Nol4l</i>      | D2 | 5.42E-04 | -1.6 | 1.35E-02 | -1.5 |
| NM_153057    | <i>Nomo1</i>      | D2 | 2.30E-03 | -1.5 | NS       | NS   |
| NM_138747    | <i>Nop2</i>       | D2 | 2.97E-07 | -1.9 | 3.86E-03 | -1.5 |
| NM_024193    | <i>Nop56</i>      | D2 | 4.27E-02 | -1.4 | 7.41E-03 | -1.6 |
| NM_008718    | <i>Npas1</i>      | D2 | 8.90E-04 | -1.9 | NS       | NS   |
| NM_008723    | <i>Npm3</i>       | D2 | 4.41E-02 | -1.5 | NS       | NS   |
| NM_001029836 | <i>Npnt</i>       | D2 | 4.69E-02 | 1.5  | NS       | NS   |
| NM_001139509 | <i>Nr4a2</i>      | D2 | 1.48E-03 | -3.0 | NS       | NS   |
| NM_015743    | <i>Nr4a3</i>      | D2 | 6.62E-04 | -1.5 | NS       | NS   |
| NM_173440    | <i>Nrip1</i>      | D2 | 2.34E-02 | 1.4  | NS       | NS   |
| NM_008737    | <i>Nrp1</i>       | D2 | 1.90E-02 | -1.5 | NS       | NS   |
| NM_001077403 | <i>Nrp2</i>       | D2 | 2.79E-02 | -1.4 | NS       | NS   |
| NM_010941    | <i>Nsdhl</i>      | D2 | 3.61E-05 | -1.5 | 7.99E-05 | -1.5 |
| NM_027602    | <i>Nsun7</i>      | D2 | 4.93E-02 | 1.6  | NS       | NS   |
| NM_001164363 | <i>Nt5c2</i>      | D2 | 6.11E-03 | 1.4  | NS       | NS   |
| NM_001163348 | <i>Ntng1</i>      | D2 | 2.21E-02 | -1.9 | NS       | NS   |
| NM_001025074 | <i>Ntrk2</i>      | D2 | 4.10E-02 | 1.3  | NS       | NS   |
| NM_001190179 | <i>Nup35</i>      | D2 | NS       | NS   | 3.07E-02 | -1.5 |
| NM_008751    | <i>Nxph1</i>      | D2 | 1.33E-04 | -1.7 | 2.03E-02 | -1.5 |
| NM_001161430 | <i>Nxt2</i>       | D2 | 4.25E-02 | 1.3  | NS       | NS   |
| NM_026950    | <i>Ociad2</i>     | D2 | 4.23E-02 | 1.4  | NS       | NS   |
| NM_013614    | <i>Odc1</i>       | D2 | 3.29E-02 | 1.5  | NS       | NS   |
| NM_173777    | <i>Olfn2</i>      | D2 | 1.90E-03 | -1.6 | NS       | NS   |
| NM_001005524 | <i>Olfr194</i>    | D2 | 4.12E-02 | 2.0  | NS       | NS   |
| NM_001011780 | <i>Olfr287</i>    | D2 | 1.20E-02 | 1.8  | NS       | NS   |
| NR_033638    | <i>Olfr29-ps1</i> | D2 | 1.34E-02 | -1.8 | NS       | NS   |
| NM_147115    | <i>Olfr578</i>    | D2 | 1.38E-02 | 1.8  | NS       | NS   |
| NM_147121    | <i>Olfr644</i>    | D2 | 4.10E-02 | 1.7  | NS       | NS   |
| NM_147061    | <i>Olfr691</i>    | D2 | 1.13E-02 | -1.9 | NS       | NS   |
| NM_019409    | <i>Omg</i>        | D2 | 7.83E-04 | 1.5  | NS       | NS   |
| NM_010098    | <i>Opn3</i>       | D2 | 3.18E-03 | -1.9 | NS       | NS   |
| NM_001003717 | <i>Osbpl8</i>     | D2 | 4.05E-02 | -1.4 | NS       | NS   |
| NM_001134791 | <i>Osbpl9</i>     | D2 | 1.35E-04 | 1.4  | 3.25E-04 | 1.4  |
| NM_001285839 | <i>Osgepl1</i>    | D2 | 7.58E-03 | 1.6  | NS       | NS   |
| NM_001001490 | <i>Oxgr1</i>      | D2 | 4.92E-02 | -1.8 | NS       | NS   |
| NM_027032    | <i>Pacrg</i>      | D2 | 3.96E-03 | 1.6  | NS       | NS   |
| NM_008776    | <i>Pafah1b3</i>   | D2 | 1.23E-03 | -1.9 | NS       | NS   |

|              |                |    |          |      |          |      |
|--------------|----------------|----|----------|------|----------|------|
| NM_026420    | <i>Paip2</i>   | D2 | 3.35E-04 | 1.4  | NS       | NS   |
| NM_146169    | <i>Paip2b</i>  | D2 | NS       | NS   | 3.19E-02 | 1.5  |
| NM_001169131 | <i>Papd7</i>   | D2 | NS       | NS   | 3.92E-02 | -1.5 |
| NM_198410    | <i>Paqr6</i>   | D2 | 2.52E-02 | 1.6  | NS       | NS   |
| NM_028829    | <i>Paqr8</i>   | D2 | 7.63E-03 | 1.4  | 1.06E-02 | 1.5  |
| NM_011039    | <i>Pax7</i>    | D2 | NS       | NS   | 4.67E-02 | 1.5  |
| NM_001081251 | <i>Pbrm1</i>   | D2 | 2.40E-02 | -1.3 | NS       | NS   |
| NM_011865    | <i>Pcbp1</i>   | D2 | 8.59E-04 | -1.5 | NS       | NS   |
| NM_029357    | <i>Pcdh1</i>   | D2 | 2.60E-02 | -1.2 | NS       | NS   |
| NM_001042726 | <i>Pcdh8</i>   | D2 | 4.33E-03 | -1.5 | NS       | NS   |
| NM_146129    | <i>Pcif1</i>   | D2 | 4.39E-03 | -1.6 | NS       | NS   |
| NM_183028    | <i>Pcmt1</i>   | D2 | 2.21E-03 | 1.4  | NS       | NS   |
| NM_153594    | <i>Pcmt2</i>   | D2 | 4.98E-03 | 1.7  | NS       | NS   |
| NM_001163144 | <i>Pcsk5</i>   | D2 | 3.42E-02 | -1.5 | NS       | NS   |
| NM_024229    | <i>Pcyt2</i>   | D2 | 1.38E-02 | -1.5 | 7.97E-03 | -1.6 |
| NM_001177980 | <i>Pde4b</i>   | D2 | 1.01E-02 | 1.4  | NS       | NS   |
| NM_013875    | <i>Pde7b</i>   | D2 | 1.24E-02 | 2.6  | NS       | NS   |
| NM_008808    | <i>Pdgfa</i>   | D2 | 2.70E-05 | -1.7 | 3.41E-05 | -1.7 |
| NM_011057    | <i>Pdgfb</i>   | D2 | 1.11E-02 | -1.7 | NS       | NS   |
| NM_001163794 | <i>Pdik1</i>   | D2 | 7.85E-03 | -1.5 | NS       | NS   |
| NM_013743    | <i>Pdk4</i>    | D2 | 2.50E-03 | 1.8  | NS       | NS   |
| NM_016861    | <i>Pdlim1</i>  | D2 | 5.63E-04 | 2.6  | NS       | NS   |
| NM_019501    | <i>Pdss1</i>   | D2 | 1.51E-02 | -1.7 | NS       | NS   |
| NM_008820    | <i>Pepd</i>    | D2 | 4.08E-02 | -1.4 | NS       | NS   |
| NM_001159367 | <i>Per1</i>    | D2 | 3.82E-02 | 1.4  | NS       | NS   |
| NM_134025    | <i>Pex12</i>   | D2 | NS       | NS   | 3.92E-02 | 1.6  |
| NM_011072    | <i>Pfn1</i>    | D2 | 4.96E-02 | -1.3 | NS       | NS   |
| NM_001163314 | <i>Pgap1</i>   | D2 | 2.67E-02 | -1.3 | NS       | NS   |
| NM_025954    | <i>Pgp</i>     | D2 | 3.27E-02 | -1.4 | NS       | NS   |
| NM_001007154 | <i>Phactr3</i> | D2 | 1.94E-02 | 1.4  | NS       | NS   |
| NM_008831    | <i>Phb</i>     | D2 | 7.59E-03 | -1.3 | 1.47E-03 | -1.4 |
| NM_172705    | <i>Phf13</i>   | D2 | 6.09E-03 | -1.8 | NS       | NS   |
| NM_030064    | <i>Phf23</i>   | D2 | 2.43E-04 | -1.8 | 2.90E-02 | -1.5 |
| NM_026737    | <i>Phf5a</i>   | D2 | NS       | NS   | 1.51E-02 | -1.6 |
| NM_009344    | <i>Phlda1</i>  | D2 | 1.38E-02 | -1.8 | 1.93E-02 | -1.9 |
| NM_001278207 | <i>Pih1d1</i>  | D2 | 2.33E-02 | -1.4 | NS       | NS   |
| NM_178149    | <i>Pik3ip1</i> | D2 | 1.92E-06 | 2.4  | 1.12E-07 | 2.7  |
| NM_001024955 | <i>Pik3r1</i>  | D2 | 2.23E-10 | 1.9  | 1.25E-10 | 1.9  |

|              |                 |    |          |      |          |      |
|--------------|-----------------|----|----------|------|----------|------|
| NM_181585    | <i>Pik3r3</i>   | D2 | 9.98E-05 | 1.6  | NS       | NS   |
| NM_145478    | <i>Pim3</i>     | D2 | 1.97E-02 | -1.8 | NS       | NS   |
| NM_028228    | <i>Pinx1</i>    | D2 | 2.69E-03 | -1.7 | 4.83E-03 | -1.7 |
| NM_001099779 | <i>Pklr</i>     | D2 | 3.82E-02 | 1.5  | NS       | NS   |
| NM_001029838 | <i>Pknox2</i>   | D2 | 4.92E-02 | -1.5 | NS       | NS   |
| NM_008872    | <i>Plat</i>     | D2 | 3.49E-02 | 1.5  | NS       | NS   |
| NM_152813    | <i>Plcd3</i>    | D2 | 2.63E-04 | 2.0  | 1.65E-02 | 1.7  |
| NM_001081456 | <i>Plcd4</i>    | D2 | 6.68E-03 | 1.7  | NS       | NS   |
| NM_019588    | <i>Plce1</i>    | D2 | 7.24E-03 | 1.8  | NS       | NS   |
| NM_001177503 | <i>Plekhd1</i>  | D2 | NS       | NS   | 1.65E-02 | 1.5  |
| NM_024413    | <i>Plekhf1</i>  | D2 | 1.36E-04 | 2.0  | 1.35E-02 | 1.7  |
| NM_001033253 | <i>Plekhg1</i>  | D2 | 5.78E-08 | 2.4  | 2.28E-05 | 2.0  |
| NM_013807    | <i>Plk3</i>     | D2 | 1.51E-06 | -2.1 | 6.16E-04 | -1.8 |
| NM_011123    | <i>Plp1</i>     | D2 | 1.01E-02 | 4.8  | NS       | NS   |
| NM_018797    | <i>Plxnc1</i>   | D2 | 1.83E-02 | -1.4 | NS       | NS   |
| NM_008884    | <i>Pml</i>      | D2 | NS       | NS   | 6.81E-03 | 1.6  |
| NM_026925    | <i>Pnlip</i>    | D2 | 4.10E-02 | -1.5 | NS       | NS   |
| NM_008891    | <i>Pnn</i>      | D2 | 3.53E-02 | -1.4 | NS       | NS   |
| NM_025443    | <i>Pno1</i>     | D2 | 3.22E-02 | -1.4 | 2.75E-02 | -1.5 |
| NM_001205075 | <i>Pnoc</i>     | D2 | 1.31E-02 | -1.5 | NS       | NS   |
| NM_026383    | <i>Pnrc2</i>    | D2 | 1.26E-03 | 1.5  | 3.04E-02 | 1.4  |
| NM_178627    | <i>Poldip3</i>  | D2 | 2.92E-02 | -1.4 | NS       | NS   |
| NM_020032    | <i>Poll</i>     | D2 | NS       | NS   | 2.71E-02 | 1.8  |
| NM_009086    | <i>Polr1b</i>   | D2 | 9.60E-03 | -1.7 | NS       | NS   |
| NM_001164082 | <i>Polr3d</i>   | D2 | NS       | NS   | 2.11E-03 | -1.7 |
| NM_148932    | <i>Pom121</i>   | D2 | 2.68E-04 | -1.6 | NS       | NS   |
| NM_133249    | <i>Ppargc1b</i> | D2 | 7.01E-03 | -1.7 | 1.10E-02 | -1.7 |
| NM_008014    | <i>Ppm1g</i>    | D2 | 3.31E-04 | -1.4 | 1.01E-02 | -1.3 |
| NM_175523    | <i>Ppm1k</i>    | D2 | 9.61E-04 | 1.7  | NS       | NS   |
| NM_008889    | <i>Ppp1r14b</i> | D2 | 7.75E-03 | -1.6 | NS       | NS   |
| NM_027242    | <i>Ppp1r35</i>  | D2 | 1.55E-02 | -1.6 | 2.43E-02 | -1.6 |
| NM_009358    | <i>Ppp2r5d</i>  | D2 | 3.72E-02 | -1.3 | NS       | NS   |
| NM_001081214 | <i>Pprc1</i>    | D2 | 4.40E-02 | -1.8 | NS       | NS   |
| NM_007548    | <i>Prdm1</i>    | D2 | 3.22E-02 | -1.6 | NS       | NS   |
| NM_025596    | <i>Prelid1</i>  | D2 | 4.92E-02 | -1.3 | NS       | NS   |
| NM_177782    | <i>Prex1</i>    | D2 | 1.05E-02 | -1.4 | NS       | NS   |
| NM_178143    | <i>Prkaa2</i>   | D2 | 3.27E-02 | -1.3 | NS       | NS   |
| NM_008859    | <i>Prkcq</i>    | D2 | 1.70E-02 | 1.5  | NS       | NS   |

|              |                 |    |          |      |          |      |
|--------------|-----------------|----|----------|------|----------|------|
| NM_001252476 | <i>Prmt1</i>    | D2 | 1.36E-04 | -1.7 | 4.64E-02 | -1.4 |
| NM_001077638 | <i>Prmt2</i>    | D2 | 2.00E-04 | -1.5 | NS       | NS   |
| NM_145404    | <i>Prmt7</i>    | D2 | 4.86E-03 | -1.5 | NS       | NS   |
| NM_001126338 | <i>Prnd</i>     | D2 | 4.38E-05 | -2.3 | NS       | NS   |
| NM_011172    | <i>Prodh</i>    | D2 | 3.21E-02 | 1.6  | NS       | NS   |
| NM_018786    | <i>Prpf40b</i>  | D2 | 1.70E-02 | -1.6 | NS       | NS   |
| NM_175022    | <i>Prr12</i>    | D2 | 1.38E-02 | -1.6 | NS       | NS   |
| NM_027626    | <i>Psd3</i>     | D2 | 1.20E-02 | 1.4  | NS       | NS   |
| NM_177698    | <i>Psd3</i>     | D2 | 2.53E-02 | 1.3  | NS       | NS   |
| NM_009439    | <i>Psmd3</i>    | D2 | 4.74E-02 | -1.3 | NS       | NS   |
| NM_001282017 | <i>Psmd4</i>    | D2 | 1.91E-02 | -1.4 | NS       | NS   |
| NM_011192    | <i>Psme3</i>    | D2 | 1.89E-02 | -1.3 | NS       | NS   |
| NM_025682    | <i>Pspc1</i>    | D2 | 1.23E-02 | -1.5 | NS       | NS   |
| NM_028474    | <i>Ptchd4</i>   | D2 | 1.11E-02 | -1.7 | NS       | NS   |
| NM_133949    | <i>Ptov1</i>    | D2 | 4.63E-02 | -1.3 | NS       | NS   |
| NM_001166388 | <i>Ptp4a3</i>   | D2 | 3.82E-02 | -1.4 | NS       | NS   |
| NM_207232    | <i>Ptpdc1</i>   | D2 | NS       | NS   | 4.94E-02 | 1.6  |
| NM_011201    | <i>Ptpn1</i>    | D2 | 6.18E-03 | -1.4 | NS       | NS   |
| NM_019933    | <i>Ptpn4</i>    | D2 | 6.11E-03 | 1.7  | NS       | NS   |
| NM_001163565 | <i>Ptpn5</i>    | D2 | 1.63E-02 | -1.3 | NS       | NS   |
| NM_019651    | <i>Ptpn9</i>    | D2 | 2.94E-04 | -1.5 | NS       | NS   |
| NM_025412    | <i>Pycrl</i>    | D2 | 3.25E-02 | -1.6 | NS       | NS   |
| NM_133198    | <i>Pygl</i>     | D2 | 4.25E-02 | 1.7  | NS       | NS   |
| NM_001159516 | <i>Qk</i>       | D2 | 1.08E-02 | 1.2  | NS       | NS   |
| NM_026677    | <i>Rab13</i>    | D2 | 3.19E-02 | 1.6  | NS       | NS   |
| NM_029494    | <i>Rab30</i>    | D2 | 1.71E-07 | 2.0  | 3.89E-07 | 2.0  |
| NM_133685    | <i>Rab31</i>    | D2 | 1.76E-02 | 1.3  | NS       | NS   |
| NM_175122    | <i>Rab39b</i>   | D2 | NS       | NS   | 4.51E-03 | 1.4  |
| NM_029391    | <i>Rab4b</i>    | D2 | 9.61E-03 | -1.5 | NS       | NS   |
| NM_001038621 | <i>Rabgap1l</i> | D2 | 3.25E-05 | 1.5  | 3.08E-05 | 1.5  |
| NM_001199059 | <i>Rabgef1</i>  | D2 | 4.30E-02 | -1.3 | NS       | NS   |
| NM_133223    | <i>Rac3</i>     | D2 | 1.47E-02 | -1.4 | NS       | NS   |
| NM_001277938 | <i>Rad51d</i>   | D2 | 4.23E-02 | 1.6  | NS       | NS   |
| NM_019491    | <i>Rala</i>     | D2 | 1.01E-02 | -1.5 | NS       | NS   |
| NM_001145834 | <i>Rallds</i>   | D2 | 1.96E-02 | -1.4 | NS       | NS   |
| NM_009391    | <i>Ran</i>      | D2 | 4.83E-03 | -1.6 | NS       | NS   |
| NM_001252466 | <i>Ranbp3</i>   | D2 | NS       | NS   | 2.22E-02 | -1.4 |
| NM_001099624 | <i>Rapgef2</i>  | D2 | 5.72E-11 | 2.0  | 4.97E-05 | 1.5  |

|              |                 |    |          |      |          |      |
|--------------|-----------------|----|----------|------|----------|------|
| NM_175930    | <i>Rapgef5</i>  | D2 | 3.01E-02 | 1.4  | NS       | NS   |
| NM_001252494 | <i>Rapgef6</i>  | D2 | 5.95E-09 | 2.4  | 3.30E-07 | 2.1  |
| NM_001176528 | <i>Rara</i>     | D2 | 4.18E-05 | -1.8 | 1.80E-03 | -1.7 |
| NM_009025    | <i>Rasa3</i>    | D2 | 4.31E-03 | -1.6 | 7.51E-03 | -1.6 |
| NM_001166493 | <i>Rasgrp3</i>  | D2 | NS       | NS   | 3.95E-02 | -1.5 |
| NM_028234    | <i>Rbm33</i>    | D2 | 3.11E-03 | 1.5  | 1.41E-02 | 1.4  |
| NM_001141981 | <i>Rbm43</i>    | D2 | 4.83E-03 | 1.5  | 1.25E-02 | 1.5  |
| NM_001081549 | <i>Rcan1</i>    | D2 | 3.59E-02 | 1.3  | NS       | NS   |
| NM_021557    | <i>Rdh11</i>    | D2 | 8.13E-03 | -1.6 | NS       | NS   |
| NM_030017    | <i>Rdh12</i>    | D2 | NS       | NS   | 1.88E-02 | 1.8  |
| NM_001204931 | <i>Reep6</i>    | D2 | 2.94E-02 | -1.5 | NS       | NS   |
| NM_153793    | <i>Rell2</i>    | D2 | 1.04E-02 | -1.4 | NS       | NS   |
| NM_011261    | <i>Reln</i>     | D2 | 1.63E-02 | -1.6 | NS       | NS   |
| NM_024233    | <i>Rexo2</i>    | D2 | 6.44E-04 | -1.7 | NS       | NS   |
| NM_016846    | <i>Rgl1</i>     | D2 | 4.17E-02 | 1.3  | NS       | NS   |
| NM_178615    | <i>Rgmb</i>     | D2 | 3.68E-02 | -1.3 | NS       | NS   |
| NM_009061    | <i>Rgs2</i>     | D2 | NS       | NS   | 4.15E-02 | -1.9 |
| NM_009062    | <i>Rgs4</i>     | D2 | 5.28E-03 | 1.6  | NS       | NS   |
| NM_001165934 | <i>Rgs9</i>     | D2 | 3.22E-02 | 1.7  | NS       | NS   |
| NM_146002    | <i>Rhbdd2</i>   | D2 | 2.66E-02 | -1.5 | 3.66E-02 | -1.5 |
| NM_053075    | <i>Rheb</i>     | D2 | 3.70E-02 | -1.3 | NS       | NS   |
| NM_153514    | <i>Rhobtb2</i>  | D2 | 8.03E-04 | -1.6 | 3.78E-03 | -1.6 |
| NM_175092    | <i>Rhof</i>     | D2 | 3.89E-03 | -1.5 | NS       | NS   |
| NM_001004193 | <i>Rhox8</i>    | D2 | 3.13E-02 | 1.4  | NS       | NS   |
| NM_030168    | <i>Rictor</i>   | D2 | 4.12E-02 | 1.3  | NS       | NS   |
| NM_001037915 | <i>Ripply1</i>  | D2 | NS       | NS   | 2.75E-02 | 1.8  |
| NM_172612    | <i>Rnd1</i>     | D2 | 4.95E-05 | -1.9 | NS       | NS   |
| NM_144528    | <i>Rnf126</i>   | D2 | 8.50E-03 | -1.3 | NS       | NS   |
| NM_001166553 | <i>Rnf145</i>   | D2 | 1.17E-06 | -1.7 | 2.19E-04 | -1.5 |
| NM_001289917 | <i>Rora</i>     | D2 | 3.55E-02 | 1.8  | NS       | NS   |
| NM_001163461 | <i>Rpap2</i>    | D2 | 4.23E-02 | 1.4  | NS       | NS   |
| NM_011286    | <i>Rph3a</i>    | D2 | 3.71E-02 | -1.4 | NS       | NS   |
| NM_133982    | <i>Rpp25</i>    | D2 | 8.01E-05 | -2.0 | 9.31E-06 | -2.2 |
| NM_175109    | <i>Rps19bp1</i> | D2 | 3.18E-02 | -1.5 | NS       | NS   |
| NM_146244    | <i>Rps6kl1</i>  | D2 | 2.43E-04 | 1.9  | NS       | NS   |
| NM_199447    | <i>Rrp12</i>    | D2 | 1.08E-02 | -1.7 | NS       | NS   |
| NM_001159671 | <i>Rsph6a</i>   | D2 | 3.18E-02 | 1.5  | NS       | NS   |
| NM_198620    | <i>Rundc3b</i>  | D2 | 1.31E-02 | -1.3 | NS       | NS   |

|              |                  |    |          |      |          |      |
|--------------|------------------|----|----------|------|----------|------|
| NM_001111026 | <i>Runx1t1</i>   | D2 | 3.53E-02 | -1.4 | NS       | NS   |
| NM_001083807 | <i>Rusc1</i>     | D2 | 2.87E-02 | -1.5 | NS       | NS   |
| NM_178717    | <i>Rxfp3</i>     | D2 | 1.34E-02 | -1.7 | NS       | NS   |
| NM_010101    | <i>S1pr3</i>     | D2 | 4.48E-02 | -1.7 | NS       | NS   |
| NM_001081415 | <i>Samd1</i>     | D2 | 1.24E-03 | -1.7 | NS       | NS   |
| NM_172676    | <i>Samd10</i>    | D2 | 1.39E-02 | -1.7 | NS       | NS   |
| NM_001037221 | <i>Samd4</i>     | D2 | 1.36E-03 | 1.8  | NS       | NS   |
| NM_001168521 | <i>Sarm1</i>     | D2 | 3.76E-02 | -1.6 | NS       | NS   |
| NM_016926    | <i>Sart3</i>     | D2 | 3.87E-02 | -1.5 | NS       | NS   |
| NM_145587    | <i>Sbk1</i>      | D2 | 2.12E-03 | -1.7 | NS       | NS   |
| NM_001008422 | <i>Scaf1</i>     | D2 | 3.79E-02 | -1.5 | NS       | NS   |
| NM_011886    | <i>Scamp3</i>    | D2 | 1.75E-02 | -1.6 | NS       | NS   |
| NM_020255    | <i>Scand1</i>    | D2 | 3.84E-02 | -1.6 | NS       | NS   |
| NM_172604    | <i>Scara3</i>    | D2 | 1.74E-02 | 1.5  | 4.62E-02 | 1.5  |
| NM_009129    | <i>Scg2</i>      | D2 | 5.50E-04 | 1.4  | 4.13E-02 | 1.3  |
| NM_009136    | <i>Scrg1</i>     | D2 | 1.01E-02 | 1.4  | NS       | NS   |
| NM_130893    | <i>Scrt1</i>     | D2 | 7.65E-03 | -1.7 | NS       | NS   |
| NM_023912    | <i>Scyl1</i>     | D2 | 1.20E-02 | -1.5 | NS       | NS   |
| NM_011521    | <i>Sdc4</i>      | D2 | 1.30E-06 | 3.0  | 3.75E-03 | 2.1  |
| NM_025468    | <i>Sec11c</i>    | D2 | 4.52E-02 | -1.3 | NS       | NS   |
| NM_024206    | <i>Sec13</i>     | D2 | 3.42E-02 | -1.5 | 4.27E-02 | -1.5 |
| NM_153055    | <i>Sec63</i>     | D2 | 2.04E-02 | 1.4  | NS       | NS   |
| NM_009151    | <i>Selplg</i>    | D2 | 1.11E-02 | 1.9  | NS       | NS   |
| NM_001126047 | <i>Sema4c</i>    | D2 | 3.68E-02 | -1.4 | NS       | NS   |
| NM_001042613 | <i>Sepp1</i>     | D2 | 3.91E-02 | 1.4  | NS       | NS   |
| NM_008458    | <i>Serpina3c</i> | D2 | 5.25E-04 | 2.1  | NS       | NS   |
| NM_001177794 | <i>Sertad4</i>   | D2 | NS       | NS   | 1.88E-02 | 1.5  |
| NM_030261    | <i>Sesn3</i>     | D2 | 4.24E-08 | 1.8  | 2.47E-03 | 1.5  |
| NM_001040398 | <i>Setd1b</i>    | D2 | NS       | NS   | 4.62E-02 | -1.5 |
| NM_001035123 | <i>Setd6</i>     | D2 | 2.13E-02 | -1.6 | NS       | NS   |
| NM_080793    | <i>Setd7</i>     | D2 | 4.95E-02 | 1.5  | NS       | NS   |
| NM_021286    | <i>Sez6</i>      | D2 | 1.24E-03 | -1.6 | NS       | NS   |
| NM_153053    | <i>Sf3b4</i>     | D2 | 1.42E-02 | -1.5 | NS       | NS   |
| NM_134114    | <i>Sft2d1</i>    | D2 | NS       | NS   | 2.50E-02 | -1.4 |
| NM_029339    | <i>Sgf29</i>     | D2 | 4.19E-02 | -1.4 | NS       | NS   |
| NM_001168525 | <i>Sgms1</i>     | D2 | 7.67E-03 | 1.9  | NS       | NS   |
| NM_001162965 | <i>Sgsm1</i>     | D2 | 1.34E-02 | -1.4 | NS       | NS   |
| NM_134091    | <i>Sgsm3</i>     | D2 | 3.08E-02 | -1.5 | NS       | NS   |



|              |                 |    |          |      |          |      |
|--------------|-----------------|----|----------|------|----------|------|
| NM_009167    | <i>Shc3</i>     | D2 | 3.00E-05 | -1.5 | 1.32E-02 | -1.3 |
| NM_138676    | <i>Shkbp1</i>   | D2 | 2.99E-02 | -1.6 | NS       | NS   |
| NM_001252316 | <i>Shmt2</i>    | D2 | 7.91E-03 | -1.5 | NS       | NS   |
| NM_001168505 | <i>Shoc2</i>    | D2 | 1.88E-04 | -1.3 | NS       | NS   |
| NM_001286538 | <i>Sigmar1</i>  | D2 | 1.59E-03 | -1.5 | NS       | NS   |
| NM_010831    | <i>Sik1</i>     | D2 | 2.86E-04 | -1.7 | 2.24E-02 | -1.5 |
| NM_176987    | <i>Simc1</i>    | D2 | 3.18E-02 | -1.5 | NS       | NS   |
| NM_001110350 | <i>Sin3a</i>    | D2 | 3.13E-02 | -1.3 | NS       | NS   |
| NM_001039090 | <i>Skil</i>     | D2 | 4.69E-02 | 1.3  | NS       | NS   |
| NM_027921    | <i>Slc16a14</i> | D2 | 4.20E-02 | 1.4  | 2.46E-02 | 1.5  |
| NM_001029842 | <i>Slc16a6</i>  | D2 | 4.23E-06 | 2.9  | NS       | NS   |
| NM_018861    | <i>Slc1a4</i>   | D2 | 2.51E-02 | -1.3 | NS       | NS   |
| NM_001159593 | <i>Slc20a1</i>  | D2 | 3.00E-03 | -1.4 | 1.95E-02 | -1.4 |
| NM_001033167 | <i>Slc22a23</i> | D2 | 4.14E-02 | -1.3 | NS       | NS   |
| NM_001110240 | <i>Slc24a2</i>  | D2 | 3.64E-03 | 1.7  | NS       | NS   |
| NM_153150    | <i>Slc25a1</i>  | D2 | 7.15E-04 | -1.6 | NS       | NS   |
| NM_023596    | <i>Slc29a3</i>  | D2 | 3.66E-02 | 1.4  | 3.15E-02 | 1.4  |
| NM_011400    | <i>Slc2a1</i>   | D2 | 3.83E-03 | 1.7  | 1.61E-02 | 1.7  |
| NM_172479    | <i>Slc38a5</i>  | D2 | 1.57E-02 | -1.5 | NS       | NS   |
| NM_001037717 | <i>Slc38a6</i>  | D2 | 1.37E-02 | 1.5  | 3.28E-02 | 1.4  |
| NM_001012305 | <i>Slc39a12</i> | D2 | 2.68E-06 | 2.2  | NS       | NS   |
| NM_001199283 | <i>Slc43a2</i>  | D2 | 8.16E-04 | 1.7  | 1.65E-03 | 1.7  |
| NM_001081263 | <i>Slc44a5</i>  | D2 | 6.70E-04 | 1.6  | 6.75E-05 | 1.8  |
| NM_029643    | <i>Slc52a2</i>  | D2 | 1.70E-02 | -1.5 | NS       | NS   |
| NM_001142809 | <i>Slc6a8</i>   | D2 | 4.79E-02 | 1.3  | NS       | NS   |
| NM_017394    | <i>Slc7a10</i>  | D2 | 3.18E-02 | 1.4  | NS       | NS   |
| NM_012030    | <i>Slc9a3r1</i> | D2 | 5.31E-03 | -1.5 | NS       | NS   |
| NM_177909    | <i>Slc9a9</i>   | D2 | 2.43E-04 | 1.7  | NS       | NS   |
| NM_001038643 | <i>Slco3a1</i>  | D2 | 3.91E-04 | -1.6 | 1.07E-04 | -1.7 |
| NM_148933    | <i>Slco4a1</i>  | D2 | 3.68E-02 | -1.6 | NS       | NS   |
| NM_025690    | <i>Sltm</i>     | D2 | 4.51E-02 | -1.3 | 2.34E-02 | -1.4 |
| NM_008539    | <i>Smad1</i>    | D2 | 8.41E-04 | 1.5  | NS       | NS   |
| NM_001252481 | <i>Smad2</i>    | D2 | 1.39E-04 | -1.7 | 4.83E-03 | -1.6 |
| NM_028534    | <i>Smap1</i>    | D2 | 9.14E-03 | -1.3 | NS       | NS   |
| NM_008017    | <i>Smc2</i>     | D2 | 3.64E-02 | -1.5 | NS       | NS   |
| NM_134133    | <i>Smim3</i>    | D2 | NS       | NS   | 1.50E-02 | 2.0  |
| NM_009214    | <i>Sms</i>      | D2 | 3.30E-02 | -1.3 | NS       | NS   |
| NM_026796    | <i>Smyd2</i>    | D2 | 4.64E-03 | -1.4 | NS       | NS   |

|              |                   |    |          |      |          |      |
|--------------|-------------------|----|----------|------|----------|------|
| NM_144918    | <i>Smyd5</i>      | D2 | 7.83E-03 | -1.6 | NS       | NS   |
| NM_133968    | <i>Snape2</i>     | D2 | 2.92E-02 | -1.5 | NS       | NS   |
| NM_183316    | <i>Snape5</i>     | D2 | 3.55E-02 | 1.4  | NS       | NS   |
| NM_001190156 | <i>Snx7</i>       | D2 | NS       | NS   | 3.47E-02 | -1.4 |
| NM_001168655 | <i>Socs2</i>      | D2 | 7.82E-05 | -1.8 | NS       | NS   |
| NM_001034962 | <i>Sorbs1</i>     | D2 | 1.91E-02 | 1.3  | NS       | NS   |
| NM_146126    | <i>Sord</i>       | D2 | 4.10E-02 | 1.5  | NS       | NS   |
| NM_011447    | <i>Sox8</i>       | D2 | 1.97E-02 | 1.8  | NS       | NS   |
| NM_001025428 | <i>Spag9</i>      | D2 | 1.34E-02 | 1.3  | NS       | NS   |
| NM_001172561 | <i>Sphk2</i>      | D2 | 2.63E-03 | -1.7 | NS       | NS   |
| NM_182927    | <i>Spred3</i>     | D2 | 2.42E-06 | -2.7 | 2.95E-05 | -2.5 |
| NM_011898    | <i>Spry4</i>      | D2 | 2.27E-07 | -2.6 | 4.25E-05 | -2.2 |
| NM_029035    | <i>Spsb1</i>      | D2 | 2.95E-02 | 1.8  | NS       | NS   |
| NM_011479    | <i>Sptlc2</i>     | D2 | NS       | NS   | 2.23E-02 | -1.4 |
| NM_009270    | <i>Sqle</i>       | D2 | 2.64E-08 | -2.1 | 2.35E-06 | -1.9 |
| NM_033218    | <i>Srebf2</i>     | D2 | 4.19E-04 | -1.3 | 5.27E-03 | -1.3 |
| NM_020493    | <i>Srf</i>        | D2 | 4.54E-02 | -1.5 | 2.39E-02 | -1.6 |
| NM_001081037 | <i>Srgap1</i>     | D2 | 3.16E-05 | -1.8 | 1.29E-04 | -1.8 |
| NM_001081011 | <i>Srgap2</i>     | D2 | 2.76E-02 | -1.2 | NS       | NS   |
| NM_009272    | <i>Srm</i>        | D2 | 1.92E-05 | -1.6 | 1.53E-02 | -1.4 |
| NM_016795    | <i>Srpkl</i>      | D2 | 4.92E-03 | -1.5 | 2.35E-03 | -1.6 |
| NM_001109909 | <i>Srrt</i>       | D2 | 6.23E-04 | -1.6 | NS       | NS   |
| NM_011358    | <i>Srsf2</i>      | D2 | 4.71E-07 | -1.9 | 1.67E-03 | -1.5 |
| NM_001195485 | <i>Srsf7</i>      | D2 | 6.03E-04 | -1.8 | 1.34E-02 | -1.6 |
| NM_178750    | <i>Ss18l1</i>     | D2 | 7.31E-05 | -1.6 | NS       | NS   |
| NM_026155    | <i>Ssr3</i>       | D2 | 2.47E-03 | 1.4  | NS       | NS   |
| NM_020491    | <i>Sssca1</i>     | D2 | 4.62E-02 | -1.4 | NS       | NS   |
| NM_009177    | <i>St3gal1</i>    | D2 | 8.43E-03 | -2.0 | NS       | NS   |
| NM_012028    | <i>St6galnac5</i> | D2 | 1.94E-04 | -1.5 | NS       | NS   |
| NM_001159745 | <i>St8sia4</i>    | D2 | 7.72E-03 | -1.6 | NS       | NS   |
| NM_133774    | <i>Stard4</i>     | D2 | 2.70E-05 | -2.1 | 7.59E-04 | -1.9 |
| NM_016737    | <i>Stip1</i>      | D2 | NS       | NS   | 3.99E-03 | -1.5 |
| NM_022416    | <i>Stk32b</i>     | D2 | 1.11E-02 | -1.6 | NS       | NS   |
| NM_009133    | <i>Stmn3</i>      | D2 | 3.89E-02 | -1.3 | NS       | NS   |
| NM_019675    | <i>Stmn4</i>      | D2 | 4.28E-02 | 1.4  | 1.18E-02 | 1.6  |
| NM_153563    | <i>Strip1</i>     | D2 | 5.74E-06 | -1.6 | 3.37E-05 | -1.5 |
| NM_019719    | <i>Stub1</i>      | D2 | 2.47E-03 | -1.5 | NS       | NS   |
| NM_001114611 | <i>Stxbp5l</i>    | D2 | 2.06E-04 | 1.6  | NS       | NS   |

|              |                 |    |          |      |          |      |
|--------------|-----------------|----|----------|------|----------|------|
| NM_001168290 | <i>Sugp2</i>    | D2 | 8.59E-04 | -1.6 | NS       | NS   |
| NM_133670    | <i>Sult1a1</i>  | D2 | 4.23E-02 | 2.1  | NS       | NS   |
| NM_019995    | <i>Supt20</i>   | D2 | NS       | NS   | 2.81E-03 | -1.7 |
| NM_013678    | <i>Surf2</i>    | D2 | 9.60E-03 | -1.4 | NS       | NS   |
| NM_009300    | <i>Svs4</i>     | D2 | 5.06E-03 | 1.8  | NS       | NS   |
| NM_153399    | <i>Syne1</i>    | D2 | 5.62E-03 | 1.5  | NS       | NS   |
| NM_018803    | <i>Syt10</i>    | D2 | 8.46E-03 | 1.9  | NS       | NS   |
| NM_018804    | <i>Syt11</i>    | D2 | 1.65E-02 | 1.3  | NS       | NS   |
| NM_001285857 | <i>Syt8</i>     | D2 | 1.54E-02 | 1.6  | NS       | NS   |
| NM_001040085 | <i>Sytl2</i>    | D2 | 1.09E-03 | 1.9  | 1.12E-02 | 1.8  |
| NM_025609    | <i>Tab1</i>     | D2 | 2.43E-02 | -1.5 | NS       | NS   |
| NM_030245    | <i>Tada1</i>    | D2 | 7.37E-03 | -1.5 | NS       | NS   |
| NM_001177798 | <i>Taf6l</i>    | D2 | 2.82E-02 | -1.6 | NS       | NS   |
| NM_033074    | <i>Tars</i>     | D2 | 1.11E-02 | -1.4 | NS       | NS   |
| NM_009321    | <i>Tbca</i>     | D2 | 4.62E-02 | -1.4 | NS       | NS   |
| NM_025548    | <i>Tbcb</i>     | D2 | 9.84E-03 | -1.4 | NS       | NS   |
| NM_001289689 | <i>Tbpl2</i>    | D2 | NS       | NS   | 2.87E-02 | 2.0  |
| NM_146008    | <i>Tcp11l2</i>  | D2 | 4.28E-02 | 1.5  | NS       | NS   |
| NM_028354    | <i>Tdp1</i>     | D2 | 1.82E-02 | -1.3 | NS       | NS   |
| NM_001163661 | <i>Telo2</i>    | D2 | 2.99E-02 | -1.5 | NS       | NS   |
| NM_011571    | <i>Tesk1</i>    | D2 | 4.75E-04 | -1.4 | NS       | NS   |
| NM_001289603 | <i>Tfcp2</i>    | D2 | NS       | NS   | 1.58E-02 | -1.5 |
| NM_001289550 | <i>Tgfb1i1</i>  | D2 | 1.01E-02 | -1.7 | 1.37E-03 | -2.0 |
| NM_009381    | <i>Thrsp</i>    | D2 | NS       | NS   | 2.63E-02 | 1.7  |
| NM_145585    | <i>Thumpd1</i>  | D2 | 3.98E-02 | -1.4 | NS       | NS   |
| NM_174989    | <i>Ticam1</i>   | D2 | NS       | NS   | 3.78E-03 | 2.1  |
| NM_177003    | <i>Tigar</i>    | D2 | 2.32E-03 | -1.8 | 2.17E-02 | -1.7 |
| NM_011591    | <i>Timm17b</i>  | D2 | 1.14E-02 | -1.5 | NS       | NS   |
| NM_205820    | <i>Tlr13</i>    | D2 | 2.50E-03 | 2.6  | NS       | NS   |
| NM_133211    | <i>Tlr7</i>     | D2 | 1.27E-04 | 2.5  | NS       | NS   |
| NM_026617    | <i>Tmbim4</i>   | D2 | 2.15E-02 | 1.3  | NS       | NS   |
| NM_178638    | <i>Tmem108</i>  | D2 | 2.15E-02 | -1.4 | 2.62E-02 | -1.5 |
| NM_001039723 | <i>Tmem120b</i> | D2 | 4.59E-02 | -1.5 | NS       | NS   |
| NM_027495    | <i>Tmem144</i>  | D2 | 1.40E-02 | 1.6  | NS       | NS   |
| NM_011626    | <i>Tmem165</i>  | D2 | 2.34E-02 | -1.3 | NS       | NS   |
| NM_172049    | <i>Tmem18</i>   | D2 | NS       | NS   | 6.01E-03 | 1.4  |
| NM_001160385 | <i>Tmem196</i>  | D2 | 4.10E-05 | 2.1  | NS       | NS   |
| NM_177344    | <i>Tmem203</i>  | D2 | 6.58E-03 | -1.7 | NS       | NS   |

|              |                  |    |          |      |          |      |
|--------------|------------------|----|----------|------|----------|------|
| NM_144525    | <i>Tmem214</i>   | D2 | 3.83E-02 | -1.3 | 2.90E-02 | -1.4 |
| NM_001162901 | <i>Tmem217</i>   | D2 | 3.88E-02 | 1.6  | NS       | NS   |
| NM_029748    | <i>Tmem234</i>   | D2 | 1.34E-02 | -1.5 | NS       | NS   |
| NM_029384    | <i>Tmem238</i>   | D2 | 1.06E-02 | -1.6 | NS       | NS   |
| NM_199305    | <i>Tmem39b</i>   | D2 | 2.99E-02 | -1.5 | NS       | NS   |
| NM_028766    | <i>Tmem43</i>    | D2 | NS       | NS   | 3.04E-02 | 1.4  |
| NM_001033394 | <i>Tmem88b</i>   | D2 | 3.99E-02 | 2.1  | NS       | NS   |
| NM_133706    | <i>Tmem97</i>    | D2 | 5.63E-05 | -2.1 | 2.35E-02 | -1.7 |
| NM_029537    | <i>Tmem98</i>    | D2 | 2.71E-02 | 1.8  | NS       | NS   |
| NM_027902    | <i>Tmprss6</i>   | D2 | 3.55E-02 | 1.7  | NS       | NS   |
| NM_011607    | <i>Tnc</i>       | D2 | 3.70E-05 | -1.9 | 4.05E-03 | -1.6 |
| NM_001033535 | <i>Tnfrsf8l3</i> | D2 | NS       | NS   | 2.43E-02 | -1.6 |
| NM_001161746 | <i>Tnfrsf12a</i> | D2 | 4.04E-02 | 1.6  | NS       | NS   |
| NM_001048267 | <i>Tnpo1</i>     | D2 | 1.09E-03 | 1.5  | 7.15E-03 | 1.4  |
| NM_001109748 | <i>Tomm40</i>    | D2 | 1.76E-04 | -1.5 | NS       | NS   |
| NM_026485    | <i>Trabd</i>     | D2 | 2.07E-02 | -1.5 | NS       | NS   |
| NM_021502    | <i>Trappc2l</i>  | D2 | 1.16E-02 | -1.5 | NS       | NS   |
| NM_021789    | <i>Trappc4</i>   | D2 | 2.40E-03 | -1.5 | NS       | NS   |
| NM_001164641 | <i>Trappc9</i>   | D2 | 2.39E-05 | -1.6 | NS       | NS   |
| NM_144551    | <i>Trib2</i>     | D2 | 1.19E-02 | -1.5 | NS       | NS   |
| NM_009054    | <i>Trim27</i>    | D2 | 4.51E-02 | -1.4 | NS       | NS   |
| NM_029979    | <i>Trim35</i>    | D2 | 7.59E-03 | -1.4 | NS       | NS   |
| NM_001170855 | <i>Trim36</i>    | D2 | 6.63E-04 | -2.4 | NS       | NS   |
| NM_001039466 | <i>Trim46</i>    | D2 | 2.23E-04 | -1.7 | NS       | NS   |
| NM_178110    | <i>Trim62</i>    | D2 | 1.00E-03 | -1.7 | 1.93E-02 | -1.5 |
| NM_198632    | <i>Trim67</i>    | D2 | 2.12E-03 | -1.8 | NS       | NS   |
| NM_001167994 | <i>Trmt2b</i>    | D2 | 7.85E-03 | 1.8  | NS       | NS   |
| NM_001099792 | <i>Trmt61a</i>   | D2 | 1.44E-02 | -1.6 | NS       | NS   |
| NM_001127233 | <i>Trp53</i>     | D2 | 3.10E-03 | -1.5 | 6.06E-03 | -1.5 |
| NM_013735    | <i>Trp53bp1</i>  | D2 | 8.06E-03 | -1.5 | NS       | NS   |
| NM_173378    | <i>Trp53bp2</i>  | D2 | 1.63E-02 | 1.5  | NS       | NS   |
| NM_012035    | <i>Trpc7</i>     | D2 | 1.21E-02 | -2.0 | NS       | NS   |
| NM_001077364 | <i>Tsc22d3</i>   | D2 | 4.87E-02 | 1.5  | 1.05E-02 | 1.8  |
| NM_001024619 | <i>Tsku</i>      | D2 | 1.63E-02 | -1.8 | NS       | NS   |
| NM_145928    | <i>Tspan14</i>   | D2 | 3.27E-02 | -1.3 | NS       | NS   |
| NM_197996    | <i>Tspan15</i>   | D2 | 2.85E-03 | 1.7  | NS       | NS   |
| NM_025982    | <i>Tspan31</i>   | D2 | 3.46E-02 | 1.3  | NS       | NS   |
| NM_001252588 | <i>Tspan4</i>    | D2 | 5.34E-03 | -1.6 | NS       | NS   |

|              |                |    |          |      |          |      |
|--------------|----------------|----|----------|------|----------|------|
| NM_028417    | <i>Ttc9b</i>   | D2 | 1.21E-02 | -1.7 | NS       | NS   |
| NM_023279    | <i>Tubb3</i>   | D2 | 3.01E-03 | -1.4 | NS       | NS   |
| NM_146116    | <i>Tubb4b</i>  | D2 | 1.58E-05 | -1.6 | 1.60E-02 | -1.4 |
| NM_011655    | <i>Tubb5</i>   | D2 | 1.57E-02 | -1.2 | NS       | NS   |
| NM_172597    | <i>Txndc16</i> | D2 | 1.19E-02 | 1.4  | NS       | NS   |
| NM_001009935 | <i>Txnip</i>   | D2 | 8.13E-07 | 3.9  | 7.99E-05 | 3.1  |
| NM_001163769 | <i>U2af1</i>   | D2 | 7.91E-03 | -1.5 | NS       | NS   |
| NM_133806    | <i>Uap1</i>    | D2 | 1.34E-02 | -1.3 | NS       | NS   |
| NM_176860    | <i>Ubash3b</i> | D2 | 1.19E-02 | -1.6 | NS       | NS   |
| NM_026454    | <i>Ube2f</i>   | D2 | 3.18E-02 | -1.3 | NS       | NS   |
| NM_001169576 | <i>Ube2h</i>   | D2 | 1.82E-05 | 1.7  | 6.49E-03 | 1.4  |
| NM_001168469 | <i>Ube2m</i>   | D2 | 3.50E-02 | -1.2 | NS       | NS   |
| NM_001145162 | <i>Ube2ql1</i> | D2 | 2.36E-06 | -1.5 | 3.87E-03 | -1.4 |
| NM_030724    | <i>Uck2</i>    | D2 | NS       | NS   | 2.11E-03 | -1.4 |
| NM_031250    | <i>Ucn3</i>    | D2 | 2.41E-02 | 1.6  | NS       | NS   |
| NM_011673    | <i>Ugcg</i>    | D2 | NS       | NS   | 1.85E-02 | -1.3 |
| NM_011674    | <i>Ugt8a</i>   | D2 | 2.79E-02 | 1.8  | NS       | NS   |
| NM_029770    | <i>Unc5b</i>   | D2 | 1.70E-02 | -1.4 | NS       | NS   |
| NM_025710    | <i>Uqcrfs1</i> | D2 | 3.55E-02 | -1.3 | NS       | NS   |
| NM_009462    | <i>Usp10</i>   | D2 | 1.57E-03 | -1.4 | 3.87E-03 | -1.4 |
| NM_183225    | <i>Usp24</i>   | D2 | 1.45E-02 | -1.4 | NS       | NS   |
| NM_019461    | <i>Usp27x</i>  | D2 | 2.41E-02 | -1.5 | NS       | NS   |
| NM_173754    | <i>Usp43</i>   | D2 | 2.67E-04 | -2.1 | NS       | NS   |
| NM_152825    | <i>Usp45</i>   | D2 | 2.95E-02 | 1.6  | NS       | NS   |
| NM_030180    | <i>Usp54</i>   | D2 | 4.12E-03 | 1.7  | NS       | NS   |
| NM_001013375 | <i>Utp18</i>   | D2 | 6.03E-04 | -1.6 | NS       | NS   |
| NM_175158    | <i>Utp20</i>   | D2 | 7.83E-03 | -1.7 | 1.10E-02 | -1.7 |
| NM_146216    | <i>Vac14</i>   | D2 | 2.28E-02 | -1.4 | 3.22E-03 | -1.5 |
| NM_013933    | <i>Vapa</i>    | D2 | 3.23E-02 | -1.2 | NS       | NS   |
| NM_177354    | <i>Vash1</i>   | D2 | 3.97E-02 | -1.6 | NS       | NS   |
| NM_001282021 | <i>Vasp</i>    | D2 | 3.51E-02 | -1.6 | NS       | NS   |
| NM_012037    | <i>Vat1</i>    | D2 | 5.92E-05 | -1.8 | NS       | NS   |
| NM_009500    | <i>Vav2</i>    | D2 | 1.97E-03 | -1.6 | NS       | NS   |
| NM_001185164 | <i>Vegfb</i>   | D2 | 3.06E-02 | -1.5 | NS       | NS   |
| NM_001039385 | <i>Vgf</i>     | D2 | 2.40E-06 | -2.9 | 8.81E-03 | -2.0 |
| NM_001104623 | <i>Vmn2r12</i> | D2 | 4.56E-02 | 1.7  | NS       | NS   |
| NM_029478    | <i>Vmp1</i>    | D2 | 7.75E-03 | 1.4  | NS       | NS   |
| NM_145967    | <i>Vstm2a</i>  | D2 | NS       | NS   | 8.57E-03 | -1.3 |

|              |                |    |          |      |          |      |
|--------------|----------------|----|----------|------|----------|------|
| NM_027906    | <i>Vwa8</i>    | D2 | 4.97E-02 | 1.4  | NS       | NS   |
| NM_175450    | <i>Wdr18</i>   | D2 | 1.35E-02 | -1.5 | NS       | NS   |
| NM_172372    | <i>Wdr45</i>   | D2 | 3.56E-02 | 1.5  | NS       | NS   |
| NM_020603    | <i>Wdr46</i>   | D2 | 2.74E-02 | -1.6 | 1.68E-02 | -1.7 |
| NM_134139    | <i>Wdr74</i>   | D2 | 3.18E-02 | -1.4 | 1.90E-02 | -1.4 |
| NM_001011874 | <i>Xkr4</i>    | D2 | 1.94E-02 | 1.4  | 3.10E-02 | 1.4  |
| NM_001011732 | <i>Xkr7</i>    | D2 | 4.22E-02 | -1.6 | NS       | NS   |
| NM_001081642 | <i>Xlr4a</i>   | D2 | 3.49E-02 | 1.7  | NS       | NS   |
| NM_001035226 | <i>Xpo1</i>    | D2 | NS       | NS   | 3.76E-02 | 1.4  |
| NM_175645    | <i>Xylt1</i>   | D2 | 4.54E-02 | -1.3 | NS       | NS   |
| NM_026940    | <i>Ydjc</i>    | D2 | 4.22E-02 | -1.6 | NS       | NS   |
| NM_001005342 | <i>Ypel4</i>   | D2 | 3.54E-06 | 3.0  | 5.26E-05 | 2.7  |
| NM_027166    | <i>Ypel5</i>   | D2 | NS       | NS   | 6.14E-03 | 1.4  |
| NM_153566    | <i>Yrdc</i>    | D2 | 7.59E-03 | -1.7 | NS       | NS   |
| NM_001163013 | <i>Ythdc2</i>  | D2 | 2.97E-03 | -1.7 | NS       | NS   |
| NM_173761    | <i>Ythdf1</i>  | D2 | 3.18E-02 | -1.5 | NS       | NS   |
| NM_028106    | <i>Zbed3</i>   | D2 | 2.01E-02 | 1.4  | NS       | NS   |
| NM_001033324 | <i>Zbtb16</i>  | D2 | 1.28E-03 | 2.0  | NS       | NS   |
| NM_001033466 | <i>Zbtb2</i>   | D2 | 1.69E-02 | -1.5 | NS       | NS   |
| NM_001100460 | <i>Zbtb42</i>  | D2 | 2.69E-02 | 1.8  | NS       | NS   |
| NM_001115130 | <i>Zbtb44</i>  | D2 | 1.13E-02 | 1.4  | NS       | NS   |
| NM_173181    | <i>Zc2hc1a</i> | D2 | 3.71E-02 | -1.3 | 5.17E-03 | -1.4 |
| NM_029888    | <i>Zfp142</i>  | D2 | 9.60E-03 | -1.4 | NS       | NS   |
| NM_001253694 | <i>Zfp219</i>  | D2 | 2.82E-02 | -1.6 | NS       | NS   |
| NM_175247    | <i>Zfp28</i>   | D2 | 1.55E-02 | -1.8 | NS       | NS   |
| NM_013866    | <i>Zfp385a</i> | D2 | 3.36E-02 | -1.5 | NS       | NS   |
| NM_001110309 | <i>Zfp426</i>  | D2 | 1.84E-03 | 1.6  | 3.78E-03 | 1.6  |
| NM_001013777 | <i>Zfp488</i>  | D2 | 8.06E-03 | 2.0  | NS       | NS   |
| NM_207255    | <i>Zfp532</i>  | D2 | 2.88E-03 | 1.5  | 1.64E-02 | 1.4  |
| NM_172385    | <i>Zfp536</i>  | D2 | 4.33E-02 | -1.5 | NS       | NS   |
| NM_026741    | <i>Zfp579</i>  | D2 | 4.25E-02 | -1.5 | NS       | NS   |
| NM_001145999 | <i>Zfp710</i>  | D2 | 4.64E-02 | -1.5 | NS       | NS   |
| NM_001267583 | <i>Zfp811</i>  | D2 | 8.13E-03 | 1.5  | 2.78E-02 | 1.5  |
| NM_146231    | <i>Zfp825</i>  | D2 | 3.84E-02 | 1.3  | NS       | NS   |
| NM_173387    | <i>Zfp879</i>  | D2 | 1.01E-02 | 1.6  | NS       | NS   |
| NM_001105557 | <i>Zfp938</i>  | D2 | 2.12E-02 | 1.4  | NS       | NS   |
| NM_001177985 | <i>Zmym3</i>   | D2 | NS       | NS   | 2.90E-02 | -1.5 |
| NM_001252584 | <i>Zmynd8</i>  | D2 | 2.04E-04 | 1.8  | 2.36E-03 | 1.7  |

|              |                      |      |          |      |          |      |
|--------------|----------------------|------|----------|------|----------|------|
| NM_028028    | <i>Zswim1</i>        | D2   | 1.08E-02 | -1.5 | NS       | NS   |
| NM_001033634 | <i>Zyg11b</i>        | D2   | NS       | NS   | 4.73E-02 | -1.2 |
| NM_175149    | <i>2310022B05Rik</i> | BXD2 | 3.68E-03 | 1.7  | NS       | NS   |
| NR_045177    | <i>2900055J20Rik</i> | BXD2 | NS       | NS   | 3.62E-02 | 1.6  |
| NM_001167925 | <i>A730017C20Rik</i> | BXD2 | NS       | NS   | 6.37E-03 | 1.3  |
| NR_015488    | <i>A930003A15Rik</i> | BXD2 | NS       | NS   | 4.78E-02 | 1.8  |
| NR_033609    | <i>A930017M01Rik</i> | BXD2 | 3.79E-03 | 1.8  | NS       | NS   |
| NM_030210    | <i>Aacs</i>          | BXD2 | 2.20E-03 | -1.6 | 1.24E-02 | -1.6 |
| NM_013851    | <i>Abca8b</i>        | BXD2 | 1.76E-03 | 2.1  | NS       | NS   |
| NM_153151    | <i>Acat3</i>         | BXD2 | NS       | NS   | 3.50E-02 | -1.4 |
| NM_001276719 | <i>Ackr2</i>         | BXD2 | NS       | NS   | 2.05E-02 | -2.0 |
| NM_001199296 | <i>Acly</i>          | BXD2 | NS       | NS   | 1.03E-02 | -1.4 |
| NM_001205385 | <i>Actr3</i>         | BXD2 | NS       | NS   | 4.60E-02 | -1.2 |
| NM_178162    | <i>Agfg2</i>         | BXD2 | 2.39E-02 | -1.7 | NS       | NS   |
| NM_001172146 | <i>Aimp2</i>         | BXD2 | 4.92E-02 | -1.6 | NS       | NS   |
| NM_025538    | <i>Alkbh7</i>        | BXD2 | 2.05E-02 | -1.5 | NS       | NS   |
| NM_019764    | <i>Amotl2</i>        | BXD2 | NS       | NS   | 4.54E-03 | 1.9  |
| NM_001276301 | <i>Ampd3</i>         | BXD2 | 1.46E-02 | 1.7  | NS       | NS   |
| NM_020581    | <i>Angptl4</i>       | BXD2 | 7.69E-03 | 2.0  | NS       | NS   |
| NM_026674    | <i>Aph1c</i>         | BXD2 | 2.93E-02 | 1.5  | NS       | NS   |
| NM_023598    | <i>Arid5b</i>        | BXD2 | 1.57E-04 | 1.8  | NS       | NS   |
| NM_001042591 | <i>Arrdc3</i>        | BXD2 | 3.11E-06 | 2.5  | 1.87E-03 | 2.0  |
| NM_001042592 | <i>Arrdc4</i>        | BXD2 | 2.17E-02 | 1.7  | NS       | NS   |
| NM_026217    | <i>Atg12</i>         | BXD2 | 1.90E-03 | 1.4  | NS       | NS   |
| NM_001199304 | <i>Atxn1</i>         | BXD2 | 4.90E-02 | 1.4  | NS       | NS   |
| NM_016847    | <i>Avpr1a</i>        | BXD2 | NS       | NS   | 4.34E-03 | -2.0 |
| NM_001122993 | <i>B3galt5</i>       | BXD2 | 5.39E-03 | 1.7  | NS       | NS   |
| NM_001169114 | <i>B3gnt2</i>        | BXD2 | 1.07E-02 | 1.7  | NS       | NS   |
| NM_001159407 | <i>B3gnt5</i>        | BXD2 | 7.63E-03 | 1.7  | NS       | NS   |
| NM_019835    | <i>B4galt5</i>       | BXD2 | NS       | NS   | 4.06E-03 | -1.6 |
| NM_175325    | <i>Bbs4</i>          | BXD2 | 1.65E-02 | 1.3  | NS       | NS   |
| NM_001284410 | <i>Bcl2l11</i>       | BXD2 | 7.99E-05 | 2.4  | 1.88E-03 | 2.2  |
| NM_029933    | <i>Bcl9</i>          | BXD2 | 2.73E-02 | -1.3 | NS       | NS   |
| NM_001141922 | <i>Bean1</i>         | BXD2 | NS       | NS   | 3.79E-02 | -1.4 |
| NM_173404    | <i>Bmp3</i>          | BXD2 | 1.85E-02 | -1.8 | NS       | NS   |
| NM_007570    | <i>Btg2</i>          | BXD2 | 6.13E-06 | 2.3  | 1.30E-02 | 1.8  |
| NM_009779    | <i>C3ar1</i>         | BXD2 | NS       | NS   | 2.78E-02 | 1.8  |
| NM_144817    | <i>Camk1g</i>        | BXD2 | 2.70E-02 | -1.4 | NS       | NS   |

|              |                |      |          |      |          |      |
|--------------|----------------|------|----------|------|----------|------|
| NM_177716    | <i>Ccdc184</i> | BXD2 | 2.76E-02 | -1.5 | NS       | NS   |
| NM_144820    | <i>Ccdc28a</i> | BXD2 | 4.92E-02 | 1.8  | NS       | NS   |
| NM_007681    | <i>Cenpa</i>   | BXD2 | 2.80E-02 | 1.7  | NS       | NS   |
| NM_001159364 | <i>Cep97</i>   | BXD2 | 3.44E-02 | 1.6  | NS       | NS   |
| NM_001081345 | <i>Chd2</i>    | BXD2 | 3.73E-02 | 1.4  | NS       | NS   |
| NM_025854    | <i>Cir1</i>    | BXD2 | 1.51E-03 | 1.5  | NS       | NS   |
| NM_001243762 | <i>Clcn5</i>   | BXD2 | 2.76E-02 | 1.6  | 2.05E-02 | 1.7  |
| NM_024217    | <i>Cmtm3</i>   | BXD2 | NS       | NS   | 2.82E-02 | 1.4  |
| NM_001163126 | <i>Cog5</i>    | BXD2 | 4.21E-02 | 1.4  | NS       | NS   |
| NM_009898    | <i>Coro1a</i>  | BXD2 | 4.15E-02 | -1.6 | NS       | NS   |
| NM_001252525 | <i>Cpeb1</i>   | BXD2 | 1.06E-02 | 2.0  | NS       | NS   |
| NM_172728    | <i>Creb5</i>   | BXD2 | 3.79E-03 | 2.0  | NS       | NS   |
| NM_001110850 | <i>Crem</i>    | BXD2 | 2.89E-04 | 2.0  | NS       | NS   |
| NM_007762    | <i>Crhr1</i>   | BXD2 | 1.07E-04 | -2.2 | 2.82E-02 | -1.7 |
| NM_016748    | <i>Ctps</i>    | BXD2 | NS       | NS   | 4.57E-02 | -1.5 |
| NM_009994    | <i>Cyp1b1</i>  | BXD2 | NS       | NS   | 2.78E-02 | 2.2  |
| NM_028979    | <i>Cyp2j9</i>  | BXD2 | 3.38E-03 | 1.9  | 4.57E-02 | 1.7  |
| NM_001285947 | <i>Cyp39a1</i> | BXD2 | 3.99E-02 | 1.8  | NS       | NS   |
| NM_020010    | <i>Cyp51</i>   | BXD2 | 2.07E-03 | -1.5 | 1.23E-03 | -1.5 |
| NM_010516    | <i>Cyr61</i>   | BXD2 | NS       | NS   | 1.86E-02 | 1.8  |
| NM_001252457 | <i>Ddx39b</i>  | BXD2 | 4.92E-02 | -1.3 | NS       | NS   |
| NM_172733    | <i>Dera</i>    | BXD2 | 4.48E-03 | 1.9  | NS       | NS   |
| NM_053272    | <i>Dhcr24</i>  | BXD2 | 1.83E-10 | -1.9 | 5.57E-03 | -1.4 |
| NM_001163026 | <i>Dnajc13</i> | BXD2 | 1.43E-02 | -1.5 | NS       | NS   |
| NM_009584    | <i>Dnajc2</i>  | BXD2 | 2.70E-02 | -1.4 | 2.67E-02 | -1.5 |
| NM_001285807 | <i>Dtna</i>    | BXD2 | 4.11E-04 | 1.4  | NS       | NS   |
| NM_013642    | <i>Dusp1</i>   | BXD2 | 3.74E-08 | 2.5  | 1.46E-06 | 2.3  |
| NM_001048054 | <i>Dusp16</i>  | BXD2 | 1.62E-03 | 2.0  | 1.36E-02 | 1.8  |
| NM_008748    | <i>Dusp8</i>   | BXD2 | 3.77E-06 | 1.5  | 6.93E-03 | 1.4  |
| NM_010104    | <i>Edn1</i>    | BXD2 | 2.70E-02 | 2.4  | NS       | NS   |
| NM_001289925 | <i>Egr3</i>    | BXD2 | 1.27E-02 | -1.8 | 1.41E-02 | -1.9 |
| NM_198303    | <i>Eif5b</i>   | BXD2 | NS       | NS   | 3.24E-02 | -1.4 |
| NM_001253692 | <i>Elmod3</i>  | BXD2 | 3.72E-03 | 1.6  | 2.05E-02 | 1.5  |
| NM_130450    | <i>Elovl6</i>  | BXD2 | NS       | NS   | 2.05E-02 | -1.4 |
| NM_023794    | <i>Etv5</i>    | BXD2 | 1.86E-02 | -1.6 | NS       | NS   |
| NM_183187    | <i>Fam107a</i> | BXD2 | 3.40E-07 | 3.9  | 1.46E-03 | 2.6  |
| NM_178908    | <i>Fam26e</i>  | BXD2 | 4.92E-02 | 1.6  | 5.70E-03 | 1.8  |
| NM_175104    | <i>Fam53c</i>  | BXD2 | 4.73E-04 | 2.0  | 2.66E-02 | 1.7  |



|              |                 |      |          |      |          |      |
|--------------|-----------------|------|----------|------|----------|------|
| NM_178797    | <i>Far2</i>     | BXD2 | NS       | NS   | 1.70E-03 | -1.5 |
| NM_026346    | <i>Fbxo32</i>   | BXD2 | 8.64E-03 | 2.1  | NS       | NS   |
| NM_010191    | <i>Fdft1</i>    | BXD2 | 1.35E-07 | -1.6 | 1.34E-06 | -1.6 |
| NM_001253751 | <i>Fdps</i>     | BXD2 | 2.85E-02 | -1.5 | NS       | NS   |
| NM_001163215 | <i>Fgfr3</i>    | BXD2 | 6.85E-04 | 1.9  | 1.41E-02 | 1.7  |
| NM_001164259 | <i>Fgfrl1</i>   | BXD2 | 3.32E-02 | -1.5 | NS       | NS   |
| NM_022009    | <i>Flii</i>     | BXD2 | NS       | NS   | 1.26E-02 | -1.6 |
| NM_001159706 | <i>Folh1</i>    | BXD2 | 1.71E-02 | 2.0  | NS       | NS   |
| NM_028058    | <i>Fundc1</i>   | BXD2 | 3.73E-02 | 1.4  | NS       | NS   |
| NM_028022    | <i>Gatsl3</i>   | BXD2 | 2.80E-02 | 2.0  | 4.57E-02 | 2.0  |
| ENSMUST0000  |                 |      |          |      |          | NS   |
| 0178468      | <i>Gm21907</i>  | BXD2 | 1.68E-02 | 2.6  | NS       |      |
| NM_001035122 | <i>Golm1</i>    | BXD2 | 3.98E-02 | 1.5  | NS       | NS   |
| NM_027518    | <i>Gpr137c</i>  | BXD2 | 9.10E-08 | 2.1  | 1.14E-08 | 2.3  |
| NM_010338    | <i>Gpr37</i>    | BXD2 | 7.38E-03 | 1.7  | NS       | NS   |
| NM_010287    | <i>Gpr83</i>    | BXD2 | 2.90E-02 | 2.1  | NS       | NS   |
| NM_145066    | <i>Gpr85</i>    | BXD2 | 4.21E-02 | 1.4  | NS       | NS   |
| NM_153419    | <i>Grwd1</i>    | BXD2 | 3.09E-02 | -1.8 | NS       | NS   |
| NM_008185    | <i>Gstt1</i>    | BXD2 | NS       | NS   | 2.20E-02 | 1.9  |
| NM_198962    | <i>Hcrtr2</i>   | BXD2 | 3.69E-02 | -1.7 | NS       | NS   |
| NM_010422    | <i>Hexb</i>     | BXD2 | NS       | NS   | 4.57E-02 | 1.4  |
| NM_008252    | <i>Hmgb2</i>    | BXD2 | 8.40E-04 | 1.9  | NS       | NS   |
| NM_008255    | <i>Hmgcr</i>    | BXD2 | 3.40E-07 | -2.0 | 5.33E-03 | -1.6 |
| NM_013751    | <i>Hrasls</i>   | BXD2 | 4.68E-02 | 1.8  | NS       | NS   |
| NM_053262    | <i>Hsd17b11</i> | BXD2 | 2.49E-02 | 1.5  | NS       | NS   |
| NM_010476    | <i>Hsd17b7</i>  | BXD2 | 6.62E-07 | -2.0 | 1.13E-05 | -1.9 |
| NM_001002012 | <i>Hspa2</i>    | BXD2 | 3.79E-03 | 1.8  | NS       | NS   |
| NM_008300    | <i>Hspa4</i>    | BXD2 | 2.70E-02 | -1.3 | NS       | NS   |
| NM_019564    | <i>Htra1</i>    | BXD2 | 7.52E-03 | 1.7  | NS       | NS   |
| NM_031166    | <i>Id4</i>      | BXD2 | 1.65E-02 | 2.1  | NS       | NS   |
| NM_145360    | <i>Idi1</i>     | BXD2 | 1.20E-07 | -2.1 | 4.36E-07 | -2.1 |
| NM_001162884 | <i>Igsf10</i>   | BXD2 | NS       | NS   | 2.82E-02 | 1.7  |
| NM_008360    | <i>Il18</i>     | BXD2 | 1.02E-02 | 1.4  | NS       | NS   |
| NM_016671    | <i>Il27ra</i>   | BXD2 | 1.85E-03 | -1.9 | NS       | NS   |
| NM_023626    | <i>Ing3</i>     | BXD2 | 1.49E-04 | 1.6  | NS       | NS   |
| NM_153526    | <i>Insig1</i>   | BXD2 | 1.66E-07 | -2.4 | 1.46E-06 | -2.3 |
| NM_010591    | <i>Jun</i>      | BXD2 | 8.98E-14 | 3.4  | 1.93E-09 | 2.7  |
| NM_001286944 | <i>Jund</i>     | BXD2 | 2.58E-04 | 1.7  | 5.16E-03 | 1.6  |

|              |                 |      |          |      |          |      |
|--------------|-----------------|------|----------|------|----------|------|
| NM_001008785 | <i>Kbtbd8</i>   | BXD2 | 3.19E-02 | -1.9 | NS       | NS   |
| NM_001081134 | <i>Kcng1</i>    | BXD2 | 4.73E-04 | -2.1 | 4.87E-02 | -1.7 |
| NM_172898    | <i>Kirrel2</i>  | BXD2 | 1.13E-02 | 1.9  | NS       | NS   |
| NM_078477    | <i>Klf16</i>    | BXD2 | 1.76E-03 | -1.7 | 2.14E-02 | -1.6 |
| NM_008457    | <i>Klk1b8</i>   | BXD2 | NS       | NS   | 1.95E-02 | 1.7  |
| NM_010655    | <i>Kpna2</i>    | BXD2 | NS       | NS   | 3.18E-02 | -1.5 |
| NM_001252658 | <i>Ldlr</i>     | BXD2 | 2.07E-05 | -2.5 | 3.02E-05 | -2.5 |
| NM_008494    | <i>Lfn3</i>     | BXD2 | 3.72E-03 | 1.6  | NS       | NS   |
| NM_001113545 | <i>Lima1</i>    | BXD2 | 3.32E-02 | 1.6  | NS       | NS   |
| NM_144862    | <i>Lims2</i>    | BXD2 | 4.49E-02 | 1.9  | NS       | NS   |
| NM_177250    | <i>Lingo4</i>   | BXD2 | 1.73E-02 | 1.5  | NS       | NS   |
| NM_201529    | <i>Lmo7</i>     | BXD2 | 4.61E-02 | 1.4  | NS       | NS   |
| NM_181470    | <i>Ltv1</i>     | BXD2 | 1.73E-02 | -1.7 | NS       | NS   |
| NM_001252055 | <i>Ly6c1</i>    | BXD2 | 4.96E-02 | 2.0  | NS       | NS   |
| NM_001045483 | <i>Mapk1ip1</i> | BXD2 | 5.39E-03 | 1.4  | 3.29E-02 | 1.4  |
| NM_016977    | <i>Mc4r</i>     | BXD2 | 1.10E-02 | 2.4  | NS       | NS   |
| NM_008587    | <i>Mertk</i>    | BXD2 | 4.23E-02 | 1.9  | 2.82E-02 | 2.0  |
| NM_026197    | <i>Mettl16</i>  | BXD2 | NS       | NS   | 2.82E-02 | -1.6 |
| NM_001252094 | <i>Mettl20</i>  | BXD2 | 2.76E-02 | 2.0  | NS       | NS   |
| NM_029662    | <i>Mfsd2a</i>   | BXD2 | 3.44E-02 | 1.6  | NS       | NS   |
| NM_001243584 | <i>Mif4gd</i>   | BXD2 | 1.96E-03 | 1.9  | NS       | NS   |
| NM_025436    | <i>Msmo1</i>    | BXD2 | 6.62E-07 | -2.4 | 4.36E-07 | -2.5 |
| NM_013602    | <i>Mt1</i>      | BXD2 | 3.62E-04 | 1.7  | 2.47E-04 | 1.7  |
| NM_008630    | <i>Mt2</i>      | BXD2 | 2.35E-06 | 2.7  | 1.48E-05 | 2.6  |
| NM_178051    | <i>Mterf4</i>   | BXD2 | 1.88E-02 | 1.6  | NS       | NS   |
| NM_138656    | <i>Mvd</i>      | BXD2 | 1.84E-05 | -2.2 | 2.45E-06 | -2.4 |
| NM_001008542 | <i>Mxi1</i>     | BXD2 | 8.64E-07 | 1.8  | 4.89E-05 | 1.6  |
| NM_001162417 | <i>Myef2</i>    | BXD2 | NS       | NS   | 4.32E-02 | -1.3 |
| NM_001040395 | <i>Nadk2</i>    | BXD2 | 5.03E-05 | 1.6  | NS       | NS   |
| NM_023239    | <i>Ndnf2</i>    | BXD2 | 7.47E-03 | 1.8  | NS       | NS   |
| NM_001145959 | <i>Ndr2</i>     | BXD2 | NS       | NS   | 2.78E-02 | 1.3  |
| NM_026742    | <i>Ndufa4</i>   | BXD2 | 9.35E-03 | -1.5 | NS       | NS   |
| NM_028757    | <i>Nefl</i>     | BXD2 | 2.93E-02 | 1.7  | NS       | NS   |
| NM_145469    | <i>Nipal2</i>   | BXD2 | 3.67E-02 | 1.5  | NS       | NS   |
| NM_001033367 | <i>Nlrc4</i>    | BXD2 | 4.68E-02 | 1.7  | NS       | NS   |
| NM_138314    | <i>Nme7</i>     | BXD2 | 1.03E-02 | 1.5  | NS       | NS   |
| NM_010941    | <i>Nsdhl</i>    | BXD2 | NS       | NS   | 3.62E-04 | -1.5 |
| NM_001161430 | <i>Nxt2</i>     | BXD2 | 2.80E-02 | 1.4  | NS       | NS   |

|              |                 |      |          |      |          |      |
|--------------|-----------------|------|----------|------|----------|------|
| NM_178644    | <i>Oaf</i>      | BXD2 | 6.09E-03 | 2.2  | 1.59E-02 | 2.1  |
| NM_146921    | <i>Olfr1</i>    | BXD2 | 4.11E-02 | -1.7 | NS       | NS   |
| NM_146742    | <i>Olfr1316</i> | BXD2 | NS       | NS   | 6.77E-03 | -2.1 |
| NM_146583    | <i>Olfr52</i>   | BXD2 | 1.43E-03 | -2.1 | NS       | NS   |
| NM_146955    | <i>Olfr60</i>   | BXD2 | NS       | NS   | 3.56E-02 | -1.8 |
| NM_019409    | <i>Omg</i>      | BXD2 | 1.43E-02 | 1.4  | NS       | NS   |
| NM_001134791 | <i>Osbp19</i>   | BXD2 | 1.07E-04 | 1.5  | 7.38E-05 | 1.5  |
| NM_028829    | <i>Paqr8</i>    | BXD2 | 2.76E-02 | 1.4  | 4.87E-02 | 1.4  |
| NM_001177980 | <i>Pde4b</i>    | BXD2 | 1.51E-02 | 1.4  | NS       | NS   |
| NM_025954    | <i>Pgp</i>      | BXD2 | NS       | NS   | 4.81E-02 | -1.5 |
| NM_178149    | <i>Pik3ip1</i>  | BXD2 | 2.63E-06 | 2.4  | NS       | NS   |
| NM_001024955 | <i>Pik3r1</i>   | BXD2 | 1.38E-08 | 1.8  | 2.12E-06 | 1.6  |
| NM_181585    | <i>Pik3r3</i>   | BXD2 | 4.79E-03 | 1.5  | NS       | NS   |
| NM_001033253 | <i>Plekhg1</i>  | BXD2 | 1.30E-04 | 1.9  | 9.22E-05 | 2.0  |
| NM_013807    | <i>Plk3</i>     | BXD2 | 3.64E-03 | -1.7 | 6.44E-03 | -1.7 |
| NM_133249    | <i>Ppargc1b</i> | BXD2 | NS       | NS   | 4.57E-02 | -1.7 |
| NM_145404    | <i>Prmt7</i>    | BXD2 | 4.80E-02 | -1.4 | NS       | NS   |
| NM_201371    | <i>Prmt8</i>    | BXD2 | NS       | NS   | 1.26E-02 | -1.3 |
| NM_011201    | <i>Ptpn1</i>    | BXD2 | 7.63E-03 | -1.4 | NS       | NS   |
| NM_133198    | <i>Pygl</i>     | BXD2 | NS       | NS   | 2.82E-02 | 1.9  |
| NM_029494    | <i>Rab30</i>    | BXD2 | 2.93E-06 | 1.9  | 6.77E-03 | 1.6  |
| NM_001038621 | <i>Rabgap11</i> | BXD2 | 1.05E-03 | 1.4  | 1.88E-02 | 1.3  |
| NM_001099624 | <i>Rapgef2</i>  | BXD2 | 2.50E-06 | 1.6  | 1.67E-06 | 1.7  |
| NM_001252494 | <i>Rapgef6</i>  | BXD2 | 1.19E-06 | 2.1  | 1.47E-03 | 1.7  |
| NM_009025    | <i>Rasa3</i>    | BXD2 | 2.60E-02 | -1.5 | NS       | NS   |
| NM_178045    | <i>Rassf4</i>   | BXD2 | NS       | NS   | 1.91E-02 | 1.8  |
| NM_001081549 | <i>Rcan1</i>    | BXD2 | 2.76E-02 | 1.4  | NS       | NS   |
| NM_153514    | <i>Rhobtb2</i>  | BXD2 | NS       | NS   | 2.81E-02 | -1.5 |
| NM_030259    | <i>Rilpl2</i>   | BXD2 | 3.73E-02 | 1.6  | NS       | NS   |
| NM_001081977 | <i>Rnf144a</i>  | BXD2 | 3.64E-02 | 1.4  | NS       | NS   |
| NM_001166553 | <i>Rnf145</i>   | BXD2 | 2.07E-03 | -1.5 | NS       | NS   |
| NM_001163461 | <i>Rpap2</i>    | BXD2 | 1.72E-02 | 1.5  | NS       | NS   |
| NM_133982    | <i>Rpp25</i>    | BXD2 | 7.61E-03 | -1.7 | 1.30E-03 | -1.9 |
| NM_146244    | <i>Rps6kl1</i>  | BXD2 | 6.78E-07 | 2.4  | 5.16E-03 | 1.8  |
| NM_007901    | <i>S1pr1</i>    | BXD2 | 4.23E-02 | 1.6  | NS       | NS   |
| NM_172769    | <i>Sc5d</i>     | BXD2 | NS       | NS   | 2.05E-02 | -1.3 |
| NM_172604    | <i>Scara3</i>   | BXD2 | NS       | NS   | 4.32E-02 | 1.5  |
| NM_009127    | <i>Scd1</i>     | BXD2 | 4.23E-02 | -1.5 | NS       | NS   |

|              |                 |      |          |      |          |      |
|--------------|-----------------|------|----------|------|----------|------|
| NM_009129    | <i>Scg2</i>     | BXD2 | 6.30E-03 | 1.4  | NS       | NS   |
| NM_011521    | <i>Sdc4</i>     | BXD2 | 1.16E-02 | 2.0  | 1.36E-02 | 2.0  |
| NM_011342    | <i>Sec22b</i>   | BXD2 | 4.90E-02 | 1.4  | NS       | NS   |
| NM_030261    | <i>Sesn3</i>    | BXD2 | 4.79E-03 | 1.5  | 1.25E-02 | 1.4  |
| NM_009167    | <i>Shc3</i>     | BXD2 | 5.35E-04 | -1.5 | NS       | NS   |
| NM_013612    | <i>Slc11a1</i>  | BXD2 | NS       | NS   | 8.62E-03 | 2.0  |
| NM_027921    | <i>Slc16a14</i> | BXD2 | 3.79E-03 | 1.6  | NS       | NS   |
| NM_001159593 | <i>Slc20a1</i>  | BXD2 | 9.74E-04 | -1.5 | NS       | NS   |
| NM_011400    | <i>Slc2a1</i>   | BXD2 | 7.38E-03 | 1.8  | 4.07E-02 | 1.6  |
| NM_001012305 | <i>Slc39a12</i> | BXD2 | NS       | NS   | 1.42E-02 | 1.7  |
| NM_001199283 | <i>Slc43a2</i>  | BXD2 | NS       | NS   | 3.83E-02 | 1.5  |
| NM_001081263 | <i>Slc44a5</i>  | BXD2 | 1.38E-05 | 1.9  | 1.30E-02 | 1.5  |
| NM_001038643 | <i>Slco3a1</i>  | BXD2 | 7.69E-03 | -1.5 | NS       | NS   |
| NM_001177833 | <i>Smox</i>     | BXD2 | 2.52E-02 | 1.5  | NS       | NS   |
| NM_183316    | <i>Snapc5</i>   | BXD2 | 1.10E-02 | 1.6  | NS       | NS   |
| NM_009238    | <i>Sox4</i>     | BXD2 | 3.17E-02 | 1.5  | 3.62E-02 | 1.5  |
| NM_182927    | <i>Spred3</i>   | BXD2 | 7.42E-04 | -2.2 | 4.47E-03 | -2.1 |
| NM_011898    | <i>Spry4</i>    | BXD2 | 1.39E-02 | -1.8 | 2.82E-02 | -1.7 |
| NM_009270    | <i>Sqle</i>     | BXD2 | 1.29E-04 | -1.7 | 8.50E-06 | -1.8 |
| NM_011358    | <i>Srsf2</i>    | BXD2 | 2.27E-02 | -1.4 | 1.95E-02 | -1.5 |
| NM_001195485 | <i>Srsf7</i>    | BXD2 | 3.17E-02 | -1.6 | 2.19E-02 | -1.6 |
| NM_133774    | <i>Stard4</i>   | BXD2 | 9.74E-04 | -1.9 | 4.89E-05 | -2.1 |
| NM_001102423 | <i>Stx16</i>    | BXD2 | 4.93E-02 | 1.4  | NS       | NS   |
| NM_001040085 | <i>Sytl2</i>    | BXD2 | 3.67E-02 | 1.7  | NS       | NS   |
| NM_001184706 | <i>Tfdp2</i>    | BXD2 | 4.43E-02 | 1.6  | NS       | NS   |
| NM_026436    | <i>Tmem86a</i>  | BXD2 | NS       | NS   | 4.57E-02 | 1.6  |
| NM_001048267 | <i>Tnpo1</i>    | BXD2 | 4.23E-02 | 1.4  | 2.05E-02 | 1.4  |
| NM_001109748 | <i>Tomm40</i>   | BXD2 | 4.19E-02 | -1.4 | 1.71E-03 | -1.5 |
| NM_001170488 | <i>Tprkb</i>    | BXD2 | 4.92E-02 | 1.5  | NS       | NS   |
| NM_001243916 | <i>Trim34b</i>  | BXD2 | 3.06E-02 | 1.7  | NS       | NS   |
| NM_001170912 | <i>Trim66</i>   | BXD2 | 4.31E-02 | 2.1  | NS       | NS   |
| NM_001099792 | <i>Trmt61a</i>  | BXD2 | NS       | NS   | 3.31E-02 | -1.6 |
| NM_172597    | <i>Txndc16</i>  | BXD2 | 7.63E-03 | 1.5  | NS       | NS   |
| NM_001009935 | <i>Txnip</i>    | BXD2 | 2.05E-05 | 3.4  | 6.43E-05 | 3.3  |
| NM_133806    | <i>Uap1</i>     | BXD2 | 4.80E-02 | -1.3 | NS       | NS   |
| NM_001169576 | <i>Ube2h</i>    | BXD2 | 2.30E-03 | 1.5  | 5.16E-03 | 1.5  |
| NM_001145162 | <i>Ube2ql1</i>  | BXD2 | NS       | NS   | 2.09E-02 | -1.3 |
| NM_030724    | <i>Uck2</i>     | BXD2 | 2.32E-03 | -1.4 | NS       | NS   |

|              |                      |        |          |      |          |      |
|--------------|----------------------|--------|----------|------|----------|------|
| NM_175158    | <i>Utp20</i>         | BXD2   | NS       | NS   | 2.82E-02 | -1.7 |
| NM_001039385 | <i>Vgf</i>           | BXD2   | 9.50E-03 | -2.1 | 3.83E-02 | -1.9 |
| NM_001005342 | <i>Ypel4</i>         | BXD2   | 6.22E-04 | 2.5  | 4.45E-03 | 2.3  |
| NM_027166    | <i>Ypel5</i>         | BXD2   | 7.14E-03 | 1.4  | NS       | NS   |
| NM_028106    | <i>Zbed3</i>         | BXD2   | 4.31E-02 | 1.5  | NS       | NS   |
| NM_001115130 | <i>Zbtb44</i>        | BXD2   | 9.55E-03 | 1.4  | NS       | NS   |
| NM_178404    | <i>Zc3h6</i>         | BXD2   | 7.99E-03 | 1.5  | NS       | NS   |
| NM_144546    | <i>Zfp119a</i>       | BXD2   | 4.20E-02 | 1.5  | NS       | NS   |
| NM_001110309 | <i>Zfp426</i>        | BXD2   | 2.76E-02 | 1.5  | NS       | NS   |
| NM_001267583 | <i>Zfp811</i>        | BXD2   | 1.51E-02 | 1.6  | NS       | NS   |
| NM_001105557 | <i>Zfp938</i>        | BXD2   | 3.44E-02 | 1.4  | NS       | NS   |
| NM_001252584 | <i>Zmynd8</i>        | BXD2   | 1.77E-02 | 1.6  | NS       | NS   |
| NM_029598    | <i>1700019B03Rik</i> | BXD48a | 4.63E-02 | 1.6  | NS       | NS   |
| NM_001033630 | <i>2310061I04Rik</i> | BXD48a | 4.42E-02 | -1.4 | NS       | NS   |
| NR_045177    | <i>2900055J20Rik</i> | BXD48a | 3.77E-02 | 1.5  | 9.99E-03 | 1.6  |
| NM_026077    | <i>3110040N11Rik</i> | BXD48a | NS       | NS   | 5.00E-02 | 1.5  |
| NR_015591    | <i>5430405H02Rik</i> | BXD48a | 1.59E-03 | 2.2  | NS       | NS   |
| NR_015488    | <i>A930003A15Rik</i> | BXD48a | 2.46E-02 | 1.9  | NS       | NS   |
| NM_030210    | <i>Aacs</i>          | BXD48a | NS       | NS   | 7.83E-03 | -1.6 |
| NM_001166556 | <i>Abca6</i>         | BXD48a | 1.61E-03 | 2.6  | NS       | NS   |
| NM_013851    | <i>Abca8b</i>        | BXD48a | NS       | NS   | 6.12E-03 | 2.0  |
| NM_011076    | <i>Abcb1a</i>        | BXD48a | NS       | NS   | 3.06E-02 | 1.7  |
| NM_001276719 | <i>Ackr2</i>         | BXD48a | NS       | NS   | 2.91E-02 | -1.9 |
| NM_001199296 | <i>Acly</i>          | BXD48a | NS       | NS   | 3.29E-02 | -1.3 |
| NM_001102404 | <i>Acp5</i>          | BXD48a | NS       | NS   | 1.06E-02 | -3.4 |
| NM_007981    | <i>Acs11</i>         | BXD48a | 5.57E-03 | 1.7  | NS       | NS   |
| NM_020330    | <i>Adam21</i>        | BXD48a | NS       | NS   | 8.74E-03 | -2.1 |
| NM_001270996 | <i>Adam9</i>         | BXD48a | NS       | NS   | 4.64E-02 | 1.3  |
| NM_172133    | <i>Adap2</i>         | BXD48a | 4.91E-03 | 1.7  | NS       | NS   |
| NM_133222    | <i>Adgrl4</i>        | BXD48a | NS       | NS   | 1.63E-02 | 1.4  |
| NM_026644    | <i>Agpat4</i>        | BXD48a | 2.37E-02 | 1.4  | NS       | NS   |
| NM_001172146 | <i>Aimp2</i>         | BXD48a | 6.82E-03 | -1.8 | 1.17E-03 | -1.9 |
| NM_001035532 | <i>Akap2</i>         | BXD48a | 3.50E-03 | 1.6  | NS       | NS   |
| NM_025538    | <i>Alkbh7</i>        | BXD48a | 4.47E-02 | -1.5 | NS       | NS   |
| NM_019764    | <i>Amotl2</i>        | BXD48a | 4.65E-04 | 2.1  | NS       | NS   |
| NM_020581    | <i>Angptl4</i>       | BXD48a | 1.05E-03 | 2.3  | 1.23E-03 | 2.2  |
| NM_027799    | <i>Ankrd40</i>       | BXD48a | 4.98E-02 | 1.4  | NS       | NS   |
| NM_001198911 | <i>Arhgef2</i>       | BXD48a | 3.23E-02 | -1.4 | NS       | NS   |

|              |                |        |          |      |          |      |
|--------------|----------------|--------|----------|------|----------|------|
| NM_175251    | <i>Arid2</i>   | BXD48a | 1.24E-02 | 1.5  | NS       | NS   |
| NM_001172205 | <i>Arid5a</i>  | BXD48a | 2.14E-02 | 1.9  | 2.05E-02 | 1.9  |
| NM_023598    | <i>Arid5b</i>  | BXD48a | 1.89E-03 | 1.6  | 1.39E-04 | 1.8  |
| NM_001042591 | <i>Arrdc3</i>  | BXD48a | 5.16E-08 | 2.9  | 3.63E-07 | 2.7  |
| NM_001042592 | <i>Arrdc4</i>  | BXD48a | 5.48E-05 | 2.1  | 8.41E-03 | 1.7  |
| NM_009713    | <i>Arsa</i>    | BXD48a | 1.20E-02 | 1.8  | NS       | NS   |
| NM_026217    | <i>Atg12</i>   | BXD48a | 6.28E-06 | 1.6  | 1.72E-03 | 1.4  |
| NM_001199304 | <i>Atxn1</i>   | BXD48a | NS       | NS   | 2.47E-02 | 1.4  |
| NM_009125    | <i>Atxn2</i>   | BXD48a | NS       | NS   | 3.17E-02 | -1.3 |
| NM_016847    | <i>Avpr1a</i>  | BXD48a | NS       | NS   | 5.05E-03 | -1.9 |
| NM_001159407 | <i>B3gnt5</i>  | BXD48a | 5.68E-04 | 1.9  | 2.22E-02 | 1.6  |
| NM_175325    | <i>Bbs4</i>    | BXD48a | 1.20E-02 | 1.4  | NS       | NS   |
| NM_001284410 | <i>Bcl2l11</i> | BXD48a | 4.15E-05 | 2.5  | 9.55E-05 | 2.4  |
| NM_001122683 | <i>Bdh1</i>    | BXD48a | 1.24E-02 | -1.4 | 3.61E-02 | -1.3 |
| NM_133889    | <i>Bsdc1</i>   | BXD48a | NS       | NS   | 5.31E-03 | 1.4  |
| NM_007570    | <i>Btg2</i>    | BXD48a | 1.72E-05 | 2.2  | 1.96E-02 | 1.7  |
| NM_009770    | <i>Btg3</i>    | BXD48a | 2.96E-02 | 1.7  | NS       | NS   |
| NM_001172096 | <i>Cacul1</i>  | BXD48a | NS       | NS   | 2.72E-02 | 1.4  |
| NM_144817    | <i>Camk1g</i>  | BXD48a | 1.44E-02 | -1.5 | 2.05E-02 | -1.4 |
| NM_025821    | <i>Carhsp1</i> | BXD48a | 3.77E-02 | 1.6  | NS       | NS   |
| NM_178793    | <i>Ccbe1</i>   | BXD48a | 3.50E-03 | 1.9  | NS       | NS   |
| NM_009831    | <i>Ccng1</i>   | BXD48a | 2.17E-02 | 1.4  | 4.96E-03 | 1.4  |
| NM_007635    | <i>Ccng2</i>   | BXD48a | NS       | NS   | 3.72E-02 | 1.5  |
| NM_025422    | <i>Cd302</i>   | BXD48a | NS       | NS   | 3.92E-04 | 2.1  |
| NM_001168304 | <i>Cdk19</i>   | BXD48a | 4.41E-03 | 1.5  | NS       | NS   |
| NM_009875    | <i>Cdkn1b</i>  | BXD48a | 1.90E-03 | 1.5  | NS       | NS   |
| NM_001081345 | <i>Chd2</i>    | BXD48a | 2.04E-02 | 1.5  | 7.35E-03 | 1.5  |
| NM_007692    | <i>Chkb</i>    | BXD48a | NS       | NS   | 4.25E-02 | -1.4 |
| NM_053068    | <i>Chrac1</i>  | BXD48a | 3.78E-02 | 1.7  | NS       | NS   |
| NM_203491    | <i>Chrm2</i>   | BXD48a | 1.36E-02 | -1.7 | NS       | NS   |
| NM_176844    | <i>Chrna5</i>  | BXD48a | 3.98E-03 | 1.9  | NS       | NS   |
| NM_021528    | <i>Chst12</i>  | BXD48a | 2.03E-03 | -1.6 | NS       | NS   |
| NM_001243762 | <i>Clcn5</i>   | BXD48a | 1.97E-03 | 1.8  | 4.59E-02 | 1.6  |
| NM_001033242 | <i>Cln5</i>    | BXD48a | 1.20E-02 | 2.0  | 5.05E-03 | 2.2  |
| NM_001033175 | <i>Cln6</i>    | BXD48a | NS       | NS   | 4.79E-02 | 1.5  |
| NM_153384    | <i>Clrn1</i>   | BXD48a | 2.51E-03 | 1.9  | NS       | NS   |
| NM_001252525 | <i>Cpeb1</i>   | BXD48a | NS       | NS   | 1.63E-02 | 1.9  |
| NM_172728    | <i>Creb5</i>   | BXD48a | NS       | NS   | 3.56E-02 | 1.8  |

|              |                |        |          |      |          |      |
|--------------|----------------|--------|----------|------|----------|------|
| NM_029870    | <i>Crebrf</i>  | BXD48a | NS       | NS   | 4.88E-02 | 1.6  |
| NM_001110850 | <i>Crem</i>    | BXD48a | 7.61E-04 | 1.9  | 2.42E-04 | 2.0  |
| NM_007762    | <i>Crhr1</i>   | BXD48a | 5.17E-03 | -1.9 | 4.87E-06 | -2.5 |
| NM_007773    | <i>Crybb2</i>  | BXD48a | 2.96E-02 | -1.7 | NS       | NS   |
| NM_031249    | <i>Cstf2t</i>  | BXD48a | 4.98E-02 | -1.4 | NS       | NS   |
| NM_001145799 | <i>Ctla2a</i>  | BXD48a | 4.31E-02 | 1.7  | 8.42E-04 | 2.1  |
| NM_007808    | <i>Cycs</i>    | BXD48a | 2.99E-02 | -1.2 | NS       | NS   |
| NM_009994    | <i>Cyp1b1</i>  | BXD48a | NS       | NS   | 4.07E-03 | 2.4  |
| NM_028979    | <i>Cyp2j9</i>  | BXD48a | NS       | NS   | 1.93E-02 | 1.7  |
| NM_001100181 | <i>Cyp4a32</i> | BXD48a | NS       | NS   | 1.02E-02 | -1.9 |
| NM_010516    | <i>Cyr61</i>   | BXD48a | 1.05E-02 | 1.8  | NS       | NS   |
| NM_001008231 | <i>Daam2</i>   | BXD48a | NS       | NS   | 2.97E-02 | 1.5  |
| NM_001142570 | <i>Dach2</i>   | BXD48a | 3.77E-02 | 1.9  | NS       | NS   |
| NM_001161515 | <i>Dctd</i>    | BXD48a | NS       | NS   | 4.79E-02 | -1.6 |
| NM_019553    | <i>Ddx21</i>   | BXD48a | NS       | NS   | 4.79E-02 | -1.5 |
| NM_001252457 | <i>Ddx39b</i>  | BXD48a | 1.22E-02 | -1.3 | NS       | NS   |
| NM_011933    | <i>Decr2</i>   | BXD48a | 4.31E-02 | 1.4  | NS       | NS   |
| NM_053272    | <i>Dhcr24</i>  | BXD48a | 6.89E-07 | -1.7 | 3.70E-07 | -1.7 |
| NM_001030307 | <i>Dkc1</i>    | BXD48a | NS       | NS   | 8.25E-03 | -2.4 |
| NR_002854    | <i>Dlx1as</i>  | BXD48a | NS       | NS   | 1.33E-02 | -2.0 |
| NM_025926    | <i>Dnajb4</i>  | BXD48a | 1.07E-02 | 1.4  | 6.50E-03 | 1.4  |
| NM_025274    | <i>Dppa5a</i>  | BXD48a | 2.81E-02 | -1.8 | NS       | NS   |
| NM_001285807 | <i>Dtna</i>    | BXD48a | 2.20E-03 | 1.4  | 1.23E-03 | 1.4  |
| NM_172442    | <i>Dtx4</i>    | BXD48a | 4.66E-03 | 1.4  | NS       | NS   |
| NM_013642    | <i>Dusp1</i>   | BXD48a | 9.78E-07 | 2.3  | 1.78E-05 | 2.1  |
| NM_001048054 | <i>Dusp16</i>  | BXD48a | 1.15E-04 | 2.2  | 2.67E-05 | 2.3  |
| NM_026268    | <i>Dusp6</i>   | BXD48a | NS       | NS   | 1.86E-03 | -1.7 |
| NM_008748    | <i>Dusp8</i>   | BXD48a | 5.60E-06 | 1.5  | 2.49E-04 | 1.4  |
| NM_010104    | <i>Edn1</i>    | BXD48a | 4.28E-03 | 2.7  | 9.87E-03 | 2.5  |
| NM_010118    | <i>Egr2</i>    | BXD48a | 1.43E-03 | 2.4  | NS       | NS   |
| NM_010121    | <i>Eif2ak3</i> | BXD48a | 3.77E-02 | 1.5  | NS       | NS   |
| NM_007917    | <i>Eif4e</i>   | BXD48a | NS       | NS   | 3.06E-02 | -1.3 |
| NM_001253692 | <i>Elmod3</i>  | BXD48a | 5.14E-03 | 1.6  | NS       | NS   |
| NM_001146348 | <i>Eng</i>     | BXD48a | 3.77E-02 | 1.7  | NS       | NS   |
| NM_007946    | <i>Epx</i>     | BXD48a | 4.50E-03 | -2.0 | NS       | NS   |
| NM_029250    | <i>Etnk1</i>   | BXD48a | NS       | NS   | 3.97E-02 | 1.4  |
| NM_008815    | <i>Etv4</i>    | BXD48a | NS       | NS   | 1.72E-03 | -1.7 |
| NM_023794    | <i>Etv5</i>    | BXD48a | 1.19E-03 | -1.8 | 2.38E-02 | -1.6 |

|              |                |        |          |      |          |      |
|--------------|----------------|--------|----------|------|----------|------|
| NM_183187    | <i>Fam107a</i> | BXD48a | 1.15E-04 | 2.9  | 3.63E-07 | 4.0  |
| NM_001100458 | <i>Fam169a</i> | BXD48a | 3.77E-02 | -1.5 | NS       | NS   |
| NM_178908    | <i>Fam26e</i>  | BXD48a | 1.61E-03 | 1.9  | 9.40E-05 | 2.1  |
| NM_175104    | <i>Fam53c</i>  | BXD48a | 6.38E-03 | 1.8  | NS       | NS   |
| NM_019643    | <i>Fam60a</i>  | BXD48a | 3.41E-02 | 1.7  | NS       | NS   |
| NM_178797    | <i>Far2</i>    | BXD48a | 6.94E-05 | -1.7 | NS       | NS   |
| NM_026346    | <i>Fbxo32</i>  | BXD48a | 2.64E-02 | 2.0  | NS       | NS   |
| NM_010191    | <i>Fdft1</i>   | BXD48a | 9.78E-07 | -1.6 | 9.55E-05 | -1.5 |
| NM_001253751 | <i>Fdps</i>    | BXD48a | NS       | NS   | 4.68E-02 | -1.5 |
| NM_008013    | <i>Fgl2</i>    | BXD48a | NS       | NS   | 5.85E-03 | 1.7  |
| NM_010218    | <i>Fjx1</i>    | BXD48a | 3.00E-02 | 1.3  | NS       | NS   |
| NM_001276408 | <i>Fn1</i>     | BXD48a | NS       | NS   | 4.79E-02 | 1.6  |
| NM_173753    | <i>Fnip1</i>   | BXD48a | 8.17E-03 | 1.5  | NS       | NS   |
| NM_001159706 | <i>Folh1</i>   | BXD48a | 4.55E-02 | 1.9  | 1.31E-02 | 2.0  |
| NM_010234    | <i>Fos</i>     | BXD48a | 4.10E-03 | 2.2  | 6.54E-04 | 2.4  |
| NM_008036    | <i>Fosb</i>    | BXD48a | 3.73E-03 | 2.5  | 1.06E-02 | 2.3  |
| NM_019740    | <i>Foxo3</i>   | BXD48a | 2.40E-02 | 1.6  | NS       | NS   |
| NM_010236    | <i>Fpgs</i>    | BXD48a | 1.32E-02 | -1.6 | NS       | NS   |
| NM_001081151 | <i>Gan</i>     | BXD48a | 3.41E-02 | 1.7  | NS       | NS   |
| NM_028022    | <i>Gatsl3</i>  | BXD48a | 3.00E-02 | 2.0  | NS       | NS   |
| NM_001252067 | <i>Gga3</i>    | BXD48a | 1.37E-02 | -1.4 | NS       | NS   |
| NM_010288    | <i>Gja1</i>    | BXD48a | NS       | NS   | 4.47E-03 | 1.5  |
| NM_029102    | <i>Glt8d2</i>  | BXD48a | NS       | NS   | 3.13E-02 | 2.0  |
| ENSMUST0000  |                |        |          |      |          | NS   |
| 0073126      | <i>Gm11555</i> | BXD48a | 1.82E-02 | -1.8 | NS       |      |
| ENSMUST0000  |                |        |          |      |          | NS   |
| 0179595      | <i>Gm21721</i> | BXD48a | 2.96E-02 | 1.9  | NS       |      |
| ENSMUST0000  |                |        |          |      |          | NS   |
| 0179217      | <i>Gm2310</i>  | BXD48a | 4.50E-02 | -2.0 | NS       |      |
| NM_001035122 | <i>Golm1</i>   | BXD48a | 2.96E-02 | 1.5  | NS       | NS   |
| NM_008149    | <i>Gpam</i>    | BXD48a | 1.31E-02 | 1.4  | 1.50E-02 | 1.4  |
| NM_001110809 | <i>Gpatch4</i> | BXD48a | 3.33E-03 | -1.7 | 1.06E-02 | -1.7 |
| NM_001145820 | <i>Gpd2</i>    | BXD48a | 2.46E-02 | -1.5 | NS       | NS   |
| NM_027518    | <i>Gpr137c</i> | BXD48a | 6.89E-07 | 2.0  | 3.87E-05 | 1.8  |
| NM_010338    | <i>Gpr37</i>   | BXD48a | 4.25E-04 | 1.9  | NS       | NS   |
| NM_145066    | <i>Gpr85</i>   | BXD48a | 4.99E-03 | 1.6  | NS       | NS   |
| NM_001177874 | <i>Gps1</i>    | BXD48a | NS       | NS   | 3.93E-02 | -1.3 |
| NM_153419    | <i>Grwd1</i>   | BXD48a | NS       | NS   | 5.05E-03 | -2.0 |
| NM_029938    | <i>H2afv</i>   | BXD48a | 3.77E-02 | 1.6  | NS       | NS   |



|              |                 |        |          |      |          |      |
|--------------|-----------------|--------|----------|------|----------|------|
| NM_027382    | <i>Hdac8</i>    | BXD48a | NS       | NS   | 3.55E-02 | 1.5  |
| NM_144835    | <i>Heatr1</i>   | BXD48a | 1.24E-02 | -1.7 | 3.51E-02 | -1.6 |
| NM_175256    | <i>Heg1</i>     | BXD48a | 6.03E-03 | 1.7  | NS       | NS   |
| NM_025812    | <i>Hmg20a</i>   | BXD48a | 2.74E-02 | 1.4  | NS       | NS   |
| NM_008255    | <i>Hmgcr</i>    | BXD48a | 7.80E-03 | -1.5 | 6.54E-04 | -1.7 |
| NM_008256    | <i>Hmgcs2</i>   | BXD48a | 1.32E-02 | 2.2  | 4.71E-05 | 3.0  |
| NM_001177705 | <i>Homez</i>    | BXD48a | NS       | NS   | 7.18E-03 | -1.9 |
| NM_010460    | <i>Hoxb7</i>    | BXD48a | NS       | NS   | 1.63E-02 | 1.8  |
| NM_053262    | <i>Hsd17b11</i> | BXD48a | NS       | NS   | 6.37E-03 | 1.6  |
| NM_010476    | <i>Hsd17b7</i>  | BXD48a | 5.68E-04 | -1.7 | 3.99E-06 | -1.9 |
| NM_028306    | <i>Hspa12b</i>  | BXD48a | 4.17E-02 | 1.7  | NS       | NS   |
| NM_019564    | <i>Htra1</i>    | BXD48a | 1.24E-02 | 1.7  | 1.39E-04 | 2.0  |
| NM_010495    | <i>Id1</i>      | BXD48a | 4.16E-03 | 2.0  | NS       | NS   |
| NM_145360    | <i>Idi1</i>     | BXD48a | 4.12E-07 | -2.1 | 3.02E-06 | -2.0 |
| NM_013562    | <i>Ifrd1</i>    | BXD48a | NS       | NS   | 7.83E-03 | -1.7 |
| NM_008360    | <i>Il18</i>     | BXD48a | NS       | NS   | 4.22E-02 | 1.3  |
| NM_010556    | <i>Il3</i>      | BXD48a | 3.95E-02 | 1.8  | NS       | NS   |
| NM_172439    | <i>Inpp5j</i>   | BXD48a | 2.42E-02 | 1.7  | NS       | NS   |
| NM_153526    | <i>Insig1</i>   | BXD48a | 5.09E-05 | -2.1 | 2.46E-05 | -2.1 |
| NM_010591    | <i>Jun</i>      | BXD48a | 2.53E-11 | 3.0  | 5.95E-10 | 2.8  |
| NM_001286944 | <i>Jund</i>     | BXD48a | 4.12E-07 | 2.1  | 6.98E-03 | 1.6  |
| NM_001289437 | <i>Kansl2</i>   | BXD48a | NS       | NS   | 1.05E-02 | -1.4 |
| NM_001081134 | <i>Kcng1</i>    | BXD48a | NS       | NS   | 1.56E-02 | -1.8 |
| NM_029911    | <i>Kcnk10</i>   | BXD48a | 2.81E-02 | 1.5  | NS       | NS   |
| NM_026135    | <i>Kctd16</i>   | BXD48a | NS       | NS   | 4.69E-03 | 1.8  |
| NM_078477    | <i>Klf16</i>    | BXD48a | 1.39E-03 | -1.8 | 1.59E-03 | -1.7 |
| NM_011803    | <i>Klf6</i>     | BXD48a | NS       | NS   | 1.01E-02 | -1.6 |
| NM_001252658 | <i>Ldlr</i>     | BXD48a | 2.34E-03 | -2.1 | 3.80E-05 | -2.5 |
| NM_008494    | <i>Lfng</i>     | BXD48a | 1.61E-03 | 1.6  | NS       | NS   |
| NM_181074    | <i>Lingo1</i>   | BXD48a | 3.77E-02 | -1.3 | NS       | NS   |
| NM_201529    | <i>Lmo7</i>     | BXD48a | 2.67E-02 | 1.4  | 3.35E-02 | 1.4  |
| NM_207206    | <i>Lpcat4</i>   | BXD48a | 4.33E-02 | -1.6 | NS       | NS   |
| NM_008377    | <i>Lrig1</i>    | BXD48a | NS       | NS   | 4.85E-02 | -1.5 |
| NM_001146048 | <i>Lrrc1</i>    | BXD48a | 1.33E-02 | 1.9  | NS       | NS   |
| NM_001143755 | <i>Lrrc27</i>   | BXD48a | 2.99E-02 | 1.5  | NS       | NS   |
| NM_133807    | <i>Lrrc59</i>   | BXD48a | 3.41E-02 | -1.4 | 3.35E-02 | -1.4 |
| NM_021500    | <i>Maea</i>     | BXD48a | NS       | NS   | 3.29E-02 | -1.4 |
| NM_023788    | <i>Mageh1</i>   | BXD48a | NS       | NS   | 2.47E-02 | -1.4 |

|              |                 |        |          |      |          |      |
|--------------|-----------------|--------|----------|------|----------|------|
| NM_001145802 | <i>Mak</i>      | BXD48a | 3.89E-02 | -1.8 | NS       | NS   |
| NM_011841    | <i>Mapk7</i>    | BXD48a | 8.47E-03 | -1.4 | 3.93E-02 | -1.4 |
| NM_028372    | <i>Mblac2</i>   | BXD48a | NS       | NS   | 4.03E-02 | -1.5 |
| NM_001012335 | <i>Mdk</i>      | BXD48a | NS       | NS   | 3.51E-02 | 1.8  |
| NM_026896    | <i>Med27</i>    | BXD48a | NS       | NS   | 7.83E-04 | -1.6 |
| NM_001001979 | <i>Megf10</i>   | BXD48a | NS       | NS   | 4.01E-02 | 1.5  |
| NM_008587    | <i>Mertk</i>    | BXD48a | NS       | NS   | 4.52E-02 | 1.9  |
| NM_023799    | <i>Mgea5</i>    | BXD48a | 3.77E-02 | 1.3  | 3.56E-05 | 1.5  |
| NM_001243584 | <i>Mif4gd</i>   | BXD48a | NS       | NS   | 4.80E-02 | 1.6  |
| NM_172457    | <i>Mob3a</i>    | BXD48a | NS       | NS   | 4.07E-02 | -1.5 |
| NM_023773    | <i>Mphosph8</i> | BXD48a | 4.42E-02 | -1.4 | 2.27E-02 | -1.5 |
| NM_001101482 | <i>Mrap2</i>    | BXD48a | 5.31E-03 | 1.9  | NS       | NS   |
| NM_025436    | <i>Msmo1</i>    | BXD48a | 5.09E-05 | -2.1 | 4.71E-05 | -2.1 |
| NM_013602    | <i>Mt1</i>      | BXD48a | 1.24E-02 | 1.5  | 9.46E-04 | 1.7  |
| NM_008630    | <i>Mt2</i>      | BXD48a | 6.94E-05 | 2.4  | 3.99E-06 | 2.7  |
| NM_008638    | <i>Mthfd2</i>   | BXD48a | NS       | NS   | 2.63E-03 | -1.9 |
| NM_001005863 | <i>Mtus1</i>    | BXD48a | NS       | NS   | 1.86E-03 | 1.7  |
| NM_138656    | <i>Mvd</i>      | BXD48a | 3.34E-02 | -1.6 | 3.44E-04 | -2.0 |
| NM_001008542 | <i>Mxi1</i>     | BXD48a | 2.49E-06 | 1.7  | 3.63E-07 | 1.8  |
| NM_001040395 | <i>Nadk2</i>    | BXD48a | 1.20E-02 | 1.4  | NS       | NS   |
| NM_001114085 | <i>Nde1</i>     | BXD48a | NS       | NS   | 2.17E-02 | 1.6  |
| NM_022565    | <i>Ndst4</i>    | BXD48a | NS       | NS   | 4.88E-02 | 1.7  |
| NM_001111324 | <i>Nedd9</i>    | BXD48a | 2.03E-03 | 1.7  | NS       | NS   |
| NM_001048168 | <i>Nfyc</i>     | BXD48a | NS       | NS   | 4.03E-02 | -1.4 |
| NM_145469    | <i>Nipal2</i>   | BXD48a | NS       | NS   | 3.51E-02 | 1.5  |
| NM_021303    | <i>Noc2l</i>    | BXD48a | NS       | NS   | 1.86E-03 | -1.6 |
| NM_001008421 | <i>Nol10</i>    | BXD48a | NS       | NS   | 3.71E-02 | -1.6 |
| NM_138747    | <i>Nop2</i>     | BXD48a | 3.93E-03 | -1.5 | 3.80E-03 | -1.5 |
| NM_024193    | <i>Nop56</i>    | BXD48a | 1.30E-02 | -1.6 | NS       | NS   |
| NM_018868    | <i>Nop58</i>    | BXD48a | NS       | NS   | 2.72E-02 | -1.4 |
| NM_010342    | <i>Npbwr1</i>   | BXD48a | 3.86E-02 | 1.6  | NS       | NS   |
| NM_008723    | <i>Npm3</i>     | BXD48a | NS       | NS   | 3.72E-02 | -1.6 |
| NM_175678    | <i>Npsr1</i>    | BXD48a | 3.77E-02 | -2.4 | NS       | NS   |
| NM_021552    | <i>Nsa2</i>     | BXD48a | 4.42E-02 | 1.4  | NS       | NS   |
| NM_010941    | <i>Nsdhl</i>    | BXD48a | 1.20E-02 | -1.4 | NS       | NS   |
| NM_001164604 | <i>Nsmce2</i>   | BXD48a | 4.84E-02 | 1.4  | NS       | NS   |
| NM_008751    | <i>Nxph1</i>    | BXD48a | NS       | NS   | 1.06E-02 | -1.5 |
| NM_013614    | <i>Odc1</i>     | BXD48a | 2.08E-03 | 1.8  | NS       | NS   |

|              |                 |        |          |      |          |      |
|--------------|-----------------|--------|----------|------|----------|------|
| NM_146491    | <i>Olfr1410</i> | BXD48a | 1.61E-03 | -2.1 | NS       | NS   |
| NM_010970    | <i>Olfr23</i>   | BXD48a | 3.65E-02 | -1.9 | NS       | NS   |
| NM_001011858 | <i>Olfr504</i>  | BXD48a | 4.84E-02 | -2.0 | NS       | NS   |
| NM_147067    | <i>Olfr829</i>  | BXD48a | 7.80E-03 | -2.9 | NS       | NS   |
| NM_146557    | <i>Olfr869</i>  | BXD48a | NS       | NS   | 2.82E-02 | -2.5 |
| NM_001134791 | <i>Osbpl9</i>   | BXD48a | 1.03E-03 | 1.4  | 1.63E-02 | 1.3  |
| NM_001101479 | <i>Pabpc4l</i>  | BXD48a | NS       | NS   | 3.37E-02 | 1.8  |
| NM_146169    | <i>Paip2b</i>   | BXD48a | NS       | NS   | 4.15E-02 | 1.5  |
| NM_198410    | <i>Paqr6</i>    | BXD48a | NS       | NS   | 4.69E-03 | 1.8  |
| NM_183028    | <i>Pcmtd1</i>   | BXD48a | 3.77E-02 | 1.3  | NS       | NS   |
| NM_153594    | <i>Pcmtd2</i>   | BXD48a | 1.15E-04 | 2.0  | NS       | NS   |
| NM_008803    | <i>Pde8a</i>    | BXD48a | 2.07E-02 | 1.9  | 2.40E-02 | 1.8  |
| NM_008808    | <i>Pdgfa</i>    | BXD48a | NS       | NS   | 1.63E-02 | -1.5 |
| NM_001159367 | <i>Per1</i>     | BXD48a | 4.06E-02 | 1.5  | 2.40E-02 | 1.6  |
| NM_001109690 | <i>Phf21a</i>   | BXD48a | 3.94E-02 | 1.6  | NS       | NS   |
| NM_030064    | <i>Phf23</i>    | BXD48a | NS       | NS   | 1.32E-02 | -1.6 |
| NM_178149    | <i>Pik3ip1</i>  | BXD48a | 1.15E-04 | 2.2  | 9.40E-05 | 2.2  |
| NM_001024955 | <i>Pik3r1</i>   | BXD48a | 1.52E-06 | 1.6  | 7.15E-07 | 1.7  |
| NM_181585    | <i>Pik3r3</i>   | BXD48a | NS       | NS   | 2.91E-02 | 1.4  |
| NM_023371    | <i>Pin1</i>     | BXD48a | 5.15E-03 | -1.5 | NS       | NS   |
| NM_152813    | <i>Plcd3</i>    | BXD48a | 1.89E-03 | 1.9  | 4.50E-04 | 2.0  |
| NM_001033253 | <i>Plekhg1</i>  | BXD48a | 2.55E-06 | 2.2  | 6.54E-04 | 1.8  |
| NM_013807    | <i>Plk3</i>     | BXD48a | NS       | NS   | 1.39E-03 | -1.8 |
| NM_022995    | <i>Pmepa1</i>   | BXD48a | 2.39E-02 | 1.4  | NS       | NS   |
| NM_001033225 | <i>Pnrc1</i>    | BXD48a | NS       | NS   | 4.79E-02 | 1.3  |
| NM_177782    | <i>Prex1</i>    | BXD48a | 1.24E-02 | -1.5 | NS       | NS   |
| NM_011192    | <i>Psme3</i>    | BXD48a | 2.42E-02 | -1.3 | NS       | NS   |
| NM_212446    | <i>Psmf1</i>    | BXD48a | 1.20E-02 | 1.3  | NS       | NS   |
| NM_022415    | <i>Ptges</i>    | BXD48a | NS       | NS   | 2.14E-02 | 1.7  |
| NM_001163565 | <i>Ptpn5</i>    | BXD48a | NS       | NS   | 2.49E-02 | -1.3 |
| NM_025831    | <i>Pxdc1</i>    | BXD48a | 2.92E-03 | 1.7  | NS       | NS   |
| NM_029494    | <i>Rab30</i>    | BXD48a | 7.32E-07 | 2.0  | 3.55E-05 | 1.8  |
| NM_001038621 | <i>Rabgap1l</i> | BXD48a | 1.22E-03 | 1.4  | 3.32E-02 | 1.3  |
| NM_001099624 | <i>Rapgef2</i>  | BXD48a | 3.70E-06 | 1.6  | 9.55E-05 | 1.5  |
| NM_001252494 | <i>Rapgef6</i>  | BXD48a | 5.09E-05 | 1.9  | 1.52E-05 | 2.0  |
| NM_001081549 | <i>Rcan1</i>    | BXD48a | 4.53E-02 | 1.4  | NS       | NS   |
| NM_009062    | <i>Rgs4</i>     | BXD48a | 4.47E-02 | 1.5  | 3.38E-03 | 1.7  |
| NM_153514    | <i>Rhobtb2</i>  | BXD48a | NS       | NS   | 2.58E-03 | -1.6 |

|              |                 |        |          |      |          |      |
|--------------|-----------------|--------|----------|------|----------|------|
| NM_172612    | <i>Rnd1</i>     | BXD48a | 2.81E-02 | -1.6 | NS       | NS   |
| NM_001166553 | <i>Rnf145</i>   | BXD48a | 1.43E-03 | -1.5 | 6.78E-07 | -1.8 |
| NM_146244    | <i>Rps6kl1</i>  | BXD48a | 2.14E-03 | 1.8  | NS       | NS   |
| NM_145620    | <i>Rrp9</i>     | BXD48a | 2.57E-03 | -1.9 | NS       | NS   |
| NM_013650    | <i>S100a8</i>   | BXD48a | NS       | NS   | 7.85E-03 | 2.5  |
| NM_001244916 | <i>Sall2</i>    | BXD48a | NS       | NS   | 2.52E-04 | -1.8 |
| NM_172604    | <i>Scara3</i>   | BXD48a | 3.10E-02 | 1.5  | 5.85E-03 | 1.6  |
| NM_009129    | <i>Scg2</i>     | BXD48a | 1.24E-02 | 1.3  | 8.84E-03 | 1.4  |
| NM_011521    | <i>Sdc4</i>     | BXD48a | 1.57E-04 | 2.5  | 2.25E-04 | 2.5  |
| NM_001013370 | <i>Sesn1</i>    | BXD48a | 3.83E-02 | 1.5  | 6.53E-04 | 1.7  |
| NM_030261    | <i>Sesn3</i>    | BXD48a | NS       | NS   | 4.30E-03 | 1.5  |
| NM_016687    | <i>Sfrp4</i>    | BXD48a | NS       | NS   | 9.46E-04 | 2.5  |
| NM_029339    | <i>Sgf29</i>    | BXD48a | NS       | NS   | 4.12E-02 | -1.4 |
| NM_001162965 | <i>Sgsm1</i>    | BXD48a | 1.82E-02 | -1.5 | NS       | NS   |
| NM_009167    | <i>Shc3</i>     | BXD48a | 1.95E-02 | -1.3 | 1.10E-02 | -1.4 |
| NM_001286538 | <i>Sigmar1</i>  | BXD48a | 2.39E-02 | -1.4 | NS       | NS   |
| NM_027921    | <i>Slc16a14</i> | BXD48a | 3.08E-03 | 1.6  | NS       | NS   |
| NM_001029842 | <i>Slc16a6</i>  | BXD48a | NS       | NS   | 1.12E-02 | 2.1  |
| NM_025807    | <i>Slc16a9</i>  | BXD48a | NS       | NS   | 2.27E-02 | 2.9  |
| NM_001159593 | <i>Slc20a1</i>  | BXD48a | 6.94E-05 | -1.6 | NS       | NS   |
| NM_198650    | <i>Slc22a20</i> | BXD48a | 4.55E-02 | -1.6 | NS       | NS   |
| ENSMUST0000  |                 |        |          |      |          | 1.8  |
| 0114764      | <i>Slc26a8</i>  | BXD48a | NS       | NS   | 4.25E-02 |      |
| NM_007854    | <i>Slc29a2</i>  | BXD48a | 2.46E-02 | -1.7 | NS       | NS   |
| NM_011400    | <i>Slc2a1</i>   | BXD48a | 7.50E-05 | 2.1  | 5.10E-03 | 1.8  |
| NM_175121    | <i>Slc38a2</i>  | BXD48a | NS       | NS   | 1.88E-02 | 1.4  |
| NM_001012305 | <i>Slc39a12</i> | BXD48a | NS       | NS   | 7.80E-03 | 1.7  |
| NM_001199283 | <i>Slc43a2</i>  | BXD48a | 2.81E-02 | 1.5  | NS       | NS   |
| NM_001081263 | <i>Slc44a5</i>  | BXD48a | 2.55E-06 | 1.9  | 1.43E-04 | 1.7  |
| NM_029643    | <i>Slc52a2</i>  | BXD48a | NS       | NS   | 2.98E-03 | -1.7 |
| NM_001038643 | <i>Slco3a1</i>  | BXD48a | NS       | NS   | 6.17E-03 | -1.5 |
| NM_008539    | <i>Smad1</i>    | BXD48a | NS       | NS   | 4.25E-02 | 1.3  |
| NM_001177833 | <i>Smox</i>     | BXD48a | NS       | NS   | 4.15E-02 | 1.5  |
| NM_146126    | <i>Sord</i>     | BXD48a | 1.62E-02 | 1.7  | NS       | NS   |
| NM_001025428 | <i>Spag9</i>    | BXD48a | 3.41E-02 | 1.3  | 3.35E-02 | 1.3  |
| NM_182927    | <i>Spred3</i>   | BXD48a | 2.75E-02 | -1.8 | 1.08E-03 | -2.2 |
| NM_011898    | <i>Spry4</i>    | BXD48a | NS       | NS   | 6.42E-03 | -1.8 |
| NM_009270    | <i>Sqle</i>     | BXD48a | 1.61E-03 | -1.6 | 1.08E-02 | -1.5 |

|              |                |        |          |      |          |      |
|--------------|----------------|--------|----------|------|----------|------|
| NM_001081037 | <i>Srgap1</i>  | BXD48a | 3.48E-02 | -1.5 | NS       | NS   |
| NM_009272    | <i>Srm</i>     | BXD48a | 4.17E-02 | -1.4 | 4.80E-02 | -1.4 |
| NM_016795    | <i>Srpk1</i>   | BXD48a | 1.20E-02 | -1.5 | 2.59E-02 | -1.5 |
| NM_011358    | <i>Srsf2</i>   | BXD48a | 2.46E-02 | -1.4 | 2.52E-04 | -1.6 |
| NM_001195485 | <i>Srsf7</i>   | BXD48a | NS       | NS   | 3.29E-04 | -1.9 |
| NM_009218    | <i>Sstr3</i>   | BXD48a | NS       | NS   | 8.03E-03 | -1.9 |
| NM_011374    | <i>St8sia1</i> | BXD48a | 2.64E-02 | 1.4  | 7.21E-03 | 1.5  |
| NM_133774    | <i>Stard4</i>  | BXD48a | 3.00E-02 | -1.6 | 1.44E-02 | -1.7 |
| NM_153563    | <i>Strip1</i>  | BXD48a | 4.74E-03 | -1.4 | 1.33E-03 | -1.4 |
| NM_019995    | <i>Supt20</i>  | BXD48a | NS       | NS   | 4.69E-03 | -1.7 |
| NM_013678    | <i>Surf2</i>   | BXD48a | NS       | NS   | 4.69E-03 | -1.4 |
| NM_001040085 | <i>Sytl2</i>   | BXD48a | NS       | NS   | 1.33E-02 | 1.8  |
| NM_001289603 | <i>Tfcp2</i>   | BXD48a | NS       | NS   | 4.69E-03 | -1.6 |
| NM_009368    | <i>Tgfb3</i>   | BXD48a | NS       | NS   | 2.53E-02 | 2.1  |
| NM_011580    | <i>Thbs1</i>   | BXD48a | 4.17E-02 | 2.0  | NS       | NS   |
| NM_174989    | <i>Ticam1</i>  | BXD48a | 1.24E-02 | 2.0  | NS       | NS   |
| NM_001081145 | <i>Tigd2</i>   | BXD48a | 4.92E-02 | 1.4  | NS       | NS   |
| NM_026708    | <i>Tlcd1</i>   | BXD48a | NS       | NS   | 1.63E-02 | -1.5 |
| NM_133211    | <i>Tlr7</i>    | BXD48a | 1.30E-02 | 2.0  | 4.64E-02 | 1.9  |
| NM_031178    | <i>Tlr9</i>    | BXD48a | 1.29E-02 | 2.1  | NS       | NS   |
| NM_177344    | <i>Tmem203</i> | BXD48a | 2.74E-02 | -1.7 | NS       | NS   |
| NM_001048267 | <i>Tnpo1</i>   | BXD48a | 1.52E-03 | 1.5  | 9.13E-03 | 1.4  |
| NM_001109748 | <i>Tomm40</i>  | BXD48a | NS       | NS   | 3.35E-02 | -1.4 |
| NM_001164792 | <i>Tpbg</i>    | BXD48a | 1.20E-02 | 2.0  | NS       | NS   |
| NM_001099792 | <i>Trmt61a</i> | BXD48a | NS       | NS   | 2.63E-03 | -1.8 |
| NM_032000    | <i>Trps1</i>   | BXD48a | NS       | NS   | 3.51E-02 | 1.5  |
| NM_001177751 | <i>Tsc22d1</i> | BXD48a | 4.19E-02 | 1.2  | NS       | NS   |
| NM_197996    | <i>Tspan15</i> | BXD48a | NS       | NS   | 2.65E-02 | 1.6  |
| NM_146116    | <i>Tubb4b</i>  | BXD48a | NS       | NS   | 2.80E-02 | -1.4 |
| NM_001009935 | <i>Txnip</i>   | BXD48a | 2.55E-06 | 3.8  | 1.99E-07 | 4.6  |
| NM_001169576 | <i>Ube2h</i>   | BXD48a | 1.29E-02 | 1.4  | 6.17E-03 | 1.5  |
| NM_001145162 | <i>Ube2ql1</i> | BXD48a | NS       | NS   | 3.51E-02 | -1.3 |
| NM_030724    | <i>Uck2</i>    | BXD48a | NS       | NS   | 1.63E-02 | -1.4 |
| ENSMUST0000  |                |        |          |      |          | -1.7 |
| 0053686      | <i>Uck2</i>    | BXD48a | NS       | NS   | 2.99E-02 |      |
| NM_009462    | <i>Usp10</i>   | BXD48a | NS       | NS   | 7.78E-03 | -1.4 |
| NM_183225    | <i>Usp24</i>   | BXD48a | 4.84E-02 | -1.4 | NS       | NS   |
| NM_001081249 | <i>Vcan</i>    | BXD48a | NS       | NS   | 2.05E-02 | -1.5 |

|              |                      |        |          |      |          |      |
|--------------|----------------------|--------|----------|------|----------|------|
| NM_001166737 | <i>Vmn1r103</i>      | BXD48a | 2.77E-02 | -1.8 | NS       | NS   |
| NM_001105179 | <i>Vmn2r51</i>       | BXD48a | 4.17E-02 | -2.1 | NS       | NS   |
| NM_022997    | <i>Vps35</i>         | BXD48a | NS       | NS   | 2.67E-02 | -1.3 |
| NM_145967    | <i>Vstm2a</i>        | BXD48a | 2.12E-03 | -1.4 | 9.46E-04 | -1.4 |
| NM_054068    | <i>Vsx1</i>          | BXD48a | NS       | NS   | 3.65E-02 | -1.6 |
| NM_172372    | <i>Wdr45</i>         | BXD48a | 2.74E-02 | 1.7  | NS       | NS   |
| NM_134139    | <i>Wdr74</i>         | BXD48a | 3.00E-02 | -1.4 | NS       | NS   |
| NM_145940    | <i>Wipi1</i>         | BXD48a | NS       | NS   | 4.80E-02 | 1.4  |
| NM_001005342 | <i>Ypel4</i>         | BXD48a | 3.41E-02 | 1.9  | 4.25E-02 | 1.9  |
| NM_027166    | <i>Ypel5</i>         | BXD48a | 1.28E-04 | 1.6  | 1.49E-04 | 1.6  |
| NM_028106    | <i>Zbed3</i>         | BXD48a | 2.65E-03 | 1.6  | 1.44E-02 | 1.5  |
| NM_001115130 | <i>Zbtb44</i>        | BXD48a | NS       | NS   | 4.85E-02 | 1.4  |
| NM_001082485 | <i>Zfp266</i>        | BXD48a | 3.00E-02 | 1.4  | NS       | NS   |
| NM_001110309 | <i>Zfp426</i>        | BXD48a | 2.01E-02 | 1.5  | NS       | NS   |
| NM_145622    | <i>Zfp65</i>         | BXD48a | NS       | NS   | 3.58E-02 | 1.5  |
| NM_001113486 | <i>-44448</i>        | BXD100 | NS       | NS   | 6.87E-03 | -1.3 |
| NM_001033262 | <i>-44264</i>        | BXD100 | NS       | NS   | 2.48E-03 | -1.8 |
| NM_001166372 | <i>-44256</i>        | BXD100 | 4.02E-02 | 1.4  | 3.02E-02 | 1.4  |
| NM_021446    | <i>0610007P14Rik</i> | BXD100 | 3.82E-03 | -1.4 | 3.27E-03 | -1.4 |
| NM_001145895 | <i>1700019G17Rik</i> | BXD100 | 3.40E-02 | 1.6  | NS       | NS   |
| NR_045177    | <i>2900055J20Rik</i> | BXD100 | 4.69E-03 | 1.7  | 7.87E-07 | 2.2  |
| NM_001081963 | <i>9430020K01Rik</i> | BXD100 | NS       | NS   | 1.43E-02 | 1.7  |
| NM_001167925 | <i>A730017C20Rik</i> | BXD100 | 2.62E-02 | 1.2  | 7.66E-03 | 1.2  |
| NR_015488    | <i>A930003A15Rik</i> | BXD100 | NS       | NS   | 3.62E-03 | 2.1  |
| NR_033609    | <i>A930017M01Rik</i> | BXD100 | 2.61E-03 | 1.8  | NS       | NS   |
| NM_030210    | <i>Aacs</i>          | BXD100 | 7.38E-03 | -1.5 | 9.63E-03 | -1.5 |
| NM_001166556 | <i>Abca6</i>         | BXD100 | 4.74E-02 | 1.9  | NS       | NS   |
| NM_013851    | <i>Abca8b</i>        | BXD100 | 2.36E-04 | 2.3  | 2.01E-02 | 1.8  |
| NM_011075    | <i>Abcb1b</i>        | BXD100 | NS       | NS   | 1.79E-04 | 2.3  |
| NM_001190443 | <i>Abcf2</i>         | BXD100 | NS       | NS   | 4.08E-02 | -1.3 |
| NM_025826    | <i>Acadsb</i>        | BXD100 | 1.54E-02 | 1.6  | NS       | NS   |
| NM_009338    | <i>Acat2</i>         | BXD100 | NS       | NS   | 1.58E-02 | -1.4 |
| NM_153151    | <i>Acat3</i>         | BXD100 | NS       | NS   | 2.66E-02 | -1.4 |
| NM_001199296 | <i>Acly</i>          | BXD100 | NS       | NS   | 4.11E-03 | -1.4 |
| NM_001205385 | <i>Actr3</i>         | BXD100 | 1.20E-02 | -1.2 | NS       | NS   |
| NM_001270996 | <i>Adam9</i>         | BXD100 | 1.67E-02 | 1.4  | NS       | NS   |
| NM_001038587 | <i>Adar</i>          | BXD100 | NS       | NS   | 2.66E-02 | 1.4  |
| NM_001024837 | <i>Adarb1</i>        | BXD100 | 4.80E-02 | -1.4 | NS       | NS   |

|              |                 |        |          |      |          |      |
|--------------|-----------------|--------|----------|------|----------|------|
| NM_001163029 | <i>Adgre5</i>   | BXD100 | 2.21E-02 | 1.7  | NS       | NS   |
| NM_133222    | <i>Adgrl4</i>   | BXD100 | 2.44E-02 | 1.4  | 5.32E-03 | 1.5  |
| NM_001080798 | <i>Aff1</i>     | BXD100 | 6.91E-03 | 1.8  | 2.01E-02 | 1.7  |
| NM_178162    | <i>Agfg2</i>    | BXD100 | 2.07E-04 | -2.1 | 1.08E-03 | -2.0 |
| NM_026644    | <i>Agpat4</i>   | BXD100 | 9.46E-04 | 1.5  | NS       | NS   |
| NM_007428    | <i>Agt</i>      | BXD100 | 1.34E-02 | 3.1  | NS       | NS   |
| NM_009642    | <i>Agtrap</i>   | BXD100 | 1.34E-02 | 1.7  | NS       | NS   |
| NM_001172146 | <i>Aimp2</i>    | BXD100 | 1.59E-02 | -1.7 | 3.09E-02 | -1.6 |
| NM_198111    | <i>Akap6</i>    | BXD100 | NS       | NS   | 4.95E-02 | 1.2  |
| NM_017476    | <i>Akap8l</i>   | BXD100 | 7.23E-03 | 1.4  | 7.40E-03 | 1.4  |
| NM_009658    | <i>Akr1b3</i>   | BXD100 | 3.29E-02 | -1.4 | NS       | NS   |
| NM_134066    | <i>Akr1c18</i>  | BXD100 | 9.90E-03 | -1.9 | NS       | NS   |
| ENSMUST0000  |                 |        |          |      |          | -1.5 |
| 0080898      | <i>Amd2</i>     | BXD100 | NS       | NS   | 4.84E-02 |      |
| NM_019764    | <i>Amotl2</i>   | BXD100 | NS       | NS   | 4.68E-02 | 1.6  |
| NM_007426    | <i>Angpt2</i>   | BXD100 | NS       | NS   | 3.09E-02 | 1.8  |
| NM_020581    | <i>Angptl4</i>  | BXD100 | 7.08E-04 | 2.2  | 1.08E-03 | 2.2  |
| NM_001024851 | <i>Ankrd34a</i> | BXD100 | 2.82E-02 | -1.8 | 1.63E-02 | -1.8 |
| NM_001081433 | <i>Ankrd44</i>  | BXD100 | 4.99E-02 | 1.5  | NS       | NS   |
| NM_028390    | <i>Anln</i>     | BXD100 | 2.53E-02 | 2.0  | NS       | NS   |
| NM_001277188 | <i>Ano4</i>     | BXD100 | NS       | NS   | 2.70E-02 | 1.5  |
| NM_001253813 | <i>Ano6</i>     | BXD100 | 4.10E-03 | 1.5  | 1.82E-02 | 1.4  |
| NM_026674    | <i>Aph1c</i>    | BXD100 | 1.17E-02 | 1.5  | NS       | NS   |
| NM_001109914 | <i>Apold1</i>   | BXD100 | 1.79E-02 | 1.8  | NS       | NS   |
| NM_007481    | <i>Arf6</i>     | BXD100 | NS       | NS   | 1.99E-02 | -1.3 |
| NM_009705    | <i>Arg2</i>     | BXD100 | 4.66E-02 | 1.7  | NS       | NS   |
| NM_001172205 | <i>Arid5a</i>   | BXD100 | 8.07E-06 | 2.8  | 7.23E-05 | 2.6  |
| NM_023598    | <i>Arid5b</i>   | BXD100 | 1.15E-07 | 2.1  | 3.01E-04 | 1.7  |
| NM_001042591 | <i>Arrdc3</i>   | BXD100 | 1.34E-10 | 3.3  | 4.09E-06 | 2.4  |
| NM_001042592 | <i>Arrdc4</i>   | BXD100 | 7.08E-04 | 1.9  | NS       | NS   |
| NM_007492    | <i>Arx</i>      | BXD100 | NS       | NS   | 3.33E-03 | -1.9 |
| NM_019652    | <i>Asna1</i>    | BXD100 | NS       | NS   | 3.50E-02 | -1.3 |
| NM_179203    | <i>Atad3a</i>   | BXD100 | NS       | NS   | 5.20E-03 | -1.5 |
| NM_001287180 | <i>Atf4</i>     | BXD100 | 3.51E-02 | -1.4 | NS       | NS   |
| NM_019426    | <i>Atf7ip</i>   | BXD100 | NS       | NS   | 6.60E-03 | 1.5  |
| NM_026217    | <i>Atg12</i>    | BXD100 | 2.56E-04 | 1.4  | 1.22E-02 | 1.3  |
| NM_001199304 | <i>Atxn1</i>    | BXD100 | NS       | NS   | 2.04E-02 | 1.4  |
| NM_030235    | <i>Avl9</i>     | BXD100 | 3.41E-02 | 1.3  | NS       | NS   |

|              |                 |        |          |      |          |      |
|--------------|-----------------|--------|----------|------|----------|------|
| NM_016847    | <i>Avpr1a</i>   | BXD100 | 3.96E-05 | -2.3 | 1.60E-06 | -2.6 |
| NM_020025    | <i>B3galt2</i>  | BXD100 | 2.21E-02 | 1.5  | 3.47E-02 | 1.5  |
| NM_001122993 | <i>B3galt5</i>  | BXD100 | 1.30E-02 | 1.6  | 4.07E-02 | 1.5  |
| NM_001159407 | <i>B3gnt5</i>   | BXD100 | 3.47E-04 | 1.9  | 3.04E-03 | 1.7  |
| NM_019835    | <i>B4galt5</i>  | BXD100 | 1.01E-02 | -1.5 | 1.67E-03 | -1.6 |
| NM_001001182 | <i>Baz2b</i>    | BXD100 | 3.32E-02 | 1.4  | 1.44E-02 | 1.5  |
| NM_175325    | <i>Bbs4</i>     | BXD100 | 9.62E-04 | 1.4  | 6.19E-04 | 1.4  |
| NM_178415    | <i>Bbs9</i>     | BXD100 | 3.95E-02 | 1.5  | NS       | NS   |
| NM_027444    | <i>Bbx</i>      | BXD100 | 4.02E-02 | 1.6  | NS       | NS   |
| NM_001284410 | <i>Bcl2l11</i>  | BXD100 | 6.04E-07 | 2.9  | 2.11E-07 | 3.1  |
| NM_001122683 | <i>Bdh1</i>     | BXD100 | 3.55E-03 | -1.4 | 3.61E-04 | -1.5 |
| NM_173404    | <i>Bmp3</i>     | BXD100 | 2.50E-02 | -1.7 | 6.60E-03 | -1.8 |
| NM_001277216 | <i>Bmpr1b</i>   | BXD100 | 3.88E-02 | 1.6  | NS       | NS   |
| NM_001136064 | <i>Bscl2</i>    | BXD100 | 2.49E-02 | 1.4  | NS       | NS   |
| NM_133889    | <i>Bsdc1</i>    | BXD100 | 2.27E-05 | 1.5  | 3.33E-03 | 1.4  |
| NM_007570    | <i>Btg2</i>     | BXD100 | 6.36E-03 | 1.7  | 8.59E-03 | 1.7  |
| NM_009770    | <i>Btg3</i>     | BXD100 | 2.32E-06 | 2.4  | 6.73E-03 | 1.8  |
| NM_016859    | <i>Bysl</i>     | BXD100 | 6.02E-03 | -1.7 | 1.04E-02 | -1.7 |
| NM_007573    | <i>C1qbp</i>    | BXD100 | 3.07E-02 | -1.3 | NS       | NS   |
| NM_001135172 | <i>C1qtnf7</i>  | BXD100 | 1.28E-02 | 1.8  | NS       | NS   |
| NM_001146287 | <i>Cables1</i>  | BXD100 | NS       | NS   | 3.08E-03 | 2.0  |
| NM_001159533 | <i>Cacna1c</i>  | BXD100 | NS       | NS   | 3.44E-02 | 1.4  |
| NM_026192    | <i>Calcoco1</i> | BXD100 | NS       | NS   | 3.60E-02 | 1.4  |
| NM_144817    | <i>Camk1g</i>   | BXD100 | NS       | NS   | 8.57E-03 | -1.5 |
| NM_025821    | <i>Carhsp1</i>  | BXD100 | 7.23E-03 | 1.8  | NS       | NS   |
| NM_007625    | <i>Cbx4</i>     | BXD100 | NS       | NS   | 3.09E-02 | -1.4 |
| NM_001081429 | <i>Ccdc15</i>   | BXD100 | NS       | NS   | 4.69E-02 | 1.6  |
| NM_177716    | <i>Ccdc184</i>  | BXD100 | 3.55E-03 | -1.6 | 2.22E-02 | -1.5 |
| NM_144820    | <i>Ccdc28a</i>  | BXD100 | NS       | NS   | 3.13E-03 | 2.0  |
| NM_011337    | <i>Ccl3</i>     | BXD100 | 1.52E-03 | 2.7  | NS       | NS   |
| NM_007631    | <i>Ccnd1</i>    | BXD100 | 2.47E-02 | -1.5 | NS       | NS   |
| NM_009831    | <i>Ccng1</i>    | BXD100 | NS       | NS   | 3.49E-02 | 1.3  |
| NM_007635    | <i>Ccng2</i>    | BXD100 | NS       | NS   | 3.32E-02 | 1.4  |
| NM_001114328 | <i>Ccp1</i>     | BXD100 | NS       | NS   | 2.95E-02 | 1.4  |
| NM_009837    | <i>Cct4</i>     | BXD100 | NS       | NS   | 3.02E-02 | -1.3 |
| NM_001170395 | <i>Cd163</i>    | BXD100 | 2.45E-02 | 2.3  | NS       | NS   |
| NM_007646    | <i>Cd38</i>     | BXD100 | NS       | NS   | 2.37E-02 | 2.0  |
| NM_009866    | <i>Cdh11</i>    | BXD100 | 1.84E-02 | -1.5 | NS       | NS   |



|              |                 |        |          |      |          |      |
|--------------|-----------------|--------|----------|------|----------|------|
| NM_009875    | <i>Cdkn1b</i>   | BXD100 | 2.29E-02 | 1.4  | NS       | NS   |
| NM_172447    | <i>Cfap69</i>   | BXD100 | 1.01E-02 | 2.1  | NS       | NS   |
| NM_001081345 | <i>Chd2</i>     | BXD100 | 3.55E-03 | 1.5  | 1.99E-02 | 1.4  |
| NM_001163640 | <i>Chn2</i>     | BXD100 | 3.75E-02 | 1.4  | NS       | NS   |
| NM_025854    | <i>Cir1</i>     | BXD100 | 2.23E-02 | 1.4  | NS       | NS   |
| NM_001177770 | <i>Clcc1</i>    | BXD100 | NS       | NS   | 2.01E-02 | 1.7  |
| NM_001243762 | <i>Clcn5</i>    | BXD100 | 1.01E-02 | 1.6  | 1.67E-03 | 1.8  |
| NM_153384    | <i>Clrn1</i>    | BXD100 | 3.32E-03 | 1.9  | 8.21E-03 | 1.8  |
| NM_024217    | <i>Cmtm3</i>    | BXD100 | 2.29E-02 | 1.4  | NS       | NS   |
| NM_009932    | <i>Col4a2</i>   | BXD100 | NS       | NS   | 2.04E-02 | 1.6  |
| NM_009898    | <i>Coro1a</i>   | BXD100 | 9.74E-03 | -1.7 | 1.16E-02 | -1.7 |
| NM_001033310 | <i>Cox18</i>    | BXD100 | 2.87E-03 | -1.5 | 1.89E-03 | -1.5 |
| NM_001252525 | <i>Cpeb1</i>    | BXD100 | 9.02E-03 | 1.9  | NS       | NS   |
| NM_013499    | <i>Cr1l</i>     | BXD100 | 2.54E-02 | 1.5  | NS       | NS   |
| NM_172728    | <i>Creb5</i>    | BXD100 | 2.70E-06 | 2.7  | 4.47E-03 | 2.0  |
| NM_001110850 | <i>Crem</i>     | BXD100 | 1.83E-04 | 1.9  | 4.09E-06 | 2.2  |
| NM_007762    | <i>Crhr1</i>    | BXD100 | 1.81E-04 | -2.1 | 9.10E-06 | -2.4 |
| NM_030209    | <i>Crispld2</i> | BXD100 | NS       | NS   | 1.95E-02 | 2.0  |
| NM_153409    | <i>Csrnp3</i>   | BXD100 | 4.64E-02 | 1.3  | NS       | NS   |
| NM_007791    | <i>Csrp1</i>    | BXD100 | 1.49E-02 | 1.6  | NS       | NS   |
| NM_001145799 | <i>Ctla2a</i>   | BXD100 | NS       | NS   | 1.87E-02 | 1.8  |
| NM_031251    | <i>Ctns</i>     | BXD100 | 1.25E-02 | 1.5  | 1.94E-02 | 1.4  |
| NM_016748    | <i>Ctps</i>     | BXD100 | 1.96E-02 | -1.5 | 1.04E-02 | -1.6 |
| NM_007801    | <i>Ctsh</i>     | BXD100 | 1.59E-02 | 2.1  | NS       | NS   |
| NM_009984    | <i>Ctsl</i>     | BXD100 | 1.25E-02 | 1.5  | NS       | NS   |
| NM_153775    | <i>Ctu2</i>     | BXD100 | 4.13E-02 | -1.6 | NS       | NS   |
| NM_025567    | <i>Cyc1</i>     | BXD100 | 1.05E-02 | -1.5 | 5.67E-03 | -1.6 |
| NM_009994    | <i>Cyp1b1</i>   | BXD100 | 1.13E-04 | 2.9  | 1.14E-05 | 3.3  |
| NM_001177713 | <i>Cyp26b1</i>  | BXD100 | 7.67E-03 | -2.1 | 2.70E-02 | -1.9 |
| NM_028979    | <i>Cyp2j9</i>   | BXD100 | 5.22E-05 | 2.2  | 2.66E-02 | 1.7  |
| NM_130882    | <i>Cyp4f13</i>  | BXD100 | 3.46E-02 | 1.6  | NS       | NS   |
| NM_020010    | <i>Cyp51</i>    | BXD100 | 2.01E-03 | -1.4 | 5.77E-05 | -1.6 |
| NM_010012    | <i>Cyp8b1</i>   | BXD100 | NS       | NS   | 2.66E-02 | 1.5  |
| NM_010516    | <i>Cyr61</i>    | BXD100 | 3.25E-03 | 1.8  | NS       | NS   |
| NM_001081365 | <i>Cystm1</i>   | BXD100 | 1.63E-02 | 1.5  | NS       | NS   |
| NM_172911    | <i>D8Ert82e</i> | BXD100 | 6.77E-03 | 1.7  | NS       | NS   |
| NM_001146308 | <i>Dbnl</i>     | BXD100 | NS       | NS   | 5.54E-03 | -1.6 |
| NM_001165980 | <i>Dcaf17</i>   | BXD100 | 1.17E-02 | 1.4  | NS       | NS   |

|              |                 |        |          |      |          |      |
|--------------|-----------------|--------|----------|------|----------|------|
| NM_153555    | <i>Dcaf8</i>    | BXD100 | 4.63E-02 | 1.2  | NS       | NS   |
| NM_001080995 | <i>Ddias</i>    | BXD100 | 4.22E-02 | 1.7  | NS       | NS   |
| NM_007837    | <i>Ddit3</i>    | BXD100 | 2.33E-02 | 1.7  | NS       | NS   |
| NM_029083    | <i>Ddit4</i>    | BXD100 | 1.34E-02 | 1.7  | NS       | NS   |
| NM_019553    | <i>Ddx21</i>    | BXD100 | NS       | NS   | 2.62E-04 | -1.8 |
| NM_001252457 | <i>Ddx39b</i>   | BXD100 | 1.11E-02 | -1.3 | 2.74E-03 | -1.4 |
| NM_001282055 | <i>Ddx46</i>    | BXD100 | 3.29E-02 | -1.4 | NS       | NS   |
| NM_001037937 | <i>Deptor</i>   | BXD100 | NS       | NS   | 1.81E-02 | 1.8  |
| NM_053272    | <i>Dhcr24</i>   | BXD100 | 5.85E-11 | -1.9 | 7.27E-15 | -2.2 |
| NM_025522    | <i>Dhrs7</i>    | BXD100 | 6.11E-03 | 1.7  | NS       | NS   |
| NM_007842    | <i>Dhx9</i>     | BXD100 | 3.57E-02 | -1.3 | NS       | NS   |
| NM_028315    | <i>Dis3</i>     | BXD100 | NS       | NS   | 3.23E-02 | -1.5 |
| NM_001042487 | <i>Dlgap4</i>   | BXD100 | 2.21E-02 | -1.4 | NS       | NS   |
| NM_001286013 | <i>Dlk2</i>     | BXD100 | NS       | NS   | 3.60E-02 | -1.7 |
| NR_002854    | <i>Dlx1as</i>   | BXD100 | NS       | NS   | 2.35E-02 | -1.9 |
| NM_009584    | <i>Dnajc2</i>   | BXD100 | NS       | NS   | 2.92E-02 | -1.4 |
| NM_001163536 | <i>Dnajc5b</i>  | BXD100 | 2.79E-02 | -2.0 | NS       | NS   |
| NM_001285807 | <i>Dtna</i>     | BXD100 | 1.56E-03 | 1.4  | 2.30E-04 | 1.5  |
| NM_172442    | <i>Dtx4</i>     | BXD100 | 5.55E-03 | 1.4  | NS       | NS   |
| NM_013642    | <i>Dusp1</i>    | BXD100 | 1.34E-10 | 2.9  | 3.33E-10 | 2.8  |
| NM_019819    | <i>Dusp14</i>   | BXD100 | 6.53E-03 | 1.8  | NS       | NS   |
| NM_001048054 | <i>Dusp16</i>   | BXD100 | 1.63E-07 | 2.7  | 2.42E-03 | 1.9  |
| NM_026268    | <i>Dusp6</i>    | BXD100 | 1.50E-03 | -1.7 | 6.22E-03 | -1.6 |
| NM_008748    | <i>Dusp8</i>    | BXD100 | 3.96E-07 | 1.6  | 6.81E-04 | 1.4  |
| NM_001037957 | <i>Dyrk1b</i>   | BXD100 | NS       | NS   | 1.89E-04 | 1.6  |
| NM_001289920 | <i>E2f3</i>     | BXD100 | NS       | NS   | 2.37E-02 | -1.6 |
| NM_026932    | <i>Ebna1bp2</i> | BXD100 | 1.97E-02 | -1.4 | NS       | NS   |
| NM_001252653 | <i>Ecm1</i>     | BXD100 | NS       | NS   | 3.66E-02 | 1.6  |
| NM_010104    | <i>Edn1</i>     | BXD100 | 3.32E-03 | 2.7  | 3.53E-03 | 2.7  |
| NM_025380    | <i>Eef1e1</i>   | BXD100 | NS       | NS   | 3.12E-03 | -1.5 |
| NM_010108    | <i>Efna3</i>    | BXD100 | NS       | NS   | 6.22E-03 | -1.5 |
| NM_001289925 | <i>Egr3</i>     | BXD100 | 3.02E-09 | -3.2 | 1.67E-04 | -2.2 |
| NM_018781    | <i>Egr3</i>     | BXD100 | 2.88E-02 | -1.7 | NS       | NS   |
| NM_153068    | <i>Ehd2</i>     | BXD100 | NS       | NS   | 2.21E-02 | 2.0  |
| NM_010121    | <i>Eif2ak3</i>  | BXD100 | 3.39E-02 | 1.5  | 2.01E-02 | 1.5  |
| NM_018749    | <i>Eif3d</i>    | BXD100 | NS       | NS   | 3.66E-02 | -1.4 |
| NM_016876    | <i>Eif3g</i>    | BXD100 | NS       | NS   | 3.71E-03 | -1.5 |
| NM_138669    | <i>Eif4a3</i>   | BXD100 | 3.51E-02 | -1.4 | NS       | NS   |

|              |                |        |          |      |          |      |
|--------------|----------------|--------|----------|------|----------|------|
| NM_007917    | <i>Eif4e</i>   | BXD100 | 2.30E-02 | -1.3 | NS       | NS   |
| NM_001177883 | <i>Elavl2</i>  | BXD100 | NS       | NS   | 3.12E-03 | -1.4 |
| NM_001253692 | <i>Elmod3</i>  | BXD100 | 9.04E-03 | 1.5  | NS       | NS   |
| NM_130450    | <i>Elovl6</i>  | BXD100 | 1.14E-02 | -1.4 | NS       | NS   |
| NM_175101    | <i>Emc3</i>    | BXD100 | 1.54E-02 | 1.3  | NS       | NS   |
| NM_001146348 | <i>Eng</i>     | BXD100 | 3.23E-02 | 1.7  | NS       | NS   |
| NM_134005    | <i>Enpp3</i>   | BXD100 | 3.41E-02 | 1.7  | NS       | NS   |
| NM_001168620 | <i>Enpp5</i>   | BXD100 | 3.66E-04 | 1.5  | NS       | NS   |
| NM_175313    | <i>Eogt</i>    | BXD100 | NS       | NS   | 3.57E-02 | 1.5  |
| NM_010145    | <i>Ephx1</i>   | BXD100 | 4.95E-02 | 2.0  | NS       | NS   |
| NM_153592    | <i>Erlin2</i>  | BXD100 | 4.67E-02 | 1.4  | NS       | NS   |
| NM_023612    | <i>Esm1</i>    | BXD100 | 3.95E-02 | 1.8  | NS       | NS   |
| NM_029250    | <i>Etnk1</i>   | BXD100 | 2.96E-02 | 1.4  | NS       | NS   |
| NM_008815    | <i>Etv4</i>    | BXD100 | 2.79E-03 | -1.7 | NS       | NS   |
| NM_023794    | <i>Etv5</i>    | BXD100 | 2.07E-02 | -1.6 | 2.66E-04 | -1.9 |
| NM_001252192 | <i>Eya1</i>    | BXD100 | NS       | NS   | 3.95E-02 | 1.4  |
| NM_007970    | <i>Ezh1</i>    | BXD100 | 8.85E-03 | 1.4  | 1.05E-02 | 1.4  |
| NM_010171    | <i>F3</i>      | BXD100 | 3.27E-02 | 1.5  | NS       | NS   |
| NM_007983    | <i>Faf1</i>    | BXD100 | 5.55E-03 | -1.4 | NS       | NS   |
| NM_183187    | <i>Fam107a</i> | BXD100 | 6.60E-07 | 3.6  | 1.11E-05 | 3.2  |
| NM_028672    | <i>Fam161a</i> | BXD100 | 1.31E-02 | 2.3  | NS       | NS   |
| NM_182808    | <i>Fam19a1</i> | BXD100 | NS       | NS   | 2.81E-02 | 1.5  |
| NM_001113283 | <i>Fam214a</i> | BXD100 | NS       | NS   | 4.02E-02 | 1.6  |
| NM_001172216 | <i>Fam221a</i> | BXD100 | 4.09E-02 | 1.5  | NS       | NS   |
| NM_178908    | <i>Fam26e</i>  | BXD100 | 6.61E-06 | 2.2  | 1.06E-03 | 1.9  |
| NM_175104    | <i>Fam53c</i>  | BXD100 | 4.47E-04 | 2.0  | NS       | NS   |
| NM_178797    | <i>Far2</i>    | BXD100 | 3.95E-02 | -1.4 | 1.06E-03 | -1.5 |
| NM_007988    | <i>Fasn</i>    | BXD100 | NS       | NS   | 3.53E-02 | -1.4 |
| NM_001081034 | <i>Fbxo11</i>  | BXD100 | 1.80E-02 | -1.2 | NS       | NS   |
| NM_172591    | <i>Fcho2</i>   | BXD100 | 2.68E-02 | 1.4  | NS       | NS   |
| NM_010191    | <i>Fdft1</i>   | BXD100 | 2.48E-08 | -1.7 | 6.89E-10 | -1.8 |
| NM_001253751 | <i>Fdps</i>    | BXD100 | 4.88E-02 | -1.5 | 2.20E-03 | -1.7 |
| NM_028263    | <i>Fgfbp3</i>  | BXD100 | NS       | NS   | 2.17E-03 | -1.6 |
| NM_001163215 | <i>Fgfr3</i>   | BXD100 | 5.48E-05 | 2.0  | 1.15E-03 | 1.8  |
| NM_001164259 | <i>Fgfrl1</i>  | BXD100 | 1.42E-02 | -1.6 | 1.15E-02 | -1.6 |
| NM_001081243 | <i>Filip1</i>  | BXD100 | NS       | NS   | 3.71E-02 | 1.7  |
| NM_010219    | <i>Fkbp4</i>   | BXD100 | 3.62E-02 | -1.3 | 5.32E-03 | -1.4 |
| NM_134080    | <i>Flnb</i>    | BXD100 | NS       | NS   | 7.01E-03 | 1.7  |

|              |                 |        |          |      |          |      |
|--------------|-----------------|--------|----------|------|----------|------|
| NM_010228    | <i>Flt1</i>     | BXD100 | NS       | NS   | 2.57E-02 | 1.4  |
| NM_001159706 | <i>Folh1</i>    | BXD100 | 1.08E-03 | 2.3  | 3.89E-03 | 2.1  |
| NM_028428    | <i>Fut11</i>    | BXD100 | 3.49E-02 | 1.4  | NS       | NS   |
| NM_011817    | <i>Gadd45g</i>  | BXD100 | 1.11E-02 | 2.0  | NS       | NS   |
| NM_001081421 | <i>Galnt16</i>  | BXD100 | 4.07E-02 | 1.4  | NS       | NS   |
| NM_173739    | <i>Galnt18</i>  | BXD100 | 2.21E-02 | -1.7 | NS       | NS   |
| NM_001190406 | <i>Gas2l1</i>   | BXD100 | 2.21E-02 | 1.5  | NS       | NS   |
| NM_028022    | <i>Gatsl3</i>   | BXD100 | NS       | NS   | 1.47E-02 | 2.1  |
| NM_018771    | <i>Gipc1</i>    | BXD100 | NS       | NS   | 4.19E-02 | -1.5 |
| NM_010288    | <i>Gja1</i>     | BXD100 | 4.19E-02 | 1.4  | NS       | NS   |
| NM_001271628 | <i>Gja5</i>     | BXD100 | NS       | NS   | 8.85E-05 | 2.7  |
| NM_027450    | <i>Glipr2</i>   | BXD100 | 4.24E-02 | 1.6  | NS       | NS   |
| NM_029102    | <i>Glt8d2</i>   | BXD100 | 4.76E-03 | 2.2  | NS       | NS   |
| NM_001081418 | <i>Gltscr1</i>  | BXD100 | 2.96E-02 | -1.7 | NS       | NS   |
| NM_001100452 | <i>Gltscr1l</i> | BXD100 | 1.31E-02 | 1.4  | NS       | NS   |
| ENSMUST0000  |                 |        |          |      |          | NS   |
| 0123179      | <i>Gm12666</i>  | BXD100 | 3.70E-02 | -1.4 | NS       |      |
| uc008vqj.1   | <i>Gm13089</i>  | BXD100 | 4.64E-02 | -1.8 | NS       | NS   |
| ENSMUST0000  |                 |        |          |      |          | NS   |
| 0115553      | <i>Gm14862</i>  | BXD100 | 3.79E-02 | 1.6  | NS       |      |
| NM_001195529 | <i>Gm4980</i>   | BXD100 | 3.32E-02 | 1.6  | NS       | NS   |
| NM_010313    | <i>Gnb5</i>     | BXD100 | 2.38E-02 | -1.4 | NS       | NS   |
| NM_001190414 | <i>Gne</i>      | BXD100 | NS       | NS   | 7.06E-03 | -1.5 |
| NM_001177669 | <i>Golph3l</i>  | BXD100 | 1.42E-02 | 1.5  | NS       | NS   |
| NM_008149    | <i>Gpam</i>     | BXD100 | 3.54E-03 | 1.4  | NS       | NS   |
| NM_001110809 | <i>Gpatch4</i>  | BXD100 | 1.50E-03 | -1.8 | 7.37E-03 | -1.7 |
| NM_145965    | <i>Gphn</i>     | BXD100 | 2.21E-02 | -1.3 | NS       | NS   |
| NM_027518    | <i>Gpr137c</i>  | BXD100 | 4.39E-09 | 2.2  | 9.36E-07 | 2.0  |
| NM_001167694 | <i>Gpr19</i>    | BXD100 | 9.04E-03 | 1.5  | NS       | NS   |
| NM_173410    | <i>Gpr26</i>    | BXD100 | 3.29E-02 | -1.5 | NS       | NS   |
| NM_010338    | <i>Gpr37</i>    | BXD100 | 7.08E-03 | 1.7  | 4.60E-03 | 1.7  |
| NM_145066    | <i>Gpr85</i>    | BXD100 | 6.34E-03 | 1.5  | 1.57E-02 | 1.5  |
| NM_001195774 | <i>Gprc5b</i>   | BXD100 | 1.03E-02 | 1.5  | NS       | NS   |
| NM_012014    | <i>Gprin1</i>   | BXD100 | 3.15E-02 | -1.4 | NS       | NS   |
| NM_001177874 | <i>Gps1</i>     | BXD100 | NS       | NS   | 3.61E-02 | -1.3 |
| NM_173866    | <i>Gpt2</i>     | BXD100 | NS       | NS   | 4.02E-02 | 1.5  |
| NM_001159507 | <i>Grip2</i>    | BXD100 | NS       | NS   | 4.52E-02 | -1.6 |
| NM_001114333 | <i>Grm1</i>     | BXD100 | 1.96E-02 | 1.5  | NS       | NS   |
| NM_153419    | <i>Grwd1</i>    | BXD100 | NS       | NS   | 5.16E-03 | -1.9 |

|              |                 |        |          |      |          |      |
|--------------|-----------------|--------|----------|------|----------|------|
| NM_010358    | <i>Gstm1</i>    | BXD100 | 1.09E-02 | 1.4  | NS       | NS   |
| NM_001160411 | <i>Gstm4</i>    | BXD100 | 2.21E-02 | 1.5  | NS       | NS   |
| NM_001033322 | <i>Gucy1a2</i>  | BXD100 | 3.95E-02 | 1.5  | NS       | NS   |
| NM_010389    | <i>H2-Ob</i>    | BXD100 | 2.70E-02 | -1.6 | NS       | NS   |
| NM_008214    | <i>Hars</i>     | BXD100 | NS       | NS   | 4.58E-02 | -1.3 |
| NM_008216    | <i>Has2</i>     | BXD100 | 3.25E-03 | -2.5 | NS       | NS   |
| NM_001081192 | <i>Hcn4</i>     | BXD100 | NS       | NS   | 2.01E-02 | -1.6 |
| NM_198962    | <i>Hcrtr2</i>   | BXD100 | 8.09E-04 | -2.0 | 1.95E-02 | -1.7 |
| NM_144835    | <i>Heatr1</i>   | BXD100 | 1.14E-02 | -1.6 | 3.04E-03 | -1.7 |
| NM_175256    | <i>Heg1</i>     | BXD100 | 3.95E-02 | 1.5  | 3.50E-03 | 1.7  |
| NM_001162950 | <i>Hif3a</i>    | BXD100 | 4.95E-02 | 1.9  | NS       | NS   |
| NM_010432    | <i>Hipk1</i>    | BXD100 | 4.64E-02 | 1.3  | NS       | NS   |
| NM_025812    | <i>Hmg20a</i>   | BXD100 | 4.09E-03 | 1.5  | 4.98E-03 | 1.5  |
| NM_008255    | <i>Hmgcr</i>    | BXD100 | 3.45E-06 | -1.9 | 1.24E-04 | -1.7 |
| NM_008256    | <i>Hmgcs2</i>   | BXD100 | 3.47E-04 | 2.6  | 7.32E-03 | 2.2  |
| NM_007545    | <i>Hrk</i>      | BXD100 | NS       | NS   | 1.74E-03 | 1.8  |
| NM_010476    | <i>Hsd17b7</i>  | BXD100 | 6.24E-05 | -1.7 | 6.28E-05 | -1.8 |
| NM_024255    | <i>Hsdl2</i>    | BXD100 | 4.95E-03 | 1.6  | NS       | NS   |
| NM_010481    | <i>Hspa9</i>    | BXD100 | 1.03E-02 | -1.4 | NS       | NS   |
| NM_019564    | <i>Htra1</i>    | BXD100 | 2.87E-03 | 1.8  | 3.33E-03 | 1.8  |
| NM_015755    | <i>Hunk</i>     | BXD100 | 2.29E-03 | -1.9 | NS       | NS   |
| NM_015790    | <i>Icosl</i>    | BXD100 | 1.43E-04 | 2.1  | 1.48E-02 | 1.7  |
| NM_010495    | <i>Id1</i>      | BXD100 | 3.66E-04 | 2.1  | NS       | NS   |
| NM_031166    | <i>Id4</i>      | BXD100 | 7.06E-03 | 2.2  | NS       | NS   |
| NM_145360    | <i>Idi1</i>     | BXD100 | 1.41E-13 | -2.9 | 3.06E-10 | -2.4 |
| NM_001101605 | <i>Ifit1bl1</i> | BXD100 | 1.30E-03 | 2.3  | NS       | NS   |
| NM_199157    | <i>Ifnk</i>     | BXD100 | 2.21E-02 | 1.9  | NS       | NS   |
| NM_013562    | <i>Ifrd1</i>    | BXD100 | 3.23E-02 | -1.6 | 3.65E-02 | -1.5 |
| NM_010515    | <i>Igf2r</i>    | BXD100 | 3.41E-02 | 1.5  | NS       | NS   |
| NM_010518    | <i>Igfbp5</i>   | BXD100 | 2.83E-02 | 1.5  | NS       | NS   |
| NM_001162884 | <i>Igsf10</i>   | BXD100 | 1.39E-02 | 1.7  | NS       | NS   |
| NM_001123382 | <i>Il1r1</i>    | BXD100 | 1.78E-02 | 1.9  | 1.98E-02 | 1.9  |
| NM_023626    | <i>Ing3</i>     | BXD100 | NS       | NS   | 3.95E-02 | 1.4  |
| NM_172439    | <i>Inpp5j</i>   | BXD100 | 1.31E-02 | 1.7  | 1.04E-02 | 1.8  |
| NM_153526    | <i>Insig1</i>   | BXD100 | 2.20E-07 | -2.4 | 7.87E-07 | -2.3 |
| NM_010568    | <i>Insr</i>     | BXD100 | 1.97E-02 | 1.3  | NS       | NS   |
| NM_029634    | <i>Ip6k2</i>    | BXD100 | 9.93E-03 | 1.4  | NS       | NS   |
| NM_001164598 | <i>Irf2bp2</i>  | BXD100 | NS       | NS   | 6.18E-03 | 1.4  |

|              |                |        |          |      |          |      |
|--------------|----------------|--------|----------|------|----------|------|
| NM_016851    | <i>Irf6</i>    | BXD100 | NS       | NS   | 6.20E-03 | 1.8  |
| NM_001081212 | <i>Irs2</i>    | BXD100 | 2.69E-02 | 1.5  | NS       | NS   |
| NM_001276489 | <i>Ism1</i>    | BXD100 | 3.23E-02 | 1.8  | NS       | NS   |
| NM_177290    | <i>Itgb8</i>   | BXD100 | 2.70E-02 | 1.6  | NS       | NS   |
| NM_001168277 | <i>Jazf1</i>   | BXD100 | 3.41E-02 | -1.5 | NS       | NS   |
| NM_033398    | <i>Jmjd6</i>   | BXD100 | NS       | NS   | 2.66E-02 | -1.4 |
| NM_010591    | <i>Jun</i>     | BXD100 | 5.70E-17 | 4.0  | 1.05E-13 | 3.3  |
| NM_001286944 | <i>Jund</i>    | BXD100 | 2.41E-05 | 1.8  | 2.63E-02 | 1.5  |
| NM_001081134 | <i>Kcng1</i>   | BXD100 | 2.61E-05 | -2.2 | 2.03E-03 | -1.9 |
| NM_008428    | <i>Kcnj8</i>   | BXD100 | NS       | NS   | 3.66E-02 | -1.8 |
| NM_001033525 | <i>Kcnk6</i>   | BXD100 | NS       | NS   | 2.20E-02 | 1.6  |
| NM_032397    | <i>Kcnn1</i>   | BXD100 | 1.14E-02 | -1.7 | NS       | NS   |
| NM_026200    | <i>Kcnv1</i>   | BXD100 | NS       | NS   | 1.10E-02 | -1.7 |
| NM_026135    | <i>Kctd16</i>  | BXD100 | NS       | NS   | 2.66E-02 | 1.6  |
| NM_026214    | <i>Kctd4</i>   | BXD100 | NS       | NS   | 6.39E-03 | 1.4  |
| NM_011317    | <i>Khdrbs1</i> | BXD100 | NS       | NS   | 2.41E-03 | -1.5 |
| NM_001145779 | <i>Kif2a</i>   | BXD100 | NS       | NS   | 3.44E-02 | -1.3 |
| NM_008451    | <i>Klc2</i>    | BXD100 | 4.40E-02 | -1.3 | NS       | NS   |
| NM_078477    | <i>Klf16</i>   | BXD100 | 8.43E-03 | -1.6 | 1.75E-04 | -1.9 |
| NM_011803    | <i>Klf6</i>    | BXD100 | NS       | NS   | 1.82E-02 | -1.5 |
| NM_153128    | <i>Klhl12</i>  | BXD100 | 4.87E-02 | 1.5  | NS       | NS   |
| NM_029436    | <i>Klhl24</i>  | BXD100 | 8.43E-03 | 1.4  | 1.22E-02 | 1.4  |
| NM_178741    | <i>Klhl8</i>   | BXD100 | NS       | NS   | 4.66E-02 | -1.5 |
| NM_010655    | <i>Kpna2</i>   | BXD100 | 5.35E-03 | -1.5 | 3.50E-03 | -1.5 |
| NM_008481    | <i>Lama2</i>   | BXD100 | NS       | NS   | 2.66E-02 | 1.8  |
| NM_001077398 | <i>Ldb2</i>    | BXD100 | NS       | NS   | 3.71E-02 | -1.5 |
| NM_001252658 | <i>Ldlr</i>    | BXD100 | 6.94E-05 | -2.4 | 2.00E-05 | -2.5 |
| NM_173012    | <i>Letm2</i>   | BXD100 | 2.21E-02 | 1.6  | NS       | NS   |
| NM_134093    | <i>Letmd1</i>  | BXD100 | 4.07E-02 | 1.3  | NS       | NS   |
| NM_008494    | <i>Lfng</i>    | BXD100 | 3.44E-06 | 1.9  | NS       | NS   |
| NM_001199043 | <i>Lgals8</i>  | BXD100 | NS       | NS   | 1.69E-02 | 1.5  |
| NM_001113386 | <i>Lifr</i>    | BXD100 | 4.95E-02 | 1.4  | NS       | NS   |
| NM_013860    | <i>Limd1</i>   | BXD100 | 3.15E-02 | 1.9  | NS       | NS   |
| NM_181074    | <i>Lingo1</i>  | BXD100 | 1.13E-04 | -1.4 | 2.21E-02 | -1.3 |
| NM_001013758 | <i>Lingo3</i>  | BXD100 | 2.81E-02 | -1.5 | NS       | NS   |
| NM_201529    | <i>Lmo7</i>    | BXD100 | NS       | NS   | 4.59E-03 | 1.5  |
| NM_001159577 | <i>Lnx1</i>    | BXD100 | 1.93E-02 | 1.7  | NS       | NS   |
| NM_145376    | <i>Lpcat1</i>  | BXD100 | NS       | NS   | 2.00E-02 | -1.3 |

|              |                 |        |          |      |          |      |
|--------------|-----------------|--------|----------|------|----------|------|
| NM_001145952 | <i>Lpp</i>      | BXD100 | 1.91E-02 | 1.7  | 2.27E-02 | 1.6  |
| NM_001146048 | <i>Lrrc1</i>    | BXD100 | 3.46E-03 | 2.0  | NS       | NS   |
| NM_145152    | <i>Lrrc3</i>    | BXD100 | 4.24E-02 | -1.6 | NS       | NS   |
| NM_133807    | <i>Lrrc59</i>   | BXD100 | 4.21E-02 | -1.3 | 3.53E-02 | -1.3 |
| NM_010732    | <i>Lrrn2</i>    | BXD100 | 2.03E-03 | -1.7 | NS       | NS   |
| NM_001271416 | <i>Ly6a</i>     | BXD100 | NS       | NS   | 1.89E-03 | 2.3  |
| NM_001252055 | <i>Ly6c1</i>    | BXD100 | 6.49E-04 | 2.6  | 2.30E-04 | 2.7  |
| NM_053201    | <i>Magee1</i>   | BXD100 | 3.23E-02 | -1.3 | NS       | NS   |
| NM_001029850 | <i>Magi1</i>    | BXD100 | 4.48E-02 | 1.3  | NS       | NS   |
| NM_001171187 | <i>Mal</i>      | BXD100 | 3.93E-02 | 1.7  | 1.09E-03 | 2.1  |
| NM_010764    | <i>Man2b1</i>   | BXD100 | NS       | NS   | 4.00E-02 | 1.6  |
| NM_011948    | <i>Map3k4</i>   | BXD100 | NS       | NS   | 1.04E-02 | 1.6  |
| NM_011161    | <i>Mapk11</i>   | BXD100 | NS       | NS   | 4.09E-02 | -1.6 |
| NM_001045483 | <i>Mapk1ip1</i> | BXD100 | NS       | NS   | 9.02E-03 | 1.4  |
| NM_011841    | <i>Mapk7</i>    | BXD100 | 4.48E-03 | -1.5 | 3.04E-03 | -1.5 |
| NM_175171    | <i>Mast4</i>    | BXD100 | NS       | NS   | 6.39E-03 | 1.4  |
| NM_010770    | <i>Matn3</i>    | BXD100 | NS       | NS   | 4.95E-02 | -1.6 |
| NM_010773    | <i>Mbd2</i>     | BXD100 | NS       | NS   | 1.14E-02 | 1.4  |
| NM_175341    | <i>Mbnl2</i>    | BXD100 | NS       | NS   | 6.89E-04 | 1.6  |
| NM_008563    | <i>Mcm3</i>     | BXD100 | 1.03E-03 | -2.0 | NS       | NS   |
| NM_008566    | <i>Mcm5</i>     | BXD100 | 1.76E-02 | -1.8 | NS       | NS   |
| NM_008587    | <i>Mertk</i>    | BXD100 | 8.69E-03 | 2.0  | 2.08E-03 | 2.2  |
| NM_008591    | <i>Met</i>      | BXD100 | NS       | NS   | 3.67E-02 | -1.7 |
| NM_027334    | <i>Mettl7a1</i> | BXD100 | 7.89E-04 | 1.9  | NS       | NS   |
| NM_029662    | <i>Mfsd2a</i>   | BXD100 | 1.20E-02 | 1.6  | NS       | NS   |
| NM_023799    | <i>Mgea5</i>    | BXD100 | 1.95E-04 | 1.4  | 8.80E-04 | 1.4  |
| NM_021565    | <i>Midn</i>     | BXD100 | 1.74E-02 | -1.4 | NS       | NS   |
| NM_001243584 | <i>Mif4gd</i>   | BXD100 | 2.00E-02 | 1.6  | NS       | NS   |
| NM_001122667 | <i>Mkl2</i>     | BXD100 | NS       | NS   | 4.06E-02 | 1.3  |
| NM_001285487 | <i>Mknk1</i>    | BXD100 | 3.57E-02 | 1.6  | NS       | NS   |
| NM_008609    | <i>Mmp15</i>    | BXD100 | 9.04E-03 | -1.6 | 6.60E-03 | -1.6 |
| NM_023773    | <i>Mphosph8</i> | BXD100 | NS       | NS   | 1.15E-02 | -1.5 |
| NM_001101482 | <i>Mrap2</i>    | BXD100 | 8.30E-03 | 1.8  | NS       | NS   |
| NM_027204    | <i>Mrpl12</i>   | BXD100 | NS       | NS   | 3.11E-02 | -1.4 |
| NM_026490    | <i>Mrpl19</i>   | BXD100 | NS       | NS   | 3.23E-02 | -1.3 |
| NM_053164    | <i>Mrpl43</i>   | BXD100 | NS       | NS   | 8.35E-04 | -1.7 |
| NM_026035    | <i>Mrpl55</i>   | BXD100 | NS       | NS   | 1.81E-02 | -1.5 |
| NM_025436    | <i>Msmo1</i>    | BXD100 | 2.39E-08 | -2.6 | 1.27E-06 | -2.4 |

|              |                |        |          |      |          |      |
|--------------|----------------|--------|----------|------|----------|------|
| NM_010834    | <i>Mstn</i>    | BXD100 | 3.41E-02 | 2.0  | NS       | NS   |
| NM_013602    | <i>Mt1</i>     | BXD100 | 3.96E-07 | 2.0  | 7.56E-04 | 1.7  |
| NM_008630    | <i>Mt2</i>     | BXD100 | 4.43E-10 | 3.6  | 4.00E-06 | 2.7  |
| NM_023431    | <i>Mum1</i>    | BXD100 | NS       | NS   | 3.09E-02 | -1.4 |
| NM_001164630 | <i>Mum1l1</i>  | BXD100 | 4.19E-02 | 1.7  | NS       | NS   |
| NM_138656    | <i>Mvd</i>     | BXD100 | 6.60E-07 | -2.4 | 3.11E-07 | -2.5 |
| NM_023556    | <i>Mvk</i>     | BXD100 | NS       | NS   | 4.82E-02 | -1.6 |
| NM_010753    | <i>Mxd4</i>    | BXD100 | 6.64E-03 | 1.7  | NS       | NS   |
| NM_001008542 | <i>Mxi1</i>    | BXD100 | 3.01E-11 | 2.1  | 2.55E-06 | 1.7  |
| NM_001171615 | <i>Myt1</i>    | BXD100 | 2.00E-02 | 1.6  | 6.99E-03 | 1.6  |
| NM_001024917 | <i>N4bp2</i>   | BXD100 | 6.11E-03 | 1.7  | NS       | NS   |
| NM_030153    | <i>Naa35</i>   | BXD100 | NS       | NS   | 3.60E-02 | -1.4 |
| NM_001040395 | <i>Nadk2</i>   | BXD100 | 2.28E-03 | 1.5  | NS       | NS   |
| NM_001081475 | <i>Nasp</i>    | BXD100 | NS       | NS   | 1.91E-02 | -1.6 |
| NM_001114085 | <i>Nde1</i>    | BXD100 | 4.19E-02 | 1.5  | 8.10E-03 | 1.7  |
| NM_023239    | <i>Ndn12</i>   | BXD100 | 8.07E-03 | 1.7  | NS       | NS   |
| NM_001145959 | <i>Ndr2</i>    | BXD100 | NS       | NS   | 2.91E-02 | 1.3  |
| NM_027244    | <i>Ndufa11</i> | BXD100 | NS       | NS   | 3.89E-02 | -1.4 |
| NM_026742    | <i>Ndufaf4</i> | BXD100 | 1.80E-06 | -1.8 | 1.44E-02 | -1.4 |
| NM_028757    | <i>Nebl</i>    | BXD100 | NS       | NS   | 4.44E-02 | 1.6  |
| NM_001111324 | <i>Nedd9</i>   | BXD100 | 1.93E-02 | 1.5  | NS       | NS   |
| NM_010904    | <i>Nefh</i>    | BXD100 | 3.40E-02 | -1.8 | NS       | NS   |
| NM_010914    | <i>Nfyb</i>    | BXD100 | NS       | NS   | 4.97E-02 | -1.3 |
| NM_001048168 | <i>Nfyc</i>    | BXD100 | NS       | NS   | 2.37E-02 | -1.4 |
| NM_026472    | <i>Nifk</i>    | BXD100 | NS       | NS   | 2.66E-02 | -1.3 |
| NM_207204    | <i>Ninl</i>    | BXD100 | 2.93E-02 | -1.7 | NS       | NS   |
| NM_145469    | <i>Nipal2</i>  | BXD100 | 1.44E-02 | 1.5  | NS       | NS   |
| NM_028995    | <i>Nipal3</i>  | BXD100 | 1.30E-03 | 1.8  | NS       | NS   |
| NM_001163387 | <i>Nlgn1</i>   | BXD100 | NS       | NS   | 1.94E-02 | 1.3  |
| NM_029447    | <i>Nln</i>     | BXD100 | 2.17E-02 | -1.5 | NS       | NS   |
| NM_080637    | <i>Nme5</i>    | BXD100 | 4.99E-02 | 1.9  | NS       | NS   |
| NM_021303    | <i>Noc2l</i>   | BXD100 | NS       | NS   | 8.35E-04 | -1.6 |
| NM_009834    | <i>Noct</i>    | BXD100 | NS       | NS   | 4.92E-04 | -1.7 |
| NM_001008421 | <i>Nol10</i>   | BXD100 | 1.30E-03 | -1.8 | 5.32E-03 | -1.7 |
| NM_001001986 | <i>Nol4l</i>   | BXD100 | 1.74E-03 | -1.6 | 3.62E-03 | -1.6 |
| NM_024193    | <i>Nop56</i>   | BXD100 | 2.87E-03 | -1.7 | NS       | NS   |
| NM_018868    | <i>Nop58</i>   | BXD100 | NS       | NS   | 1.45E-02 | -1.4 |
| NM_010342    | <i>Npbwr1</i>  | BXD100 | 3.93E-02 | 1.6  | NS       | NS   |



|              |                 |        |          |      |          |      |
|--------------|-----------------|--------|----------|------|----------|------|
| NM_028749    | <i>Npl</i>      | BXD100 | 4.19E-02 | 1.6  | NS       | NS   |
| NM_008723    | <i>Npm3</i>     | BXD100 | NS       | NS   | 4.98E-03 | -1.7 |
| NM_015743    | <i>Nr4a3</i>    | BXD100 | 2.21E-02 | -1.4 | NS       | NS   |
| NM_010941    | <i>Nsdhl</i>    | BXD100 | NS       | NS   | 4.50E-03 | -1.4 |
| NM_001164363 | <i>Nt5c2</i>    | BXD100 | 3.49E-04 | 1.5  | 3.81E-02 | 1.3  |
| NM_001190179 | <i>Nup35</i>    | BXD100 | 3.72E-02 | -1.4 | NS       | NS   |
| NM_008751    | <i>Nxph1</i>    | BXD100 | NS       | NS   | 2.57E-02 | -1.4 |
| NM_001161430 | <i>Nxt2</i>     | BXD100 | 2.51E-02 | 1.4  | NS       | NS   |
| NM_146796    | <i>Olfr1499</i> | BXD100 | 4.76E-02 | -1.7 | NS       | NS   |
| NM_145517    | <i>Ormdl1</i>   | BXD100 | 2.76E-02 | 1.6  | NS       | NS   |
| NM_001134791 | <i>Osbpl9</i>   | BXD100 | 9.62E-06 | 1.5  | 3.53E-05 | 1.5  |
| NM_001008497 | <i>P2ry14</i>   | BXD100 | 4.41E-02 | 1.9  | NS       | NS   |
| NM_026420    | <i>Paip2</i>    | BXD100 | 2.61E-04 | 1.4  | 2.46E-02 | 1.3  |
| NM_146169    | <i>Paip2b</i>   | BXD100 | NS       | NS   | 2.63E-02 | 1.5  |
| NM_028829    | <i>Paqr8</i>    | BXD100 | 1.01E-03 | 1.6  | 2.12E-04 | 1.6  |
| NM_177460    | <i>Parp16</i>   | BXD100 | 5.37E-04 | 1.9  | NS       | NS   |
| NM_145619    | <i>Parp3</i>    | BXD100 | NS       | NS   | 4.95E-02 | 1.7  |
| NM_011865    | <i>Pcbp1</i>    | BXD100 | 1.17E-02 | -1.4 | 4.17E-02 | -1.3 |
| NM_183028    | <i>Pcmttd1</i>  | BXD100 | NS       | NS   | 3.79E-02 | 1.3  |
| NM_153594    | <i>Pcmttd2</i>  | BXD100 | 2.98E-03 | 1.7  | 1.30E-02 | 1.6  |
| NM_024229    | <i>Pcyt2</i>    | BXD100 | 9.15E-03 | -1.6 | NS       | NS   |
| NM_001177980 | <i>Pde4b</i>    | BXD100 | 8.97E-04 | 1.5  | NS       | NS   |
| NM_008808    | <i>Pdgfa</i>    | BXD100 | NS       | NS   | 6.60E-03 | -1.5 |
| NM_011057    | <i>Pdgfb</i>    | BXD100 | 3.29E-02 | -1.6 | NS       | NS   |
| NM_001163794 | <i>Pdik1l</i>   | BXD100 | NS       | NS   | 4.95E-02 | -1.4 |
| NM_013743    | <i>Pdk4</i>     | BXD100 | 1.63E-02 | 1.7  | NS       | NS   |
| NM_016861    | <i>Pdlim1</i>   | BXD100 | 4.07E-02 | 2.0  | 1.63E-02 | 2.1  |
| NM_001159367 | <i>Per1</i>     | BXD100 | 7.59E-05 | 1.9  | 1.74E-03 | 1.7  |
| NM_022889    | <i>Pes1</i>     | BXD100 | 2.21E-02 | -1.3 | NS       | NS   |
| NM_134025    | <i>Pex12</i>    | BXD100 | 4.76E-02 | 1.5  | NS       | NS   |
| NM_025954    | <i>Pgp</i>      | BXD100 | NS       | NS   | 2.40E-02 | -1.4 |
| NM_008831    | <i>Phb</i>      | BXD100 | NS       | NS   | 5.04E-03 | -1.4 |
| NM_024250    | <i>Phf10</i>    | BXD100 | 2.07E-02 | -1.4 | NS       | NS   |
| NM_001109690 | <i>Phf21a</i>   | BXD100 | 4.68E-02 | 1.5  | NS       | NS   |
| NM_053191    | <i>Pi15</i>     | BXD100 | 3.27E-02 | 1.8  | NS       | NS   |
| NM_001145926 | <i>Pianp</i>    | BXD100 | NS       | NS   | 4.06E-02 | -1.5 |
| NM_178149    | <i>Pik3ip1</i>  | BXD100 | 1.55E-07 | 2.7  | 3.84E-04 | 2.0  |
| NM_001024955 | <i>Pik3r1</i>   | BXD100 | 1.41E-13 | 2.1  | 1.87E-15 | 2.3  |

|              |                 |        |          |      |          |      |
|--------------|-----------------|--------|----------|------|----------|------|
| NM_145478    | <i>Pim3</i>     | BXD100 | 2.44E-02 | -1.8 | NS       | NS   |
| NM_028228    | <i>Pinx1</i>    | BXD100 | NS       | NS   | 1.04E-02 | -1.6 |
| NM_139269    | <i>Pla2g16</i>  | BXD100 | 2.00E-02 | 2.0  | NS       | NS   |
| NM_001004762 | <i>Pla2g4c</i>  | BXD100 | 3.81E-02 | -1.8 | NS       | NS   |
| NM_008872    | <i>Plat</i>     | BXD100 | 5.23E-05 | 2.0  | 2.27E-02 | 1.6  |
| NM_152813    | <i>Plcd3</i>    | BXD100 | 8.47E-03 | 1.7  | 1.53E-02 | 1.7  |
| NM_001081456 | <i>Plcd4</i>    | BXD100 | 3.85E-03 | 1.8  | 2.78E-02 | 1.6  |
| NM_001033253 | <i>Plekhg1</i>  | BXD100 | 1.90E-04 | 1.9  | 9.10E-06 | 2.1  |
| NM_013807    | <i>Plk3</i>     | BXD100 | 1.48E-04 | -1.9 | 1.08E-04 | -1.9 |
| NM_008884    | <i>Pml</i>      | BXD100 | NS       | NS   | 3.79E-02 | 1.5  |
| NM_025443    | <i>Pno1</i>     | BXD100 | NS       | NS   | 4.90E-02 | -1.5 |
| NM_001033225 | <i>Pnrc1</i>    | BXD100 | 3.07E-02 | 1.3  | NS       | NS   |
| NM_026383    | <i>Pnrc2</i>    | BXD100 | 6.79E-04 | 1.6  | 8.92E-03 | 1.4  |
| NM_009086    | <i>Polr1b</i>   | BXD100 | NS       | NS   | 5.46E-03 | -1.8 |
| NM_029763    | <i>Polr3f</i>   | BXD100 | NS       | NS   | 3.35E-02 | -1.4 |
| NM_133249    | <i>Ppargc1b</i> | BXD100 | NS       | NS   | 1.97E-02 | -1.7 |
| NM_008014    | <i>Ppm1g</i>    | BXD100 | NS       | NS   | 1.32E-03 | -1.4 |
| NM_008889    | <i>Ppp1r14b</i> | BXD100 | NS       | NS   | 2.61E-02 | -1.5 |
| NM_027242    | <i>Ppp1r35</i>  | BXD100 | NS       | NS   | 2.92E-02 | -1.6 |
| NM_001161362 | <i>Ppp2r3a</i>  | BXD100 | 2.85E-02 | 1.4  | NS       | NS   |
| NM_001164198 | <i>Prkacb</i>   | BXD100 | 1.06E-02 | 1.4  | NS       | NS   |
| NM_001252476 | <i>Prmt1</i>    | BXD100 | NS       | NS   | 1.35E-03 | -1.7 |
| NM_145404    | <i>Prmt7</i>    | BXD100 | 4.54E-04 | -1.6 | 2.59E-03 | -1.5 |
| NM_201371    | <i>Prmt8</i>    | BXD100 | 1.20E-04 | -1.4 | 2.08E-03 | -1.4 |
| NM_027626    | <i>Psd3</i>     | BXD100 | NS       | NS   | 1.35E-02 | 1.4  |
| NM_177698    | <i>Psd3</i>     | BXD100 | NS       | NS   | 3.32E-02 | 1.3  |
| NM_011186    | <i>Psmb5</i>    | BXD100 | NS       | NS   | 3.09E-02 | -1.4 |
| NM_008950    | <i>Psmc5</i>    | BXD100 | NS       | NS   | 2.70E-02 | -1.4 |
| NM_025550    | <i>Psmc6</i>    | BXD100 | NS       | NS   | 2.21E-02 | -1.4 |
| NM_025682    | <i>Pspc1</i>    | BXD100 | 3.49E-02 | -1.5 | NS       | NS   |
| NM_133783    | <i>Ptges2</i>   | BXD100 | NS       | NS   | 2.04E-02 | -1.6 |
| NM_001109992 | <i>Ptpn11</i>   | BXD100 | 1.00E-02 | 1.3  | NS       | NS   |
| NM_001163565 | <i>Ptpn5</i>    | BXD100 | NS       | NS   | 2.69E-02 | -1.3 |
| NM_025831    | <i>Pxdc1</i>    | BXD100 | 3.32E-02 | 1.5  | NS       | NS   |
| NM_145458    | <i>Pxk</i>      | BXD100 | 1.15E-02 | 1.3  | NS       | NS   |
| NM_029494    | <i>Rab30</i>    | BXD100 | 1.75E-06 | 1.9  | 1.59E-07 | 2.0  |
| NM_029781    | <i>Rab36</i>    | BXD100 | 6.91E-03 | 1.5  | NS       | NS   |
| NM_175122    | <i>Rab39b</i>   | BXD100 | 4.37E-02 | 1.3  | NS       | NS   |

|              |                 |        |          |      |          |      |
|--------------|-----------------|--------|----------|------|----------|------|
| NM_001038621 | <i>Rabgap1l</i> | BXD100 | 2.86E-03 | 1.4  | 1.79E-04 | 1.5  |
| NM_001099624 | <i>Rapgef2</i>  | BXD100 | 1.01E-08 | 1.8  | 1.30E-08 | 1.8  |
| NM_001252494 | <i>Rapgef6</i>  | BXD100 | 9.78E-09 | 2.3  | 7.65E-07 | 2.1  |
| NM_001176528 | <i>Rara</i>     | BXD100 | 1.34E-04 | -1.8 | NS       | NS   |
| NM_009025    | <i>Rasa3</i>    | BXD100 | 2.47E-02 | -1.5 | 1.06E-03 | -1.7 |
| NM_011246    | <i>Rasgrp1</i>  | BXD100 | 1.54E-02 | -1.5 | NS       | NS   |
| NM_009029    | <i>Rb1</i>      | BXD100 | 2.21E-02 | -1.3 | NS       | NS   |
| NM_028234    | <i>Rbm33</i>    | BXD100 | 2.46E-03 | 1.5  | 3.81E-02 | 1.4  |
| NM_001039080 | <i>Rbms2</i>    | BXD100 | 3.15E-02 | 1.7  | NS       | NS   |
| NM_001081549 | <i>Rcan1</i>    | BXD100 | 3.43E-03 | 1.5  | 3.71E-02 | 1.4  |
| NM_001286653 | <i>Rcan2</i>    | BXD100 | 1.76E-02 | 1.4  | NS       | NS   |
| NM_009037    | <i>Rcn1</i>     | BXD100 | 2.56E-02 | 1.4  | NS       | NS   |
| NM_026446    | <i>Rgs19</i>    | BXD100 | 5.69E-03 | -1.7 | NS       | NS   |
| NM_009062    | <i>Rgs4</i>     | BXD100 | 3.06E-03 | 1.6  | 9.73E-03 | 1.6  |
| NM_007483    | <i>Rhob</i>     | BXD100 | 1.09E-02 | 1.4  | NS       | NS   |
| NM_153514    | <i>Rhobtb2</i>  | BXD100 | 1.78E-02 | -1.5 | 2.12E-02 | -1.5 |
| NM_024288    | <i>Rmnd5a</i>   | BXD100 | NS       | NS   | 3.67E-02 | 1.3  |
| NM_011882    | <i>Rnasel</i>   | BXD100 | NS       | NS   | 6.99E-03 | 1.7  |
| NM_026301    | <i>Rnf125</i>   | BXD100 | 2.00E-02 | 1.8  | NS       | NS   |
| NM_025999    | <i>Rnf141</i>   | BXD100 | NS       | NS   | 4.82E-02 | 1.3  |
| NM_001166553 | <i>Rnf145</i>   | BXD100 | 6.94E-05 | -1.6 | 8.30E-05 | -1.6 |
| NM_001160368 | <i>Rnf152</i>   | BXD100 | 1.32E-02 | 1.6  | NS       | NS   |
| NM_175388    | <i>Rnf169</i>   | BXD100 | 1.39E-02 | 1.5  | NS       | NS   |
| NM_028783    | <i>Robo4</i>    | BXD100 | 1.96E-02 | 1.6  | NS       | NS   |
| NM_001042556 | <i>Rpf2</i>     | BXD100 | NS       | NS   | 2.11E-02 | -1.4 |
| NM_133982    | <i>Rpp25</i>    | BXD100 | NS       | NS   | 2.08E-03 | -1.8 |
| NM_146244    | <i>Rps6kl1</i>  | BXD100 | 2.81E-02 | 1.6  | 3.81E-04 | 1.9  |
| NM_199447    | <i>Rrp12</i>    | BXD100 | 1.63E-02 | -1.7 | 4.25E-02 | -1.7 |
| NM_001081174 | <i>Rsg1</i>     | BXD100 | 9.04E-03 | 2.0  | NS       | NS   |
| NM_001136227 | <i>Rtkn</i>     | BXD100 | NS       | NS   | 4.07E-02 | 1.5  |
| NM_130892    | <i>Rtn4ip1</i>  | BXD100 | NS       | NS   | 4.40E-02 | -1.5 |
| NM_007901    | <i>S1pr1</i>    | BXD100 | 8.29E-03 | 1.7  | NS       | NS   |
| NM_016926    | <i>Sart3</i>    | BXD100 | 3.30E-02 | -1.5 | NS       | NS   |
| NM_175155    | <i>Sash1</i>    | BXD100 | 4.46E-02 | 1.4  | NS       | NS   |
| NM_172769    | <i>Sc5d</i>     | BXD100 | NS       | NS   | 1.99E-02 | -1.3 |
| NM_009127    | <i>Scd1</i>     | BXD100 | 9.02E-03 | -1.5 | NS       | NS   |
| NM_011324    | <i>Scnn1a</i>   | BXD100 | 4.87E-02 | 1.8  | NS       | NS   |
| NM_027268    | <i>Scrn1</i>    | BXD100 | 3.83E-02 | -1.2 | NS       | NS   |

|              |                 |        |          |      |          |      |
|--------------|-----------------|--------|----------|------|----------|------|
| NM_011521    | <i>Sdc4</i>     | BXD100 | 2.15E-06 | 2.9  | 1.80E-05 | 2.7  |
| NM_024206    | <i>Sec13</i>    | BXD100 | NS       | NS   | 3.09E-02 | -1.5 |
| NM_011342    | <i>Sec22b</i>   | BXD100 | 4.50E-02 | 1.3  | NS       | NS   |
| NM_172588    | <i>Serinc5</i>  | BXD100 | NS       | NS   | 2.65E-02 | 1.5  |
| NM_001013370 | <i>Sesn1</i>    | BXD100 | 5.24E-03 | 1.6  | NS       | NS   |
| NM_030261    | <i>Sesn3</i>    | BXD100 | 1.80E-06 | 1.7  | 1.15E-02 | 1.4  |
| NM_001040398 | <i>Setd1b</i>   | BXD100 | 1.28E-02 | -1.6 | NS       | NS   |
| NM_001168525 | <i>Sgms1</i>    | BXD100 | 7.08E-04 | 2.2  | 4.40E-02 | 1.8  |
| NM_009167    | <i>Shc3</i>     | BXD100 | 2.21E-02 | -1.3 | 1.47E-02 | -1.3 |
| NM_001168505 | <i>Shoc2</i>    | BXD100 | NS       | NS   | 3.81E-02 | -1.2 |
| NM_001286538 | <i>Sigmar1</i>  | BXD100 | 8.85E-03 | -1.5 | 1.15E-03 | -1.6 |
| NM_013612    | <i>Slc11a1</i>  | BXD100 | NS       | NS   | 2.03E-02 | 1.8  |
| NM_027921    | <i>Slc16a14</i> | BXD100 | 4.96E-03 | 1.6  | NS       | NS   |
| NM_001029842 | <i>Slc16a6</i>  | BXD100 | 2.75E-02 | 1.9  | NS       | NS   |
| NM_001159593 | <i>Slc20a1</i>  | BXD100 | 5.96E-03 | -1.4 | 1.24E-02 | -1.4 |
| NM_138756    | <i>Slc25a36</i> | BXD100 | NS       | NS   | 2.21E-02 | 1.4  |
| NM_001009949 | <i>Slc25a51</i> | BXD100 | 2.83E-02 | 1.4  | NS       | NS   |
| NM_011977    | <i>Slc27a1</i>  | BXD100 | 1.42E-02 | 1.4  | NS       | NS   |
| NM_007854    | <i>Slc29a2</i>  | BXD100 | NS       | NS   | 2.21E-02 | -1.7 |
| NM_023596    | <i>Slc29a3</i>  | BXD100 | 6.27E-03 | 1.5  | 8.91E-03 | 1.5  |
| NM_011400    | <i>Slc2a1</i>   | BXD100 | 1.10E-06 | 2.4  | 4.63E-03 | 1.8  |
| NM_175121    | <i>Slc38a2</i>  | BXD100 | 3.70E-02 | 1.3  | NS       | NS   |
| NM_001012305 | <i>Slc39a12</i> | BXD100 | 9.04E-03 | 1.7  | 4.07E-02 | 1.5  |
| NM_026244    | <i>Slc39a9</i>  | BXD100 | 2.29E-02 | 1.3  | NS       | NS   |
| NM_001199283 | <i>Slc43a2</i>  | BXD100 | 1.53E-04 | 1.8  | 2.94E-03 | 1.6  |
| NM_001081263 | <i>Slc44a5</i>  | BXD100 | 2.87E-06 | 1.9  | 1.65E-08 | 2.2  |
| NM_029643    | <i>Slc52a2</i>  | BXD100 | 4.66E-02 | -1.5 | 3.50E-02 | -1.5 |
| NM_001164819 | <i>Slc52a3</i>  | BXD100 | NS       | NS   | 1.95E-02 | 1.7  |
| NM_007515    | <i>Slc7a3</i>   | BXD100 | 2.22E-02 | 1.6  | NS       | NS   |
| NM_012030    | <i>Slc9a3r1</i> | BXD100 | 3.69E-02 | -1.4 | NS       | NS   |
| NM_177909    | <i>Slc9a9</i>   | BXD100 | 2.99E-02 | 1.5  | NS       | NS   |
| NM_001038643 | <i>Slco3a1</i>  | BXD100 | 2.59E-03 | -1.5 | 2.38E-03 | -1.5 |
| NM_008539    | <i>Smad1</i>    | BXD100 | 9.10E-05 | 1.6  | NS       | NS   |
| NM_001252481 | <i>Smad2</i>    | BXD100 | 4.87E-03 | -1.5 | 1.85E-02 | -1.5 |
| NM_031842    | <i>Smarcd1</i>  | BXD100 | NS       | NS   | 4.07E-02 | -1.3 |
| NM_134133    | <i>Smim3</i>    | BXD100 | NS       | NS   | 3.20E-02 | 1.9  |
| NM_026796    | <i>Smyd2</i>    | BXD100 | NS       | NS   | 3.37E-03 | -1.5 |
| NM_009226    | <i>Snrpd1</i>   | BXD100 | NS       | NS   | 1.30E-02 | -1.5 |

|              |                 |        |          |      |          |      |
|--------------|-----------------|--------|----------|------|----------|------|
| NM_026095    | <i>Snrpd3</i>   | BXD100 | 3.72E-02 | -1.3 | NS       | NS   |
| NM_001190156 | <i>Snx7</i>     | BXD100 | 3.41E-02 | -1.4 | NS       | NS   |
| NM_001034962 | <i>Sorbs1</i>   | BXD100 | 4.84E-03 | 1.4  | 1.82E-03 | 1.4  |
| NM_146126    | <i>Sord</i>     | BXD100 | 1.38E-03 | 1.8  | NS       | NS   |
| NM_001289464 | <i>Sox17</i>    | BXD100 | NS       | NS   | 2.35E-02 | 1.7  |
| NM_009236    | <i>Sox18</i>    | BXD100 | NS       | NS   | 2.87E-02 | 1.9  |
| NM_001025428 | <i>Spag9</i>    | BXD100 | 6.92E-04 | 1.5  | 1.80E-03 | 1.4  |
| NM_182927    | <i>Spred3</i>   | BXD100 | 4.54E-04 | -2.2 | 2.86E-04 | -2.3 |
| NM_011898    | <i>Spry4</i>    | BXD100 | 1.47E-04 | -2.1 | 2.08E-03 | -1.9 |
| NM_009270    | <i>Sqle</i>     | BXD100 | 1.14E-03 | -1.6 | 4.09E-06 | -1.8 |
| NM_033218    | <i>Srebf2</i>   | BXD100 | NS       | NS   | 1.84E-02 | -1.3 |
| NM_009272    | <i>Srm</i>      | BXD100 | 1.80E-03 | -1.5 | 1.03E-03 | -1.5 |
| NM_016795    | <i>Srpkl</i>    | BXD100 | 7.59E-05 | -1.7 | 2.35E-02 | -1.4 |
| NM_001080387 | <i>Srsf10</i>   | BXD100 | 3.41E-02 | -1.4 | NS       | NS   |
| NM_011358    | <i>Srsf2</i>    | BXD100 | 4.72E-03 | -1.5 | 2.87E-02 | -1.4 |
| NM_001195485 | <i>Srsf7</i>    | BXD100 | 2.21E-02 | -1.6 | 1.99E-02 | -1.6 |
| NM_001252505 | <i>St6gal1</i>  | BXD100 | 3.75E-02 | 1.5  | NS       | NS   |
| NM_013666    | <i>St8sia5</i>  | BXD100 | NS       | NS   | 4.07E-02 | -1.6 |
| NM_133774    | <i>Stard4</i>   | BXD100 | 1.08E-04 | -2.0 | 6.48E-05 | -2.1 |
| NM_019675    | <i>Stmn4</i>    | BXD100 | NS       | NS   | 3.32E-02 | 1.5  |
| NM_013515    | <i>Stom</i>     | BXD100 | 2.85E-02 | 1.9  | 3.71E-02 | 1.9  |
| NM_153563    | <i>Strip1</i>   | BXD100 | 1.53E-04 | -1.5 | 1.06E-03 | -1.4 |
| NM_011505    | <i>Stxbp4</i>   | BXD100 | 7.67E-03 | 1.6  | 4.88E-02 | 1.5  |
| NM_133670    | <i>Sult1a1</i>  | BXD100 | 3.53E-03 | 2.8  | 2.04E-02 | 2.4  |
| NM_001164495 | <i>Syn3</i>     | BXD100 | 1.48E-02 | 1.4  | 3.19E-02 | 1.4  |
| NM_153399    | <i>Syne1</i>    | BXD100 | NS       | NS   | 2.45E-02 | 1.5  |
| NM_001005510 | <i>Syne2</i>    | BXD100 | 1.41E-02 | 1.5  | NS       | NS   |
| NM_001040085 | <i>Sytl2</i>    | BXD100 | 6.02E-03 | 1.8  | 2.22E-04 | 2.2  |
| NM_020024    | <i>Taf10</i>    | BXD100 | NS       | NS   | 2.39E-02 | -1.3 |
| NM_001177798 | <i>Taf6l</i>    | BXD100 | NS       | NS   | 2.39E-02 | -1.7 |
| NM_181275    | <i>Tas2r139</i> | BXD100 | 3.41E-02 | 1.7  | NS       | NS   |
| NM_146008    | <i>Tcp11l2</i>  | BXD100 | 3.29E-02 | 1.6  | NS       | NS   |
| NM_009368    | <i>Tgfb3</i>    | BXD100 | 3.41E-02 | 2.0  | NS       | NS   |
| NM_009381    | <i>Thrsp</i>    | BXD100 | 3.09E-02 | 1.6  | NS       | NS   |
| NM_144543    | <i>Thyn1</i>    | BXD100 | NS       | NS   | 4.50E-02 | -1.4 |
| NM_026708    | <i>Tlcl1</i>    | BXD100 | NS       | NS   | 3.44E-02 | -1.4 |
| NM_133211    | <i>Tlr7</i>     | BXD100 | NS       | NS   | 1.95E-02 | 1.9  |
| NM_177412    | <i>Tmcc1</i>    | BXD100 | NS       | NS   | 2.43E-02 | 1.4  |

|              |                 |        |          |      |          |      |
|--------------|-----------------|--------|----------|------|----------|------|
| NM_172541    | <i>Tmem120a</i> | BXD100 | 4.46E-03 | -1.7 | NS       | NS   |
| NM_177344    | <i>Tmem203</i>  | BXD100 | NS       | NS   | 1.99E-02 | -1.7 |
| NM_183160    | <i>Tmem252</i>  | BXD100 | 4.46E-02 | 1.7  | NS       | NS   |
| NM_001289727 | <i>Tmem255a</i> | BXD100 | 2.99E-02 | 2.1  | NS       | NS   |
| NM_001081283 | <i>Tmem28</i>   | BXD100 | NS       | NS   | 4.17E-02 | -1.6 |
| NM_177861    | <i>Tmem67</i>   | BXD100 | 6.90E-03 | 1.7  | NS       | NS   |
| NM_021793    | <i>Tmem8</i>    | BXD100 | 4.36E-02 | 1.7  | NS       | NS   |
| NM_133706    | <i>Tmem97</i>   | BXD100 | NS       | NS   | 2.01E-02 | -1.7 |
| NM_011607    | <i>Tnc</i>      | BXD100 | 9.63E-03 | -1.6 | NS       | NS   |
| NM_001048267 | <i>Tnpo1</i>    | BXD100 | 1.17E-04 | 1.6  | 1.79E-04 | 1.6  |
| NM_144812    | <i>Tnrc6b</i>   | BXD100 | 2.76E-02 | 1.5  | 2.47E-03 | 1.6  |
| NM_001109748 | <i>Tomm40</i>   | BXD100 | 5.91E-05 | -1.6 | NS       | NS   |
| NM_001170488 | <i>Tprkb</i>    | BXD100 | 3.29E-02 | 1.5  | NS       | NS   |
| NM_029979    | <i>Trim35</i>   | BXD100 | NS       | NS   | 4.17E-02 | -1.4 |
| NM_001170855 | <i>Trim36</i>   | BXD100 | NS       | NS   | 1.07E-02 | -2.1 |
| NM_178110    | <i>Trim62</i>   | BXD100 | 1.45E-02 | -1.5 | NS       | NS   |
| NM_001167994 | <i>Trmt2b</i>   | BXD100 | 2.81E-02 | 1.7  | NS       | NS   |
| NM_001099792 | <i>Trmt61a</i>  | BXD100 | 3.06E-03 | -1.7 | NS       | NS   |
| NM_013735    | <i>Trp53bp1</i> | BXD100 | NS       | NS   | 2.76E-02 | -1.4 |
| NM_173378    | <i>Trp53bp2</i> | BXD100 | 1.84E-02 | 1.6  | NS       | NS   |
| NM_001282086 | <i>Trpc6</i>    | BXD100 | 2.85E-02 | -1.7 | NS       | NS   |
| NM_032000    | <i>Trps1</i>    | BXD100 | NS       | NS   | 4.13E-02 | 1.4  |
| NM_001177751 | <i>Tsc22d1</i>  | BXD100 | 2.21E-02 | 1.2  | NS       | NS   |
| NM_001077364 | <i>Tsc22d3</i>  | BXD100 | 7.23E-03 | 1.8  | NS       | NS   |
| NM_183099    | <i>Tssk5</i>    | BXD100 | 3.83E-02 | 1.4  | NS       | NS   |
| NM_146116    | <i>Tubb4b</i>   | BXD100 | NS       | NS   | 4.34E-03 | -1.4 |
| NM_023053    | <i>Twsg1</i>    | BXD100 | 3.06E-02 | 1.4  | NS       | NS   |
| NM_001009935 | <i>Txnip</i>    | BXD100 | 8.40E-10 | 5.5  | 1.30E-08 | 4.9  |
| NM_176860    | <i>Ubash3b</i>  | BXD100 | 3.90E-03 | -1.7 | NS       | NS   |
| NM_001169576 | <i>Ube2h</i>    | BXD100 | 1.81E-04 | 1.6  | 1.95E-05 | 1.7  |
| NM_016723    | <i>Uchl3</i>    | BXD100 | 4.36E-02 | -1.4 | NS       | NS   |
| NM_030724    | <i>Uck2</i>     | BXD100 | 1.59E-02 | -1.3 | 4.49E-02 | -1.3 |
| NM_001081132 | <i>Upf2</i>     | BXD100 | 3.55E-03 | 1.7  | 9.96E-03 | 1.6  |
| NM_009462    | <i>Usp10</i>    | BXD100 | 1.45E-02 | -1.3 | 2.38E-02 | -1.3 |
| NM_030180    | <i>Usp54</i>    | BXD100 | 3.96E-02 | 1.6  | 3.03E-03 | 1.8  |
| NM_001013375 | <i>Utp18</i>    | BXD100 | 2.21E-02 | -1.4 | NS       | NS   |
| NM_175158    | <i>Utp20</i>    | BXD100 | NS       | NS   | 1.22E-02 | -1.7 |
| NM_001039385 | <i>Vgf</i>      | BXD100 | 2.10E-03 | -2.2 | 2.17E-03 | -2.2 |

|              |                      |        |          |      |          |      |
|--------------|----------------------|--------|----------|------|----------|------|
| NM_145967    | <i>Vstm2a</i>        | BXD100 | NS       | NS   | 2.20E-03 | -1.4 |
| NM_001172152 | <i>Wdr17</i>         | BXD100 | NS       | NS   | 3.60E-02 | -1.4 |
| NM_175450    | <i>Wdr18</i>         | BXD100 | NS       | NS   | 4.01E-02 | -1.5 |
| NM_020603    | <i>Wdr46</i>         | BXD100 | 1.94E-02 | -1.7 | 1.97E-02 | -1.7 |
| NM_134139    | <i>Wdr74</i>         | BXD100 | NS       | NS   | 4.06E-02 | -1.4 |
| NM_009516    | <i>Wee1</i>          | BXD100 | NS       | NS   | 3.61E-02 | -1.4 |
| NM_023395    | <i>Wfdc1</i>         | BXD100 | NS       | NS   | 2.11E-02 | 1.8  |
| NM_011273    | <i>Xpr1</i>          | BXD100 | 2.45E-02 | 1.3  | NS       | NS   |
| NM_001005341 | <i>Ypel2</i>         | BXD100 | 3.13E-02 | 1.8  | NS       | NS   |
| NM_025347    | <i>Ypel3</i>         | BXD100 | 4.42E-02 | 1.3  | NS       | NS   |
| NM_001005342 | <i>Ypel4</i>         | BXD100 | 2.77E-06 | 3.1  | 1.11E-05 | 2.9  |
| NM_027166    | <i>Ypel5</i>         | BXD100 | 1.75E-06 | 1.7  | 8.85E-05 | 1.6  |
| NM_001163013 | <i>Ythdc2</i>        | BXD100 | 5.12E-03 | -1.7 | NS       | NS   |
| NM_028106    | <i>Zbed3</i>         | BXD100 | 3.55E-03 | 1.6  | NS       | NS   |
| NM_173181    | <i>Zc2hc1a</i>       | BXD100 | NS       | NS   | 2.57E-02 | -1.4 |
| NM_028325    | <i>Zcchc12</i>       | BXD100 | 2.67E-02 | 1.9  | NS       | NS   |
| NM_001113399 | <i>Zfp385b</i>       | BXD100 | 4.00E-02 | 1.4  | NS       | NS   |
| NM_001110309 | <i>Zfp426</i>        | BXD100 | 2.12E-03 | 1.6  | 6.60E-03 | 1.5  |
| NM_175513    | <i>Zfp804a</i>       | BXD100 | 6.53E-03 | -1.4 | NS       | NS   |
| NM_001267583 | <i>Zfp811</i>        | BXD100 | NS       | NS   | 4.32E-03 | 1.6  |
| NM_001105557 | <i>Zfp938</i>        | BXD100 | 4.55E-02 | 1.3  | 4.92E-02 | 1.3  |
| NM_172738    | <i>Zfp954</i>        | BXD100 | 1.25E-02 | 1.6  | NS       | NS   |
| NM_183154    | <i>Zfyve1</i>        | BXD100 | 3.84E-02 | 1.4  | NS       | NS   |
| NM_001252584 | <i>Zmynd8</i>        | BXD100 | NS       | NS   | 2.03E-03 | 1.7  |
| NM_001205367 | <i>-44446</i>        | BXD60  | 8.80E-03 | -1.3 | NS       | NS   |
| NM_021446    | <i>0610007P14Rik</i> | BXD60  | NS       | NS   | 3.71E-02 | -1.3 |
| NM_001083880 | <i>1600012H06Rik</i> | BXD60  | 1.54E-02 | 1.5  | NS       | NS   |
| NM_028820    | <i>1700017B05Rik</i> | BXD60  | 1.92E-02 | 1.4  | NS       | NS   |
| NM_144953    | <i>1700019D03Rik</i> | BXD60  | NS       | NS   | 4.53E-02 | 1.6  |
| NR_045177    | <i>2900055J20Rik</i> | BXD60  | 2.14E-03 | 1.7  | NS       | NS   |
| NM_027017    | <i>3300002I08Rik</i> | BXD60  | 1.09E-02 | 1.6  | NS       | NS   |
| NM_001033273 | <i>5031439G07Rik</i> | BXD60  | 4.54E-04 | 1.4  | 3.14E-02 | 1.3  |
| NM_001033304 | <i>5330417C22Rik</i> | BXD60  | 8.26E-03 | 1.6  | NS       | NS   |
| NM_027472    | <i>5730455P16Rik</i> | BXD60  | 6.84E-04 | 1.6  | NS       | NS   |
| NM_029964    | <i>6030468B19Rik</i> | BXD60  | 9.80E-03 | -1.7 | NS       | NS   |
| NM_001123370 | <i>9030025P20Rik</i> | BXD60  | 1.16E-02 | 1.5  | NS       | NS   |
| NM_001142969 | <i>A630073D07Rik</i> | BXD60  | 1.77E-02 | 2.6  | NS       | NS   |
| NM_001167925 | <i>A730017C20Rik</i> | BXD60  | 3.93E-05 | 1.4  | 1.67E-02 | 1.2  |

|              |                      |       |          |      |          |      |
|--------------|----------------------|-------|----------|------|----------|------|
| NR_015488    | <i>A930003A15Rik</i> | BXD60 | 4.58E-02 | 1.7  | 1.52E-07 | 3.2  |
| NR_033609    | <i>A930017M01Rik</i> | BXD60 | 3.98E-05 | 2.1  | 1.20E-03 | 1.9  |
| NM_001033336 | <i>Abcc4</i>         | BXD60 | 3.00E-02 | 1.7  | NS       | NS   |
| NM_008991    | <i>Abcd3</i>         | BXD60 | 3.92E-02 | -1.3 | NS       | NS   |
| NM_009593    | <i>Abcg1</i>         | BXD60 | 1.35E-02 | 1.8  | NS       | NS   |
| NM_001110271 | <i>Abhd14a</i>       | BXD60 | 1.62E-02 | 1.6  | NS       | NS   |
| NM_134130    | <i>Abhd3</i>         | BXD60 | 1.41E-02 | 1.7  | NS       | NS   |
| NM_025341    | <i>Abhd6</i>         | BXD60 | 2.73E-02 | 1.4  | NS       | NS   |
| NM_025826    | <i>Acadsb</i>        | BXD60 | NS       | NS   | 4.06E-03 | 1.7  |
| NM_009338    | <i>Acat2</i>         | BXD60 | 2.21E-02 | -1.4 | NS       | NS   |
| NM_153151    | <i>Acat3</i>         | BXD60 | 4.05E-02 | -1.4 | NS       | NS   |
| NM_139306    | <i>Acer2</i>         | BXD60 | 2.08E-02 | 2.0  | NS       | NS   |
| NM_001199296 | <i>Acly</i>          | BXD60 | 4.85E-02 | -1.3 | NS       | NS   |
| NM_001270996 | <i>Adam9</i>         | BXD60 | 1.47E-03 | 1.4  | NS       | NS   |
| NM_001163290 | <i>Adck3</i>         | BXD60 | 1.66E-02 | 1.7  | NS       | NS   |
| NM_001025372 | <i>Adcyap1r1</i>     | BXD60 | 1.50E-03 | 1.5  | NS       | NS   |
| NM_054053    | <i>Adgrv1</i>        | BXD60 | 1.43E-02 | 2.0  | NS       | NS   |
| NM_001289656 | <i>Agbl3</i>         | BXD60 | 3.07E-02 | 1.5  | NS       | NS   |
| NM_178162    | <i>Agfg2</i>         | BXD60 | 5.75E-03 | -1.8 | 7.21E-03 | -1.8 |
| NM_153177    | <i>Ago4</i>          | BXD60 | 4.25E-02 | 1.6  | NS       | NS   |
| NM_026644    | <i>Agpat4</i>        | BXD60 | 1.97E-02 | 1.3  | 1.27E-02 | 1.4  |
| uc008hme.1   | <i>AI606181</i>      | BXD60 | 2.68E-03 | 1.9  | NS       | NS   |
| NM_001172146 | <i>Aimp2</i>         | BXD60 | 1.06E-03 | -1.9 | NS       | NS   |
| NM_001035532 | <i>Akap2</i>         | BXD60 | 1.04E-03 | 1.6  | NS       | NS   |
| NM_017476    | <i>Akap8l</i>        | BXD60 | 7.57E-04 | 1.5  | NS       | NS   |
| NM_019698    | <i>Aldh18a1</i>      | BXD60 | 3.25E-02 | 1.7  | NS       | NS   |
| NM_009657    | <i>Aldoc</i>         | BXD60 | 2.28E-03 | 1.4  | NS       | NS   |
| NM_025538    | <i>Alkbh7</i>        | BXD60 | NS       | NS   | 2.38E-02 | -1.5 |
| NM_001159948 | <i>Als2</i>          | BXD60 | 4.93E-02 | 1.4  | NS       | NS   |
| NM_001276301 | <i>Ampd3</i>         | BXD60 | 8.24E-04 | 1.9  | NS       | NS   |
| NM_001190371 | <i>Ankrd29</i>       | BXD60 | 3.95E-03 | 1.6  | NS       | NS   |
| NM_001024851 | <i>Ankrd34a</i>      | BXD60 | 1.46E-02 | -1.8 | NS       | NS   |
| ENSMUST0000  |                      |       |          |      |          | NS   |
| 0105593      | <i>Ankrd65</i>       | BXD60 | 4.39E-02 | -1.6 | NS       |      |
| NM_001128103 | <i>Ano3</i>          | BXD60 | 5.19E-03 | 2.0  | NS       | NS   |
| NM_001253813 | <i>Ano6</i>          | BXD60 | 3.69E-02 | 1.4  | NS       | NS   |
| NM_007460    | <i>Ap3d1</i>         | BXD60 | 1.74E-02 | -1.2 | NS       | NS   |
| NM_011789    | <i>Apc2</i>          | BXD60 | 3.87E-02 | 1.5  | NS       | NS   |



|              |                 |       |          |      |          |      |
|--------------|-----------------|-------|----------|------|----------|------|
| NM_026674    | <i>Aph1c</i>    | BXD60 | 4.91E-02 | 1.4  | NS       | NS   |
| NM_001109914 | <i>Apold1</i>   | BXD60 | 5.95E-03 | 1.9  | 9.96E-03 | 1.9  |
| NM_175105    | <i>Aqp11</i>    | BXD60 | 2.70E-04 | 1.7  | NS       | NS   |
| NM_009705    | <i>Arg2</i>     | BXD60 | 2.78E-02 | 1.7  | NS       | NS   |
| NM_001172205 | <i>Arid5a</i>   | BXD60 | 7.11E-07 | 3.1  | 2.86E-03 | 2.2  |
| NM_023598    | <i>Arid5b</i>   | BXD60 | 5.94E-04 | 1.7  | 1.29E-03 | 1.7  |
| NM_172595    | <i>Arl15</i>    | BXD60 | 4.79E-02 | 1.5  | NS       | NS   |
| NM_027870    | <i>Armxc3</i>   | BXD60 | 6.62E-03 | 1.4  | NS       | NS   |
| NM_007488    | <i>Arnt2</i>    | BXD60 | 1.26E-02 | -1.4 | NS       | NS   |
| NM_001289679 | <i>Arntl2</i>   | BXD60 | 1.55E-03 | 2.4  | NS       | NS   |
| NM_001042591 | <i>Arrdc3</i>   | BXD60 | 4.01E-13 | 4.1  | 7.09E-07 | 2.6  |
| NM_001042592 | <i>Arrdc4</i>   | BXD60 | 5.90E-04 | 1.9  | 2.51E-02 | 1.7  |
| NM_007492    | <i>Arx</i>      | BXD60 | NS       | NS   | 8.49E-03 | -1.8 |
| NM_001276461 | <i>Asap1</i>    | BXD60 | 3.08E-02 | -1.3 | NS       | NS   |
| NM_001029895 | <i>Ate1</i>     | BXD60 | NS       | NS   | 3.18E-02 | -1.3 |
| NM_001287180 | <i>Atf4</i>     | BXD60 | 1.64E-03 | -1.6 | 2.04E-02 | -1.5 |
| NM_001081304 | <i>Atf6</i>     | BXD60 | 5.08E-03 | 1.4  | NS       | NS   |
| NM_019426    | <i>Atf7ip</i>   | BXD60 | NS       | NS   | 3.68E-02 | 1.5  |
| NM_026217    | <i>Atg12</i>    | BXD60 | 6.84E-04 | 1.4  | 2.02E-02 | 1.3  |
| NM_026402    | <i>Atg3</i>     | BXD60 | 3.49E-02 | -1.3 | NS       | NS   |
| NM_001145967 | <i>Atg4c</i>    | BXD60 | 2.28E-02 | 1.5  | NS       | NS   |
| NM_007881    | <i>Atn1</i>     | BXD60 | 4.17E-02 | -1.3 | NS       | NS   |
| NM_001243049 | <i>Atp6v0a1</i> | BXD60 | 1.56E-02 | 1.3  | NS       | NS   |
| NM_025272    | <i>Atp6v0e</i>  | BXD60 | 5.54E-04 | 2.1  | NS       | NS   |
| NM_027855    | <i>Atraid</i>   | BXD60 | 8.20E-04 | 1.5  | 4.67E-02 | 1.4  |
| NM_009125    | <i>Atxn2</i>    | BXD60 | 7.56E-04 | -1.4 | 1.63E-02 | -1.3 |
| NM_016847    | <i>Avpr1a</i>   | BXD60 | 3.68E-02 | -1.6 | NS       | NS   |
| NM_001104646 | <i>AW209491</i> | BXD60 | 1.19E-02 | 1.5  | NS       | NS   |
| NM_001122993 | <i>B3galt5</i>  | BXD60 | 5.12E-06 | 2.2  | NS       | NS   |
| NM_001159407 | <i>B3gnt5</i>   | BXD60 | 6.87E-03 | 1.6  | 1.69E-02 | 1.6  |
| NM_145222    | <i>B3gnt7</i>   | BXD60 | 3.49E-02 | -1.5 | NS       | NS   |
| NM_007519    | <i>Baat</i>     | BXD60 | 4.36E-02 | 1.6  | NS       | NS   |
| NM_013863    | <i>Bag3</i>     | BXD60 | 3.75E-02 | 1.6  | NS       | NS   |
| NM_027404    | <i>Bag5</i>     | BXD60 | 1.05E-02 | -1.5 | NS       | NS   |
| NM_175325    | <i>Bbs4</i>     | BXD60 | 5.95E-03 | 1.3  | 1.30E-02 | 1.4  |
| NM_027444    | <i>Bbx</i>      | BXD60 | 3.10E-03 | 1.8  | NS       | NS   |
| NM_001001332 | <i>BC117090</i> | BXD60 | 4.96E-02 | -1.8 | NS       | NS   |
| NM_001024468 | <i>Bcat1</i>    | BXD60 | 2.22E-06 | 1.7  | NS       | NS   |

|              |                 |       |          |      |          |      |
|--------------|-----------------|-------|----------|------|----------|------|
| NM_001284410 | <i>Bcl2l11</i>  | BXD60 | 5.60E-06 | 2.7  | 6.07E-07 | 3.0  |
| NM_001277216 | <i>Bmpr1b</i>   | BXD60 | 5.93E-03 | 1.8  | 2.77E-02 | 1.7  |
| NM_026396    | <i>Brix1</i>    | BXD60 | 3.36E-02 | -1.4 | NS       | NS   |
| NM_001037756 | <i>Brms1l</i>   | BXD60 | 2.40E-02 | -1.4 | NS       | NS   |
| NM_133889    | <i>Bsdc1</i>    | BXD60 | 5.12E-06 | 1.6  | 4.24E-03 | 1.4  |
| NM_027060    | <i>Btbd9</i>    | BXD60 | 9.03E-05 | 1.6  | NS       | NS   |
| NM_007570    | <i>Btg2</i>     | BXD60 | 4.49E-05 | 2.1  | 1.39E-03 | 1.9  |
| NM_009770    | <i>Btg3</i>     | BXD60 | 6.02E-03 | 1.8  | 4.22E-03 | 1.9  |
| NM_016859    | <i>Bysl</i>     | BXD60 | NS       | NS   | 4.12E-02 | -1.6 |
| NM_001252533 | <i>Cacnb2</i>   | BXD60 | 5.62E-03 | 1.4  | NS       | NS   |
| NM_001199301 | <i>Cacng5</i>   | BXD60 | 2.29E-03 | 1.8  | NS       | NS   |
| NM_026192    | <i>Calcoco1</i> | BXD60 | 1.09E-03 | 1.6  | NS       | NS   |
| NM_133926    | <i>Camk1</i>    | BXD60 | 1.74E-02 | -1.6 | NS       | NS   |
| NM_144817    | <i>Camk1g</i>   | BXD60 | 2.41E-05 | -1.7 | 9.32E-04 | -1.6 |
| NM_009797    | <i>Capza1</i>   | BXD60 | 3.50E-02 | -1.4 | NS       | NS   |
| NM_001271353 | <i>Cbs</i>      | BXD60 | 2.81E-02 | 1.4  | NS       | NS   |
| NM_007625    | <i>Cbx4</i>     | BXD60 | NS       | NS   | 1.29E-02 | -1.4 |
| NM_026201    | <i>Ccar1</i>    | BXD60 | NS       | NS   | 4.84E-02 | -1.4 |
| NM_029779    | <i>Ccdc116</i>  | BXD60 | 8.25E-03 | -1.7 | NS       | NS   |
| NM_177716    | <i>Ccdc184</i>  | BXD60 | 3.10E-03 | -1.6 | NS       | NS   |
| NM_144820    | <i>Ccdc28a</i>  | BXD60 | 1.81E-02 | 1.8  | 4.97E-02 | 1.7  |
| NM_026009    | <i>Ccdc47</i>   | BXD60 | 2.99E-03 | 1.4  | NS       | NS   |
| NM_025602    | <i>Ccdc59</i>   | BXD60 | NS       | NS   | 3.14E-02 | -1.6 |
| NM_007631    | <i>Ccnd1</i>    | BXD60 | 1.40E-03 | -1.6 | 4.13E-04 | -1.7 |
| NM_009831    | <i>Ccng1</i>    | BXD60 | 1.30E-02 | 1.3  | NS       | NS   |
| NM_007635    | <i>Ccng2</i>    | BXD60 | 5.26E-04 | 1.7  | NS       | NS   |
| NM_025422    | <i>Cd302</i>    | BXD60 | 8.51E-04 | 1.9  | NS       | NS   |
| NM_001111060 | <i>Cd59a</i>    | BXD60 | 1.40E-02 | 2.0  | NS       | NS   |
| NM_001042605 | <i>Cd74</i>     | BXD60 | 7.93E-03 | 2.6  | NS       | NS   |
| NM_001289915 | <i>Cd83</i>     | BXD60 | 3.49E-02 | 1.6  | NS       | NS   |
| NM_177613    | <i>Cdc34</i>    | BXD60 | 2.79E-02 | -1.6 | NS       | NS   |
| NM_001161623 | <i>Cdc45</i>    | BXD60 | 4.66E-02 | 1.5  | NS       | NS   |
| NM_007661    | <i>Cdk11b</i>   | BXD60 | 1.13E-02 | -1.5 | NS       | NS   |
| NM_001109626 | <i>Cdk12</i>    | BXD60 | 9.09E-03 | 1.6  | NS       | NS   |
| NM_001168304 | <i>Cdk19</i>    | BXD60 | 3.61E-02 | 1.3  | 3.96E-03 | 1.5  |
| NM_016756    | <i>Cdk2</i>     | BXD60 | NS       | NS   | 4.29E-02 | -1.6 |
| NM_009874    | <i>Cdk7</i>     | BXD60 | 6.75E-04 | -1.7 | NS       | NS   |
| NM_021339    | <i>Cdon</i>     | BXD60 | 4.59E-02 | 1.6  | NS       | NS   |

|              |                 |       |          |      |          |      |
|--------------|-----------------|-------|----------|------|----------|------|
| NM_026014    | <i>Cdt1</i>     | BXD60 | NS       | NS   | 1.23E-02 | -1.8 |
| NM_001134426 | <i>Cdv3</i>     | BXD60 | 8.20E-04 | -1.4 | NS       | NS   |
| NM_001159364 | <i>Cep97</i>    | BXD60 | 4.66E-02 | 1.5  | NS       | NS   |
| NM_001081345 | <i>Chd2</i>     | BXD60 | 1.68E-03 | 1.5  | 2.62E-02 | 1.4  |
| NM_138585    | <i>Cherp</i>    | BXD60 | 3.00E-02 | -1.3 | NS       | NS   |
| NM_009767    | <i>Chic1</i>    | BXD60 | 5.65E-03 | 1.8  | NS       | NS   |
| NM_026885    | <i>Chmp2a</i>   | BXD60 | 4.89E-02 | 1.4  | NS       | NS   |
| NM_023215    | <i>Chtop</i>    | BXD60 | NS       | NS   | 1.51E-02 | -1.3 |
| NM_025296    | <i>Ciao1</i>    | BXD60 | 3.83E-02 | 1.5  | NS       | NS   |
| NM_001033302 | <i>Ciart</i>    | BXD60 | 6.96E-03 | -2.3 | 1.24E-02 | -2.3 |
| NM_025854    | <i>Cir1</i>     | BXD60 | NS       | NS   | 2.51E-02 | 1.4  |
| NM_001177770 | <i>Clcc1</i>    | BXD60 | 6.84E-04 | 1.9  | NS       | NS   |
| NM_007711    | <i>Clcn3</i>    | BXD60 | 2.35E-02 | 1.3  | NS       | NS   |
| NM_001243762 | <i>Clcn5</i>    | BXD60 | 9.20E-09 | 2.6  | 2.03E-03 | 1.8  |
| NM_009902    | <i>Cldn3</i>    | BXD60 | 6.76E-03 | 2.1  | NS       | NS   |
| NM_009191    | <i>Clpb</i>     | BXD60 | 4.59E-02 | 1.4  | NS       | NS   |
| NM_024217    | <i>Cmtm3</i>    | BXD60 | 1.90E-02 | 1.4  | NS       | NS   |
| NM_026066    | <i>Cmtm5</i>    | BXD60 | 2.40E-03 | 1.5  | NS       | NS   |
| NM_007725    | <i>Cnn2</i>     | BXD60 | 3.00E-02 | -1.6 | NS       | NS   |
| NM_033570    | <i>Cnnm4</i>    | BXD60 | 1.35E-03 | 2.0  | NS       | NS   |
| NM_026977    | <i>Cnppd1</i>   | BXD60 | 1.17E-03 | 1.6  | NS       | NS   |
| NM_178612    | <i>Cnpy4</i>    | BXD60 | 8.91E-03 | 1.5  | NS       | NS   |
| NM_001081653 | <i>Cntnap5c</i> | BXD60 | 4.97E-02 | 1.4  | NS       | NS   |
| NM_178599    | <i>Comm8</i>    | BXD60 | 4.91E-03 | 1.4  | NS       | NS   |
| NM_001039710 | <i>Coq10b</i>   | BXD60 | NS       | NS   | 3.52E-02 | -1.5 |
| NM_009898    | <i>Coro1a</i>   | BXD60 | NS       | NS   | 2.38E-02 | -1.7 |
| NM_001252525 | <i>Cpeb1</i>    | BXD60 | 3.14E-02 | 1.7  | NS       | NS   |
| NM_011957    | <i>Creb3l1</i>  | BXD60 | 4.90E-02 | -1.7 | NS       | NS   |
| NM_172728    | <i>Creb5</i>    | BXD60 | NS       | NS   | 3.84E-02 | 1.8  |
| NM_170597    | <i>Creg2</i>    | BXD60 | 4.82E-02 | 1.5  | NS       | NS   |
| NM_001110850 | <i>Crem</i>     | BXD60 | 2.14E-03 | 1.7  | 3.46E-05 | 2.1  |
| NM_007762    | <i>Crhr1</i>    | BXD60 | 3.92E-03 | -1.8 | NS       | NS   |
| NM_009963    | <i>Cry2</i>     | BXD60 | 2.13E-03 | 1.4  | NS       | NS   |
| NM_023565    | <i>Cse1l</i>    | BXD60 | 1.74E-02 | -1.3 | NS       | NS   |
| NM_026493    | <i>Cspp1</i>    | BXD60 | 2.40E-02 | -1.5 | NS       | NS   |
| NM_153409    | <i>Csrnp3</i>   | BXD60 | 3.98E-03 | 1.4  | NS       | NS   |
| NM_007791    | <i>Csrp1</i>    | BXD60 | 2.73E-02 | 1.6  | NS       | NS   |
| NM_016748    | <i>Ctps</i>     | BXD60 | 1.95E-02 | -1.5 | NS       | NS   |

|              |                  |       |          |      |          |      |
|--------------|------------------|-------|----------|------|----------|------|
| NM_009984    | <i>Ctsl</i>      | BXD60 | 3.50E-02 | 1.4  | NS       | NS   |
| NM_009994    | <i>Cyp1b1</i>    | BXD60 | 2.76E-02 | 2.0  | NS       | NS   |
| NM_028979    | <i>Cyp2j9</i>    | BXD60 | 7.31E-05 | 2.2  | 4.50E-02 | 1.6  |
| NM_134127    | <i>Cyp4f15</i>   | BXD60 | 1.95E-02 | 1.8  | NS       | NS   |
| NM_020010    | <i>Cyp51</i>     | BXD60 | 4.84E-03 | -1.4 | 2.70E-02 | -1.3 |
| NM_001033279 | <i>D17Wsu92e</i> | BXD60 | 6.61E-03 | 1.4  | NS       | NS   |
| NM_001008231 | <i>Daam2</i>     | BXD60 | 2.14E-02 | 1.5  | NS       | NS   |
| NM_172826    | <i>Dact2</i>     | BXD60 | 7.92E-04 | 1.9  | NS       | NS   |
| NM_198114    | <i>Dagla</i>     | BXD60 | 2.79E-02 | 1.5  | NS       | NS   |
| NM_001285917 | <i>Dapk1</i>     | BXD60 | 2.28E-02 | 1.3  | NS       | NS   |
| NM_011932    | <i>Dapp1</i>     | BXD60 | 2.20E-02 | 1.7  | NS       | NS   |
| NM_001195496 | <i>Dclk2</i>     | BXD60 | 1.29E-02 | 1.3  | NS       | NS   |
| NM_001080995 | <i>Ddias</i>     | BXD60 | 3.52E-02 | 1.6  | 4.26E-02 | 1.7  |
| NM_019553    | <i>Ddx21</i>     | BXD60 | 8.63E-03 | -1.5 | 1.36E-04 | -1.8 |
| NM_001252457 | <i>Ddx39b</i>    | BXD60 | NS       | NS   | 2.29E-03 | -1.4 |
| NM_001037752 | <i>Defb45</i>    | BXD60 | 4.68E-02 | -1.9 | NS       | NS   |
| NM_172477    | <i>Dennd2a</i>   | BXD60 | 4.87E-02 | 1.6  | NS       | NS   |
| NM_033562    | <i>Derl2</i>     | BXD60 | 4.82E-02 | 1.4  | NS       | NS   |
| NM_053272    | <i>Dhcr24</i>    | BXD60 | 2.64E-06 | -1.6 | 2.13E-06 | -1.6 |
| NM_025522    | <i>Dhrs7</i>     | BXD60 | 2.08E-02 | 1.6  | NS       | NS   |
| NM_172594    | <i>Dhx29</i>     | BXD60 | 3.85E-03 | -1.5 | NS       | NS   |
| NM_025447    | <i>Dimt1</i>     | BXD60 | 1.33E-02 | -1.4 | NS       | NS   |
| NM_025926    | <i>Dnajb4</i>    | BXD60 | 2.14E-03 | 1.5  | 5.93E-04 | 1.5  |
| NM_001163026 | <i>Dnajc13</i>   | BXD60 | 5.95E-03 | -1.5 | NS       | NS   |
| NM_029669    | <i>Dnajc18</i>   | BXD60 | 4.33E-02 | 1.3  | NS       | NS   |
| NM_009584    | <i>Dnajc2</i>    | BXD60 | 5.98E-03 | -1.5 | NS       | NS   |
| NM_001099738 | <i>Dnajc28</i>   | BXD60 | 3.31E-02 | 1.6  | NS       | NS   |
| NM_001199431 | <i>Dnmt1</i>     | BXD60 | NS       | NS   | 2.67E-03 | -1.8 |
| NM_172803    | <i>Dock4</i>     | BXD60 | 2.71E-02 | 1.4  | NS       | NS   |
| NM_007875    | <i>Dpagt1</i>    | BXD60 | 4.33E-02 | 1.5  | NS       | NS   |
| NM_172624    | <i>Dpp9</i>      | BXD60 | 3.88E-02 | -1.5 | NS       | NS   |
| NM_013503    | <i>Drd5</i>      | BXD60 | 2.79E-02 | 1.6  | NS       | NS   |
| NM_023842    | <i>Dsp</i>       | BXD60 | 1.40E-02 | 1.9  | NS       | NS   |
| NM_001285807 | <i>Dtna</i>      | BXD60 | 7.58E-07 | 1.6  | 5.79E-03 | 1.4  |
| NM_172442    | <i>Dtx4</i>      | BXD60 | 8.86E-05 | 1.6  | NS       | NS   |
| NM_013642    | <i>Dusp1</i>     | BXD60 | 2.84E-10 | 2.8  | 9.07E-09 | 2.6  |
| NM_019819    | <i>Dusp14</i>    | BXD60 | 1.80E-02 | 1.7  | NS       | NS   |
| NM_001048054 | <i>Dusp16</i>    | BXD60 | 2.26E-06 | 2.5  | 2.28E-04 | 2.1  |

|              |                 |       |          |      |          |      |
|--------------|-----------------|-------|----------|------|----------|------|
| NM_176933    | <i>Dusp4</i>    | BXD60 | NS       | NS   | 4.84E-02 | -1.6 |
| NM_001085390 | <i>Dusp5</i>    | BXD60 | 2.13E-02 | -1.6 | NS       | NS   |
| NM_026268    | <i>Dusp6</i>    | BXD60 | 1.51E-03 | -1.7 | NS       | NS   |
| NM_008748    | <i>Dusp8</i>    | BXD60 | 2.21E-10 | 1.8  | 4.97E-07 | 1.6  |
| NM_172859    | <i>Dzank1</i>   | BXD60 | 3.18E-02 | 1.6  | NS       | NS   |
| NM_001110331 | <i>Eci2</i>     | BXD60 | 2.29E-03 | 1.5  | NS       | NS   |
| NM_145537    | <i>Edem2</i>    | BXD60 | NS       | NS   | 3.14E-02 | 1.4  |
| NM_010104    | <i>Edn1</i>     | BXD60 | 7.18E-03 | 2.4  | 4.38E-03 | 2.7  |
| NM_025380    | <i>Eef1e1</i>   | BXD60 | 6.82E-05 | -1.6 | NS       | NS   |
| NM_025994    | <i>Efh2</i>     | BXD60 | NS       | NS   | 3.86E-02 | -1.6 |
| NM_010111    | <i>Efnb2</i>    | BXD60 | 1.95E-02 | -1.5 | NS       | NS   |
| NM_019397    | <i>Egfl6</i>    | BXD60 | 6.75E-04 | 2.2  | NS       | NS   |
| NM_001289925 | <i>Egr3</i>     | BXD60 | 4.61E-06 | -2.5 | 1.61E-04 | -2.2 |
| NM_018781    | <i>Egr3</i>     | BXD60 | NS       | NS   | 3.46E-02 | -1.7 |
| NM_010121    | <i>Eif2ak3</i>  | BXD60 | 4.58E-02 | 1.4  | 1.54E-02 | 1.6  |
| NM_016876    | <i>Eif3g</i>    | BXD60 | 5.19E-03 | -1.5 | NS       | NS   |
| NM_145625    | <i>Eif4b</i>    | BXD60 | 2.16E-02 | 1.3  | NS       | NS   |
| NM_175522    | <i>Elfn1</i>    | BXD60 | 8.90E-04 | -2.0 | NS       | NS   |
| NM_001170691 | <i>Elmod2</i>   | BXD60 | 8.48E-03 | 1.5  | NS       | NS   |
| NM_001253692 | <i>Elmod3</i>   | BXD60 | 1.64E-04 | 1.7  | NS       | NS   |
| NM_175101    | <i>Emc3</i>     | BXD60 | 1.72E-02 | 1.3  | NS       | NS   |
| NM_198299    | <i>Enkd1</i>    | BXD60 | 3.43E-02 | -1.5 | NS       | NS   |
| NM_001168620 | <i>Enpp5</i>    | BXD60 | 2.51E-02 | 1.3  | NS       | NS   |
| NM_001026214 | <i>Entpd5</i>   | BXD60 | 7.15E-04 | 1.8  | NS       | NS   |
| NM_175313    | <i>Eogt</i>     | BXD60 | 7.88E-03 | 1.6  | NS       | NS   |
| NM_013512    | <i>Epb41l4a</i> | BXD60 | 2.47E-03 | -1.5 | NS       | NS   |
| NM_013513    | <i>Epb42</i>    | BXD60 | 1.76E-02 | -1.7 | NS       | NS   |
| NM_007938    | <i>Epha6</i>    | BXD60 | 3.80E-02 | 1.6  | NS       | NS   |
| NM_015769    | <i>Ercc4</i>    | BXD60 | 1.19E-02 | 1.5  | NS       | NS   |
| NM_010155    | <i>Erf</i>      | BXD60 | 3.09E-02 | -1.6 | NS       | NS   |
| NM_001034891 | <i>Ermard</i>   | BXD60 | 1.40E-02 | 1.5  | NS       | NS   |
| NM_023913    | <i>Ern1</i>     | BXD60 | 2.28E-02 | 1.4  | NS       | NS   |
| NM_029250    | <i>Etnk1</i>    | BXD60 | 4.25E-02 | 1.3  | NS       | NS   |
| NM_001163154 | <i>Etv1</i>     | BXD60 | 9.03E-05 | -1.8 | NS       | NS   |
| NM_001083318 | <i>Etv3</i>     | BXD60 | 2.72E-02 | 1.6  | NS       | NS   |
| NM_008815    | <i>Etv4</i>     | BXD60 | 9.18E-04 | -1.7 | 2.04E-03 | -1.7 |
| NM_023794    | <i>Etv5</i>     | BXD60 | 5.25E-06 | -2.2 | 3.12E-04 | -1.9 |
| NM_001283061 | <i>Ewsr1</i>    | BXD60 | 1.23E-02 | -1.6 | NS       | NS   |

|              |                |       |          |      |          |      |
|--------------|----------------|-------|----------|------|----------|------|
| NM_001163514 | <i>Extl2</i>   | BXD60 | 1.76E-03 | 1.5  | NS       | NS   |
| NM_007970    | <i>Ezh1</i>    | BXD60 | 2.53E-02 | 1.3  | NS       | NS   |
| NM_010171    | <i>F3</i>      | BXD60 | 4.79E-02 | 1.5  | 3.92E-03 | 1.7  |
| NM_023480    | <i>Fahd1</i>   | BXD60 | 4.25E-02 | -1.6 | NS       | NS   |
| NM_001163567 | <i>Fam102b</i> | BXD60 | 3.95E-03 | 1.3  | NS       | NS   |
| NM_001242423 | <i>Fam105a</i> | BXD60 | 1.30E-02 | 1.7  | NS       | NS   |
| NM_183187    | <i>Fam107a</i> | BXD60 | 8.67E-07 | 3.6  | 1.03E-03 | 2.6  |
| NM_001034851 | <i>Fam134b</i> | BXD60 | NS       | NS   | 9.96E-03 | 1.4  |
| NM_026501    | <i>Fam134c</i> | BXD60 | 6.52E-03 | 1.8  | NS       | NS   |
| NM_153574    | <i>Fam13a</i>  | BXD60 | 5.13E-04 | 2.0  | NS       | NS   |
| NM_001033231 | <i>Fam195b</i> | BXD60 | 4.72E-02 | -1.5 | NS       | NS   |
| NM_182808    | <i>Fam19a1</i> | BXD60 | 1.64E-03 | 1.6  | 3.14E-02 | 1.5  |
| NM_153782    | <i>Fam20a</i>  | BXD60 | 6.68E-03 | 1.8  | NS       | NS   |
| NM_178908    | <i>Fam26e</i>  | BXD60 | 4.61E-06 | 2.3  | 1.32E-06 | 2.4  |
| NM_001160378 | <i>Fam46a</i>  | BXD60 | 3.49E-02 | 1.6  | NS       | NS   |
| NM_175104    | <i>Fam53c</i>  | BXD60 | 3.81E-03 | 1.8  | 6.77E-03 | 1.8  |
| NM_177893    | <i>Fan1</i>    | BXD60 | 5.26E-04 | 2.0  | NS       | NS   |
| NM_178797    | <i>Far2</i>    | BXD60 | 4.28E-04 | -1.6 | 1.11E-02 | -1.4 |
| NM_007991    | <i>Fbl</i>     | BXD60 | 2.35E-02 | -1.3 | 3.68E-02 | -1.4 |
| NM_001024142 | <i>Fbxo10</i>  | BXD60 | 2.49E-03 | 1.8  | NS       | NS   |
| NM_001163702 | <i>Fbxo27</i>  | BXD60 | 1.17E-02 | 1.6  | NS       | NS   |
| NM_134136    | <i>Fbxo38</i>  | BXD60 | 2.76E-02 | 1.4  | NS       | NS   |
| NM_015791    | <i>Fbxo8</i>   | BXD60 | 2.02E-02 | 1.4  | NS       | NS   |
| NM_010191    | <i>Fdft1</i>   | BXD60 | 2.64E-06 | -1.5 | 2.04E-05 | -1.5 |
| NM_001253751 | <i>Fdps</i>    | BXD60 | 3.34E-02 | -1.5 | NS       | NS   |
| NM_015759    | <i>Fgd3</i>    | BXD60 | 1.52E-02 | -1.7 | NS       | NS   |
| NM_010197    | <i>Fgf1</i>    | BXD60 | 8.63E-03 | 1.9  | NS       | NS   |
| NM_010201    | <i>Fgf14</i>   | BXD60 | 2.49E-02 | 1.5  | NS       | NS   |
| NM_028263    | <i>Fgfbp3</i>  | BXD60 | 2.41E-02 | -1.5 | NS       | NS   |
| NM_001163215 | <i>Fgfr3</i>   | BXD60 | 1.44E-03 | 1.8  | NS       | NS   |
| NM_001164259 | <i>Fgfrl1</i>  | BXD60 | 1.03E-02 | -1.6 | 1.35E-02 | -1.6 |
| NM_008013    | <i>Fgl2</i>    | BXD60 | 6.83E-05 | 1.9  | NS       | NS   |
| NM_153573    | <i>Fkbp14</i>  | BXD60 | 7.40E-03 | 1.7  | NS       | NS   |
| NM_010219    | <i>Fkbp4</i>   | BXD60 | 4.10E-03 | -1.4 | NS       | NS   |
| NM_022009    | <i>Flii</i>    | BXD60 | 1.74E-02 | -1.5 | NS       | NS   |
| NM_001077698 | <i>Fmnl1</i>   | BXD60 | NS       | NS   | 4.26E-02 | -1.7 |
| NM_001038699 | <i>Fn3k</i>    | BXD60 | NS       | NS   | 3.14E-02 | 1.7  |
| NM_181420    | <i>Fn3krp</i>  | BXD60 | 4.91E-03 | 1.6  | NS       | NS   |

|              |                |       |          |      |          |      |
|--------------|----------------|-------|----------|------|----------|------|
| NM_001159706 | <i>Folh1</i>   | BXD60 | 1.25E-02 | 1.9  | NS       | NS   |
| NM_018789    | <i>Foxo4</i>   | BXD60 | 8.80E-03 | 1.9  | NS       | NS   |
| NM_001081172 | <i>Frmpd1</i>  | BXD60 | 4.31E-02 | 1.5  | NS       | NS   |
| NM_025799    | <i>Fuca2</i>   | BXD60 | 1.59E-02 | 1.4  | NS       | NS   |
| NM_028058    | <i>Fundc1</i>  | BXD60 | 8.70E-03 | 1.5  | NS       | NS   |
| NM_001012517 | <i>Fut10</i>   | BXD60 | NS       | NS   | 3.12E-02 | 1.9  |
| NM_021458    | <i>Fzd3</i>    | BXD60 | 3.52E-02 | 1.3  | NS       | NS   |
| NM_001162494 | <i>Fzd6</i>    | BXD60 | 3.82E-02 | 1.5  | NS       | NS   |
| NM_008065    | <i>Gabpa</i>   | BXD60 | 1.30E-02 | 1.4  | NS       | NS   |
| NM_010252    | <i>Gabrg1</i>  | BXD60 | 3.75E-02 | 1.5  | NS       | NS   |
| NM_001160404 | <i>Galnt1</i>  | BXD60 | 2.41E-02 | 1.4  | NS       | NS   |
| NM_001081421 | <i>Galnt16</i> | BXD60 | 1.73E-04 | 1.7  | NS       | NS   |
| NM_010256    | <i>Gart</i>    | BXD60 | NS       | NS   | 1.68E-02 | -1.6 |
| NM_030719    | <i>Gatsl2</i>  | BXD60 | 4.92E-03 | 1.6  | NS       | NS   |
| NM_001161712 | <i>Gcat</i>    | BXD60 | 3.25E-02 | -1.6 | NS       | NS   |
| NM_182694    | <i>Ggn</i>     | BXD60 | 1.03E-02 | -1.7 | NS       | NS   |
| NM_010288    | <i>Gja1</i>    | BXD60 | 2.69E-02 | 1.4  | NS       | NS   |
| ENSMUST0000  |                |       |          |      |          | NS   |
| 0108014      | <i>Gm10985</i> | BXD60 | 2.43E-02 | -2.0 | NS       |      |
| NR_040366    | <i>Gm15446</i> | BXD60 | 1.51E-02 | 1.4  | NS       | NS   |
| ENSMUST0000  |                |       |          |      |          | NS   |
| 0180340      | <i>Gm20926</i> | BXD60 | 3.87E-02 | -1.6 | NS       |      |
| ENSMUST0000  |                |       |          |      |          | -2.6 |
| 0177775      | <i>Gm21095</i> | BXD60 | NS       | NS   | 1.12E-02 |      |
| ENSMUST0000  |                |       |          |      |          | -2.9 |
| 0179811      | <i>Gm21760</i> | BXD60 | NS       | NS   | 1.40E-02 |      |
| ENSMUST0000  |                |       |          |      |          | NS   |
| 0178374      | <i>Gm21874</i> | BXD60 | 2.57E-02 | 1.9  | NS       |      |
| NM_001177715 | <i>Gm2897</i>  | BXD60 | 3.68E-02 | -1.5 | NS       | NS   |
| ENSMUST0000  |                |       |          |      |          | NS   |
| 0164069      | <i>Gm3047</i>  | BXD60 | 2.81E-02 | -1.9 | NS       |      |
| ENSMUST0000  |                |       |          |      |          | NS   |
| 0167882      | <i>Gm3460</i>  | BXD60 | 3.68E-02 | -1.8 | NS       |      |
| ENSMUST0000  |                |       |          |      |          | NS   |
| 0097935      | <i>Gm6471</i>  | BXD60 | 1.70E-02 | -1.7 | NS       |      |
| ENSMUST0000  |                |       |          |      |          | NS   |
| 0163738      | <i>Gm8159</i>  | BXD60 | 1.90E-02 | -2.0 | NS       |      |
| ENSMUST0000  |                |       |          |      |          | NS   |
| 0171636      | <i>Gm8297</i>  | BXD60 | 3.74E-02 | -1.9 | NS       |      |
| NM_177992    | <i>Gmpr2</i>   | BXD60 | NS       | NS   | 3.15E-02 | 1.5  |
| NM_001190414 | <i>Gne</i>     | BXD60 | NS       | NS   | 2.02E-02 | -1.5 |
| NM_010317    | <i>Gng4</i>    | BXD60 | 4.19E-02 | -1.4 | NS       | NS   |

|              |                  |       |          |      |          |      |
|--------------|------------------|-------|----------|------|----------|------|
| NM_153547    | <i>Gnl3</i>      | BXD60 | 5.54E-03 | -1.7 | NS       | NS   |
| NM_001035122 | <i>Golm1</i>     | BXD60 | 6.84E-04 | 1.7  | NS       | NS   |
| NM_008149    | <i>Gpam</i>      | BXD60 | 2.48E-04 | 1.5  | 2.72E-02 | 1.3  |
| NM_001110809 | <i>Gpatch4</i>   | BXD60 | 4.50E-02 | -1.5 | NS       | NS   |
| NM_027518    | <i>Gpr137c</i>   | BXD60 | 8.32E-10 | 2.3  | 6.06E-09 | 2.3  |
| NM_001190297 | <i>Gpr155</i>    | BXD60 | 2.76E-02 | 1.5  | NS       | NS   |
| NM_177366    | <i>Gpr157</i>    | BXD60 | NS       | NS   | 4.39E-02 | 1.7  |
| NM_001004761 | <i>Gpr158</i>    | BXD60 | 4.79E-02 | 1.6  | NS       | NS   |
| NM_001167694 | <i>Gpr19</i>     | BXD60 | 2.36E-03 | 1.6  | NS       | NS   |
| NM_010338    | <i>Gpr37</i>     | BXD60 | 5.12E-06 | 2.2  | NS       | NS   |
| NM_175490    | <i>Gpr75</i>     | BXD60 | 4.99E-02 | 1.3  | NS       | NS   |
| NM_145066    | <i>Gpr85</i>     | BXD60 | 5.60E-06 | 1.9  | 1.54E-03 | 1.6  |
| NM_001195774 | <i>Gprc5b</i>    | BXD60 | 2.43E-02 | 1.5  | NS       | NS   |
| NM_029522    | <i>Gpsm2</i>     | BXD60 | 5.54E-04 | 1.9  | NS       | NS   |
| NM_173866    | <i>Gpt2</i>      | BXD60 | 1.77E-02 | 1.6  | NS       | NS   |
| NM_172768    | <i>Gramd1b</i>   | BXD60 | 1.52E-02 | 1.4  | NS       | NS   |
| NM_080289    | <i>Grhpr</i>     | BXD60 | 8.48E-03 | 1.7  | NS       | NS   |
| NM_018869    | <i>Grk5</i>      | BXD60 | 1.55E-02 | 1.5  | NS       | NS   |
| NM_001114333 | <i>Grm1</i>      | BXD60 | 1.34E-04 | 1.8  | NS       | NS   |
| NM_008175    | <i>Grn</i>       | BXD60 | 2.23E-04 | 1.5  | NS       | NS   |
| NM_026231    | <i>Gstcd</i>     | BXD60 | NS       | NS   | 3.12E-02 | -1.9 |
| NM_029555    | <i>Gstk1</i>     | BXD60 | 1.52E-04 | 2.0  | NS       | NS   |
| NM_001160411 | <i>Gstm4</i>     | BXD60 | 1.67E-02 | 1.5  | NS       | NS   |
| NM_026672    | <i>Gstm7</i>     | BXD60 | 1.98E-04 | 2.0  | NS       | NS   |
| NM_016750    | <i>H2afz</i>     | BXD60 | 1.33E-02 | 1.3  | NS       | NS   |
| NM_019975    | <i>Hacl1</i>     | BXD60 | 1.57E-02 | 1.6  | NS       | NS   |
| NM_008216    | <i>Has2</i>      | BXD60 | 3.55E-02 | -2.0 | NS       | NS   |
| NM_008217    | <i>Has3</i>      | BXD60 | 2.49E-02 | -1.9 | NS       | NS   |
| NM_001081192 | <i>Hcn4</i>      | BXD60 | 1.95E-02 | -1.5 | NS       | NS   |
| NM_027382    | <i>Hdac8</i>     | BXD60 | 1.46E-02 | 1.5  | 4.93E-02 | 1.4  |
| NM_001080549 | <i>Hdx</i>       | BXD60 | 1.11E-02 | 2.0  | NS       | NS   |
| NM_144835    | <i>Heatr1</i>    | BXD60 | 3.73E-02 | -1.5 | 1.37E-02 | -1.7 |
| NM_175256    | <i>Heg1</i>      | BXD60 | 9.01E-04 | 1.8  | NS       | NS   |
| NM_022331    | <i>Herpud1</i>   | BXD60 | 1.83E-02 | 1.4  | NS       | NS   |
| NM_145567    | <i>Hibadh</i>    | BXD60 | 2.48E-03 | 1.6  | NS       | NS   |
| NM_001162950 | <i>Hif3a</i>     | BXD60 | 3.49E-03 | 2.2  | 1.40E-02 | 2.1  |
| NM_010377    | <i>Hist1h1t</i>  | BXD60 | 2.35E-02 | -1.7 | NS       | NS   |
| NM_178213    | <i>Hist2h2ab</i> | BXD60 | 6.32E-04 | -1.9 | NS       | NS   |



|              |                 |       |          |      |          |      |
|--------------|-----------------|-------|----------|------|----------|------|
| NM_010657    | <i>Hivep3</i>   | BXD60 | 2.13E-03 | 1.7  | NS       | NS   |
| NM_177338    | <i>Hmbox1</i>   | BXD60 | 4.53E-02 | 1.4  | NS       | NS   |
| NM_025812    | <i>Hmg20a</i>   | BXD60 | 2.74E-02 | 1.4  | NS       | NS   |
| NM_008255    | <i>Hmgcr</i>    | BXD60 | 4.89E-05 | -1.8 | 3.34E-03 | -1.6 |
| NM_008256    | <i>Hmgcs2</i>   | BXD60 | NS       | NS   | 4.88E-02 | 1.9  |
| NM_198937    | <i>Hn1l</i>     | BXD60 | 3.95E-03 | -1.7 | NS       | NS   |
| NM_013751    | <i>Hrasls</i>   | BXD60 | 3.30E-02 | 1.7  | NS       | NS   |
| NM_053262    | <i>Hsd17b11</i> | BXD60 | 3.52E-02 | 1.4  | NS       | NS   |
| NM_010476    | <i>Hsd17b7</i>  | BXD60 | 1.17E-03 | -1.6 | 3.15E-02 | -1.4 |
| NM_024255    | <i>Hsdl2</i>    | BXD60 | 3.14E-05 | 1.8  | NS       | NS   |
| NM_001163434 | <i>Hspa5</i>    | BXD60 | 4.90E-02 | 1.3  | NS       | NS   |
| NM_019564    | <i>Htra1</i>    | BXD60 | 2.17E-04 | 1.9  | 9.14E-03 | 1.7  |
| NM_015790    | <i>Icosl</i>    | BXD60 | 3.63E-03 | 1.8  | NS       | NS   |
| NM_010495    | <i>Id1</i>      | BXD60 | 3.26E-02 | 1.7  | NS       | NS   |
| NM_031166    | <i>Id4</i>      | BXD60 | 3.08E-02 | 1.9  | NS       | NS   |
| NM_145360    | <i>Idi1</i>     | BXD60 | 1.60E-07 | -2.1 | 6.84E-08 | -2.2 |
| BC008167     | <i>Ifi203</i>   | BXD60 | 2.49E-02 | 1.8  | NS       | NS   |
| NM_013562    | <i>Ifrd1</i>    | BXD60 | NS       | NS   | 5.68E-03 | -1.7 |
| NM_018854    | <i>Ift20</i>    | BXD60 | 1.54E-02 | 1.3  | NS       | NS   |
| NM_010515    | <i>Igf2r</i>    | BXD60 | 1.02E-02 | 1.6  | NS       | NS   |
| NM_001033323 | <i>Igsf9b</i>   | BXD60 | 5.08E-03 | 1.8  | NS       | NS   |
| NM_010551    | <i>Il16</i>     | BXD60 | 3.75E-02 | 1.5  | NS       | NS   |
| NM_026574    | <i>Ino80</i>    | BXD60 | 2.77E-03 | -1.5 | NS       | NS   |
| NM_001127363 | <i>Inpp5a</i>   | BXD60 | 2.04E-03 | 1.5  | NS       | NS   |
| NM_008385    | <i>Inpp5b</i>   | BXD60 | 2.68E-02 | 1.6  | NS       | NS   |
| NM_172439    | <i>Inpp5j</i>   | BXD60 | 7.36E-04 | 2.0  | 2.72E-03 | 1.9  |
| NM_008916    | <i>Inpp5k</i>   | BXD60 | 1.53E-02 | 1.4  | 2.57E-02 | 1.4  |
| NM_153526    | <i>Insig1</i>   | BXD60 | 1.46E-03 | -1.8 | 9.98E-06 | -2.2 |
| NM_010568    | <i>Insr</i>     | BXD60 | 1.43E-02 | 1.3  | NS       | NS   |
| NM_023579    | <i>Ipo5</i>     | BXD60 | NS       | NS   | 1.29E-02 | -1.3 |
| NM_001164598 | <i>Irf2bp2</i>  | BXD60 | 4.54E-02 | 1.3  | NS       | NS   |
| NM_016851    | <i>Irf6</i>     | BXD60 | 1.92E-02 | 1.6  | NS       | NS   |
| NM_177290    | <i>Itgb8</i>    | BXD60 | 5.07E-03 | 1.7  | NS       | NS   |
| NM_010586    | <i>Itpr2</i>    | BXD60 | 1.13E-02 | 1.5  | NS       | NS   |
| NM_001110275 | <i>Itsn1</i>    | BXD60 | 1.26E-02 | 1.3  | NS       | NS   |
| NM_001205043 | <i>Jarid2</i>   | BXD60 | 4.69E-02 | 1.4  | NS       | NS   |
| NM_010591    | <i>Jun</i>      | BXD60 | 3.46E-13 | 3.3  | 5.68E-14 | 3.4  |
| NM_001286944 | <i>Jund</i>     | BXD60 | 6.95E-04 | 1.6  | 3.45E-02 | 1.5  |

|              |                |       |          |      |          |      |
|--------------|----------------|-------|----------|------|----------|------|
| NM_001038010 | <i>Kat2a</i>   | BXD60 | 2.77E-03 | -1.4 | NS       | NS   |
| NM_026370    | <i>Kat8</i>    | BXD60 | 2.67E-03 | -1.7 | NS       | NS   |
| NM_029116    | <i>Kbtbd11</i> | BXD60 | 2.13E-02 | 1.5  | NS       | NS   |
| NM_001039347 | <i>Kcnd3</i>   | BXD60 | 2.23E-04 | -1.7 | 4.24E-03 | -1.6 |
| NM_001081134 | <i>Kcng1</i>   | BXD60 | 5.95E-03 | -1.8 | 1.02E-02 | -1.8 |
| NM_029911    | <i>Kcnk10</i>  | BXD60 | 3.49E-04 | 1.8  | 2.71E-02 | 1.5  |
| NM_001159850 | <i>Kcnk2</i>   | BXD60 | 3.68E-02 | 1.4  | NS       | NS   |
| NM_026135    | <i>Kctd16</i>  | BXD60 | 4.28E-04 | 2.0  | NS       | NS   |
| NM_172650    | <i>Kctd3</i>   | BXD60 | 3.49E-02 | 1.5  | NS       | NS   |
| NM_026214    | <i>Kctd4</i>   | BXD60 | 1.59E-02 | 1.4  | 2.07E-02 | 1.4  |
| NM_027008    | <i>Kctd5</i>   | BXD60 | NS       | NS   | 4.23E-02 | 1.4  |
| NM_001033430 | <i>Kdm7a</i>   | BXD60 | 4.14E-02 | 1.6  | NS       | NS   |
| NM_011317    | <i>Khdrbs1</i> | BXD60 | NS       | NS   | 3.15E-02 | -1.4 |
| NM_010616    | <i>Kif12</i>   | BXD60 | 1.54E-02 | -1.5 | NS       | NS   |
| NM_001145779 | <i>Kif2a</i>   | BXD60 | 3.25E-02 | -1.3 | NS       | NS   |
| NM_001122733 | <i>Kit</i>     | BXD60 | 1.75E-02 | -1.3 | NS       | NS   |
| NM_001033298 | <i>Kiz</i>     | BXD60 | 6.06E-03 | 1.6  | NS       | NS   |
| NM_078477    | <i>Klf16</i>   | BXD60 | 9.50E-05 | -1.9 | 2.43E-06 | -2.1 |
| NM_011803    | <i>Klf6</i>    | BXD60 | 3.25E-02 | -1.4 | NS       | NS   |
| NM_010638    | <i>Klf9</i>    | BXD60 | 3.30E-03 | 1.5  | NS       | NS   |
| NM_001033039 | <i>Klhdc9</i>  | BXD60 | NS       | NS   | 3.14E-02 | 2.0  |
| NM_153128    | <i>Klhl12</i>  | BXD60 | 1.36E-03 | 1.8  | NS       | NS   |
| NM_029436    | <i>Klhl24</i>  | BXD60 | NS       | NS   | 1.61E-03 | 1.5  |
| NM_001195075 | <i>Klhl3</i>   | BXD60 | 3.49E-02 | 1.5  | NS       | NS   |
| NM_001161800 | <i>Klhl7</i>   | BXD60 | NS       | NS   | 2.43E-02 | 1.5  |
| NM_001177373 | <i>Klk11</i>   | BXD60 | 3.80E-02 | 1.6  | NS       | NS   |
| NM_010655    | <i>Kpna2</i>   | BXD60 | 5.55E-04 | -1.6 | 1.40E-02 | -1.5 |
| NM_008466    | <i>Kpna3</i>   | BXD60 | 1.62E-03 | -1.3 | NS       | NS   |
| NM_021284    | <i>Kras</i>    | BXD60 | NS       | NS   | 4.53E-02 | -1.3 |
| NM_178610    | <i>Krr1</i>    | BXD60 | 3.73E-03 | -1.7 | NS       | NS   |
| NM_010660    | <i>Krt10</i>   | BXD60 | 4.92E-02 | -1.5 | NS       | NS   |
| NM_010662    | <i>Krt13</i>   | BXD60 | 3.52E-02 | -1.8 | NS       | NS   |
| NM_026774    | <i>Lamtor5</i> | BXD60 | 2.05E-02 | 1.3  | NS       | NS   |
| NM_008640    | <i>Laptn4a</i> | BXD60 | 4.33E-02 | 1.3  | NS       | NS   |
| NM_138593    | <i>Larp7</i>   | BXD60 | 3.49E-02 | -1.4 | NS       | NS   |
| NM_010694    | <i>Lcn3</i>    | BXD60 | 2.43E-02 | -1.7 | NS       | NS   |
| NM_001247984 | <i>Lcp1</i>    | BXD60 | NS       | NS   | 3.96E-02 | -1.5 |
| NM_001077398 | <i>Ldb2</i>    | BXD60 | 1.43E-03 | -1.7 | NS       | NS   |

|              |                 |       |          |      |          |      |
|--------------|-----------------|-------|----------|------|----------|------|
| NM_001252658 | <i>Ldlr</i>     | BXD60 | 3.98E-05 | -2.4 | 1.36E-04 | -2.4 |
| NM_134093    | <i>Letmd1</i>   | BXD60 | 2.89E-02 | 1.3  | NS       | NS   |
| NM_008494    | <i>Lfn3</i>     | BXD60 | 5.13E-04 | 1.7  | 1.21E-02 | 1.5  |
| NM_001199043 | <i>Lgals8</i>   | BXD60 | 6.75E-04 | 1.6  | 4.01E-02 | 1.4  |
| NM_020278    | <i>Lgi1</i>     | BXD60 | 2.43E-02 | 1.4  | NS       | NS   |
| NM_145219    | <i>Lgi3</i>     | BXD60 | 4.79E-02 | 1.6  | NS       | NS   |
| NM_011175    | <i>Lgmn</i>     | BXD60 | 2.06E-02 | 1.3  | NS       | NS   |
| NM_001083125 | <i>Lhx6</i>     | BXD60 | 3.70E-02 | -1.7 | NS       | NS   |
| NM_001001980 | <i>Limch1</i>   | BXD60 | 6.10E-04 | 1.8  | NS       | NS   |
| NM_013860    | <i>Limd1</i>    | BXD60 | 9.30E-03 | 2.0  | NS       | NS   |
| NM_144862    | <i>Lims2</i>    | BXD60 | 1.05E-02 | 2.0  | NS       | NS   |
| NM_181074    | <i>Lingo1</i>   | BXD60 | 2.40E-03 | -1.3 | NS       | NS   |
| NM_201529    | <i>Lmo7</i>     | BXD60 | 7.31E-05 | 1.6  | NS       | NS   |
| NM_028894    | <i>Lonrf3</i>   | BXD60 | 1.32E-02 | 1.8  | NS       | NS   |
| NM_008377    | <i>Lrig1</i>    | BXD60 | NS       | NS   | 2.99E-02 | -1.5 |
| NM_008512    | <i>Lrp1</i>     | BXD60 | 2.79E-02 | 1.4  | NS       | NS   |
| NM_001146048 | <i>Lrrc1</i>    | BXD60 | 1.63E-03 | 2.0  | NS       | NS   |
| NM_001172064 | <i>Lrrc56</i>   | BXD60 | 8.34E-03 | 1.8  | NS       | NS   |
| NM_133807    | <i>Lrrc59</i>   | BXD60 | NS       | NS   | 2.43E-02 | -1.4 |
| NM_178005    | <i>Lrrtm2</i>   | BXD60 | NS       | NS   | 3.46E-02 | 1.4  |
| NM_181470    | <i>Ltv1</i>     | BXD60 | 3.49E-03 | -1.8 | NS       | NS   |
| NM_001252055 | <i>Ly6c1</i>    | BXD60 | 1.68E-04 | 2.7  | NS       | NS   |
| NM_010748    | <i>Lyst</i>     | BXD60 | 2.18E-02 | 1.7  | NS       | NS   |
| NM_172865    | <i>Manea</i>    | BXD60 | 1.40E-02 | 1.5  | NS       | NS   |
| NM_001081230 | <i>Map9</i>     | BXD60 | 3.78E-02 | -1.3 | NS       | NS   |
| NM_001045483 | <i>Mapk1ip1</i> | BXD60 | 2.36E-03 | 1.4  | NS       | NS   |
| NM_011841    | <i>Mapk7</i>    | BXD60 | 3.44E-03 | -1.4 | 3.68E-02 | -1.4 |
| NM_175171    | <i>Mast4</i>    | BXD60 | 7.28E-03 | 1.4  | NS       | NS   |
| NM_175341    | <i>Mbnl2</i>    | BXD60 | 2.68E-02 | 1.4  | NS       | NS   |
| NM_001167910 | <i>Mbtps1</i>   | BXD60 | 3.00E-02 | 1.4  | NS       | NS   |
| NM_008563    | <i>Mcm3</i>     | BXD60 | NS       | NS   | 6.84E-03 | -1.9 |
| NM_008566    | <i>Mcm5</i>     | BXD60 | 2.27E-02 | -1.8 | NS       | NS   |
| NM_001288586 | <i>Mdm2</i>     | BXD60 | 1.65E-03 | 1.6  | NS       | NS   |
| NM_027213    | <i>Med6</i>     | BXD60 | 1.74E-02 | 1.4  | NS       | NS   |
| NM_001001979 | <i>Megf10</i>   | BXD60 | 7.63E-03 | 1.6  | NS       | NS   |
| NM_001168488 | <i>Men1</i>     | BXD60 | NS       | NS   | 4.84E-02 | -1.3 |
| NM_008587    | <i>Mertk</i>    | BXD60 | 4.69E-04 | 2.4  | 3.00E-03 | 2.2  |
| NM_008591    | <i>Met</i>      | BXD60 | 4.90E-02 | -1.6 | NS       | NS   |

|              |                |       |          |      |          |      |
|--------------|----------------|-------|----------|------|----------|------|
| NM_175224    | <i>Metap1</i>  | BXD60 | 2.14E-02 | -1.4 | NS       | NS   |
| NM_027279    | <i>Mettl18</i> | BXD60 | 1.43E-02 | 1.9  | NS       | NS   |
| NM_024200    | <i>Mfn1</i>    | BXD60 | 4.67E-03 | 1.5  | NS       | NS   |
| NM_029662    | <i>Mfsd2a</i>  | BXD60 | 3.98E-03 | 1.7  | NS       | NS   |
| NM_173870    | <i>Mgat4a</i>  | BXD60 | 1.06E-03 | 1.7  | NS       | NS   |
| NM_023799    | <i>Mgea5</i>   | BXD60 | 1.46E-03 | 1.4  | 1.20E-03 | 1.4  |
| NM_001166249 | <i>Mgll</i>    | BXD60 | 1.32E-03 | 1.9  | NS       | NS   |
| NM_030110    | <i>Micu3</i>   | BXD60 | 1.76E-03 | 1.4  | NS       | NS   |
| NM_021565    | <i>Midn</i>    | BXD60 | 2.13E-03 | -1.5 | 9.10E-03 | -1.5 |
| NM_001243584 | <i>Mif4gd</i>  | BXD60 | 8.48E-03 | 1.7  | NS       | NS   |
| NM_021462    | <i>Mknk2</i>   | BXD60 | 8.02E-04 | 1.6  | NS       | NS   |
| NM_175337    | <i>Mlh3</i>    | BXD60 | 2.28E-02 | 1.7  | NS       | NS   |
| NM_175217    | <i>Mmd2</i>    | BXD60 | 8.20E-04 | 1.4  | NS       | NS   |
| NM_008609    | <i>Mmp15</i>   | BXD60 | 1.74E-02 | -1.5 | 2.82E-02 | -1.5 |
| NM_001081235 | <i>Mn1</i>     | BXD60 | 4.20E-02 | -1.4 | NS       | NS   |
| NM_001081287 | <i>Mpp7</i>    | BXD60 | 1.74E-02 | 1.8  | NS       | NS   |
| NM_172610    | <i>Mpped1</i>  | BXD60 | 8.38E-03 | -1.5 | NS       | NS   |
| NM_025878    | <i>Mrps18b</i> | BXD60 | 3.21E-02 | -1.4 | NS       | NS   |
| NM_025434    | <i>Mrps28</i>  | BXD60 | 2.00E-02 | -1.6 | NS       | NS   |
| NM_146222    | <i>Msantd2</i> | BXD60 | 3.57E-04 | -1.8 | NS       | NS   |
| NM_010830    | <i>Msh6</i>    | BXD60 | NS       | NS   | 3.26E-02 | -1.4 |
| NM_025436    | <i>Msmo1</i>   | BXD60 | 8.86E-05 | -2.0 | 5.11E-05 | -2.1 |
| NM_029619    | <i>Msrp2</i>   | BXD60 | 8.48E-03 | 1.8  | NS       | NS   |
| NM_013602    | <i>Mt1</i>     | BXD60 | 2.75E-03 | 1.6  | 1.90E-02 | 1.5  |
| NM_008630    | <i>Mt2</i>     | BXD60 | 2.61E-07 | 2.9  | 3.84E-05 | 2.4  |
| NM_026788    | <i>Mthfd2l</i> | BXD60 | NS       | NS   | 4.13E-02 | -1.4 |
| NM_198625    | <i>Mtss1l</i>  | BXD60 | 2.31E-02 | -1.3 | NS       | NS   |
| NM_001005863 | <i>Mtus1</i>   | BXD60 | 2.04E-03 | 1.7  | NS       | NS   |
| NM_023431    | <i>Mum1</i>    | BXD60 | NS       | NS   | 1.84E-02 | -1.5 |
| NM_027877    | <i>Mus81</i>   | BXD60 | 4.13E-02 | -1.6 | NS       | NS   |
| NM_138656    | <i>Mvd</i>     | BXD60 | 8.15E-05 | -2.1 | 1.20E-02 | -1.7 |
| NM_010753    | <i>Mxd4</i>    | BXD60 | 8.67E-04 | 1.8  | NS       | NS   |
| NM_001008542 | <i>Mxi1</i>    | BXD60 | 1.51E-08 | 1.9  | 1.35E-04 | 1.6  |
| NM_008651    | <i>Mybl1</i>   | BXD60 | 2.72E-02 | 1.7  | NS       | NS   |
| NM_001177352 | <i>Myc</i>     | BXD60 | 2.29E-02 | -1.5 | NS       | NS   |
| NM_019472    | <i>Myo10</i>   | BXD60 | 1.63E-03 | 1.8  | NS       | NS   |
| NM_001171615 | <i>Myt1</i>    | BXD60 | 3.94E-03 | 1.6  | 1.78E-02 | 1.6  |
| NM_001040395 | <i>Nadk2</i>   | BXD60 | 6.82E-05 | 1.6  | NS       | NS   |

|              |                |       |          |      |          |      |
|--------------|----------------|-------|----------|------|----------|------|
| NM_001163564 | <i>Naf1</i>    | BXD60 | 1.64E-02 | -1.6 | NS       | NS   |
| NM_178728    | <i>Napepld</i> | BXD60 | 8.81E-03 | 2.1  | NS       | NS   |
| NM_026272    | <i>Narf</i>    | BXD60 | 1.30E-02 | 1.6  | NS       | NS   |
| NM_001145959 | <i>Ndrg2</i>   | BXD60 | 7.56E-03 | 1.3  | NS       | NS   |
| NM_022565    | <i>Ndst4</i>   | BXD60 | NS       | NS   | 5.18E-03 | 1.9  |
| NM_010886    | <i>Ndufa4</i>  | BXD60 | 4.86E-02 | 1.2  | NS       | NS   |
| NM_026742    | <i>Ndufaf4</i> | BXD60 | 5.33E-04 | -1.6 | NS       | NS   |
| NM_001111324 | <i>Nedd9</i>   | BXD60 | 8.61E-03 | 1.6  | NS       | NS   |
| NM_001113209 | <i>Nfib</i>    | BXD60 | 1.82E-02 | 1.3  | NS       | NS   |
| NM_010911    | <i>Nfs1</i>    | BXD60 | 2.25E-02 | 1.6  | NS       | NS   |
| NM_001048168 | <i>Nfyc</i>    | BXD60 | NS       | NS   | 4.23E-02 | -1.4 |
| NM_025449    | <i>Nicn1</i>   | BXD60 | 1.50E-03 | 1.3  | NS       | NS   |
| NM_026472    | <i>Nifk</i>    | BXD60 | 2.15E-02 | -1.3 | NS       | NS   |
| NM_145469    | <i>Nipal2</i>  | BXD60 | 6.32E-04 | 1.7  | NS       | NS   |
| NM_028995    | <i>Nipal3</i>  | BXD60 | 6.38E-03 | 1.7  | NS       | NS   |
| NM_025937    | <i>Nkap</i>    | BXD60 | 4.79E-02 | -1.7 | NS       | NS   |
| NM_028186    | <i>Nkd2</i>    | BXD60 | 4.43E-02 | 1.6  | NS       | NS   |
| NM_138314    | <i>Nme7</i>    | BXD60 | 1.02E-02 | 1.5  | NS       | NS   |
| NM_145497    | <i>Nmrk1</i>   | BXD60 | 3.08E-04 | 2.6  | NS       | NS   |
| NM_021303    | <i>Noc2l</i>   | BXD60 | NS       | NS   | 3.57E-02 | -1.4 |
| NM_009834    | <i>Noct</i>    | BXD60 | 3.56E-03 | -1.6 | NS       | NS   |
| NM_001001986 | <i>Nol4l</i>   | BXD60 | 4.79E-02 | -1.4 | 9.14E-03 | -1.5 |
| NM_138747    | <i>Nop2</i>    | BXD60 | NS       | NS   | 4.24E-03 | -1.5 |
| NM_024193    | <i>Nop56</i>   | BXD60 | 5.38E-03 | -1.6 | 1.63E-02 | -1.6 |
| NM_018868    | <i>Nop58</i>   | BXD60 | 4.54E-02 | -1.3 | NS       | NS   |
| NM_021361    | <i>Nova1</i>   | BXD60 | 2.21E-02 | 1.5  | NS       | NS   |
| NM_008719    | <i>Npas2</i>   | BXD60 | 4.79E-02 | -1.8 | NS       | NS   |
| NM_013780    | <i>Npas3</i>   | BXD60 | NS       | NS   | 2.78E-02 | -1.5 |
| NM_010342    | <i>Npbwr1</i>  | BXD60 | 1.02E-02 | 1.7  | NS       | NS   |
| NM_018787    | <i>Npff</i>    | BXD60 | 4.78E-02 | 1.3  | NS       | NS   |
| NM_008723    | <i>Npm3</i>    | BXD60 | NS       | NS   | 1.18E-02 | -1.7 |
| NM_010934    | <i>Npy1r</i>   | BXD60 | 4.31E-02 | -1.4 | NS       | NS   |
| NM_001139509 | <i>Nr4a2</i>   | BXD60 | 4.25E-02 | -2.2 | NS       | NS   |
| NM_001164363 | <i>Nt5c2</i>   | BXD60 | 1.63E-03 | 1.4  | NS       | NS   |
| NM_153136    | <i>Nudt18</i>  | BXD60 | 1.17E-02 | 1.6  | NS       | NS   |
| NM_008751    | <i>Nxph1</i>   | BXD60 | NS       | NS   | 3.82E-02 | -1.4 |
| NM_001161430 | <i>Nxt2</i>    | BXD60 | 8.21E-04 | 1.5  | NS       | NS   |
| NM_178644    | <i>Oaf</i>     | BXD60 | 2.40E-03 | 2.2  | 4.84E-02 | 1.9  |

|              |                |       |          |      |          |      |
|--------------|----------------|-------|----------|------|----------|------|
| NM_013614    | <i>Odc1</i>    | BXD60 | 4.16E-03 | 1.7  | NS       | NS   |
| NM_198673    | <i>Odf3l1</i>  | BXD60 | 3.57E-04 | -1.7 | NS       | NS   |
| NM_146571    | <i>Olf1015</i> | BXD60 | 1.35E-02 | -2.0 | NS       | NS   |
| NM_146323    | <i>Olf1232</i> | BXD60 | 2.91E-03 | -1.9 | NS       | NS   |
| NM_001011853 | <i>Olf1425</i> | BXD60 | 1.54E-02 | -2.1 | NS       | NS   |
| NM_147036    | <i>Olf1283</i> | BXD60 | 3.45E-02 | -1.5 | NS       | NS   |
| NM_146306    | <i>Olf1518</i> | BXD60 | 4.25E-02 | -1.4 | NS       | NS   |
| NM_146361    | <i>Olf1557</i> | BXD60 | NS       | NS   | 3.15E-02 | 1.7  |
| NM_146822    | <i>Olf1640</i> | BXD60 | 3.30E-02 | -1.9 | NS       | NS   |
| NM_013621    | <i>Olf169</i>  | BXD60 | 2.64E-02 | -1.9 | NS       | NS   |
| NM_146864    | <i>Olf1768</i> | BXD60 | 4.92E-02 | -1.7 | NS       | NS   |
| NM_152818    | <i>Osbp2</i>   | BXD60 | 2.73E-02 | 1.3  | NS       | NS   |
| NM_001134791 | <i>Osbpl9</i>  | BXD60 | 7.74E-06 | 1.5  | 8.74E-04 | 1.4  |
| NM_172416    | <i>Ostm1</i>   | BXD60 | 4.81E-03 | 1.6  | NS       | NS   |
| NM_130880    | <i>Otud7a</i>  | BXD60 | NS       | NS   | 3.08E-02 | 1.4  |
| NM_145460    | <i>Oxnad1</i>  | BXD60 | 4.36E-02 | 1.3  | NS       | NS   |
| NM_001008497 | <i>P2ry14</i>  | BXD60 | 2.81E-02 | 1.9  | NS       | NS   |
| NM_011119    | <i>Pa2g4</i>   | BXD60 | 3.65E-02 | -1.3 | NS       | NS   |
| NM_026420    | <i>Paip2</i>   | BXD60 | 1.73E-04 | 1.4  | 3.71E-02 | 1.3  |
| NM_146169    | <i>Paip2b</i>  | BXD60 | 3.67E-02 | 1.4  | NS       | NS   |
| NM_021362    | <i>Pappa</i>   | BXD60 | 1.66E-02 | 1.9  | NS       | NS   |
| NM_028829    | <i>Paqr8</i>   | BXD60 | 9.82E-03 | 1.4  | 1.27E-02 | 1.5  |
| NM_001253690 | <i>Patz1</i>   | BXD60 | 8.11E-03 | 1.6  | NS       | NS   |
| NM_011865    | <i>Pcbp1</i>   | BXD60 | 8.14E-06 | -1.7 | NS       | NS   |
| NM_053133    | <i>Pcdhb8</i>  | BXD60 | 4.31E-02 | -1.6 | NS       | NS   |
| NM_146129    | <i>Pcif1</i>   | BXD60 | NS       | NS   | 1.61E-02 | -1.6 |
| NM_183028    | <i>Pcmt1</i>   | BXD60 | NS       | NS   | 3.38E-02 | 1.3  |
| NM_153594    | <i>Pcmt2</i>   | BXD60 | 1.14E-04 | 2.0  | NS       | NS   |
| NM_025823    | <i>Pcyox1</i>  | BXD60 | 3.07E-02 | 1.4  | NS       | NS   |
| NM_001177980 | <i>Pde4b</i>   | BXD60 | 2.16E-05 | 1.6  | 1.14E-02 | 1.4  |
| NM_001170669 | <i>Pde8b</i>   | BXD60 | 1.95E-02 | 1.7  | NS       | NS   |
| NM_008808    | <i>Pdgfa</i>   | BXD60 | 9.02E-03 | -1.5 | 3.92E-03 | -1.5 |
| NM_027924    | <i>Pdgfd</i>   | BXD60 | 3.99E-02 | 1.9  | NS       | NS   |
| NM_008810    | <i>Pdha1</i>   | BXD60 | 1.67E-02 | 1.5  | NS       | NS   |
| NM_001033222 | <i>Pdzd8</i>   | BXD60 | 3.54E-02 | -1.3 | NS       | NS   |
| NM_023523    | <i>Pecr</i>    | BXD60 | 1.49E-02 | 1.6  | NS       | NS   |
| NM_001159367 | <i>Per1</i>    | BXD60 | 1.68E-03 | 1.7  | NS       | NS   |
| NM_172417    | <i>Perm1</i>   | BXD60 | 3.08E-02 | -1.8 | NS       | NS   |

|              |                 |       |          |      |          |      |
|--------------|-----------------|-------|----------|------|----------|------|
| NM_011072    | <i>Pfn1</i>     | BXD60 | 2.01E-02 | -1.4 | NS       | NS   |
| NM_025700    | <i>Pgm1</i>     | BXD60 | 4.76E-02 | -1.5 | NS       | NS   |
| NM_009343    | <i>Phf1</i>     | BXD60 | NS       | NS   | 1.40E-02 | -1.6 |
| NM_024250    | <i>Phf10</i>    | BXD60 | 3.12E-03 | -1.4 | NS       | NS   |
| NM_174852    | <i>Phf12</i>    | BXD60 | 2.52E-03 | -1.6 | NS       | NS   |
| NM_172705    | <i>Phf13</i>    | BXD60 | NS       | NS   | 3.68E-02 | -1.7 |
| NM_001109690 | <i>Phf21a</i>   | BXD60 | 4.45E-02 | 1.5  | NS       | NS   |
| NM_030064    | <i>Phf23</i>    | BXD60 | NS       | NS   | 2.34E-02 | -1.5 |
| NM_016966    | <i>Phgdh</i>    | BXD60 | 9.03E-05 | 1.8  | NS       | NS   |
| NM_053191    | <i>Pi15</i>     | BXD60 | NS       | NS   | 2.33E-02 | 1.9  |
| NM_001145926 | <i>Pianp</i>    | BXD60 | 3.48E-02 | -1.5 | NS       | NS   |
| NM_001003948 | <i>Pid1</i>     | BXD60 | 1.73E-02 | 1.5  | NS       | NS   |
| NM_001145955 | <i>Pigv</i>     | BXD60 | 3.00E-02 | 1.5  | NS       | NS   |
| NM_178149    | <i>Pik3ip1</i>  | BXD60 | 2.48E-03 | 1.8  | 3.03E-03 | 1.9  |
| NM_001024955 | <i>Pik3r1</i>   | BXD60 | 1.11E-12 | 2.0  | 1.74E-09 | 1.8  |
| NM_028228    | <i>Pinx1</i>    | BXD60 | 4.67E-03 | -1.7 | NS       | NS   |
| NM_177298    | <i>Pisd</i>     | BXD60 | 4.12E-02 | 1.6  | NS       | NS   |
| NM_145823    | <i>Pitpnc1</i>  | BXD60 | 4.11E-02 | 1.2  | NS       | NS   |
| NM_026163    | <i>Pkp2</i>     | BXD60 | 9.35E-03 | 1.9  | NS       | NS   |
| NM_172695    | <i>Plaa</i>     | BXD60 | 4.36E-02 | -1.2 | NS       | NS   |
| NM_008872    | <i>Plat</i>     | BXD60 | 1.59E-02 | 1.6  | 4.53E-02 | 1.6  |
| NM_152813    | <i>Plcd3</i>    | BXD60 | 1.80E-03 | 1.8  | NS       | NS   |
| NM_001081456 | <i>Plcd4</i>    | BXD60 | 1.97E-02 | 1.6  | NS       | NS   |
| NM_008876    | <i>Pld2</i>     | BXD60 | 2.75E-02 | 1.4  | NS       | NS   |
| NM_133942    | <i>Plekha1</i>  | BXD60 | 1.81E-02 | 1.4  | NS       | NS   |
| NM_001033253 | <i>Plekhg1</i>  | BXD60 | 1.93E-08 | 2.5  | 2.53E-03 | 1.8  |
| NM_181073    | <i>Plekhh1</i>  | BXD60 | 3.55E-02 | 1.7  | NS       | NS   |
| NM_013807    | <i>Plk3</i>     | BXD60 | 1.33E-06 | -2.2 | 1.79E-03 | -1.8 |
| NM_026925    | <i>Pnlip</i>    | BXD60 | 2.18E-02 | -1.5 | NS       | NS   |
| NM_175498    | <i>Pnma2</i>    | BXD60 | NS       | NS   | 4.39E-02 | -1.5 |
| NM_008891    | <i>Pnn</i>      | BXD60 | 4.57E-02 | -1.4 | NS       | NS   |
| NM_025443    | <i>Pno1</i>     | BXD60 | 1.95E-02 | -1.5 | NS       | NS   |
| NM_026383    | <i>Pnrc2</i>    | BXD60 | 3.41E-04 | 1.6  | NS       | NS   |
| NM_029037    | <i>Pomk</i>     | BXD60 | 1.95E-02 | 1.5  | NS       | NS   |
| NM_133931    | <i>Pot1a</i>    | BXD60 | 3.73E-02 | 1.4  | NS       | NS   |
| NM_028370    | <i>Pot1b</i>    | BXD60 | 2.99E-02 | 1.7  | NS       | NS   |
| NM_008900    | <i>Pou3f3</i>   | BXD60 | 4.67E-03 | -1.5 | NS       | NS   |
| NM_133249    | <i>Ppargc1b</i> | BXD60 | NS       | NS   | 2.30E-02 | -1.7 |

|              |                  |       |          |      |          |      |
|--------------|------------------|-------|----------|------|----------|------|
| NM_008014    | <i>Ppm1g</i>     | BXD60 | 2.51E-02 | -1.3 | NS       | NS   |
| NM_027242    | <i>Ppp1r35</i>   | BXD60 | NS       | NS   | 1.28E-02 | -1.7 |
| NM_001171004 | <i>Prkd3</i>     | BXD60 | 2.93E-03 | 1.6  | NS       | NS   |
| NM_001252476 | <i>Prmt1</i>     | BXD60 | NS       | NS   | 1.72E-02 | -1.5 |
| NM_001081240 | <i>Prmt10</i>    | BXD60 | 3.75E-02 | 1.4  | NS       | NS   |
| NM_144944    | <i>Prokr2</i>    | BXD60 | 1.72E-02 | -1.7 | NS       | NS   |
| NM_018786    | <i>Prpf40b</i>   | BXD60 | 2.99E-02 | -1.6 | NS       | NS   |
| NM_133701    | <i>Prpf6</i>     | BXD60 | 1.63E-02 | 1.4  | NS       | NS   |
| NM_175022    | <i>Prr12</i>     | BXD60 | 3.08E-02 | -1.5 | NS       | NS   |
| NM_146061    | <i>Prr5</i>      | BXD60 | 1.44E-02 | 1.5  | NS       | NS   |
| NM_177698    | <i>Psd3</i>      | BXD60 | 1.53E-03 | 1.4  | NS       | NS   |
| NM_008945    | <i>Psmb4</i>     | BXD60 | 4.99E-02 | 1.3  | NS       | NS   |
| NM_001282017 | <i>Psmc4</i>     | BXD60 | 3.43E-02 | -1.4 | NS       | NS   |
| NM_134013    | <i>Psme4</i>     | BXD60 | 2.14E-02 | 1.3  | NS       | NS   |
| NM_025682    | <i>Pspc1</i>     | BXD60 | 2.15E-04 | -1.8 | NS       | NS   |
| NM_207232    | <i>Ptpdc1</i>    | BXD60 | 5.54E-03 | 1.8  | NS       | NS   |
| NM_011201    | <i>Ptpn1</i>     | BXD60 | 2.43E-02 | -1.3 | NS       | NS   |
| NM_019933    | <i>Ptpn4</i>     | BXD60 | 3.63E-03 | 1.7  | NS       | NS   |
| NM_025831    | <i>Pxdc1</i>     | BXD60 | 1.80E-05 | 2.0  | NS       | NS   |
| NM_153781    | <i>Pygb</i>      | BXD60 | 4.99E-02 | 1.3  | NS       | NS   |
| NM_001168270 | <i>Qars</i>      | BXD60 | 3.30E-02 | 1.4  | NS       | NS   |
| NM_001024945 | <i>Qsox1</i>     | BXD60 | 9.77E-05 | 1.8  | NS       | NS   |
| NM_001146012 | <i>R3hcc1</i>    | BXD60 | NS       | NS   | 4.13E-02 | -1.5 |
| NM_017382    | <i>Rab11a</i>    | BXD60 | 4.70E-02 | -1.3 | NS       | NS   |
| NM_001033172 | <i>Rab11fip2</i> | BXD60 | 1.74E-02 | 1.3  | NS       | NS   |
| NM_023635    | <i>Rab27a</i>    | BXD60 | 3.82E-02 | 1.4  | NS       | NS   |
| NM_029494    | <i>Rab30</i>     | BXD60 | 2.56E-12 | 2.5  | 6.06E-09 | 2.2  |
| NM_175122    | <i>Rab39b</i>    | BXD60 | 3.31E-03 | 1.3  | NS       | NS   |
| NM_001038621 | <i>Rabgap1l</i>  | BXD60 | 9.59E-06 | 1.5  | 7.46E-04 | 1.4  |
| NM_001277938 | <i>Rad51d</i>    | BXD60 | 1.33E-02 | 1.8  | NS       | NS   |
| NM_019491    | <i>Rala</i>      | BXD60 | 3.32E-03 | -1.6 | NS       | NS   |
| NM_011239    | <i>Ranbp1</i>    | BXD60 | 2.51E-02 | -1.5 | NS       | NS   |
| NM_001099624 | <i>Rapgef2</i>   | BXD60 | 1.26E-10 | 1.9  | 1.75E-09 | 1.9  |
| NM_001252494 | <i>Rapgef6</i>   | BXD60 | 1.09E-08 | 2.3  | 6.66E-08 | 2.3  |
| NM_001176528 | <i>Rara</i>      | BXD60 | 1.53E-03 | -1.6 | 5.68E-03 | -1.6 |
| NM_009025    | <i>Rasa3</i>     | BXD60 | 1.33E-02 | -1.5 | 1.29E-02 | -1.6 |
| NM_177644    | <i>Rasal2</i>    | BXD60 | 1.33E-02 | 1.5  | NS       | NS   |
| NM_178045    | <i>Rassf4</i>    | BXD60 | NS       | NS   | 2.04E-02 | 1.7  |



|              |                |       |          |      |          |      |
|--------------|----------------|-------|----------|------|----------|------|
| NM_015754    | <i>Rbbp9</i>   | BXD60 | 3.75E-02 | 1.4  | NS       | NS   |
| NM_021477    | <i>Rbfox1</i>  | BXD60 | 2.05E-02 | 1.3  | NS       | NS   |
| NM_001110827 | <i>Rbfox2</i>  | BXD60 | 1.40E-02 | 1.3  | 2.94E-02 | 1.3  |
| NM_028234    | <i>Rbm33</i>   | BXD60 | 6.95E-04 | 1.5  | 1.12E-03 | 1.6  |
| NM_001290123 | <i>Rbm4</i>    | BXD60 | 2.80E-02 | 1.5  | NS       | NS   |
| NM_153405    | <i>Rbm45</i>   | BXD60 | 4.79E-02 | -1.4 | 3.75E-02 | -1.5 |
| NM_001024952 | <i>Rc3h1</i>   | BXD60 | 4.31E-02 | 1.3  | NS       | NS   |
| NM_001100591 | <i>Rc3h2</i>   | BXD60 | 2.10E-02 | 1.3  | NS       | NS   |
| NM_001081549 | <i>Rcan1</i>   | BXD60 | 5.72E-06 | 1.7  | NS       | NS   |
| NM_027764    | <i>Rcbtb1</i>  | BXD60 | 3.82E-02 | 1.5  | NS       | NS   |
| NM_030017    | <i>Rdh12</i>   | BXD60 | 2.07E-02 | 1.7  | NS       | NS   |
| NM_001204931 | <i>Reep6</i>   | BXD60 | NS       | NS   | 1.39E-02 | -1.7 |
| NM_011259    | <i>Reg3a</i>   | BXD60 | 3.14E-02 | -1.6 | NS       | NS   |
| NM_028713    | <i>Rftn2</i>   | BXD60 | 2.58E-02 | 1.5  | NS       | NS   |
| NM_016846    | <i>Rgl1</i>    | BXD60 | 1.52E-02 | 1.4  | NS       | NS   |
| NM_009062    | <i>Rgs4</i>    | BXD60 | NS       | NS   | 2.34E-02 | 1.5  |
| NM_001282061 | <i>Rgs6</i>    | BXD60 | 6.76E-03 | 1.6  | NS       | NS   |
| NM_001199003 | <i>Rgs7</i>    | BXD60 | 4.40E-02 | -1.3 | NS       | NS   |
| NM_007483    | <i>Rhob</i>    | BXD60 | 1.78E-02 | 1.4  | NS       | NS   |
| NM_153514    | <i>Rhobtb2</i> | BXD60 | NS       | NS   | 5.00E-02 | -1.4 |
| NM_011882    | <i>Rnasel</i>  | BXD60 | 4.50E-02 | 1.5  | NS       | NS   |
| NM_172612    | <i>Rnd1</i>    | BXD60 | 4.79E-02 | -1.5 | 3.60E-02 | -1.5 |
| NM_009543    | <i>Rnf103</i>  | BXD60 | 3.30E-02 | 1.3  | NS       | NS   |
| NM_144528    | <i>Rnf126</i>  | BXD60 | 1.67E-02 | -1.3 | NS       | NS   |
| NM_001170643 | <i>Rnf144b</i> | BXD60 | 3.42E-02 | 1.7  | NS       | NS   |
| NM_001166553 | <i>Rnf145</i>  | BXD60 | 1.89E-04 | -1.5 | 1.05E-05 | -1.7 |
| NM_001033135 | <i>Rnf149</i>  | BXD60 | 1.51E-02 | 1.9  | NS       | NS   |
| NM_194346    | <i>Rnf31</i>   | BXD60 | 4.79E-02 | -1.5 | NS       | NS   |
| NM_001164767 | <i>Robo3</i>   | BXD60 | 2.01E-02 | -1.6 | NS       | NS   |
| NM_146246    | <i>Rp1l1</i>   | BXD60 | 1.95E-02 | -1.6 | NS       | NS   |
| NM_133982    | <i>Rpp25</i>   | BXD60 | 1.97E-02 | -1.6 | NS       | NS   |
| NM_001033212 | <i>Rprml</i>   | BXD60 | 9.82E-03 | -1.7 | NS       | NS   |
| NM_146244    | <i>Rps6kl1</i> | BXD60 | 8.94E-06 | 2.1  | 2.43E-02 | 1.6  |
| NM_027491    | <i>Rragd</i>   | BXD60 | 8.48E-03 | 1.4  | NS       | NS   |
| NM_001005525 | <i>Rsrc2</i>   | BXD60 | 7.44E-03 | -1.4 | NS       | NS   |
| NM_145422    | <i>Rtcb</i>    | BXD60 | 2.12E-02 | 1.5  | NS       | NS   |
| NM_001111026 | <i>Runx1t1</i> | BXD60 | 4.76E-02 | -1.4 | NS       | NS   |
| NM_001042607 | <i>Ryk</i>     | BXD60 | 1.39E-02 | 1.3  | NS       | NS   |

|              |                 |       |          |      |          |      |
|--------------|-----------------|-------|----------|------|----------|------|
| NM_007901    | <i>S1pr1</i>    | BXD60 | 2.72E-02 | 1.6  | NS       | NS   |
| NM_026283    | <i>Samd8</i>    | BXD60 | 1.20E-04 | 1.5  | NS       | NS   |
| NM_175155    | <i>Sash1</i>    | BXD60 | 2.13E-02 | 1.5  | NS       | NS   |
| NM_009129    | <i>Scg2</i>     | BXD60 | 3.73E-03 | 1.4  | NS       | NS   |
| NM_011324    | <i>Scnn1a</i>   | BXD60 | 6.30E-03 | 2.1  | NS       | NS   |
| NM_001271472 | <i>Scube1</i>   | BXD60 | 3.33E-02 | -1.6 | NS       | NS   |
| NM_011521    | <i>Sdc4</i>     | BXD60 | 2.14E-04 | 2.4  | 3.39E-02 | 1.8  |
| NM_019951    | <i>Sec11a</i>   | BXD60 | 9.91E-03 | 1.4  | NS       | NS   |
| NM_146013    | <i>Sec14l4</i>  | BXD60 | 6.26E-03 | 2.0  | NS       | NS   |
| NM_009154    | <i>Sema5a</i>   | BXD60 | 2.40E-02 | 1.5  | NS       | NS   |
| NM_175400    | <i>Sephs1</i>   | BXD60 | 8.38E-03 | 1.7  | NS       | NS   |
| NM_001253386 | <i>Serinc2</i>  | BXD60 | 2.68E-02 | 1.6  | NS       | NS   |
| NM_172588    | <i>Serinc5</i>  | BXD60 | 5.31E-05 | 1.8  | NS       | NS   |
| NM_001013370 | <i>Sesn1</i>    | BXD60 | 2.05E-03 | 1.6  | NS       | NS   |
| NM_030261    | <i>Sesn3</i>    | BXD60 | 1.18E-04 | 1.6  | 3.00E-03 | 1.5  |
| NM_001204875 | <i>Set</i>      | BXD60 | 2.43E-02 | -1.3 | NS       | NS   |
| NM_001040398 | <i>Setd1b</i>   | BXD60 | NS       | NS   | 3.19E-03 | -1.7 |
| NM_080793    | <i>Setd7</i>    | BXD60 | 3.70E-02 | 1.6  | NS       | NS   |
| NM_031179    | <i>Sf3b1</i>    | BXD60 | 1.96E-02 | -1.3 | NS       | NS   |
| NM_026377    | <i>Sfr1</i>     | BXD60 | 1.29E-02 | -1.3 | NS       | NS   |
| NM_016687    | <i>Sfrp4</i>    | BXD60 | 1.74E-02 | 2.0  | NS       | NS   |
| NM_145512    | <i>Sft2d2</i>   | BXD60 | 2.81E-02 | 1.6  | NS       | NS   |
| NM_001168525 | <i>Sgms1</i>    | BXD60 | 4.99E-03 | 2.0  | NS       | NS   |
| NM_001282037 | <i>Sh3glb1</i>  | BXD60 | 3.48E-02 | -1.2 | NS       | NS   |
| NM_001168505 | <i>Shoc2</i>    | BXD60 | 4.87E-02 | -1.2 | NS       | NS   |
| NM_001289668 | <i>Sidt2</i>    | BXD60 | 8.34E-03 | 1.6  | NS       | NS   |
| NM_001286538 | <i>Sigmar1</i>  | BXD60 | NS       | NS   | 3.92E-03 | -1.5 |
| NM_010831    | <i>Sik1</i>     | BXD60 | 4.96E-02 | -1.4 | NS       | NS   |
| NM_001110350 | <i>Sin3a</i>    | BXD60 | NS       | NS   | 4.24E-03 | -1.5 |
| NM_001167983 | <i>Sipa1l1</i>  | BXD60 | NS       | NS   | 2.18E-02 | 1.4  |
| NM_029612    | <i>Slamf9</i>   | BXD60 | NS       | NS   | 7.80E-03 | 2.2  |
| NM_001146161 | <i>Slc11a2</i>  | BXD60 | 3.23E-02 | -1.5 | NS       | NS   |
| NM_023044    | <i>Slc15a3</i>  | BXD60 | 1.64E-02 | 1.8  | NS       | NS   |
| NM_001114332 | <i>Slc16a10</i> | BXD60 | 4.31E-02 | 1.6  | NS       | NS   |
| NM_027921    | <i>Slc16a14</i> | BXD60 | 2.33E-03 | 1.6  | 1.30E-02 | 1.5  |
| NM_001029842 | <i>Slc16a6</i>  | BXD60 | 4.96E-02 | 1.7  | 2.04E-02 | 2.0  |
| NM_001199271 | <i>Slc19a1</i>  | BXD60 | 1.23E-02 | 1.5  | NS       | NS   |
| NM_001159593 | <i>Slc20a1</i>  | BXD60 | 6.85E-03 | -1.4 | NS       | NS   |

|              |                  |       |          |      |          |      |
|--------------|------------------|-------|----------|------|----------|------|
| NM_001110240 | <i>Slc24a2</i>   | BXD60 | 1.67E-02 | 1.6  | NS       | NS   |
| NM_172152    | <i>Slc24a4</i>   | BXD60 | 2.76E-02 | 1.6  | NS       | NS   |
| NM_138756    | <i>Slc25a36</i>  | BXD60 | 6.68E-03 | 1.4  | NS       | NS   |
| NM_011977    | <i>Slc27a1</i>   | BXD60 | 2.05E-03 | 1.5  | NS       | NS   |
| NM_007854    | <i>Slc29a2</i>   | BXD60 | NS       | NS   | 4.03E-02 | -1.7 |
| NM_011400    | <i>Slc2a1</i>    | BXD60 | 9.59E-04 | 1.8  | 1.67E-02 | 1.7  |
| NM_011401    | <i>Slc2a3</i>    | BXD60 | 3.00E-02 | 1.4  | NS       | NS   |
| NM_019741    | <i>Slc2a5</i>    | BXD60 | NS       | NS   | 5.68E-03 | 1.9  |
| NM_021435    | <i>Slc35b4</i>   | BXD60 | 2.05E-04 | 1.6  | NS       | NS   |
| NM_028787    | <i>Slc35f5</i>   | BXD60 | 2.05E-02 | 1.3  | NS       | NS   |
| NM_001164798 | <i>Slc38a10</i>  | BXD60 | 4.76E-02 | 1.3  | NS       | NS   |
| NM_175121    | <i>Slc38a2</i>   | BXD60 | 3.79E-02 | 1.3  | NS       | NS   |
| NM_134135    | <i>Slc39a3</i>   | BXD60 | 3.86E-02 | 1.5  | NS       | NS   |
| NM_177388    | <i>Slc41a2</i>   | BXD60 | 3.25E-02 | 1.4  | NS       | NS   |
| NM_001199283 | <i>Slc43a2</i>   | BXD60 | 7.40E-04 | 1.7  | NS       | NS   |
| NM_021398    | <i>Slc43a3</i>   | BXD60 | 7.84E-03 | 1.7  | NS       | NS   |
| NM_001199186 | <i>Slc44a2</i>   | BXD60 | 1.07E-02 | 1.5  | NS       | NS   |
| NM_001081263 | <i>Slc44a5</i>   | BXD60 | 3.20E-07 | 2.0  | 2.70E-05 | 1.8  |
| NM_172890    | <i>Slc6a11</i>   | BXD60 | 1.10E-02 | 1.3  | NS       | NS   |
| NM_012030    | <i>Slc9a3r1</i>  | BXD60 | 4.33E-02 | -1.4 | NS       | NS   |
| NM_001038643 | <i>Slco3a1</i>   | BXD60 | 4.90E-02 | -1.3 | 1.03E-02 | -1.5 |
| NM_172841    | <i>Slco5a1</i>   | BXD60 | 2.06E-02 | 1.6  | NS       | NS   |
| NM_001252481 | <i>Smad2</i>     | BXD60 | 2.82E-03 | -1.6 | 1.68E-02 | -1.5 |
| NM_008540    | <i>Smad4</i>     | BXD60 | 8.05E-03 | 1.3  | NS       | NS   |
| NM_031842    | <i>Smardc1</i>   | BXD60 | 1.64E-03 | -1.4 | NS       | NS   |
| NM_001031814 | <i>Smg1</i>      | BXD60 | 1.59E-02 | 1.6  | NS       | NS   |
| NR_028086    | <i>Smim10l2a</i> | BXD60 | 3.68E-02 | 1.7  | NS       | NS   |
| NM_133697    | <i>Smim14</i>    | BXD60 | 3.78E-02 | 1.2  | 3.15E-02 | 1.3  |
| NM_134133    | <i>Smim3</i>     | BXD60 | NS       | NS   | 1.68E-05 | 3.0  |
| NM_001252629 | <i>Smn1</i>      | BXD60 | 2.68E-02 | -1.5 | NS       | NS   |
| NM_001177833 | <i>Smox</i>      | BXD60 | 1.36E-02 | 1.5  | NS       | NS   |
| NM_183316    | <i>Snape5</i>    | BXD60 | 4.99E-02 | 1.4  | NS       | NS   |
| NM_001199151 | <i>Snaip</i>     | BXD60 | 3.14E-02 | 1.4  | NS       | NS   |
| NM_027671    | <i>Sntg1</i>     | BXD60 | 2.70E-02 | 1.5  | NS       | NS   |
| NM_175483    | <i>Snx33</i>     | BXD60 | 3.62E-02 | 1.7  | NS       | NS   |
| NM_183173    | <i>Sowaha</i>    | BXD60 | NS       | NS   | 1.63E-02 | 1.7  |
| NM_001025428 | <i>Spag9</i>     | BXD60 | 2.64E-02 | 1.3  | 9.96E-03 | 1.4  |
| NM_170756    | <i>Spata2</i>    | BXD60 | 4.36E-02 | 1.5  | NS       | NS   |

|              |                   |       |          |      |          |      |
|--------------|-------------------|-------|----------|------|----------|------|
| NM_001164566 | <i>Spats2l</i>    | BXD60 | 9.78E-03 | -1.5 | NS       | NS   |
| NM_172430    | <i>Sphkap</i>     | BXD60 | 3.49E-03 | 1.5  | NS       | NS   |
| NM_023220    | <i>Sppl2a</i>     | BXD60 | 1.95E-02 | 1.4  | NS       | NS   |
| NM_182927    | <i>Spred3</i>     | BXD60 | 1.70E-03 | -2.0 | 5.93E-03 | -2.0 |
| NM_011898    | <i>Spry4</i>      | BXD60 | 1.74E-04 | -2.1 | 3.91E-06 | -2.5 |
| NM_009270    | <i>Sqle</i>       | BXD60 | 9.36E-04 | -1.6 | 3.84E-02 | -1.4 |
| NM_020493    | <i>Srf</i>        | BXD60 | NS       | NS   | 4.01E-02 | -1.6 |
| NM_080448    | <i>Srgap3</i>     | BXD60 | 3.09E-02 | 1.3  | NS       | NS   |
| NM_009272    | <i>Srm</i>        | BXD60 | 2.79E-03 | -1.4 | 1.46E-02 | -1.4 |
| NM_001109909 | <i>Srrt</i>       | BXD60 | NS       | NS   | 1.54E-02 | -1.5 |
| NM_011358    | <i>Srsf2</i>      | BXD60 | 9.03E-05 | -1.6 | 1.54E-02 | -1.4 |
| NM_013663    | <i>Srsf3</i>      | BXD60 | 4.09E-02 | -1.4 | NS       | NS   |
| NM_001195485 | <i>Srsf7</i>      | BXD60 | 7.18E-04 | -1.8 | 4.64E-04 | -1.9 |
| NM_178750    | <i>Ss18l1</i>     | BXD60 | 8.63E-03 | -1.4 | NS       | NS   |
| NM_001110145 | <i>Ssb</i>        | BXD60 | 4.67E-02 | -1.3 | NS       | NS   |
| NM_026155    | <i>Ssr3</i>       | BXD60 | 1.64E-02 | 1.3  | NS       | NS   |
| NM_012028    | <i>St6galnac5</i> | BXD60 | 1.50E-03 | -1.4 | NS       | NS   |
| NM_011374    | <i>St8sia1</i>    | BXD60 | 8.05E-03 | 1.4  | 6.59E-04 | 1.6  |
| NM_019990    | <i>Stard10</i>    | BXD60 | 3.80E-02 | 1.5  | NS       | NS   |
| NM_133774    | <i>Stard4</i>     | BXD60 | 4.61E-06 | -2.2 | 1.12E-02 | -1.7 |
| NM_001113563 | <i>Stat5b</i>     | BXD60 | 1.81E-02 | 1.5  | NS       | NS   |
| NM_009287    | <i>Stim1</i>      | BXD60 | 2.43E-02 | 1.6  | NS       | NS   |
| NM_013515    | <i>Stom</i>       | BXD60 | 1.95E-02 | 1.9  | NS       | NS   |
| NM_175367    | <i>Ston2</i>      | BXD60 | 8.80E-03 | 1.5  | NS       | NS   |
| NM_153563    | <i>Strip1</i>     | BXD60 | NS       | NS   | 2.34E-02 | -1.3 |
| NM_001102423 | <i>Stx16</i>      | BXD60 | 3.98E-03 | 1.5  | NS       | NS   |
| NM_011505    | <i>Stxbp4</i>     | BXD60 | 1.32E-02 | 1.6  | NS       | NS   |
| NM_001114611 | <i>Stxbp5l</i>    | BXD60 | 2.84E-03 | 1.5  | NS       | NS   |
| NM_019995    | <i>Supt20</i>     | BXD60 | 1.74E-02 | -1.5 | NS       | NS   |
| NM_009296    | <i>Supt4a</i>     | BXD60 | 2.81E-02 | 1.4  | NS       | NS   |
| NM_144796    | <i>Susd4</i>      | BXD60 | 2.95E-02 | 1.4  | NS       | NS   |
| NM_001242419 | <i>Susd6</i>      | BXD60 | 2.72E-02 | 1.5  | NS       | NS   |
| NM_027832    | <i>Sval1</i>      | BXD60 | 1.51E-02 | -2.5 | NS       | NS   |
| NM_013679    | <i>Svs6</i>       | BXD60 | NS       | NS   | 4.12E-02 | 2.0  |
| NM_001164495 | <i>Syn3</i>       | BXD60 | NS       | NS   | 1.84E-02 | 1.4  |
| NM_153399    | <i>Syne1</i>      | BXD60 | 3.49E-02 | 1.4  | 1.22E-03 | 1.7  |
| NM_001005510 | <i>Syne2</i>      | BXD60 | 1.62E-02 | 1.5  | NS       | NS   |
| NM_194341    | <i>Synrg</i>      | BXD60 | 2.81E-02 | 1.5  | NS       | NS   |

|              |                  |       |          |      |          |      |
|--------------|------------------|-------|----------|------|----------|------|
| NM_001040085 | <i>Sytl2</i>     | BXD60 | 9.95E-04 | 2.0  | 2.09E-04 | 2.2  |
| NM_001161730 | <i>Tap1</i>      | BXD60 | 4.76E-02 | 1.8  | NS       | NS   |
| NM_029745    | <i>Tbc1d9b</i>   | BXD60 | 4.96E-02 | 1.4  | NS       | NS   |
| NM_011553    | <i>Tcp10a</i>    | BXD60 | 3.30E-02 | -1.7 | NS       | NS   |
| NM_146008    | <i>Tcp11l2</i>   | BXD60 | 1.87E-02 | 1.6  | NS       | NS   |
| NM_028354    | <i>Tdp1</i>      | BXD60 | 2.96E-02 | 1.3  | NS       | NS   |
| NM_026099    | <i>Tex43</i>     | BXD60 | 4.58E-02 | -1.5 | NS       | NS   |
| NM_001184706 | <i>Tfdp2</i>     | BXD60 | 9.43E-03 | 1.6  | NS       | NS   |
| NM_001289550 | <i>Tgfb1i1</i>   | BXD60 | 2.62E-02 | -1.6 | NS       | NS   |
| NM_009368    | <i>Tgfb3</i>     | BXD60 | 3.78E-02 | 1.9  | NS       | NS   |
| NM_009381    | <i>Thrsp</i>     | BXD60 | 9.75E-05 | 2.1  | 3.92E-03 | 1.9  |
| NM_174989    | <i>Ticam1</i>    | BXD60 | 7.35E-04 | 2.2  | NS       | NS   |
| NM_001081145 | <i>Tigd2</i>     | BXD60 | 5.08E-03 | 1.5  | 1.23E-02 | 1.5  |
| NM_001136082 | <i>Timeless</i>  | BXD60 | 4.87E-02 | -1.6 | NS       | NS   |
| NM_172664    | <i>Tlk1</i>      | BXD60 | 4.25E-02 | -1.3 | NS       | NS   |
| NM_133352    | <i>Tm9sf3</i>    | BXD60 | 2.35E-02 | 1.3  | NS       | NS   |
| NM_172476    | <i>Tmc7</i>      | BXD60 | 2.38E-02 | 1.4  | NS       | NS   |
| NM_177412    | <i>Tmcc1</i>     | BXD60 | 8.94E-03 | 1.4  | 9.87E-03 | 1.4  |
| NM_025360    | <i>Tmed3</i>     | BXD60 | 4.25E-02 | 1.7  | NS       | NS   |
| NM_134142    | <i>Tmem109</i>   | BXD60 | 4.89E-02 | -1.8 | NS       | NS   |
| NM_027495    | <i>Tmem144</i>   | BXD60 | 1.59E-02 | 1.6  | NS       | NS   |
| NM_175106    | <i>Tmem177</i>   | BXD60 | NS       | NS   | 4.76E-02 | 1.7  |
| NM_001253817 | <i>Tmem184b</i>  | BXD60 | 2.93E-02 | 1.4  | NS       | NS   |
| NM_001113211 | <i>Tmem194</i>   | BXD60 | 3.30E-02 | 1.6  | NS       | NS   |
| NM_001160385 | <i>Tmem196</i>   | BXD60 | 3.44E-04 | 2.0  | NS       | NS   |
| NM_177056    | <i>Tmem198</i>   | BXD60 | 9.61E-03 | 1.6  | NS       | NS   |
| NM_144525    | <i>Tmem214</i>   | BXD60 | 2.35E-02 | -1.4 | NS       | NS   |
| NM_025667    | <i>Tmem222</i>   | BXD60 | 5.95E-03 | 1.5  | NS       | NS   |
| NM_001033321 | <i>Tmem231</i>   | BXD60 | 7.79E-03 | 1.6  | NS       | NS   |
| NM_027935    | <i>Tmem50a</i>   | BXD60 | 3.68E-02 | 1.3  | NS       | NS   |
| NM_001081186 | <i>Tmem52b</i>   | BXD60 | 4.82E-02 | -1.5 | NS       | NS   |
| NM_021793    | <i>Tmem8</i>     | BXD60 | 3.83E-03 | 1.9  | NS       | NS   |
| NM_133706    | <i>Tmem97</i>    | BXD60 | NS       | NS   | 5.79E-03 | -1.8 |
| NM_011607    | <i>Tnc</i>       | BXD60 | 1.47E-02 | -1.5 | NS       | NS   |
| NM_001161746 | <i>Tnfrsf12a</i> | BXD60 | NS       | NS   | 5.68E-03 | 1.9  |
| NM_001048267 | <i>Tnpol</i>     | BXD60 | 5.60E-06 | 1.7  | 3.45E-02 | 1.4  |
| NM_144812    | <i>Tnrc6b</i>    | BXD60 | 6.06E-03 | 1.5  | 4.03E-02 | 1.5  |
| NM_001109748 | <i>Tomm40</i>    | BXD60 | NS       | NS   | 2.22E-02 | -1.4 |

|              |                  |       |          |      |          |      |
|--------------|------------------|-------|----------|------|----------|------|
| NM_001160180 | <i>Tor1aip2</i>  | BXD60 | 3.79E-02 | 1.3  | NS       | NS   |
| NM_001170488 | <i>Tprkb</i>     | BXD60 | 5.03E-03 | 1.6  | 4.19E-02 | 1.5  |
| NM_198102    | <i>Tra2a</i>     | BXD60 | 4.20E-02 | -1.4 | NS       | NS   |
| NM_009186    | <i>Tra2b</i>     | BXD60 | 4.25E-02 | -1.3 | NS       | NS   |
| NM_001163470 | <i>Trafd1</i>    | BXD60 | NS       | NS   | 4.81E-02 | 1.3  |
| NM_001014398 | <i>Trcg1</i>     | BXD60 | 6.95E-04 | -1.8 | NS       | NS   |
| NM_009054    | <i>Trim27</i>    | BXD60 | 4.89E-02 | -1.4 | NS       | NS   |
| NM_178110    | <i>Trim62</i>    | BXD60 | 2.77E-03 | -1.6 | 4.26E-02 | -1.5 |
| NM_001127233 | <i>Trp53</i>     | BXD60 | NS       | NS   | 1.65E-02 | -1.5 |
| NM_173378    | <i>Trp53bp2</i>  | BXD60 | 3.84E-02 | 1.5  | NS       | NS   |
| NM_001199105 | <i>Trp53inp1</i> | BXD60 | 2.48E-04 | 2.2  | NS       | NS   |
| NM_011643    | <i>Trpc1</i>     | BXD60 | 1.89E-02 | 1.4  | NS       | NS   |
| NM_032000    | <i>Trps1</i>     | BXD60 | 5.88E-03 | 1.5  | NS       | NS   |
| NM_001289575 | <i>Tsc1</i>      | BXD60 | 9.50E-03 | 1.6  | NS       | NS   |
| NM_001077364 | <i>Tsc22d3</i>   | BXD60 | 2.35E-02 | 1.6  | NS       | NS   |
| NM_016909    | <i>Tsnax</i>     | BXD60 | 3.88E-02 | -1.3 | 3.18E-02 | -1.3 |
| NM_173007    | <i>Tspan12</i>   | BXD60 | 3.52E-02 | 1.3  | NS       | NS   |
| NM_197996    | <i>Tspan15</i>   | BXD60 | 2.99E-03 | 1.7  | NS       | NS   |
| NM_019793    | <i>Tspan3</i>    | BXD60 | 2.79E-02 | 1.3  | NS       | NS   |
| NM_025982    | <i>Tspan31</i>   | BXD60 | 4.82E-03 | 1.3  | NS       | NS   |
| NM_146173    | <i>Tspan33</i>   | BXD60 | 2.76E-02 | 1.8  | NS       | NS   |
| NM_019634    | <i>Tspan7</i>    | BXD60 | 2.32E-02 | 1.2  | NS       | NS   |
| NM_145607    | <i>Ttc13</i>     | BXD60 | 3.91E-02 | -1.3 | NS       | NS   |
| NM_028341    | <i>Ttc39c</i>    | BXD60 | 4.58E-02 | 1.6  | NS       | NS   |
| NM_021885    | <i>Tub</i>       | BXD60 | 3.29E-02 | 1.3  | NS       | NS   |
| NM_146116    | <i>Tubb4b</i>    | BXD60 | NS       | NS   | 3.96E-03 | -1.5 |
| NM_001009935 | <i>Txnip</i>     | BXD60 | 2.11E-05 | 3.3  | 1.88E-04 | 3.1  |
| NM_001015876 | <i>Tyw1</i>      | BXD60 | 6.26E-03 | 1.7  | NS       | NS   |
| NM_133806    | <i>Uap1</i>      | BXD60 | 2.08E-02 | -1.3 | NS       | NS   |
| NM_176860    | <i>Ubash3b</i>   | BXD60 | 5.03E-03 | -1.7 | NS       | NS   |
| NM_145420    | <i>Ube2d1</i>    | BXD60 | 4.34E-02 | -1.2 | NS       | NS   |
| NM_001169576 | <i>Ube2h</i>     | BXD60 | 1.59E-02 | 1.4  | 1.68E-05 | 1.7  |
| NM_011908    | <i>Ubl3</i>      | BXD60 | 3.08E-02 | 1.3  | NS       | NS   |
| NM_001083319 | <i>Ubp1</i>      | BXD60 | NS       | NS   | 4.83E-02 | -1.3 |
| NM_001177374 | <i>Ubr2</i>      | BXD60 | 3.65E-02 | 1.4  | NS       | NS   |
| NM_030724    | <i>Uck2</i>      | BXD60 | 2.49E-03 | -1.4 | 3.46E-02 | -1.3 |
| NM_026194    | <i>Ufl1</i>      | BXD60 | 4.66E-02 | 1.3  | NS       | NS   |
| NM_013881    | <i>Ulk2</i>      | BXD60 | 1.25E-02 | 1.3  | NS       | NS   |

|              |                |       |          |      |          |      |
|--------------|----------------|-------|----------|------|----------|------|
| NM_175309    | <i>Upk3b</i>   | BXD60 | 4.65E-02 | -1.5 | NS       | NS   |
| NM_009462    | <i>Usp10</i>   | BXD60 | NS       | NS   | 2.59E-02 | -1.3 |
| NM_144937    | <i>Usp3</i>    | BXD60 | 3.25E-02 | 1.4  | NS       | NS   |
| NM_152825    | <i>Usp45</i>   | BXD60 | 4.92E-02 | 1.5  | NS       | NS   |
| NM_030180    | <i>Usp54</i>   | BXD60 | 4.18E-04 | 1.9  | NS       | NS   |
| NM_001033236 | <i>Vcpkmt</i>  | BXD60 | 1.57E-02 | 1.5  | NS       | NS   |
| NM_001025250 | <i>Vegfa</i>   | BXD60 | 1.76E-03 | -1.8 | NS       | NS   |
| NM_001039385 | <i>Vgf</i>     | BXD60 | 1.11E-03 | -2.2 | 7.46E-04 | -2.4 |
| NM_177151    | <i>Vps13b</i>  | BXD60 | 8.35E-03 | 1.5  | NS       | NS   |
| NM_029929    | <i>Vps33a</i>  | BXD60 | 3.82E-02 | 1.3  | NS       | NS   |
| NM_145967    | <i>Vstm2a</i>  | BXD60 | 1.59E-02 | -1.3 | 3.28E-02 | -1.3 |
| NM_016800    | <i>Vti1b</i>   | BXD60 | 3.22E-02 | -1.3 | NS       | NS   |
| NM_001177812 | <i>Wbp1l</i>   | BXD60 | 1.11E-02 | 1.3  | 2.29E-02 | 1.3  |
| NM_153391    | <i>Wdr19</i>   | BXD60 | 1.54E-02 | 1.5  | NS       | NS   |
| NM_173741    | <i>Wdr24</i>   | BXD60 | 4.31E-02 | 1.4  | NS       | NS   |
| NM_172372    | <i>Wdr45</i>   | BXD60 | 8.02E-04 | 1.9  | NS       | NS   |
| NM_134139    | <i>Wdr74</i>   | BXD60 | NS       | NS   | 1.40E-02 | -1.5 |
| NM_001159636 | <i>Wdsub1</i>  | BXD60 | 6.85E-03 | 1.7  | NS       | NS   |
| NM_178398    | <i>Wipi2</i>   | BXD60 | 3.11E-02 | 1.3  | NS       | NS   |
| NM_011728    | <i>Xpa</i>     | BXD60 | 1.96E-02 | 1.6  | NS       | NS   |
| NM_011916    | <i>Xrn1</i>    | BXD60 | 1.33E-02 | 1.4  | NS       | NS   |
| NM_198626    | <i>Xxylt1</i>  | BXD60 | NS       | NS   | 4.36E-02 | -1.6 |
| NM_207633    | <i>Yipf6</i>   | BXD60 | 6.75E-04 | 1.5  | NS       | NS   |
| NM_001005342 | <i>Ypel4</i>   | BXD60 | 7.58E-07 | 3.3  | 4.19E-03 | 2.2  |
| NM_027166    | <i>Ypel5</i>   | BXD60 | 2.26E-06 | 1.7  | 3.17E-05 | 1.6  |
| NM_028106    | <i>Zbed3</i>   | BXD60 | 7.48E-04 | 1.6  | NS       | NS   |
| NM_001033324 | <i>Zbtb16</i>  | BXD60 | 4.84E-02 | 1.6  | 3.71E-02 | 1.8  |
| NM_175537    | <i>Zbtb38</i>  | BXD60 | 3.11E-02 | 1.3  | NS       | NS   |
| NM_001115130 | <i>Zbtb44</i>  | BXD60 | 4.96E-02 | 1.3  | 4.60E-02 | 1.3  |
| NM_173181    | <i>Zc2hc1a</i> | BXD60 | 1.47E-03 | -1.5 | NS       | NS   |
| NM_178404    | <i>Zc3h6</i>   | BXD60 | 4.54E-02 | 1.4  | NS       | NS   |
| NM_145931    | <i>Zc3h7a</i>  | BXD60 | 2.13E-02 | 1.5  | NS       | NS   |
| NM_001003916 | <i>Zc4h2</i>   | BXD60 | 4.67E-02 | 1.4  | NS       | NS   |
| NM_001033795 | <i>Zcchc16</i> | BXD60 | 3.95E-02 | 1.6  | NS       | NS   |
| NM_001101433 | <i>Zcchc24</i> | BXD60 | 2.81E-02 | 1.5  | NS       | NS   |
| NM_199309    | <i>Zdhhc19</i> | BXD60 | 1.18E-02 | -1.7 | NS       | NS   |
| NM_001159905 | <i>Zfand2b</i> | BXD60 | 2.69E-02 | 2.0  | NS       | NS   |
| NM_011747    | <i>Zfp13</i>   | BXD60 | 6.56E-03 | 1.5  | NS       | NS   |

|              |                |       |          |      |          |      |
|--------------|----------------|-------|----------|------|----------|------|
| NM_001081217 | <i>Zfp174</i>  | BXD60 | 3.62E-02 | 1.5  | NS       | NS   |
| NM_001113399 | <i>Zfp385b</i> | BXD60 | 3.82E-02 | 1.4  | NS       | NS   |
| NM_001110309 | <i>Zfp426</i>  | BXD60 | 1.54E-02 | 1.4  | 4.02E-02 | 1.4  |
| NM_009557    | <i>Zfp46</i>   | BXD60 | 3.30E-02 | 1.4  | NS       | NS   |
| NM_207255    | <i>Zfp532</i>  | BXD60 | 1.27E-03 | 1.5  | NS       | NS   |
| NM_183149    | <i>Zfp598</i>  | BXD60 | 9.82E-03 | -1.6 | NS       | NS   |
| NM_001005425 | <i>Zfp663</i>  | BXD60 | 1.54E-02 | 2.3  | NS       | NS   |
| NM_001289690 | <i>Zfp740</i>  | BXD60 | 3.68E-02 | 1.5  | NS       | NS   |
| NM_001267583 | <i>Zfp811</i>  | BXD60 | 2.77E-03 | 1.6  | 1.93E-03 | 1.7  |
| NM_178417    | <i>Zfp867</i>  | BXD60 | 3.41E-03 | 1.7  | NS       | NS   |
| NM_177712    | <i>Zfp874a</i> | BXD60 | NS       | NS   | 3.08E-02 | 1.7  |
| NM_001076791 | <i>Zfp874b</i> | BXD60 | 4.73E-02 | 1.5  | NS       | NS   |
| NM_011763    | <i>Zfp9</i>    | BXD60 | 1.24E-02 | 1.5  | NS       | NS   |
| NM_145563    | <i>Zfp932</i>  | BXD60 | 2.29E-04 | 1.5  | NS       | NS   |
| NM_001042438 | <i>Zhx1</i>    | BXD60 | 1.53E-03 | 1.4  | NS       | NS   |
| NM_177263    | <i>Zhx3</i>    | BXD60 | 1.17E-03 | 1.8  | NS       | NS   |
| NM_026015    | <i>Zmat5</i>   | BXD60 | 3.08E-02 | 1.6  | NS       | NS   |
| NM_001252584 | <i>Zmynd8</i>  | BXD60 | NS       | NS   | 1.37E-02 | 1.6  |
| NM_023162    | <i>Znrd1</i>   | BXD60 | 9.91E-03 | 1.4  | NS       | NS   |
| NM_009553    | <i>Zscan2</i>  | BXD60 | NS       | NS   | 3.14E-02 | 1.6  |
| ENSMUST0000  |                |       |          |      |          | NS   |
| 0079024      | <i>Zscan29</i> | BXD60 | 6.95E-04 | 1.9  | NS       |      |
| NM_028028    | <i>Zswim1</i>  | BXD60 | NS       | NS   | 4.13E-02 | -1.5 |
| NM_027964    | <i>Zswim2</i>  | BXD60 | 3.49E-02 | -1.5 | NS       | NS   |
| NM_001045536 | <i>Zzef1</i>   | BXD60 | 4.79E-02 | 1.5  | NS       | NS   |
| NM_001166372 | <i>-44256</i>  | BXD71 | 3.11E-03 | 1.6  | NS       | NS   |
| NM_030210    | <i>Aacs</i>    | BXD71 | NS       | NS   | 3.33E-03 | -1.6 |
| NM_013851    | <i>Abca8b</i>  | BXD71 | 4.85E-03 | 2.1  | 4.33E-02 | 1.8  |
| NM_025538    | <i>Alkbh7</i>  | BXD71 | NS       | NS   | 1.37E-02 | -1.6 |
| NM_028390    | <i>Anln</i>    | BXD71 | 3.15E-02 | 2.1  | NS       | NS   |
| NM_007481    | <i>Arf6</i>    | BXD71 | NS       | NS   | 2.77E-02 | -1.3 |
| NM_001172205 | <i>Arid5a</i>  | BXD71 | NS       | NS   | 2.47E-02 | 1.9  |
| NM_023598    | <i>Arid5b</i>  | BXD71 | 1.45E-02 | 1.6  | 3.28E-04 | 1.8  |
| NM_001162485 | <i>Arrdc1</i>  | BXD71 | 3.22E-02 | 1.4  | NS       | NS   |
| NM_001042591 | <i>Arrdc3</i>  | BXD71 | 1.29E-05 | 2.4  | 1.45E-04 | 2.2  |
| NM_001042592 | <i>Arrdc4</i>  | BXD71 | 1.16E-02 | 1.8  | 1.47E-02 | 1.7  |
| NM_001287180 | <i>Atf4</i>    | BXD71 | NS       | NS   | 1.12E-02 | -1.5 |
| NM_026217    | <i>Atg12</i>   | BXD71 | 4.54E-03 | 1.4  | 4.49E-02 | 1.3  |



|              |                |       |          |      |          |      |
|--------------|----------------|-------|----------|------|----------|------|
| NM_001081182 | <i>Atp8b2</i>  | BXD71 | NS       | NS   | 2.45E-02 | 1.7  |
| NM_001199304 | <i>Atxn1</i>   | BXD71 | 3.08E-02 | 1.4  | 2.09E-02 | 1.4  |
| NM_001080930 | <i>Atxn1l</i>  | BXD71 | NS       | NS   | 4.79E-02 | 1.5  |
| NM_016847    | <i>Avpr1a</i>  | BXD71 | 4.38E-03 | -2.0 | 6.99E-03 | -1.9 |
| NM_020025    | <i>B3galt2</i> | BXD71 | 9.02E-03 | 1.6  | 1.45E-02 | 1.5  |
| NM_175325    | <i>Bbs4</i>    | BXD71 | 4.31E-03 | 1.4  | 3.27E-03 | 1.4  |
| NM_001284410 | <i>Bcl2l11</i> | BXD71 | 5.01E-04 | 2.3  | 2.11E-03 | 2.1  |
| NM_133889    | <i>Bsdc1</i>   | BXD71 | NS       | NS   | 3.28E-04 | 1.5  |
| NM_007570    | <i>Btg2</i>    | BXD71 | NS       | NS   | 8.98E-03 | 1.8  |
| NM_009770    | <i>Btg3</i>    | BXD71 | NS       | NS   | 8.32E-04 | 2.0  |
| NM_144817    | <i>Camk1g</i>  | BXD71 | 4.42E-02 | -1.4 | NS       | NS   |
| NM_007625    | <i>Cbx4</i>    | BXD71 | NS       | NS   | 2.33E-02 | -1.4 |
| NM_172404    | <i>Ccbl1</i>   | BXD71 | 3.22E-02 | 1.6  | NS       | NS   |
| NM_144820    | <i>Ccdc28a</i> | BXD71 | 2.93E-02 | 1.9  | NS       | NS   |
| NM_026014    | <i>Cdt1</i>    | BXD71 | NS       | NS   | 1.99E-02 | -1.7 |
| NM_001081345 | <i>Chd2</i>    | BXD71 | NS       | NS   | 3.83E-03 | 1.6  |
| NM_001289429 | <i>Cipc</i>    | BXD71 | NS       | NS   | 1.73E-02 | -1.4 |
| NM_025854    | <i>Cir1</i>    | BXD71 | NS       | NS   | 4.25E-03 | 1.5  |
| NM_001243762 | <i>Clcn5</i>   | BXD71 | NS       | NS   | 2.69E-03 | 1.8  |
| NM_001252525 | <i>Cpeb1</i>   | BXD71 | 4.37E-02 | 1.9  | 1.16E-02 | 2.0  |
| NM_172728    | <i>Creb5</i>   | BXD71 | NS       | NS   | 2.06E-02 | 1.9  |
| NM_001110850 | <i>Crem</i>    | BXD71 | NS       | NS   | 1.80E-02 | 1.7  |
| NM_007762    | <i>Crhr1</i>   | BXD71 | 3.24E-02 | -1.7 | 2.02E-02 | -1.7 |
| NM_028979    | <i>Cyp2j9</i>  | BXD71 | NS       | NS   | 2.11E-03 | 2.0  |
| NM_020010    | <i>Cyp51</i>   | BXD71 | NS       | NS   | 1.28E-02 | -1.4 |
| NM_019553    | <i>Ddx21</i>   | BXD71 | 3.15E-02 | -1.5 | NS       | NS   |
| NM_021494    | <i>Dennd5a</i> | BXD71 | NS       | NS   | 3.76E-02 | 1.3  |
| NM_053272    | <i>Dhcr24</i>  | BXD71 | 1.49E-02 | -1.4 | 8.45E-08 | -1.7 |
| NM_007842    | <i>Dhx9</i>    | BXD71 | NS       | NS   | 2.31E-02 | -1.3 |
| NM_019454    | <i>Dll4</i>    | BXD71 | 1.45E-02 | -1.8 | NS       | NS   |
| NM_025926    | <i>Dnajb4</i>  | BXD71 | 1.63E-03 | 1.5  | NS       | NS   |
| NM_029669    | <i>Dnajc18</i> | BXD71 | 3.98E-03 | 1.5  | NS       | NS   |
| NM_001285807 | <i>Dtna</i>    | BXD71 | NS       | NS   | 2.46E-03 | 1.4  |
| NM_013642    | <i>Dusp1</i>   | BXD71 | 5.22E-08 | 2.5  | 4.11E-08 | 2.5  |
| NM_001048054 | <i>Dusp16</i>  | BXD71 | 2.18E-02 | 1.8  | 9.73E-06 | 2.4  |
| NM_176933    | <i>Dusp4</i>   | BXD71 | NS       | NS   | 3.28E-04 | -2.1 |
| NM_026268    | <i>Dusp6</i>   | BXD71 | NS       | NS   | 3.33E-03 | -1.7 |
| NM_008748    | <i>Dusp8</i>   | BXD71 | 3.62E-04 | 1.4  | 2.02E-05 | 1.5  |

|              |                 |       |          |      |          |      |
|--------------|-----------------|-------|----------|------|----------|------|
| NM_026932    | <i>Ebna1bp2</i> | BXD71 | NS       | NS   | 3.80E-02 | -1.4 |
| NM_001289925 | <i>Egr3</i>     | BXD71 | 2.11E-02 | -1.8 | 1.45E-04 | -2.3 |
| NM_023794    | <i>Etv5</i>     | BXD71 | 6.16E-03 | -1.8 | 2.03E-02 | -1.6 |
| NM_001163514 | <i>Extl2</i>    | BXD71 | NS       | NS   | 1.10E-02 | 1.5  |
| NM_001163567 | <i>Fam102b</i>  | BXD71 | 3.22E-02 | 1.3  | NS       | NS   |
| NM_183187    | <i>Fam107a</i>  | BXD71 | 4.08E-03 | 2.5  | 9.57E-04 | 2.6  |
| NM_178908    | <i>Fam26e</i>   | BXD71 | 2.09E-03 | 1.9  | 2.48E-03 | 1.9  |
| NM_175104    | <i>Fam53c</i>   | BXD71 | 6.27E-03 | 1.8  | 3.12E-02 | 1.7  |
| NM_010191    | <i>Fdft1</i>    | BXD71 | NS       | NS   | 8.38E-04 | -1.4 |
| NM_001164259 | <i>Fgfr1</i>    | BXD71 | NS       | NS   | 1.76E-02 | -1.6 |
| NM_008013    | <i>Fgl2</i>     | BXD71 | NS       | NS   | 2.56E-03 | 1.8  |
| NM_022009    | <i>Flii</i>     | BXD71 | NS       | NS   | 1.09E-02 | -1.5 |
| NM_001159706 | <i>Folh1</i>    | BXD71 | NS       | NS   | 4.50E-04 | 2.5  |
| NM_008046    | <i>Fst</i>      | BXD71 | 4.25E-02 | -1.7 | 1.88E-03 | -1.9 |
| NM_027518    | <i>Gpr137c</i>  | BXD71 | 9.55E-06 | 1.9  | 7.50E-06 | 1.9  |
| NM_010338    | <i>Gpr37</i>    | BXD71 | 4.09E-04 | 2.0  | 3.83E-03 | 1.8  |
| NM_145066    | <i>Gpr85</i>    | BXD71 | 3.15E-02 | 1.5  | 1.66E-02 | 1.5  |
| NM_172768    | <i>Gramd1b</i>  | BXD71 | 2.78E-02 | 1.5  | NS       | NS   |
| NM_001114333 | <i>Grm1</i>     | BXD71 | 4.42E-02 | 1.5  | NS       | NS   |
| NM_198962    | <i>Hcrtr2</i>   | BXD71 | NS       | NS   | 2.46E-03 | -1.9 |
| NM_144835    | <i>Heatr1</i>   | BXD71 | NS       | NS   | 2.28E-02 | -1.6 |
| NM_010422    | <i>Hexb</i>     | BXD71 | NS       | NS   | 2.31E-02 | 1.4  |
| NM_001098203 | <i>Hic1</i>     | BXD71 | 3.11E-02 | -1.6 | NS       | NS   |
| NM_010431    | <i>Hif1a</i>    | BXD71 | 2.53E-02 | -1.3 | NS       | NS   |
| NM_008255    | <i>Hmgcr</i>    | BXD71 | NS       | NS   | 8.41E-03 | -1.5 |
| NM_008256    | <i>Hmgcs2</i>   | BXD71 | NS       | NS   | 2.46E-03 | 2.4  |
| NM_010476    | <i>Hsd17b7</i>  | BXD71 | 2.24E-03 | -1.6 | 1.65E-02 | -1.5 |
| NM_024255    | <i>Hsdl2</i>    | BXD71 | NS       | NS   | 2.02E-02 | 1.5  |
| NM_019564    | <i>Htra1</i>    | BXD71 | 2.30E-02 | 1.7  | 4.64E-03 | 1.8  |
| NM_015755    | <i>Hunk</i>     | BXD71 | NS       | NS   | 3.00E-02 | -1.7 |
| NM_145360    | <i>Idi1</i>     | BXD71 | 7.98E-05 | -1.8 | 8.45E-08 | -2.2 |
| NM_001101605 | <i>Ifit1bl1</i> | BXD71 | 1.45E-02 | 2.1  | NS       | NS   |
| NM_153526    | <i>Insig1</i>   | BXD71 | 3.69E-04 | -2.0 | 2.46E-03 | -1.8 |
| NM_016851    | <i>Irf6</i>     | BXD71 | NS       | NS   | 1.56E-02 | 1.7  |
| NM_010591    | <i>Jun</i>      | BXD71 | 2.72E-19 | 4.5  | 5.89E-15 | 3.6  |
| NM_001286944 | <i>Jund</i>     | BXD71 | 3.77E-04 | 1.8  | 3.42E-04 | 1.7  |
| NM_001081134 | <i>Kcng1</i>    | BXD71 | NS       | NS   | 6.79E-03 | -1.8 |
| NM_026214    | <i>Kctd4</i>    | BXD71 | 1.59E-02 | 1.5  | NS       | NS   |

|              |                 |       |          |      |          |      |
|--------------|-----------------|-------|----------|------|----------|------|
| NM_001122733 | <i>Kit</i>      | BXD71 | NS       | NS   | 3.28E-02 | -1.3 |
| NM_010636    | <i>Klf12</i>    | BXD71 | NS       | NS   | 2.66E-02 | 1.4  |
| NM_078477    | <i>Klf16</i>    | BXD71 | NS       | NS   | 8.75E-03 | -1.6 |
| NM_001252658 | <i>Ldlr</i>     | BXD71 | NS       | NS   | 3.94E-03 | -2.0 |
| NM_001199043 | <i>Lgals8</i>   | BXD71 | 4.08E-03 | 1.6  | NS       | NS   |
| NM_178005    | <i>Lrrtm2</i>   | BXD71 | 1.63E-02 | 1.4  | NS       | NS   |
| NM_001045483 | <i>Mapk1ip1</i> | BXD71 | 4.95E-03 | 1.5  | 3.33E-03 | 1.5  |
| NM_011841    | <i>Mapk7</i>    | BXD71 | 1.45E-02 | -1.4 | NS       | NS   |
| NM_008563    | <i>Mcm3</i>     | BXD71 | NS       | NS   | 3.05E-02 | -1.8 |
| NM_008567    | <i>Mcm6</i>     | BXD71 | 3.15E-02 | -1.5 | NS       | NS   |
| NM_023799    | <i>Mgea5</i>    | BXD71 | NS       | NS   | 6.28E-03 | 1.4  |
| NM_030110    | <i>Micu3</i>    | BXD71 | NS       | NS   | 2.63E-02 | 1.4  |
| NM_021565    | <i>Midn</i>     | BXD71 | NS       | NS   | 1.65E-02 | -1.5 |
| NM_025436    | <i>Msmo1</i>    | BXD71 | 3.98E-03 | -1.8 | 2.02E-05 | -2.2 |
| NM_013602    | <i>Mt1</i>      | BXD71 | 2.09E-03 | 1.6  | 2.77E-02 | 1.5  |
| NM_008630    | <i>Mt2</i>      | BXD71 | 1.20E-04 | 2.4  | 1.39E-03 | 2.1  |
| NM_008638    | <i>Mthfd2</i>   | BXD71 | NS       | NS   | 9.64E-03 | -1.8 |
| NM_138656    | <i>Mvd</i>      | BXD71 | 2.50E-02 | -1.7 | 1.88E-03 | -1.9 |
| NM_001008542 | <i>Mxi1</i>     | BXD71 | 3.88E-03 | 1.5  | 9.79E-09 | 2.0  |
| NM_028995    | <i>Nipal3</i>   | BXD71 | NS       | NS   | 1.70E-03 | 1.9  |
| NM_021303    | <i>Noc2l</i>    | BXD71 | NS       | NS   | 1.65E-02 | -1.5 |
| NM_138747    | <i>Nop2</i>     | BXD71 | NS       | NS   | 1.45E-04 | -1.7 |
| NM_010342    | <i>Npbwr1</i>   | BXD71 | 1.63E-02 | 1.7  | 1.39E-03 | 1.9  |
| NM_019409    | <i>Omg</i>      | BXD71 | NS       | NS   | 3.33E-03 | 1.5  |
| NM_152818    | <i>Osbp2</i>    | BXD71 | 1.79E-02 | 1.4  | 4.17E-02 | 1.4  |
| NM_001134791 | <i>Osbp19</i>   | BXD71 | NS       | NS   | 2.34E-04 | 1.5  |
| NM_001285839 | <i>Osgepl1</i>  | BXD71 | NS       | NS   | 1.18E-02 | 1.7  |
| NM_008812    | <i>Padi2</i>    | BXD71 | NS       | NS   | 2.71E-02 | -1.8 |
| NM_146169    | <i>Paip2b</i>   | BXD71 | NS       | NS   | 2.14E-02 | 1.5  |
| NM_153594    | <i>Pcmt2</i>    | BXD71 | NS       | NS   | 4.35E-02 | 1.6  |
| NM_024229    | <i>Pcyt2</i>    | BXD71 | NS       | NS   | 1.27E-02 | -1.6 |
| NM_001177980 | <i>Pde4b</i>    | BXD71 | 4.71E-03 | 1.5  | 3.92E-02 | 1.4  |
| NM_008808    | <i>Pdgfa</i>    | BXD71 | NS       | NS   | 2.89E-02 | -1.4 |
| NM_001159367 | <i>Per1</i>     | BXD71 | 1.20E-02 | 1.6  | 9.68E-03 | 1.6  |
| NM_053191    | <i>Pi15</i>     | BXD71 | 1.94E-02 | 2.0  | NS       | NS   |
| NM_178149    | <i>Pik3ip1</i>  | BXD71 | 2.21E-03 | 2.0  | 1.39E-03 | 2.0  |
| NM_001024955 | <i>Pik3r1</i>   | BXD71 | 5.00E-09 | 1.8  | 3.38E-10 | 1.9  |
| NM_008872    | <i>Plat</i>     | BXD71 | NS       | NS   | 2.14E-02 | 1.6  |

|              |                 |       |          |      |          |      |
|--------------|-----------------|-------|----------|------|----------|------|
| NM_152813    | <i>Plcd3</i>    | BXD71 | NS       | NS   | 1.27E-02 | 1.7  |
| NM_001033253 | <i>Plekhhg1</i> | BXD71 | 1.94E-02 | 1.6  | 7.14E-05 | 2.0  |
| NM_013807    | <i>Plk3</i>     | BXD71 | NS       | NS   | 1.65E-02 | -1.6 |
| NM_001033225 | <i>Pnrc1</i>    | BXD71 | NS       | NS   | 1.96E-02 | 1.4  |
| NM_175523    | <i>Ppm1k</i>    | BXD71 | 3.91E-03 | 1.7  | NS       | NS   |
| NM_028980    | <i>Ppp4r4</i>   | BXD71 | 7.19E-03 | 1.6  | NS       | NS   |
| NM_182997    | <i>Prkab2</i>   | BXD71 | 3.03E-02 | 1.4  | 1.05E-02 | 1.5  |
| NM_177698    | <i>Psd3</i>     | BXD71 | 3.10E-02 | 1.3  | NS       | NS   |
| NM_139270    | <i>Pth2r</i>    | BXD71 | 4.70E-02 | -2.0 | NS       | NS   |
| NM_025831    | <i>Pxdc1</i>    | BXD71 | 2.29E-03 | 1.8  | NS       | NS   |
| NM_029494    | <i>Rab30</i>    | BXD71 | 1.55E-03 | 1.6  | 2.02E-05 | 1.8  |
| NM_001038621 | <i>Rabgap1l</i> | BXD71 | 2.09E-03 | 1.4  | 1.06E-02 | 1.4  |
| NM_001099624 | <i>Rapgef2</i>  | BXD71 | 1.29E-09 | 1.9  | 1.41E-07 | 1.7  |
| NM_001252494 | <i>Rapgef6</i>  | BXD71 | 1.37E-06 | 2.1  | 1.95E-07 | 2.2  |
| NM_028234    | <i>Rbm33</i>    | BXD71 | NS       | NS   | 1.80E-02 | 1.4  |
| NM_001141981 | <i>Rbm43</i>    | BXD71 | NS       | NS   | 2.24E-02 | 1.5  |
| NM_009062    | <i>Rgs4</i>     | BXD71 | NS       | NS   | 5.41E-03 | 1.6  |
| NM_153514    | <i>Rhobtb2</i>  | BXD71 | NS       | NS   | 1.76E-02 | -1.5 |
| NM_021540    | <i>Rnf130</i>   | BXD71 | 5.14E-03 | 1.4  | NS       | NS   |
| NM_001166553 | <i>Rnf145</i>   | BXD71 | NS       | NS   | 1.95E-03 | -1.5 |
| NM_146244    | <i>Rps6kl1</i>  | BXD71 | 6.92E-04 | 1.9  | 3.28E-04 | 2.0  |
| NM_172604    | <i>Scara3</i>   | BXD71 | NS       | NS   | 4.55E-03 | 1.6  |
| NM_009129    | <i>Scg2</i>     | BXD71 | NS       | NS   | 2.46E-03 | 1.4  |
| NM_011521    | <i>Sdc4</i>     | BXD71 | 3.22E-02 | 1.9  | 1.10E-02 | 2.0  |
| NM_030261    | <i>Sesn3</i>    | BXD71 | NS       | NS   | 1.20E-03 | 1.5  |
| NM_009167    | <i>Shc3</i>     | BXD71 | NS       | NS   | 1.76E-02 | -1.3 |
| NM_001286538 | <i>Sigmar1</i>  | BXD71 | NS       | NS   | 4.25E-03 | -1.5 |
| NM_001167983 | <i>Sipa1l1</i>  | BXD71 | NS       | NS   | 2.37E-02 | 1.4  |
| NM_027921    | <i>Slc16a14</i> | BXD71 | 1.63E-02 | 1.6  | 3.42E-04 | 1.8  |
| NM_001029842 | <i>Slc16a6</i>  | BXD71 | NS       | NS   | 4.70E-02 | 1.9  |
| NM_001159593 | <i>Slc20a1</i>  | BXD71 | 3.68E-02 | -1.4 | 1.51E-03 | -1.5 |
| NM_172479    | <i>Slc38a5</i>  | BXD71 | NS       | NS   | 2.59E-02 | -1.5 |
| NM_001081263 | <i>Slc44a5</i>  | BXD71 | 6.49E-05 | 1.8  | 3.51E-04 | 1.7  |
| NM_025690    | <i>Sltm</i>     | BXD71 | NS       | NS   | 1.47E-02 | -1.4 |
| NM_008539    | <i>Smad1</i>    | BXD71 | NS       | NS   | 1.81E-02 | 1.4  |
| NM_027671    | <i>Sntg1</i>    | BXD71 | NS       | NS   | 1.99E-02 | 1.6  |
| NM_182927    | <i>Spred3</i>   | BXD71 | 3.15E-02 | -1.9 | NS       | NS   |
| NM_011898    | <i>Spry4</i>    | BXD71 | 3.22E-02 | -1.7 | 1.69E-02 | -1.8 |

|              |                |       |          |      |          |      |
|--------------|----------------|-------|----------|------|----------|------|
| NM_009270    | <i>Sqle</i>    | BXD71 | NS       | NS   | 4.96E-04 | -1.7 |
| NM_011358    | <i>Srsf2</i>   | BXD71 | NS       | NS   | 8.49E-03 | -1.5 |
| NM_001195485 | <i>Srsf7</i>   | BXD71 | NS       | NS   | 8.64E-03 | -1.7 |
| NM_133774    | <i>Stard4</i>  | BXD71 | NS       | NS   | 2.02E-02 | -1.7 |
| NM_019675    | <i>Stmn4</i>   | BXD71 | 3.15E-02 | 1.6  | 2.93E-02 | 1.5  |
| NM_153563    | <i>Strip1</i>  | BXD71 | NS       | NS   | 1.65E-02 | -1.4 |
| NM_153399    | <i>Syne1</i>   | BXD71 | 3.22E-02 | 1.5  | NS       | NS   |
| NM_001040085 | <i>Sytl2</i>   | BXD71 | NS       | NS   | 2.92E-03 | 2.0  |
| NM_029431    | <i>Them4</i>   | BXD71 | NS       | NS   | 3.45E-02 | 1.5  |
| NM_177412    | <i>Tmcc1</i>   | BXD71 | NS       | NS   | 1.96E-02 | 1.4  |
| NM_001160385 | <i>Tmem196</i> | BXD71 | NS       | NS   | 1.51E-03 | 1.9  |
| NM_177344    | <i>Tmem203</i> | BXD71 | NS       | NS   | 9.32E-03 | -1.8 |
| NM_011607    | <i>Tnc</i>     | BXD71 | NS       | NS   | 2.31E-02 | -1.5 |
| NM_001122843 | <i>Tnpo2</i>   | BXD71 | 3.91E-03 | 1.4  | NS       | NS   |
| NM_198102    | <i>Tra2a</i>   | BXD71 | NS       | NS   | 7.41E-03 | -1.5 |
| NM_009186    | <i>Tra2b</i>   | BXD71 | NS       | NS   | 7.57E-03 | -1.4 |
| NM_001170855 | <i>Trim36</i>  | BXD71 | NS       | NS   | 4.03E-02 | -2.0 |
| NM_027182    | <i>Trip13</i>  | BXD71 | 4.37E-02 | -1.7 | NS       | NS   |
| NM_001009935 | <i>Txnip</i>   | BXD71 | NS       | NS   | 6.22E-05 | 3.3  |
| NM_001169576 | <i>Ube2h</i>   | BXD71 | 6.92E-04 | 1.6  | 6.96E-04 | 1.6  |
| NM_001083319 | <i>Ubp1</i>    | BXD71 | NS       | NS   | 1.32E-02 | -1.4 |
| NM_030724    | <i>Uck2</i>    | BXD71 | NS       | NS   | 2.46E-03 | -1.4 |
| NM_001039385 | <i>Vgf</i>     | BXD71 | NS       | NS   | 4.25E-03 | -2.2 |
| NM_001142580 | <i>Vipas39</i> | BXD71 | 1.63E-02 | 1.4  | NS       | NS   |
| NM_029478    | <i>Vmp1</i>    | BXD71 | NS       | NS   | 3.24E-02 | 1.4  |
| NM_001110015 | <i>Wdr36</i>   | BXD71 | NS       | NS   | 5.12E-03 | -1.5 |
| NM_001035226 | <i>Xpo1</i>    | BXD71 | 3.86E-02 | 1.5  | NS       | NS   |
| NM_001005342 | <i>Ypel4</i>   | BXD71 | 2.09E-03 | 2.4  | 1.50E-02 | 2.1  |
| NM_027166    | <i>Ypel5</i>   | BXD71 | 1.29E-05 | 1.7  | 3.04E-03 | 1.5  |
| NM_001115130 | <i>Zbtb44</i>  | BXD71 | 1.23E-02 | 1.4  | 1.76E-02 | 1.4  |
| NM_001110309 | <i>Zfp426</i>  | BXD71 | 4.38E-03 | 1.6  | 8.75E-03 | 1.5  |
| NM_001252584 | <i>Zmynd8</i>  | BXD71 | 7.48E-04 | 1.8  | NS       | NS   |
| NR_045177    | 2900055J20Rik  | BXD73 | 1.15E-02 | 1.7  | NS       | NS   |
| NR_015488    | A930003A15Rik  | BXD73 | 2.81E-02 | 1.9  | NS       | NS   |
| NM_030210    | <i>Aacs</i>    | BXD73 | 4.52E-02 | -1.5 | 8.85E-03 | -1.6 |
| NM_001190443 | <i>Abcf2</i>   | BXD73 | 5.26E-03 | -1.4 | NS       | NS   |
| NM_009338    | <i>Acat2</i>   | BXD73 | 3.70E-02 | -1.4 | NS       | NS   |
| NM_025538    | <i>Alkbh7</i>  | BXD73 | 6.48E-03 | -1.6 | NS       | NS   |

|              |                 |       |          |      |          |      |
|--------------|-----------------|-------|----------|------|----------|------|
| NM_020581    | <i>Angptl4</i>  | BXD73 | 2.29E-02 | 1.9  | 2.44E-02 | 2.0  |
| NM_001277188 | <i>Ano4</i>     | BXD73 | 4.10E-02 | 1.5  | NS       | NS   |
| NM_009705    | <i>Arg2</i>     | BXD73 | 3.94E-02 | 1.9  | NS       | NS   |
| NM_023598    | <i>Arid5b</i>   | BXD73 | 6.46E-04 | 1.7  | NS       | NS   |
| NM_001042591 | <i>Arrdc3</i>   | BXD73 | 2.05E-07 | 2.8  | 2.35E-06 | 2.6  |
| NM_001042592 | <i>Arrdc4</i>   | BXD73 | 1.79E-02 | 1.7  | NS       | NS   |
| NM_027444    | <i>Bbx</i>      | BXD73 | NS       | NS   | 1.25E-02 | 1.8  |
| NM_001284410 | <i>Bcl2l11</i>  | BXD73 | 3.04E-06 | 2.8  | 3.19E-03 | 2.2  |
| NM_009747    | <i>Bdkrb2</i>   | BXD73 | 6.66E-04 | 2.2  | NS       | NS   |
| NM_007570    | <i>Btg2</i>     | BXD73 | 3.36E-02 | 1.7  | NS       | NS   |
| NM_009770    | <i>Btg3</i>     | BXD73 | 1.41E-02 | 1.8  | NS       | NS   |
| NM_144817    | <i>Camk1g</i>   | BXD73 | 8.90E-03 | -1.5 | NS       | NS   |
| NM_001285446 | <i>Cbfa2t2</i>  | BXD73 | 1.12E-02 | -1.4 | NS       | NS   |
| NM_007631    | <i>Ccnd1</i>    | BXD73 | 4.35E-04 | -1.8 | NS       | NS   |
| NM_007635    | <i>Ccng2</i>    | BXD73 | NS       | NS   | 3.24E-02 | 1.5  |
| NM_031998    | <i>Cep41</i>    | BXD73 | 4.42E-02 | -2.0 | NS       | NS   |
| NM_001081345 | <i>Chd2</i>     | BXD73 | 4.31E-02 | 1.4  | NS       | NS   |
| NM_199008    | <i>Cox11</i>    | BXD73 | NS       | NS   | 1.78E-02 | -1.5 |
| NM_001252525 | <i>Cpeb1</i>    | BXD73 | 3.08E-02 | 1.9  | NS       | NS   |
| NM_172728    | <i>Creb5</i>    | BXD73 | 3.73E-02 | 1.8  | 9.76E-03 | 2.0  |
| NM_001110850 | <i>Crem</i>     | BXD73 | 7.82E-03 | 1.7  | 2.92E-02 | 1.7  |
| NM_028868    | <i>Cxxc1</i>    | BXD73 | 4.79E-02 | -1.4 | NS       | NS   |
| NM_028979    | <i>Cyp2j9</i>   | BXD73 | 1.41E-02 | 1.8  | NS       | NS   |
| NM_020010    | <i>Cyp51</i>    | BXD73 | 2.77E-03 | -1.5 | 4.33E-03 | -1.5 |
| NM_019553    | <i>Ddx21</i>    | BXD73 | 1.03E-02 | -1.6 | NS       | NS   |
| NM_053272    | <i>Dhcr24</i>   | BXD73 | 4.61E-06 | -1.6 | 2.35E-06 | -1.6 |
| NM_177648    | <i>Dolk</i>     | BXD73 | 2.57E-02 | -1.4 | NS       | NS   |
| NM_001285807 | <i>Dtna</i>     | BXD73 | 2.63E-02 | 1.3  | NS       | NS   |
| NM_013642    | <i>Dusp1</i>    | BXD73 | 3.06E-03 | 1.8  | 2.23E-03 | 1.8  |
| NM_026268    | <i>Dusp6</i>    | BXD73 | 8.69E-04 | -1.8 | NS       | NS   |
| NM_008748    | <i>Dusp8</i>    | BXD73 | 1.68E-04 | 1.5  | 3.10E-02 | 1.3  |
| NM_013512    | <i>Epb41l4a</i> | BXD73 | 4.60E-02 | -1.5 | NS       | NS   |
| NM_008815    | <i>Etv4</i>     | BXD73 | NS       | NS   | 1.78E-02 | -1.6 |
| NM_010171    | <i>F3</i>       | BXD73 | 6.55E-03 | 1.7  | NS       | NS   |
| NM_183187    | <i>Fam107a</i>  | BXD73 | 1.08E-04 | 3.0  | 1.90E-02 | 2.3  |
| NM_178908    | <i>Fam26e</i>   | BXD73 | 2.23E-03 | 1.9  | NS       | NS   |
| NM_175104    | <i>Fam53c</i>   | BXD73 | 3.73E-02 | 1.7  | NS       | NS   |
| NM_010191    | <i>Fdft1</i>    | BXD73 | 2.21E-04 | -1.5 | 2.50E-03 | -1.4 |

|              |                 |       |          |      |          |      |
|--------------|-----------------|-------|----------|------|----------|------|
| NM_001253751 | <i>Fdps</i>     | BXD73 | 1.27E-03 | -1.8 | NS       | NS   |
| NM_010234    | <i>Fos</i>      | BXD73 | 3.06E-03 | 2.3  | 1.87E-02 | 2.1  |
| NM_008036    | <i>Fosb</i>     | BXD73 | 1.37E-03 | 2.7  | 2.40E-02 | 2.3  |
| NM_010244    | <i>Fv1</i>      | BXD73 | 1.37E-03 | -2.2 | NS       | NS   |
| NM_028022    | <i>Gatsl3</i>   | BXD73 | 1.64E-02 | 2.1  | NS       | NS   |
| NM_001205101 | <i>Gm13212</i>  | BXD73 | NS       | NS   | 2.99E-02 | 2.3  |
| NM_001204913 | <i>Gm20172</i>  | BXD73 | NS       | NS   | 1.87E-02 | 2.2  |
| NM_153547    | <i>Gnl3</i>     | BXD73 | 4.62E-02 | -1.6 | NS       | NS   |
| NM_027518    | <i>Gpr137c</i>  | BXD73 | 5.27E-06 | 1.9  | 2.93E-02 | 1.5  |
| NM_145066    | <i>Gpr85</i>    | BXD73 | 2.29E-02 | 1.5  | NS       | NS   |
| NM_001195774 | <i>Gprc5b</i>   | BXD73 | 2.37E-02 | 1.5  | NS       | NS   |
| NM_153419    | <i>Grwd1</i>    | BXD73 | NS       | NS   | 1.27E-02 | -2.0 |
| NM_010360    | <i>Gstm5</i>    | BXD73 | 3.70E-02 | 1.3  | NS       | NS   |
| NM_198962    | <i>Hcrtr2</i>   | BXD73 | 1.63E-02 | -1.8 | NS       | NS   |
| NM_144835    | <i>Heatr1</i>   | BXD73 | 8.14E-03 | -1.7 | 4.29E-02 | -1.6 |
| NM_026101    | <i>Herc4</i>    | BXD73 | 8.59E-03 | -1.6 | NS       | NS   |
| NM_010431    | <i>Hif1a</i>    | BXD73 | 1.68E-02 | -1.3 | NS       | NS   |
| NM_008256    | <i>Hmgcs2</i>   | BXD73 | 5.48E-04 | 2.7  | 1.13E-02 | 2.3  |
| NM_198937    | <i>Hn1l</i>     | BXD73 | 2.24E-02 | -1.6 | NS       | NS   |
| NM_053262    | <i>Hsd17b11</i> | BXD73 | 2.05E-02 | 1.5  | NS       | NS   |
| NM_010476    | <i>Hsd17b7</i>  | BXD73 | 7.60E-04 | -1.7 | 7.99E-04 | -1.7 |
| NM_019564    | <i>Htra1</i>    | BXD73 | 2.91E-02 | 1.6  | NS       | NS   |
| NM_145360    | <i>Idi1</i>     | BXD73 | 2.05E-07 | -2.1 | 8.33E-07 | -2.1 |
| NM_013562    | <i>Ifrd1</i>    | BXD73 | NS       | NS   | 8.35E-03 | -1.8 |
| NM_010518    | <i>Igfbp5</i>   | BXD73 | NS       | NS   | 3.94E-02 | 1.6  |
| NM_001033323 | <i>Igsf9b</i>   | BXD73 | 1.53E-02 | 1.8  | NS       | NS   |
| NM_153526    | <i>Insig1</i>   | BXD73 | 1.57E-06 | -2.3 | 5.97E-06 | -2.3 |
| NM_010591    | <i>Jun</i>      | BXD73 | 2.62E-08 | 2.5  | 2.35E-06 | 2.2  |
| NM_001286944 | <i>Jund</i>     | BXD73 | 9.56E-06 | 1.9  | 4.29E-02 | 1.5  |
| NM_001081134 | <i>Kcng1</i>    | BXD73 | NS       | NS   | 2.38E-02 | -1.8 |
| NM_080465    | <i>Kcnm2</i>    | BXD73 | 4.70E-02 | 1.4  | NS       | NS   |
| NM_026200    | <i>Kcnv1</i>    | BXD73 | 4.12E-02 | -1.7 | NS       | NS   |
| NM_010636    | <i>Klf12</i>    | BXD73 | NS       | NS   | 3.94E-02 | 1.4  |
| NM_078477    | <i>Klf16</i>    | BXD73 | 2.71E-02 | -1.6 | NS       | NS   |
| NM_010638    | <i>Klf9</i>     | BXD73 | 2.34E-02 | 1.5  | NS       | NS   |
| NM_001252658 | <i>Ldlr</i>     | BXD73 | 5.10E-04 | -2.3 | 3.61E-04 | -2.3 |
| NM_001045483 | <i>Mapk1ip1</i> | BXD73 | 4.71E-02 | 1.4  | NS       | NS   |
| NM_011841    | <i>Mapk7</i>    | BXD73 | 2.71E-02 | -1.4 | NS       | NS   |

|              |                 |       |          |      |          |      |
|--------------|-----------------|-------|----------|------|----------|------|
| NM_008567    | <i>Mcm6</i>     | BXD73 | 1.79E-02 | -1.5 | NS       | NS   |
| NM_026896    | <i>Med27</i>    | BXD73 | 1.45E-03 | -1.5 | NS       | NS   |
| NM_023799    | <i>Mgea5</i>    | BXD73 | 3.30E-03 | 1.4  | 1.97E-04 | 1.5  |
| NM_025878    | <i>Mrps18b</i>  | BXD73 | NS       | NS   | 1.06E-03 | -1.8 |
| NM_025436    | <i>Msmo1</i>    | BXD73 | 2.71E-05 | -2.2 | 1.83E-04 | -2.1 |
| NM_013602    | <i>Mt1</i>      | BXD73 | 1.93E-04 | 1.8  | NS       | NS   |
| NM_008630    | <i>Mt2</i>      | BXD73 | 1.57E-06 | 2.8  | 5.18E-03 | 2.1  |
| NM_138656    | <i>Mvd</i>      | BXD73 | 2.42E-04 | -2.1 | 5.38E-03 | -1.9 |
| NM_001008542 | <i>Mxi1</i>     | BXD73 | 1.57E-06 | 1.8  | 2.40E-04 | 1.6  |
| NM_028757    | <i>Nabl</i>     | BXD73 | NS       | NS   | 9.71E-04 | 2.0  |
| NM_001048168 | <i>Nfyc</i>     | BXD73 | 1.45E-02 | -1.4 | NS       | NS   |
| NM_001161329 | <i>Nol11</i>    | BXD73 | 1.82E-02 | -1.4 | NS       | NS   |
| NM_010941    | <i>Nsdhl</i>    | BXD73 | 1.08E-02 | -1.4 | NS       | NS   |
| NM_178644    | <i>Oaf</i>      | BXD73 | NS       | NS   | 1.36E-02 | 2.2  |
| NM_146293    | <i>Olf1143</i>  | BXD73 | NS       | NS   | 2.92E-02 | -2.4 |
| NM_146462    | <i>Olf1202</i>  | BXD73 | 4.31E-02 | 2.4  | NS       | NS   |
| NM_001134791 | <i>Osbpl9</i>   | BXD73 | 1.54E-02 | 1.3  | 5.59E-04 | 1.5  |
| NM_029078    | <i>Pcf11</i>    | BXD73 | 3.75E-02 | -1.5 | NS       | NS   |
| NM_178149    | <i>Pik3ip1</i>  | BXD73 | 5.18E-03 | 1.9  | NS       | NS   |
| NM_001024955 | <i>Pik3r1</i>   | BXD73 | 5.78E-05 | 1.5  | 2.87E-04 | 1.5  |
| NM_152813    | <i>Plcd3</i>    | BXD73 | 2.89E-04 | 2.1  | NS       | NS   |
| NM_001033253 | <i>Plekhg1</i>  | BXD73 | 1.37E-03 | 1.8  | 1.25E-02 | 1.7  |
| NM_013807    | <i>Plk3</i>     | BXD73 | 4.26E-02 | -1.6 | 2.40E-02 | -1.6 |
| NM_001033225 | <i>Pnrc1</i>    | BXD73 | 3.39E-02 | 1.4  | NS       | NS   |
| NM_008654    | <i>Ppp1r15a</i> | BXD73 | 4.10E-02 | 1.5  | NS       | NS   |
| NM_145404    | <i>Prmt7</i>    | BXD73 | 4.92E-03 | -1.5 | NS       | NS   |
| NM_001136079 | <i>Ptger4</i>   | BXD73 | 4.91E-02 | -1.7 | NS       | NS   |
| NM_029494    | <i>Rab30</i>    | BXD73 | 5.41E-06 | 1.9  | 1.99E-03 | 1.6  |
| NM_001099624 | <i>Rapgef2</i>  | BXD73 | 3.40E-04 | 1.5  | NS       | NS   |
| NM_001252494 | <i>Rapgef6</i>  | BXD73 | 2.08E-05 | 2.0  | 2.40E-05 | 2.0  |
| NM_028234    | <i>Rbm33</i>    | BXD73 | NS       | NS   | 3.37E-02 | 1.4  |
| NM_009062    | <i>Rgs4</i>     | BXD73 | 1.41E-03 | 1.7  | NS       | NS   |
| NM_001166553 | <i>Rnf145</i>   | BXD73 | 5.26E-03 | -1.4 | NS       | NS   |
| NM_146244    | <i>Rps6kl1</i>  | BXD73 | 6.55E-03 | 1.8  | 3.85E-03 | 1.8  |
| NM_172604    | <i>Scara3</i>   | BXD73 | 1.60E-02 | 1.6  | NS       | NS   |
| NM_011521    | <i>Sdc4</i>     | BXD73 | 2.71E-02 | 1.9  | NS       | NS   |
| NM_030261    | <i>Sesn3</i>    | BXD73 | 8.68E-03 | 1.4  | 1.41E-03 | 1.5  |
| NM_027921    | <i>Slc16a14</i> | BXD73 | 1.46E-02 | 1.6  | NS       | NS   |



|              |                |       |          |      |          |      |
|--------------|----------------|-------|----------|------|----------|------|
| NM_001159593 | <i>Slc20a1</i> | BXD73 | 2.18E-04 | -1.6 | NS       | NS   |
| NM_001199283 | <i>Slc43a2</i> | BXD73 | 5.28E-04 | 1.8  | NS       | NS   |
| NM_008539    | <i>Smad1</i>   | BXD73 | 1.14E-03 | 1.5  | NS       | NS   |
| NM_001252481 | <i>Smad2</i>   | BXD73 | NS       | NS   | 1.87E-03 | -1.7 |
| NM_009238    | <i>Sox4</i>    | BXD73 | 1.84E-02 | 1.6  | NS       | NS   |
| NM_182927    | <i>Spred3</i>  | BXD73 | 2.31E-02 | -1.9 | NS       | NS   |
| NM_009270    | <i>Sqle</i>    | BXD73 | 4.31E-02 | -1.4 | 1.87E-02 | -1.5 |
| NM_009272    | <i>Srm</i>     | BXD73 | 7.09E-04 | -1.6 | NS       | NS   |
| NM_016795    | <i>Srpk1</i>   | BXD73 | 3.70E-03 | -1.6 | NS       | NS   |
| NM_011358    | <i>Srsf2</i>   | BXD73 | 2.23E-03 | -1.5 | NS       | NS   |
| NM_001195485 | <i>Srsf7</i>   | BXD73 | 3.06E-03 | -1.8 | NS       | NS   |
| NM_133774    | <i>Stard4</i>  | BXD73 | 8.91E-05 | -2.1 | 2.01E-02 | -1.7 |
| NM_001040085 | <i>Sytl2</i>   | BXD73 | 9.37E-04 | 2.1  | NS       | NS   |
| NM_177003    | <i>Tigar</i>   | BXD73 | NS       | NS   | 3.54E-02 | -1.7 |
| NM_133706    | <i>Tmem97</i>  | BXD73 | NS       | NS   | 4.84E-03 | -1.9 |
| NM_001127233 | <i>Trp53</i>   | BXD73 | 3.73E-02 | -1.5 | NS       | NS   |
| NM_001009935 | <i>Txnip</i>   | BXD73 | 4.38E-07 | 4.4  | 3.98E-05 | 3.5  |
| NM_001169576 | <i>Ube2h</i>   | BXD73 | 1.45E-02 | 1.4  | NS       | NS   |
| NM_020603    | <i>Wdr46</i>   | BXD73 | NS       | NS   | 4.29E-02 | -1.8 |
| NM_001005342 | <i>Ypel4</i>   | BXD73 | 2.88E-02 | 2.0  | 1.78E-02 | 2.1  |
| NM_001033466 | <i>Zbtb2</i>   | BXD73 | 1.08E-02 | -1.7 | NS       | NS   |
| NM_001267583 | <i>Zfp811</i>  | BXD73 | 1.05E-03 | 1.7  | NS       | NS   |
