# Supplementary material for: Effects of Genetics and Sex on Acute Gene Expression Changes in the Hippocampus Following Neonatal Ethanol Exposure in BXD Recombinant Inbred Mouse Strains
Source: MDPI journal article supplement (doi:10.3390/brainsci12121634), 2022-11-29
Supplement: s1 [file s1]

**Supplemental Table S1.** Animal numbers used for microarray analyses. From each litter only 1 ethanol-exposed male, 1 ethanol-exposed female, 1 control male, and 1 control female were used (a minimum of 4 litters per treatment group, per sex). From these litters, a total of 128 samples were used—4 samples per treatment (control, ethanol), per sex (male, female), and per strain (B6, D2, BXD2, BXD48a, BXD60, BXD71, BXD73, BXD100).

| Strain | Sex    | Treatment | Total Number<br>(Total Litters) |
|--------|--------|-----------|---------------------------------|
| B6     | Female | Control   | 4 (4)                           |
| B6     | Female | Ethanol   | 4 (4)                           |
| B6     | Male   | Control   | 4 (4)                           |
| B6     | Male   | Ethanol   | 4 (4)                           |
| BXD2   | Female | Control   | 4 (4)                           |
| BXD2   | Female | Ethanol   | 4 (4)                           |
| BXD2   | Male   | Control   | 4 (4)                           |
| BXD2   | Male   | Ethanol   | 4 (4)                           |
| BXD48a | Female | Control   | 4 (4)                           |
| BXD48a | Female | Ethanol   | 4 (4)                           |
| BXD48a | Male   | Control   | 4 (4)                           |
| BXD48a | Male   | Ethanol   | 4 (4)                           |
| BXD60  | Female | Control   | 4 (4)                           |
| BXD60  | Female | Ethanol   | 4 (4)                           |
| BXD60  | Male   | Control   | 4 (4)                           |
| BXD60  | Male   | Ethanol   | 4 (4)                           |
| BXD71  | Female | Control   | 4 (4)                           |
| BXD71  | Female | Ethanol   | 4 (4)                           |
| BXD71  | Male   | Control   | 4 (4)                           |
| BXD71  | Male   | Ethanol   | 4 (4)                           |
| BXD73  | Female | Control   | 4 (4)                           |
| BXD73  | Female | Ethanol   | 4 (4)                           |
| BXD73  | Male   | Control   | 4 (4)                           |
| BXD73  | Male   | Ethanol   | 4 (4)                           |
| BXD100 | Female | Control   | 4 (4)                           |
| BXD100 | Female | Ethanol   | 4 (4)                           |
| BXD100 | Male   | Control   | 4 (4)                           |
| BXD100 | Male   | Ethanol   | 4 (4)                           |
| D2     | Female | Control   | 4 (4)                           |
| D2     | Female | Ethanol   | 4 (4)                           |
| D2     | Male   | Control   | 4 (4)                           |
| D2     | Male   | Ethanol   | 4 (4)                           |
