# Supplementary material for: Effects of Genetics and Sex on Acute Gene Expression Changes in the Hippocampus Following Neonatal Ethanol Exposure in BXD Recombinant Inbred Mouse Strains
Source: MDPI journal article supplement (doi:10.3390/brainsci12121634), 2022-11-29
Supplement: s1 [file s1]

**Supplemental Table S3.** Differentially expressed genes that show significant strain x treatment interaction (*adj. p* < 0.05) and fold change > 1.5.

| Accession    | Gene Symbol          | Gene Name                                                               | Adj <i>p</i> -value | Fold Change |
|--------------|----------------------|-------------------------------------------------------------------------|---------------------|-------------|
| NR_015488    | <i>A930003A15Rik</i> | RIKEN cDNA A930003A15 gene                                              | 4.29E-26            | 1.9         |
| NR_033609    | <i>A930017M01Rik</i> | RIKEN cDNA A930017M01 gene                                              | 4.49E-23            | 1.6         |
| NM_030210    | <i>Aacs</i>          | acetoacetyl-CoA synthetase                                              | 3.23E-27            | -1.5        |
| NM_001166556 | <i>Abca6</i>         | ATP binding cassette subfamily A member 6                               | 2.43E-15            | 1.6         |
| NM_013851    | <i>Abca8b</i>        | ATP-binding cassette, sub-family A (ABC1), member 8b                    | 6.79E-26            | 1.8         |
| NM_178162    | <i>Agfg2</i>         | ArfGAP with FG repeats 2                                                | 7.23E-27            | -1.7        |
| NM_007428    | <i>Agt</i>           | angiotensinogen (serpin peptidase inhibitor, clade A, member 8)         | 7.82E-15            | 2.0         |
| NM_001172146 | <i>Aimp2</i>         | aminoacyl tRNA synthetase complex-interacting multifunctional protein 2 | 2.43E-23            | -1.6        |
| NM_019764    | <i>Amotl2</i>        | angiomotin-like 2                                                       | 1.94E-17            | 1.5         |
| NM_020581    | <i>Angptl4</i>       | angiopoietin-like 4                                                     | 6.11E-27            | 1.9         |
| NM_001024851 | <i>Ankrd34a</i>      | ankyrin repeat domain 34A                                               | 1.84E-19            | -1.6        |
| NM_028390    | <i>Anln</i>          | anillin, actin binding protein                                          | 5.20E-13            | 1.5         |
| NM_001109914 | <i>Apold1</i>        | apolipoprotein L domain containing 1                                    | 1.16E-18            | 1.6         |
| NM_009705    | <i>Arg2</i>          | arginase type II                                                        | 2.83E-16            | 1.5         |
| NM_001172205 | <i>Arid5a</i>        | AT rich interactive domain 5A (MRF1-like)                               | 6.65E-29            | 2.0         |
| NM_023598    | <i>Arid5b</i>        | AT rich interactive domain 5B (MRF1-like)                               | 1.80E-33            | 1.7         |
| NM_001042591 | <i>Arrdc3</i>        | arrestin domain containing 3                                            | 1.48E-47            | 2.7         |
| NM_001042592 | <i>Arrdc4</i>        | arrestin domain containing 4                                            | 1.68E-29            | 1.8         |
| NM_016847    | <i>Avpr1a</i>        | arginine vasopressin receptor 1A                                        | 1.21E-29            | -1.9        |
| NM_001159407 | <i>B3gnt5</i>        | UDP-GlcNAc:betaGal beta-1,3-N-acetylglucosaminyltransferase 5           | 1.13E-25            | 1.6         |
| NM_001284410 | <i>Bcl2l11</i>       | BCL2-like 11 (apoptosis facilitator)                                    | 7.31E-40            | 2.5         |
| NM_007570    | <i>Btg2</i>          | BTG anti-proliferation factor 2                                         | 1.05E-33            | 1.9         |
| NM_009770    | <i>Btg3</i>          | BTG anti-proliferation factor 3                                         | 2.19E-27            | 1.7         |
| NM_016859    | <i>Bysl</i>          | bystin-like                                                             | 2.35E-18            | -1.5        |
| NM_144817    | <i>Camk1g</i>        | calcium/calmodulin-dependent protein kinase I gamma                     | 3.04E-28            | -1.5        |
| NM_178396    | <i>Car12</i>         | carbonic anhydrase 12                                                   | 5.90E-06            | 1.6         |
| NM_144820    | <i>Ccdc28a</i>       | coiled-coil domain containing 28A                                       | 1.43E-22            | 1.7         |
| NM_011337    | <i>Ccl3</i>          | chemokine (C-C motif) ligand 3                                          | 1.47E-14            | 1.7         |
| NM_007631    | <i>Ccnd1</i>         | cyclin D1                                                               | 1.59E-24            | -1.5        |

|              |                |                                                                             |          |      |
|--------------|----------------|-----------------------------------------------------------------------------|----------|------|
| NM_001170395 | <i>Cd163</i>   | CD163 antigen                                                               | 6.04E-10 | 1.5  |
| NM_007646    | <i>Cd38</i>    | CD38 antigen                                                                | 8.27E-18 | 1.7  |
| NM_001111060 | <i>Cd59a</i>   | CD59a antigen                                                               | 1.05E-13 | 1.5  |
| NM_001081345 | <i>Chd2</i>    | chromodomain helicase DNA binding protein 2                                 | 1.32E-26 | 1.5  |
| NM_001271496 | <i>Chka</i>    | choline kinase alpha                                                        | 2.30E-13 | 1.6  |
| NM_001033302 | <i>Ciart</i>   | circadian associated repressor of transcription                             | 2.05E-15 | -1.7 |
| NM_001243762 | <i>Clcn5</i>   | chloride channel, voltage-sensitive 5                                       | 4.55E-28 | 1.7  |
| NM_016674    | <i>Cldn1</i>   | claudin 1                                                                   | 1.18E-04 | 1.6  |
| NM_172469    | <i>Clic6</i>   | chloride intracellular channel 6                                            | 4.43E-02 | 1.8  |
| NM_153384    | <i>Clrn1</i>   | clarin 1                                                                    | 3.27E-19 | 1.5  |
| NM_009898    | <i>Coro1a</i>  | coronin, actin binding protein 1A                                           | 1.63E-18 | -1.5 |
| NM_001252525 | <i>Cpeb1</i>   | cytoplasmic polyadenylation element binding protein 1 [ <i>Mus musculus</i> | 2.06E-24 | 1.8  |
| NM_011957    | <i>Creb3l1</i> | cAMP responsive element binding protein 3-like 1 [ <i>Mus musculus</i>      | 6.47E-15 | -1.5 |
| NM_172728    | <i>Creb5</i>   | cAMP responsive element binding protein 5                                   | 1.00E-26 | 1.8  |
| NM_001110850 | <i>Crem</i>    | cAMP responsive element modulator                                           | 2.33E-33 | 1.8  |
| NM_007762    | <i>Crhr1</i>   | corticotropin releasing hormone receptor 1                                  | 7.82E-32 | -1.9 |
| NM_001145799 | <i>Ctla2a</i>  | cytotoxic T lymphocyte-associated protein 2 alpha                           | 9.60E-17 | 1.5  |
| NM_153775    | <i>Ctu2</i>    | cytosolic thiouridylase subunit 2                                           | 7.39E-17 | -1.5 |
| NM_009994    | <i>Cyp1b1</i>  | cytochrome P450, family 1, subfamily b, polypeptide 1                       | 2.67E-23 | 2.0  |
| NM_001177713 | <i>Cyp26b1</i> | cytochrome P450, family 26, subfamily b, polypeptide 1                      | 6.96E-14 | -1.5 |
| NM_028979    | <i>Cyp2j9</i>  | cytochrome P450, family 2, subfamily j, polypeptide 9                       | 3.50E-28 | 1.8  |
| NM_010516    | <i>Cyr61</i>   | cellular communication network factor 1                                     | 2.20E-18 | 1.5  |
| NM_007837    | <i>Ddit3</i>   | DNA-damage inducible transcript 3                                           | 1.24E-15 | 1.5  |
| NM_053272    | <i>Dhcr24</i>  | 24-dehydrocholesterol reductase                                             | 3.80E-48 | -1.7 |
| NR_002854    | <i>Dlx1as</i>  | distal-less homeobox 1                                                      | 2.48E-17 | -1.6 |
| NM_013642    | <i>Dusp1</i>   | dual specificity phosphatase 1                                              | 2.94E-47 | 2.4  |
| NM_019819    | <i>Dusp14</i>  | dual specificity phosphatase 14                                             | 6.09E-16 | 1.5  |
| NM_001048054 | <i>Dusp16</i>  | dual specificity phosphatase 16                                             | 6.68E-35 | 2.0  |
| NM_176933    | <i>Dusp4</i>   | dual specificity phosphatase 4                                              | 9.31E-19 | -1.5 |
| NM_026268    | <i>Dusp6</i>   | dual specificity phosphatase 6                                              | 7.13E-26 | -1.6 |
| NM_153459    | <i>Dusp7</i>   | dual specificity phosphatase 7                                              | 1.11E-16 | -1.5 |

|              |                |                                                                     |          |      |
|--------------|----------------|---------------------------------------------------------------------|----------|------|
| NM_008748    | <i>Dusp8</i>   | dual specificity phosphatase 8                                      | 5.63E-41 | 1.5  |
| NM_010104    | <i>Edn1</i>    | endothelin 1                                                        | 9.30E-23 | 2.1  |
| NM_001289925 | <i>Egr3</i>    | early growth response 3                                             | 6.61E-34 | -2.1 |
| NM_018781    | <i>Egr3</i>    | early growth response 3<br>leucine rich repeat and fibronectin type | 3.46E-15 | -1.5 |
| NM_175522    | <i>Elfn1</i>   | III, extracellular 1                                                | 1.53E-16 | -1.5 |
| NM_008815    | <i>Etv4</i>    | ets variant 4                                                       | 6.10E-27 | -1.6 |
| NM_023794    | <i>Etv5</i>    | ets variant 5                                                       | 3.01E-30 | -1.7 |
| NM_183187    | <i>Fam107a</i> | family with sequence similarity 107,<br>member A                    | 6.75E-42 | 3.3  |
| NM_153574    | <i>Fam13a</i>  | family with sequence similarity 13,<br>member A                     | 5.34E-17 | 1.5  |
| NM_178908    | <i>Fam26e</i>  | calcium homeostasis modulator family<br>member 5                    | 3.31E-36 | 2.0  |
| NM_175104    | <i>Fam53c</i>  | family with sequence similarity 53,<br>member C                     | 1.05E-27 | 1.7  |
| NM_011812    | <i>Fbln5</i>   | fibulin 5                                                           | 3.39E-02 | 1.5  |
| NM_026346    | <i>Fbxo32</i>  | F-box protein 32                                                    | 1.33E-14 | 1.5  |
| NM_010191    | <i>Fdft1</i>   | farnesyl diphosphate farnesyl<br>transferase 1                      | 2.21E-42 | -1.5 |
| NM_001253751 | <i>Fdps</i>    | farnesyl diphosphate synthetase                                     | 2.05E-23 | -1.5 |
| NM_010197    | <i>Fgf1</i>    | fibroblast growth factor 1                                          | 1.61E-13 | 1.5  |
| NM_001163215 | <i>Fgfr3</i>   | fibroblast growth factor receptor 3                                 | 2.78E-24 | 1.6  |
| NM_001164259 | <i>Fgfr1l</i>  | fibroblast growth factor receptor-like 1                            | 5.65E-24 | -1.5 |
| NM_001159706 | <i>Folh1</i>   | folate hydrolase 1                                                  | 4.16E-26 | 1.9  |
| NM_011817    | <i>Gadd45g</i> | growth arrest and DNA-damage-<br>inducible 45 gamma                 | 3.55E-16 | 1.5  |
| NM_028022    | <i>Gatsl3</i>  | cytosolic arginine sensor for mTORC1<br>subunit 1                   | 2.97E-19 | 1.7  |
| NM_001010937 | <i>Gjb6</i>    | gap junction protein, beta 6                                        | 1.87E-11 | 1.9  |
| NM_029102    | <i>Glt8d2</i>  | glycosyltransferase 8 domain<br>containing 2                        | 1.77E-22 | 1.8  |
| NM_001110809 | <i>Gpatch4</i> | G patch domain containing 4                                         | 1.70E-20 | -1.5 |
| NM_027518    | <i>Gpr137c</i> | G protein-coupled receptor 137C                                     | 1.33E-46 | 2.1  |
| NM_010338    | <i>Gpr37</i>   | G protein-coupled receptor 37                                       | 2.49E-27 | 1.6  |
| NM_145066    | <i>Gpr85</i>   | G protein-coupled receptor 85                                       | 6.20E-26 | 1.5  |
| NM_153419    | <i>Grwd1</i>   | glutamate-rich WD repeat containing 1                               | 1.08E-21 | -1.6 |
| NM_008216    | <i>Has2</i>    | hyaluronan synthase 2                                               | 6.21E-16 | -1.7 |
| NM_198962    | <i>Hcrtr2</i>  | hypocretin (orexin) receptor 2                                      | 7.02E-22 | -1.6 |
| NM_144835    | <i>Heatr1</i>  | HEAT repeat containing 1                                            | 2.73E-26 | -1.6 |
| NM_175256    | <i>Heg1</i>    | heart development protein with EGF<br>like domains 1                | 6.46E-21 | 1.5  |

|              |                 |                                                                     |          |      |
|--------------|-----------------|---------------------------------------------------------------------|----------|------|
| NM_001162950 | <i>Hif3a</i>    | hypoxia inducible factor 3, alpha subunit                           | 2.61E-17 | 1.7  |
| NM_008252    | <i>Hmgb2</i>    | high mobility group box 2                                           | 1.16E-18 | 1.5  |
| NM_008255    | <i>Hmgcr</i>    | 3-hydroxy-3-methylglutaryl-Coenzyme A reductase                     | 1.14E-33 | -1.6 |
| NM_008256    | <i>Hmgcs2</i>   | 3-hydroxy-3-methylglutaryl-Coenzyme A synthase 2                    | 1.58E-27 | 2.1  |
| NM_007545    | <i>Hrk</i>      | harakiri, BCL2 interacting protein (contains only BH3 domain)       | 9.28E-20 | 1.5  |
| NM_010476    | <i>Hsd17b7</i>  | hydroxysteroid (17-beta) dehydrogenase 7                            | 2.95E-38 | -1.7 |
| NM_019564    | <i>Htra1</i>    | HtrA serine peptidase 1                                             | 2.19E-30 | 1.7  |
| NM_015790    | <i>Icosl</i>    | icos ligand                                                         | 1.00E-17 | 1.5  |
| NM_010495    | <i>Id1</i>      | inhibitor of DNA binding 1, HLH protein                             | 4.58E-17 | 1.5  |
| NM_031166    | <i>Id4</i>      | inhibitor of DNA binding 4                                          | 1.30E-14 | 1.6  |
| NM_145360    | <i>Idi1</i>     | isopentenyl-diphosphate delta isomerase                             | 1.85E-48 | -2.2 |
| NM_001101605 | <i>Ifit1bl1</i> | interferon induced protein with tetratricopeptide repeats 1B like 1 | 6.77E-16 | 1.6  |
| NM_013562    | <i>Ifrd1</i>    | interferon-related developmental regulator 1                        | 5.04E-24 | -1.6 |
| NM_172439    | <i>Inpp5j</i>   | inositol polyphosphate 5-phosphatase J                              | 7.71E-25 | 1.7  |
| NM_153526    | <i>Insig1</i>   | insulin induced gene 1                                              | 1.44E-42 | -2.2 |
| NM_016851    | <i>Irf6</i>     | interferon regulatory factor 6                                      | 5.41E-19 | 1.5  |
| NM_010591    | <i>Jun</i>      | Jun proto-oncogene, AP-1 transcription factor subunit               | 3.20E-60 | 3.2  |
| NM_001286944 | <i>Jund</i>     | JunD proto-oncogene, AP-1 transcription factor subunit              | 1.05E-34 | 1.7  |
| NM_001081134 | <i>Kcng1</i>    | potassium voltage-gated channel, subfamily G, member 1              | 7.56E-30 | -1.8 |
| NM_001110227 | <i>Kcnj13</i>   | potassium inwardly-rectifying channel, subfamily J, member 13       | 2.69E-02 | 2.0  |
| NR_045177    | <i>Kctd16</i>   | potassium channel tetramerisation domain containing 16              | 1.43E-27 | 1.6  |
| NM_026135    | <i>Kctd16</i>   | potassium channel tetramerisation domain containing 16              | 9.88E-21 | 1.5  |
| NM_078477    | <i>Klf16</i>    | Kruppel-like factor 16                                              | 6.82E-34 | -1.8 |
| NM_001252658 | <i>Ldlr</i>     | low density lipoprotein receptor                                    | 2.07E-37 | -2.3 |
| NM_001083125 | <i>Lhx6</i>     | LIM homeobox protein 6                                              | 3.47E-15 | -1.5 |
| NM_028894    | <i>Lonrf3</i>   | LON peptidase N-terminal domain and ring finger 3                   | 1.79E-14 | 1.5  |
| NM_181470    | <i>Ltv1</i>     | LON peptidase N-terminal domain and ring finger 3                   | 3.80E-18 | -1.5 |
| NM_001271416 | <i>Ly6a</i>     | lymphocyte antigen 6 complex, locus A                               | 1.40E-13 | 1.5  |

|              |                |                                                                               |          |      |
|--------------|----------------|-------------------------------------------------------------------------------|----------|------|
| NM_001252055 | <i>Ly6c1</i>   | lymphocyte antigen 6 complex, locus C1                                        | 3.71E-24 | 2.0  |
| NM_001171187 | <i>Mal</i>     | myelin and lymphocyte protein, T cell differentiation protein                 | 3.92E-17 | 1.5  |
| NM_011737    | <i>Map3k19</i> | mitogen-activated protein kinase kinase kinase 19                             | 6.66E-09 | 1.5  |
| NM_008563    | <i>Mcm3</i>    | minichromosome maintenance complex component 3                                | 1.28E-16 | -1.5 |
| NM_001012335 | <i>Mdk</i>     | midkine                                                                       | 4.22E-14 | 1.5  |
| NM_008587    | <i>Mertk</i>   | MER proto-oncogene tyrosine kinase                                            | 1.83E-26 | 1.9  |
| NM_001163833 | <i>Msl3l2</i>  | MSL3 like 2                                                                   | 2.40E-15 | 1.5  |
| NM_025436    | <i>Msmo1</i>   | methylsterol monooxygenase 1                                                  | 5.20E-43 | -2.3 |
| NM_013602    | <i>Mt1</i>     | metallothionein 1                                                             | 4.56E-34 | 1.6  |
| NM_008630    | <i>Mt2</i>     | metallothionein 2                                                             | 1.98E-43 | 2.7  |
| NM_138656    | <i>Mvd</i>     | mevalonate diphosphate decarboxylase                                          | 6.34E-38 | -2.1 |
| NM_001008542 | <i>Mxi1</i>    | MAX interactor 1, dimerization protein                                        | 1.63E-46 | 1.8  |
| NM_178728    | <i>Napepld</i> | N-acyl phosphatidylethanolamine phospholipase D                               | 2.98E-14 | 1.6  |
| NM_022565    | <i>Ndst4</i>   | N-deacetylase/N-sulfotransferase (heparin glucosaminyl) 4                     | 2.63E-17 | 1.5  |
| NM_028995    | <i>Nipal3</i>  | NIPA-like domain containing 3                                                 | 6.65E-23 | 1.6  |
| NM_024193    | <i>Nop56</i>   | NOP56 ribonucleoprotein                                                       | 5.39E-23 | -1.5 |
| NM_010342    | <i>Npbwr1</i>  | neuropeptides B/W receptor 1                                                  | 1.85E-20 | 1.5  |
| NM_178644    | <i>Oaf</i>     | out at first homolog                                                          | 5.42E-16 | 1.6  |
| NM_011859    | <i>Osr1</i>    | odd-skipped related transcription factor 1                                    | 1.91E-05 | 1.5  |
| NM_001286481 | <i>Otx2</i>    | orthodenticle homeobox 2                                                      | 3.05E-02 | 1.7  |
| NM_001008497 | <i>P2ry14</i>  | purinergic receptor P2Y, G-protein coupled, 14                                | 1.22E-11 | 1.5  |
| NM_153594    | <i>Pcmt2</i>   | protein-L-isoaspartate (D-aspartate) O-methyltransferase domain containing 2  | 3.50E-25 | 1.6  |
| NM_016861    | <i>Pdlim1</i>  | PDZ and LIM domain 1 (elfin)                                                  | 6.76E-17 | 1.7  |
| NM_001159367 | <i>Per1</i>    | period circadian clock 1                                                      | 4.91E-24 | 1.5  |
| NM_178149    | <i>Pik3ip1</i> | phosphoinositide-3-kinase interacting protein 1                               | 5.02E-37 | 2.1  |
| NM_001024955 | <i>Pik3r1</i>  | phosphoinositide-3-kinase regulatory subunit 1                                | 2.81E-52 | 1.8  |
| NM_145478    | <i>Pim3</i>    | proviral integration site 3                                                   | 1.05E-13 | -1.5 |
| NM_008872    | <i>Plat</i>    | plasminogen activator, tissue                                                 | 1.50E-19 | 1.5  |
| NM_152813    | <i>Plcd3</i>   | phospholipase C, delta 3                                                      | 4.03E-28 | 1.7  |
| NM_001033253 | <i>Plekhg1</i> | pleckstrin homology domain containing, family G (with RhoGef domain) member 1 | 1.02E-38 | 2.0  |

|              |                 |                                                                        |          |      |
|--------------|-----------------|------------------------------------------------------------------------|----------|------|
| NM_013807    | <i>Plk3</i>     | polo like kinase 3                                                     | 1.70E-31 | -1.7 |
| NM_001164630 | <i>Pwmp3b</i>   | PWWP domain containing 3B                                              | 7.21E-14 | 1.5  |
| NM_029494    | <i>Rab30</i>    | RAB30, member RAS oncogene family                                      | 4.38E-44 | 1.9  |
| NM_001099624 | <i>Rapgef2</i>  | Rap guanine nucleotide exchange factor 2                               | 4.60E-46 | 1.7  |
| NM_001252494 | <i>Rapgef6</i>  | Rap guanine nucleotide exchange factor (GEF) 6                         | 8.64E-46 | 2.1  |
| NM_009062    | <i>Rgs4</i>     | regulator of G-protein signaling 4                                     | 1.98E-23 | 1.5  |
| NM_153514    | <i>Rhobtb2</i>  | Rho related BTB domain containing 2                                    | 3.77E-24 | -1.5 |
| NM_172612    | <i>Rnd1</i>     | Rho family GTPase 1                                                    | 1.45E-21 | -1.5 |
| NM_001166553 | <i>Rnf145</i>   | ring finger protein 145                                                | 1.01E-33 | -1.5 |
| NM_133982    | <i>Rpp25</i>    | ribonuclease P/MRP 25 subunit                                          | 4.57E-22 | -1.5 |
| NM_146244    | <i>Rps6kl1</i>  | ribosomal protein S6 kinase-like 1                                     | 1.01E-33 | 1.8  |
| NM_011521    | <i>Sdc4</i>     | syndecan 4                                                             | 6.79E-33 | 2.2  |
| NM_030261    | <i>Sesn3</i>    | sestrin 3                                                              | 4.25E-32 | 1.5  |
| NM_016687    | <i>Sfrp4</i>    | secreted frizzled related protein 4                                    | 1.00E-15 | 1.6  |
| NM_001168525 | <i>Sgms1</i>    | sphingomyelin synthase 1                                               | 8.19E-14 | 1.5  |
| NM_028943    | <i>Sgms2</i>    | sphingomyelin synthase 2                                               | 3.96E-05 | 1.5  |
| NM_027921    | <i>Slc16a14</i> | solute carrier family 16 (monocarboxylic acid transporters), member 14 | 3.51E-27 | 1.5  |
| NM_001029842 | <i>Slc16a6</i>  | solute carrier family 16 (monocarboxylic acid transporters), member 6  | 1.28E-23 | 1.8  |
| NM_025807    | <i>Slc16a9</i>  | solute carrier family 16 (monocarboxylic acid transporters), member 9  | 2.35E-07 | 1.5  |
| NM_011400    | <i>Slc2a1</i>   | solute carrier family 2 (facilitated glucose transporter), member 1    | 4.41E-28 | 1.7  |
| NM_178934    | <i>Slc2a12</i>  | solute carrier family 2 (facilitated glucose transporter), member 12   | 3.84E-08 | 1.9  |
| NM_001199283 | <i>Slc43a2</i>  | solute carrier family 43, member 2                                     | 9.51E-26 | 1.5  |
| NM_001081263 | <i>Slc44a5</i>  | solute carrier family 44, member 5                                     | 4.36E-38 | 1.8  |
| NM_139142    | <i>Slc6a20a</i> | solute carrier family 6 (neurotransmitter transporter), member 20A     | 9.75E-06 | 1.6  |
| NM_001038643 | <i>Slco3a1</i>  | solute carrier organic anion transporter family, member 3a1            | 3.95E-27 | -1.5 |
| NM_134133    | <i>Smim3</i>    | small integral membrane protein 3                                      | 4.01E-16 | 1.6  |
| NM_182927    | <i>Spred3</i>   | sprouty-related EVH1 domain containing 3                               | 1.66E-31 | -2.0 |
| NM_011898    | <i>Spry4</i>    | sprouty RTK signaling antagonist 4                                     | 3.04E-31 | -1.9 |
| NM_009270    | <i>Sqle</i>     | squalene epoxidase                                                     | 2.68E-34 | -1.6 |
| NM_011358    | <i>Srsf2</i>    | serine and arginine rich splicing factor 2                             | 3.51E-30 | -1.5 |

|              |                |                                                                  |          |      |
|--------------|----------------|------------------------------------------------------------------|----------|------|
| NM_001195485 | <i>Srsf7</i>   | serine and arginine-rich splicing factor 7                       | 2.69E-27 | -1.6 |
| NM_133774    | <i>Stard4</i>  | StAR-related lipid transfer (START) domain containing 4          | 8.50E-33 | -1.8 |
| NM_027399    | <i>Steap1</i>  | six transmembrane epithelial antigen of the prostate 1           | 1.31E-03 | 1.5  |
| NM_019675    | <i>Stmn4</i>   | stathmin-like 4                                                  | 2.23E-22 | 1.5  |
| NM_013515    | <i>Stom</i>    | stomatin                                                         | 2.98E-13 | 1.5  |
| NM_133670    | <i>Sult1a1</i> | sulfotransferase family 1A, phenol-preferring, member 1          | 1.42E-13 | 1.7  |
| NM_017465    | <i>Sult2b1</i> | sulfotransferase family, cytosolic, 2B, member 1                 | 2.44E-11 | 1.5  |
| NM_001040085 | <i>Sytl2</i>   | synaptotagmin-like 2                                             | 1.16E-28 | 1.8  |
| NM_001082976 | <i>Tc2n</i>    | tandem C2 domains, nuclear                                       | 3.01E-03 | 1.6  |
| NM_009368    | <i>Tgfb3</i>   | transforming growth factor, beta 3                               | 3.69E-14 | 1.6  |
| NM_174989    | <i>Ticam1</i>  | toll-like receptor adaptor molecule 1                            | 2.03E-22 | 1.8  |
| NM_133211    | <i>Tlr7</i>    | toll-like receptor 7                                             | 1.72E-17 | 1.6  |
| NM_001160385 | <i>Tmem196</i> | transmembrane protein 196                                        | 1.01E-18 | 1.5  |
| NM_177344    | <i>Tmem203</i> | transmembrane protein 203                                        | 5.70E-18 | -1.5 |
| NM_133706    | <i>Tmem97</i>  | transmembrane protein 97                                         | 1.57E-23 | -1.6 |
| NM_001170855 | <i>Trim36</i>  | tripartite motif-containing 36                                   | 2.58E-14 | -1.5 |
| NM_001170912 | <i>Trim66</i>  | tripartite motif containing 66                                   | 1.00E-15 | 1.6  |
| NM_012035    | <i>Trpc7</i>   | transient receptor potential cation channel subfamily C member 7 | 1.27E-13 | -1.5 |
| NM_001009935 | <i>Txnip</i>   | thioredoxin interacting protein                                  | 1.51E-43 | 3.8  |
| NM_001169576 | <i>Ube2h</i>   | ubiquitin conjugating enzyme E2 H                                | 5.01E-33 | 1.5  |
| NM_175158    | <i>Utp20</i>   | UTP20 small subunit processome component                         | 3.61E-18 | -1.5 |
| NM_001039385 | <i>Vgf</i>     | VGF nerve growth factor inducible                                | 1.37E-26 | -1.9 |
| NM_172372    | <i>Wdr45</i>   | WD repeat domain 45                                              | 5.48E-20 | 1.5  |
| NM_020603    | <i>Wdr46</i>   | WD repeat domain 46                                              | 8.66E-18 | -1.5 |
| NM_001005342 | <i>Ypel4</i>   | yippee like 4                                                    | 2.16E-34 | 2.4  |
| NM_027166    | <i>Ypel5</i>   | yippee like 5                                                    | 3.80E-34 | 1.5  |
| NM_001033324 | <i>Zbtb16</i>  | zinc finger and BTB domain containing 16                         | 3.70E-16 | 1.5  |
| NM_001110309 | <i>Zfp426</i>  | zinc finger protein 426                                          | 3.11E-26 | 1.5  |
| NM_001005425 | <i>Zfp663</i>  | zinc finger protein 663                                          | 3.60E-12 | 1.6  |
| NM_001252584 | <i>Zmynd8</i>  | zinc finger MYND-type containing 8                               | 3.03E-23 | 1.5  |
