# Supplementary material for: Effects of Genetics and Sex on Acute Gene Expression Changes in the Hippocampus Following Neonatal Ethanol Exposure in BXD Recombinant Inbred Mouse Strains
Source: Brain Sci. 2022 Nov 29;12(12):1634. doi: 10.3390/brainsci12121634 (PMC9776411; doi:10.3390/brainsci12121634)
Supplement: Supplementary file 1 [file brainsci-12-01634-s001.zip]

Archive with 4 entries (4 files):
- Baker et al 2022 Supplemental Figure S1.pdf
- Baker et al 2022 Supplemental Table S1.pdf
- Baker et al 2022 Supplemental Table S3.pdf
- Baker et al Supplemental Table S2.pdf
